# Supplementary material
Source: PubMed Central journal article supplement (PMC2783774)
Supplement: NIHMS155491-supplement-Supplemental.pdf [file NIHMS155491-supplement-Supplemental.pdf]

Supplemental Table 1: A list of pre-miRNA host genes

Supplemental Table 1: A list of pre-miRNA host genes

| pre-miRNA ID | MI ID     | pre-miRNA location (hg18)    | Host gene    | Host gene location (hg18)    | Entrez ID | Direction |
|--------------|-----------|------------------------------|--------------|------------------------------|-----------|-----------|
| mir-553      | MI0003558 | chr1:100519385-100519452(+)  | RTCD1        | chr1:100504351-100529915(+)  | 8634      | same      |
| mir-942      | MI0005767 | chr1:117438788-117438873(+)  | TTF2         | chr1:117404472-117447015(+)  | 8458      | same      |
| mir-554      | MI0003559 | chr1:149784896-149784991(+)  | TUFT1        | chr1:149779405-149822683(+)  | 7286      | same      |
| mir-92b      | MI0003560 | chr1:153431592-153431687(+)  | LOC100133278 | chr1:153430761-153433387(+)  | 100133278 | same      |
| mir-555      | MI0003561 | chr1:153582765-153582860(-)  | ASH1L        | chr1:153571676-153798948(-)  | 55870     | same      |
| mir-9-1      | MI0000466 | chr1:154656757-154656845(-)  | C1orf61      | chr1:154640679-154665808(-)  | 10485     | same      |
| mir-765      | MI0005116 | chr1:155172547-155172660(-)  | ARHGEF11     | chr1:155171256-155281786(-)  | 9826      | same      |
| mir-556      | MI0003562 | chr1:160578960-160579054(+)  | NOS1AP       | chr1:160306205-160604864(+)  | 9722      | same      |
| mir-921      | MI0005713 | chr1:164390604-164390659(-)  | FAM78B       | chr1:164305880-164402830(-)  | 149297    | same      |
| mir-1255b-2  | MI0006436 | chr1:166234522-166234588(+)  | IQWD1        | chr1:166172532-166311705(+)  | 55827     | same      |
| mir-1295     | MI0006357 | chr1:169337493-169337571(-)  | FMO3         | chr1:169326660-169353583(+)  | 2328      | different |
| mir-214      | MI0000290 | chr1:170374561-170374670(-)  | DNM3         | chr1:170077261-170648480(+)  | 26052     | different |
| mir-214      | MI0000290 | chr1:170374561-170374670(-)  | LOC100128178 | chr1:170373297-170519205(-)  | 100128178 | same      |
| mir-199a-2   | MI0000281 | chr1:170380298-170380407(-)  | DNM3         | chr1:170077261-170648480(+)  | 26052     | different |
| mir-199a-2   | MI0000281 | chr1:170380298-170380407(-)  | LOC100128178 | chr1:170373297-170519205(-)  | 100128178 | same      |
| mir-488      | MI0003123 | chr1:175265122-175265204(-)  | ASTN1        | chr1:175096826-175400647(-)  | 460       | same      |
| mir-1290     | MI0006352 | chr1:19096152-19096229(-)    | ALDH4A1      | chr1:19070513-19101659(-)    | 8659      | same      |
| mir-1278     | MI0006425 | chr1:191372256-191372336(+)  | CDC73        | chr1:191357784-191487679(+)  | 79577     | same      |
| mir-1231     | MI0006321 | chr1:200044362-200044453(+)  | NAV1         | chr1:199884073-200061078(+)  | 89796     | same      |
| mir-205      | MI0000285 | chr1:207672101-207672210(+)  | LOC642587    | chr1:207668791-207672517(+)  | 642587    | same      |
| mir-1256     | MI0006390 | chr1:21187394-21187512(-)    | EIF4G3       | chr1:21005559-21375927(-)    | 8672      | same      |
| mir-215      | MI0000291 | chr1:218357818-218357927(-)  | IARS2        | chr1:218334078-218388006(+)  | 55699     | different |
| mir-194-1    | MI0000488 | chr1:218358122-218358206(-)  | IARS2        | chr1:218334078-218388006(+)  | 55699     | different |
| mir-664      | MI0006442 | chr1:218440503-218440584(-)  | RAB3GAP2     | chr1:218390350-218512375(-)  | 25782     | same      |
| mir-320b-2   | MI0003839 | chr1:222511329-222511466(-)  | NVL          | chr1:222481659-222584495(-)  | 4931      | same      |
| mir-1182     | MI0006275 | chr1:229222197-229222293(-)  | FAM89A       | chr1:229221545-229242608(-)  | 375061    | same      |
| mir-1537     | MI0007258 | chr1:234082923-234082983(-)  | LYST         | chr1:233890966-234096843(-)  | 1130      | same      |
| mir-1976     | MI0009986 | chr1:26753620-26753671(+)    | RPS6KA1      | chr1:26728836-26774107(+)    | 6195      | same      |
| mir-551a     | MI0003556 | chr1:3467119-3467214(-)      | MEGF6        | chr1:3394366-3517919(-)      | 1953      | same      |
| mir-30e      | MI0000749 | chr1:40992614-40992705(+)    | NFYC         | chr1:40929829-41009862(+)    | 4802      | same      |
| mir-30c-1    | MI0000736 | chr1:40995543-40995631(+)    | NFYC         | chr1:40929829-41009862(+)    | 4802      | same      |
| mir-1262     | MI0006397 | chr1:68421789-68421881(-)    | GPR177       | chr1:68336739-68470841(-)    | 79971     | same      |
| mir-186      | MI0000483 | chr1:71305902-71305987(-)    | ZRANB2       | chr1:71301562-71319333(-)    | 9406      | same      |
| mir-186      | MI0000483 | chr1:71305902-71305987(-)    | LOC100132618 | chr1:71284777-71309212(+)    | 100132618 | different |
| mir-1287     | MI0006349 | chr10:100144965-100145054(-) | C10orf33     | chr10:100133314-100164931(-) | 84795     | same      |

Supplemental Table 1: A list of pre-miRNA host genes

| pre-miRNA ID | MI ID     | pre-miRNA location (hg18)    | Host gene    | Host gene location (hg18)    | Entrez ID | Direction |
|--------------|-----------|------------------------------|--------------|------------------------------|-----------|-----------|
| mir-608      | MI0003621 | chr10:102724732-102724831(+) | SEMA4G       | chr10:102722276-102735362(+) | 57715     | same      |
| mir-1307     | MI0006444 | chr10:105144000-105144148(-) | USMG5        | chr10:105138804-105146213(-) | 84833     | same      |
| mir-936      | MI0005758 | chr10:105797837-105797934(-) | COL17A1      | chr10:105781036-105835628(-) | 1308      | same      |
| mir-609      | MI0003622 | chr10:105968537-105968631(-) | C10orf79     | chr10:105879636-105982110(-) | 80217     | same      |
| mir-548e     | MI0006344 | chr10:112738674-112738761(+) | SHOC2        | chr10:112713903-112763413(+) | 8036      | same      |
| mir-2110     | MI0010629 | chr10:115923854-115923928(-) | C10orf118    | chr10:115871964-115924354(-) | 55088     | same      |
| mir-511-1    | MI0003127 | chr10:17927113-17927199(+)   | MRC1L1       | chr10:17891368-17993184(+)   | 414308    | same      |
| mir-511-2    | MI0003128 | chr10:18174042-18174128(+)   | MRC1         | chr10:18138358-18240097(+)   | 4360      | same      |
| mir-1915     | MI0008336 | chr10:21825497-21825576(-)   | C10orf114    | chr10:21823427-21826197(-)   | 399726    | same      |
| mir-603      | MI0003616 | chr10:24604620-24604716(+)   | KIAA1217     | chr10:24023681-24876778(+)   | 56243     | same      |
| mir-604      | MI0003617 | chr10:29873939-29874032(-)   | SVIL         | chr10:29786283-30064736(-)   | 6840      | same      |
| mir-938      | MI0005760 | chr10:29931199-29931281(-)   | SVIL         | chr10:29786283-30064736(-)   | 6840      | same      |
| mir-605      | MI0003618 | chr10:52729339-52729421(+)   | PRKG1        | chr10:52420951-53725280(+)   | 5592      | same      |
| mir-548f-1   | MI0006374 | chr10:56037640-56037723(-)   | PCDH15       | chr10:55250866-56231057(-)   | 65217     | same      |
| mir-1296     | MI0003780 | chr10:64802723-64802814(-)   | JMJD1C       | chr10:64596991-64895728(-)   | 221037    | same      |
| mir-1254     | MI0006388 | chr10:70189081-70189177(+)   | CCAR1        | chr10:70150977-70221315(+)   | 55749     | same      |
| mir-346      | MI0000826 | chr10:88014431-88014525(-)   | GRID1        | chr10:87349292-88116230(-)   | 2894      | same      |
| mir-107      | MI0000114 | chr10:91342484-91342564(-)   | PANK1        | chr10:91332729-91395195(-)   | 53354     | same      |
| mir-34b      | MI0000742 | chr11:110888873-110888956(+) | LOC728196    | chr11:110886535-110889823(+) | 728196    | same      |
| mir-34c      | MI0000743 | chr11:110889374-110889450(+) | LOC728196    | chr11:110886535-110889823(+) | 728196    | same      |
| mir-675      | MI0005416 | chr11:1974565-1974637(-)     | H19          | chr11:1972982-1975641(-)     | 283120    | same      |
| mir-483      | MI0002467 | chr11:2111940-2112015(-)     | IGF2         | chr11:2106923-2127409(-)     | 3481      | same      |
| mir-483      | MI0002467 | chr11:2111940-2112015(-)     | INS-IGF2     | chr11:2106926-2139015(-)     | 723961    | same      |
| mir-610      | MI0003623 | chr11:28034938-28035033(+)   | KIF18A       | chr11:27998739-28086322(-)   | 81930     | different |
| mir-129-2    | MI0000473 | chr11:43559520-43559609(+)   | LOC100131381 | chr11:43548532-43562727(+)   | 100131381 | same      |
| mir-611      | MI0003624 | chr11:61316543-61316609(-)   | C11orf10     | chr11:61313181-61316661(-)   | 746       | same      |
| mir-1908     | MI0008329 | chr11:61339209-61339288(-)   | FADS1        | chr11:61323679-61340886(-)   | 3992      | same      |
| mir-1237     | MI0006327 | chr11:63892650-63892751(+)   | RPS6KA4      | chr11:63883201-63896263(+)   | 8986      | same      |
| mir-548k     | MI0006354 | chr11:69807709-69807824(+)   | PPFIA1       | chr11:69794471-69908150(+)   | 8500      | same      |
| mir-139      | MI0000261 | chr11:72003755-72003822(-)   | PDE2A        | chr11:71964833-72063060(-)   | 5138      | same      |
| mir-326      | MI0000808 | chr11:74723784-74723878(-)   | ARRB1        | chr11:74654130-74740521(-)   | 408       | same      |
| mir-548l     | MI0006361 | chr11:93839309-93839394(-)   | MRE11A       | chr11:93790114-93866688(-)   | 4361      | same      |
| mir-619      | MI0003633 | chr12:107754813-107754911(-) | SSH1         | chr12:107705099-107775480(-) | 54434     | same      |
| mir-620      | MI0003634 | chr12:115070748-115070842(-) | MED13L       | chr12:114880764-115199526(-) | 23389     | same      |
| mir-1178     | MI0006271 | chr12:118635822-118635912(-) | CIT          | chr12:118607981-118799475(-) | 11113     | same      |
| mir-1244     | MI0006379 | chr12:12156153-12156237(+)   | BCL2L14      | chr12:12115145-12255214(+)   | 79370     | same      |
| mir-1244     | MI0006379 | chr12:12156153-12156237(+)   | LOC643287    | chr12:12155184-12156395(+)   | 643287    | same      |

Supplemental Table 1: A list of pre-miRNA host genes

| pre-miRNA ID | MI ID     | pre-miRNA location (hg18)    | Host gene | Host gene location (hg18)    | Entrez ID | Direction |
|--------------|-----------|------------------------------|-----------|------------------------------|-----------|-----------|
| mir-920      | MI0005712 | chr12:24256622-24256696(+)   | SOX5      | chr12:23576498-24606647(-)   | 6660      | different |
| mir-1291     | MI0006353 | chr12:47334494-47334580(-)   | C12orf41  | chr12:47333261-47362302(-)   | 54934     | same      |
| mir-1293     | MI0006355 | chr12:48914192-48914262(-)   | LIMA1     | chr12:48855838-48963539(-)   | 51474     | same      |
| mir-615      | MI0003628 | chr12:52714001-52714096(+)   | HOXC4     | chr12:52696909-52736081(+)   | 3221      | same      |
| mir-615      | MI0003628 | chr12:52714001-52714096(+)   | HOXC5     | chr12:52696909-52715412(+)   | 3222      | same      |
| mir-148b     | MI0000811 | chr12:53017267-53017365(+)   | COPZ1     | chr12:53005178-53031900(+)   | 22818     | same      |
| mir-1228     | MI0006318 | chr12:55874554-55874626(+)   | LRP1      | chr12:55808549-55893409(+)   | 4035      | same      |
| mir-616      | MI0003629 | chr12:56199213-56199309(-)   | DDIT3     | chr12:56196638-56200567(-)   | 1649      | same      |
| mir-26a-2    | MI0000750 | chr12:56504659-56504742(-)   | CTDSP2    | chr12:56499977-56527014(-)   | 10106     | same      |
| mir-548c     | MI0003630 | chr12:63302556-63302652(+)   | RASSF3    | chr12:63290560-63375459(+)   | 283349    | same      |
| mir-1252     | MI0006434 | chr12:78337168-78337232(+)   | SYT1      | chr12:78135414-78368974(+)   | 6857      | same      |
| mir-617      | MI0003631 | chr12:79750443-79750539(-)   | LIN7A     | chr12:79715302-79855825(-)   | 8825      | same      |
| mir-618      | MI0003632 | chr12:79853646-79853743(-)   | LIN7A     | chr12:79715302-79855825(-)   | 8825      | same      |
| mir-1244     | MI0006379 | chr12:9283330-9283414(-)     | PTMAP4    | chr12:9283130-9284415(-)     | 5761      | same      |
| mir-492      | MI0003131 | chr12:93752305-93752420(+)   | KRT19P2   | chr12:93752331-93752965(+)   | 160313    | same      |
| mir-1267     | MI0006404 | chr13:106981520-106981597(-) | FAM155A   | chr13:106618880-107317084(-) | 728215    | same      |
| mir-621      | MI0003635 | chr13:40282902-40282997(+)   | SUGT1L1   | chr13:40269127-40393886(-)   | 283507    | different |
| mir-16-1     | MI0000070 | chr13:49521110-49521198(-)   | DLEU2     | chr13:49454689-49597678(-)   | 8847      | same      |
| mir-15a      | MI0000069 | chr13:49521256-49521338(-)   | DLEU2     | chr13:49454689-49597678(-)   | 8847      | same      |
| mir-622      | MI0003636 | chr13:89681437-89681532(+)   | KRT18P27  | chr13:89680636-89681937(+)   | 390418    | same      |
| mir-623      | MI0003637 | chr13:98806386-98806483(+)   | UBAC2     | chr13:98651164-98836682(+)   | 337867    | same      |
| mir-770      | MI0005118 | chr14:100388480-100388577(+) | MEG3      | chr14:100362198-100397121(+) | 55384     | same      |
| mir-431      | MI0001721 | chr14:100417097-100417210(+) | RTL1      | chr14:100416802-100420878(-) | 388015    | different |
| mir-433      | MI0001723 | chr14:100417976-100418068(+) | RTL1      | chr14:100416802-100420878(-) | 388015    | different |
| mir-127      | MI0000472 | chr14:100419069-100419165(+) | RTL1      | chr14:100416802-100420878(-) | 388015    | different |
| mir-432      | MI0003133 | chr14:100420573-100420666(+) | RTL1      | chr14:100416802-100420878(-) | 388015    | different |
| mir-136      | MI0000475 | chr14:100420792-100420873(+) | RTL1      | chr14:100416802-100420878(-) | 388015    | different |
| mir-1201     | MI0006333 | chr14:19864446-19864530(-)   | CCNB1IP1  | chr14:19849369-19871297(-)   | 57820     | same      |
| mir-208a     | MI0000251 | chr14:22927645-22927715(-)   | MYH6      | chr14:22921039-22947322(-)   | 4624      | same      |
| mir-208b     | MI0005570 | chr14:22957036-22957112(-)   | MYH7      | chr14:22951787-22974710(-)   | 4625      | same      |
| mir-624      | MI0003638 | chr14:30553603-30553699(-)   | STRN3     | chr14:30432756-30565358(-)   | 29966     | same      |
| mir-548h-1   | MI0006411 | chr14:63631495-63631596(-)   | SYNE2     | chr14:63389436-63762920(+)   | 23224     | different |
| mir-625      | MI0003639 | chr14:65007573-65007657(+)   | FUT8      | chr14:64947593-65279715(+)   | 2530      | same      |
| mir-1260     | MI0006394 | chr14:76802314-76802386(+)   | NGB       | chr14:76801587-76807408(-)   | 58157     | different |
| mir-342      | MI0000805 | chr14:99645745-99645843(+)   | EVL       | chr14:99601504-99680326(+)   | 51466     | same      |
| mir-211      | MI0000287 | chr15:29144527-29144636(-)   | TRPM1     | chr15:29080829-29181216(-)   | 4308      | same      |
| mir-1233     | MI0006323 | chr15:32461562-32461643(-)   | GOLGA8A   | chr15:32458561-32487180(-)   | 23015     | same      |

Supplemental Table 1: A list of pre-miRNA host genes

| pre-miRNA ID | MI ID     | pre-miRNA location (hg18)  | Host gene    | Host gene location (hg18)  | Entrez ID | Direction |
|--------------|-----------|----------------------------|--------------|----------------------------|-----------|-----------|
| mir-1233     | MI0006323 | chr15:32607783-32607864(-) | GOLGA8B      | chr15:32604588-32613203(-) | 440270    | same      |
| mir-626      | MI0003640 | chr15:39771075-39771168(+) | MGA          | chr15:39739902-39849433(+) | 23269     | same      |
| mir-627      | MI0003641 | chr15:40279060-40279156(-) | VPS39        | chr15:40238191-40287794(-) | 23339     | same      |
| mir-1282     | MI0006429 | chr15:41873149-41873249(-) | SERF2        | chr15:41871769-41875579(+) | 10169     | different |
| mir-147b     | MI0005544 | chr15:43512540-43512619(+) | C15orf48     | chr15:43510055-43512939(+) | 84419     | same      |
| mir-1266     | MI0006403 | chr15:50356606-50356689(-) | MYO5C        | chr15:50271811-50375262(-) | 55930     | same      |
| mir-1300     | MI0006360 | chr15:51017859-51017946(-) | LOC645693    | chr15:51016334-51018048(-) | 645693    | same      |
| mir-628      | MI0003642 | chr15:53452430-53452524(-) | CCPG1        | chr15:53434730-53487866(-) | 9236      | same      |
| mir-190      | MI0000486 | chr15:60903209-60903293(+) | TLN2         | chr15:60726802-60923883(+) | 83660     | same      |
| mir-1272     | MI0006408 | chr15:62841639-62841767(-) | RBPMS2       | chr15:62819146-62854823(-) | 348093    | same      |
| mir-629      | MI0003643 | chr15:68158765-68158861(-) | TLE3         | chr15:68127597-68177310(-) | 7090      | same      |
| mir-631      | MI0003645 | chr15:73433005-73433079(-) | NEIL1        | chr15:73426463-73434641(+) | 79661     | different |
| mir-184      | MI0000481 | chr15:77289185-77289268(+) | LOC729911    | chr15:77271368-77363268(-) | 729911    | different |
| mir-549      | MI0003679 | chr15:78921374-78921469(-) | KIAA1199     | chr15:78858767-79031054(+) | 57214     | different |
| mir-1276     | MI0006416 | chr15:84114731-84114813(-) | KLHL25       | chr15:84103561-84139193(-) | 64410     | same      |
| mir-1469     | MI0007074 | chr15:94677494-94677540(+) | NR2F2        | chr15:94674950-94683048(+) | 7026      | same      |
| mir-193b     | MI0003137 | chr16:14305325-14305407(+) | LOC100129781 | chr16:14294512-14327875(+) | 100129781 | same      |
| mir-365-1    | MI0000767 | chr16:14310643-14310729(+) | LOC100129781 | chr16:14294512-14327875(+) | 100129781 | same      |
| mir-1972     | MI0009982 | chr16:15011679-15011755(-) | PDXDC1       | chr16:14976487-15039690(+) | 23042     | different |
| mir-1225     | MI0006311 | chr16:2080197-2080286(-)   | PKD1         | chr16:2078712-2125900(-)   | 5310      | same      |
| mir-328      | MI0000804 | chr16:65793725-65793799(-) | ELMO3        | chr16:65790529-65795428(+) | 79767     | different |
| mir-1538     | MI0007259 | chr16:68157212-68157272(-) | NFAT5        | chr16:68156498-68296054(+) | 10725     | different |
| mir-140      | MI0000456 | chr16:68524485-68524584(+) | WWP2         | chr16:68353775-68533144(+) | 11060     | same      |
| mir-1972     | MI0009982 | chr16:68621750-68621826(+) | PDXDC2       | chr16:68567701-68657352(-) | 283970    | different |
| mir-662      | MI0003670 | chr16:760184-760278(+)     | MSLNL        | chr16:759429-772927(-)     | 401827    | different |
| mir-1910     | MI0008331 | chr16:84332728-84332807(-) | C16orf74     | chr16:84298624-84342190(-) | 404550    | same      |
| mir-744      | MI0005559 | chr17:11925941-11926038(+) | MAP2K4       | chr17:11864860-11987776(+) | 6416      | same      |
| mir-548h-3   | MI0006413 | chr17:13387571-13387688(-) | HS3ST3A1     | chr17:13339731-13445969(-) | 9955      | same      |
| mir-22       | MI0000078 | chr17:1563947-1564031(-)   | C17orf91     | chr17:1561553-1566255(-)   | 84981     | same      |
| mir-1288     | MI0006432 | chr17:16126053-16126127(+) | PIGL         | chr17:16061234-16170298(+) | 9487      | same      |
| mir-33b      | MI0003646 | chr17:17657875-17657970(-) | SREBF1       | chr17:17656111-17681050(-) | 6720      | same      |
| mir-1180     | MI0006273 | chr17:19188412-19188480(-) | B9D1         | chr17:19187076-19206639(-) | 27077     | same      |
| mir-423      | MI0001445 | chr17:25468223-25468316(+) | CCDC55       | chr17:25467960-25537612(+) | 84081     | same      |
| mir-365-2    | MI0000769 | chr17:26926543-26926653(+) | LOC100130112 | chr17:26922280-26926791(+) | 100130112 | same      |
| mir-632      | MI0003647 | chr17:27701241-27701334(+) | ZNF207       | chr17:27701270-27721581(+) | 7756      | same      |
| mir-923      | MI0005715 | chr17:30502292-30502346(-) | UNC45B       | chr17:30498949-30540477(+) | 146862    | different |
| mir-152      | MI0000462 | chr17:43469526-43469612(-) | COPZ2        | chr17:43458532-43470151(-) | 51226     | same      |

**Supplemental Table 1: A list of pre-miRNA host genes**

| <b>pre-miRNA ID</b> | <b>MI ID</b> | <b>pre-miRNA location (hg18)</b> | <b>Host gene</b> | <b>Host gene location (hg18)</b> | <b>Entrez ID</b> | <b>Direction</b> |
|---------------------|--------------|----------------------------------|------------------|----------------------------------|------------------|------------------|
| mir-1203            | MI0006335    | chr17:43588788-43588872(-)       | SKAP1            | chr17:43565801-43862593(-)       | 8631             | same             |
| mir-454             | MI0003820    | chr17:54569901-54570015(-)       | FAM33A           | chr17:54542090-54587582(-)       | 348235           | same             |
| mir-301a            | MI0000745    | chr17:54583279-54583364(-)       | FAM33A           | chr17:54542090-54587582(-)       | 348235           | same             |
| mir-634             | MI0003649    | chr17:62213652-62213748(+)       | PRKCA            | chr17:61729388-62237324(+)       | 5578             | same             |
| mir-548d-2          | MI0003671    | chr17:62898067-62898163(-)       | PITPNC1          | chr17:62804386-63120109(+)       | 26207            | different        |
| mir-635             | MI0003650    | chr17:63932187-63932284(-)       | WIPI1            | chr17:63929017-63965248(-)       | 55062            | same             |
| mir-324             | MI0000813    | chr17:7067340-7067422(-)         | ACADVL           | chr17:7063877-7069309(+)         | 37               | different        |
| mir-636             | MI0003651    | chr17:72244127-72244225(-)       | SFRS2            | chr17:72241792-72245007(-)       | 6427             | same             |
| mir-657             | MI0003681    | chr17:76713671-76713768(-)       | AATK             | chr17:76705160-76721740(-)       | 9625             | same             |
| mir-338             | MI0000814    | chr17:76714278-76714344(-)       | AATK             | chr17:76705160-76721740(-)       | 9625             | same             |
| mir-1250            | MI0006385    | chr17:76721591-76721703(-)       | AATK             | chr17:76705160-76721740(-)       | 9625             | same             |
| mir-320c-1          | MI0003778    | chr18:17517469-17517556(+)       | ABHD3            | chr18:17484856-17538724(-)       | 171586           | different        |
| mir-133a-1          | MI0000450    | chr18:17659657-17659744(-)       | MIB1             | chr18:17575543-17704912(+)       | 57534            | different        |
| mir-1-2             | MI0000437    | chr18:17662963-17663047(-)       | MIB1             | chr18:17575543-17704912(+)       | 57534            | different        |
| mir-320c-2          | MI0008191    | chr18:20155648-20155697(+)       | OSBPL1A          | chr18:19996007-20231788(-)       | 114876           | different        |
| mir-1181            | MI0006274    | chr19:10375134-10375214(-)       | CDC37            | chr19:10362809-10375271(-)       | 11140            | same             |
| mir-1238            | MI0006328    | chr19:10523798-10523880(+)       | ATG4D            | chr19:10515647-10525094(+)       | 84971            | same             |
| mir-638             | MI0003653    | chr19:10690080-10690179(+)       | DNM2             | chr19:10689755-10803579(+)       | 1785             | same             |
| mir-199a-1          | MI0000242    | chr19:10789102-10789172(-)       | DNM2             | chr19:10689755-10803579(+)       | 1785             | different        |
| mir-639             | MI0003654    | chr19:14501355-14501452(+)       | GPSN2            | chr19:14501382-14537792(+)       | 9524             | same             |
| mir-1470            | MI0007075    | chr19:15421359-15421419(+)       | WIZ              | chr19:15393318-15421762(-)       | 58525            | different        |
| mir-1909            | MI0008330    | chr19:1767158-1767237(-)         | REXO1            | chr19:1766245-1799452(-)         | 57455            | same             |
| mir-1270            | MI0006407    | chr19:20371080-20371162(-)       | ZNF826           | chr19:20367763-20399602(-)       | 664701           | same             |
| mir-1227            | MI0006316    | chr19:2185061-2185148(-)         | PLEKHJ1          | chr19:2184155-2187328(-)         | 55111            | same             |
| mir-1302-2          | MI0006363    | chr19:22973-23110(+)             | LOC100132098     | chr19:18265-28430(-)             | 100132098        | different        |
| mir-637             | MI0003652    | chr19:3912412-3912510(-)         | DAPK3            | chr19:3909452-3920826(-)         | 1613             | same             |
| mir-641             | MI0003656    | chr19:45480290-45480388(-)       | AKT2             | chr19:45428064-45483105(-)       | 208              | same             |
| mir-7-3             | MI0000265    | chr19:4721682-4721791(+)         | C19orf30         | chr19:4720152-4723570(+)         | 284424           | same             |
| mir-330             | MI0000803    | chr19:50834092-50834185(-)       | EML2             | chr19:50804498-50834509(-)       | 24139            | same             |
| mir-642             | MI0003657    | chr19:50870026-50870122(+)       | GIPR             | chr19:50863342-50877557(+)       | 2696             | same             |
| mir-220c            | MI0005536    | chr19:53755341-53755423(-)       | SULT2B1          | chr19:53747241-53794496(+)       | 6820             | different        |
| mir-150             | MI0000479    | chr19:54695854-54695937(-)       | LOC100128528     | chr19:54695593-54696426(+)       | 100128528        | different        |
| mir-643             | MI0003658    | chr19:57476862-57476958(+)       | ZNF766           | chr19:57464636-57487788(+)       | 90321            | same             |
| mir-519a-2          | MI0003182    | chr19:58957410-58957496(+)       | LOC100128255     | chr19:58957271-58957715(+)       | 100128255        | same             |
| mir-935             | MI0005757    | chr19:59177373-59177463(+)       | CACNG8           | chr19:59158106-59177951(+)       | 59283            | same             |
| mir-220b            | MI0005529    | chr19:6446959-6447045(+)         | TUBB4            | chr19:6445330-6453330(-)         | 10382            | different        |
| mir-663b            | MI0006336    | chr2:132731009-132731123(-)      | LOC100133239     | chr2:132726444-132733571(+)      | 100133239        | different        |

Supplemental Table 1: A list of pre-miRNA host genes

| pre-miRNA ID | MI ID     | pre-miRNA location (hg18)   | Host gene    | Host gene location (hg18)   | Entrez ID | Direction |
|--------------|-----------|-----------------------------|--------------|-----------------------------|-----------|-----------|
| mir-128-1    | MI0000447 | chr2:136139437-136139518(+) | R3HDM1       | chr2:136005553-136199309(+) | 23518     | same      |
| mir-933      | MI0005755 | chr2:175740607-175740683(-) | ATF2         | chr2:175647252-175741143(-) | 1386      | same      |
| mir-1258     | MI0006392 | chr2:180433808-180433880(-) | ZNF385B      | chr2:180014954-180434312(-) | 151126    | same      |
| mir-561      | MI0003567 | chr2:188870464-188870560(+) | GULP1        | chr2:188865635-189168898(+) | 51454     | same      |
| mir-1245     | MI0006380 | chr2:189551063-189551132(+) | COL3A1       | chr2:189547344-189585717(+) | 1281      | same      |
| mir-1302-4   | MI0006365 | chr2:207842244-207842393(-) | LOC729607    | chr2:207812833-207884544(-) | 729607    | same      |
| mir-548f-2   | MI0006375 | chr2:212999232-212999329(-) | ERBB4        | chr2:211948687-213111597(-) | 2066      | same      |
| mir-26b      | MI0000084 | chr2:218975613-218975689(+) | CTDSP1       | chr2:218972722-218978908(+) | 58190     | same      |
| mir-375      | MI0000783 | chr2:219574611-219574674(-) | LOC100129175 | chr2:219572079-219588688(+) | 100129175 | different |
| mir-153-1    | MI0000463 | chr2:219867077-219867166(-) | PTPRN        | chr2:219862589-219882387(-) | 5798      | same      |
| mir-1244     | MI0006379 | chr2:232286268-232286352(+) | PTMA         | chr2:232281479-232286495(+) | 5757      | same      |
| mir-562      | MI0003568 | chr2:232745607-232745701(+) | DIS3L2       | chr2:232534537-232910152(+) | 129563    | same      |
| mir-149      | MI0000478 | chr2:241044091-241044179(+) | GPC1         | chr2:241023788-241056168(+) | 2817      | same      |
| mir-149      | MI0000478 | chr2:241044091-241044179(+) | PP14571      | chr2:241037500-241044804(-) | 100130449 | different |
| mir-1301     | MI0003815 | chr2:25405013-25405094(-)   | DNMT3A       | chr2:25309349-25418963(-)   | 1788      | same      |
| mir-558      | MI0003564 | chr2:32610724-32610817(+)   | BIRC6        | chr2:32435600-32697470(+)   | 57448     | same      |
| mir-559      | MI0003565 | chr2:47458318-47458413(+)   | EPCAM        | chr2:47449971-47467661(+)   | 4072      | same      |
| mir-1292     | MI0006433 | chr20:2581423-2581488(+)    | NOP56        | chr20:2581254-2587039(+)    | 10528     | same      |
| mir-663      | MI0003672 | chr20:26136822-26136914(-)  | LOC284801    | chr20:26115655-26137445(-)  | 284801    | same      |
| mir-1825     | MI0008193 | chr20:30289259-30289311(+)  | POFUT1       | chr20:30259357-30290128(+)  | 23509     | same      |
| mir-644      | MI0003659 | chr20:32517791-32517884(+)  | ITCH         | chr20:32414745-32562858(+)  | 83737     | same      |
| mir-499      | MI0003183 | chr20:33041840-33041961(+)  | MYH7B        | chr20:33026867-33053897(+)  | 57644     | same      |
| mir-103-2    | MI0000108 | chr20:3846141-3846218(+)    | PANK2        | chr20:3817486-3852502(+)    | 80025     | same      |
| mir-103-2-as | MI0007262 | chr20:3846149-3846210(-)    | PANK2        | chr20:3817486-3852502(+)    | 80025     | different |
| mir-1259     | MI0006393 | chr20:47330254-47330364(+)  | C20orf199    | chr20:47310234-47339204(+)  | 441951    | same      |
| mir-1302-5   | MI0006366 | chr20:48664580-48664729(-)  | FAM65C       | chr20:48636052-48686833(-)  | 140876    | same      |
| mir-646      | MI0003661 | chr20:58316927-58317020(+)  | LOC100131710 | chr20:58148235-58339985(+)  | 100131710 | same      |
| mir-1-1      | MI0000651 | chr20:60561958-60562028(+)  | C20orf166    | chr20:60558105-60578409(+)  | 128826    | same      |
| mir-133a-2   | MI0000451 | chr20:60572564-60572665(+)  | C20orf166    | chr20:60558105-60578409(+)  | 128826    | same      |
| mir-941-1    | MI0005763 | chr20:62021238-62021326(+)  | DNAJC5       | chr20:61996962-62035839(+)  | 80331     | same      |
| mir-941-2    | MI0005764 | chr20:62021545-62021633(+)  | DNAJC5       | chr20:61996962-62035839(+)  | 80331     | same      |
| mir-941-3    | MI0005765 | chr20:62021657-62021745(+)  | DNAJC5       | chr20:61996962-62035839(+)  | 80331     | same      |
| mir-1914     | MI0008335 | chr20:62043262-62043341(-)  | UCKL1        | chr20:62041630-62058212(-)  | 54963     | same      |
| mir-647      | MI0003662 | chr20:62044428-62044523(-)  | UCKL1        | chr20:62041630-62058212(-)  | 54963     | same      |
| mir-99a      | MI0000101 | chr21:16833280-16833360(+)  | C21orf34     | chr21:16364713-16901413(+)  | 388815    | same      |
| let-7c       | MI0000064 | chr21:16834019-16834102(+)  | C21orf34     | chr21:16364713-16901413(+)  | 388815    | same      |
| mir-125b-2   | MI0000470 | chr21:16884428-16884516(+)  | C21orf34     | chr21:16364713-16901413(+)  | 388815    | same      |

Supplemental Table 1: A list of pre-miRNA host genes

| pre-miRNA ID | MI ID     | pre-miRNA location (hg18)   | Host gene | Host gene location (hg18)   | Entrez ID | Direction |
|--------------|-----------|-----------------------------|-----------|-----------------------------|-----------|-----------|
| mir-155      | MI0000681 | chr21:25868163-25868227(+)  | MIRHG2    | chr21:25856376-25869344(+)  | 114614    | same      |
| mir-185      | MI0000482 | chr22:18400662-18400743(+)  | C22orf25  | chr22:18388631-18433447(+)  | 128989    | same      |
| mir-1306     | MI0006443 | chr22:18453581-18453665(+)  | DGCR8     | chr22:18447834-18479400(+)  | 54487     | same      |
| mir-1286     | MI0006348 | chr22:18616657-18616734(-)  | RTN4R     | chr22:18608938-18635816(-)  | 65078     | same      |
| mir-650      | MI0003665 | chr22:21495270-21495365(+)  | IGL@      | chr22:20710659-21595085(+)  | 3535      | same      |
| mir-548j     | MI0006345 | chr22:25281178-25281289(-)  | TPST2     | chr22:25251714-25316089(-)  | 8459      | same      |
| mir-548j     | MI0006345 | chr22:25281178-25281289(-)  | HMGB1L10  | chr22:25275760-25287594(+)  | 100130561 | different |
| mir-658      | MI0003682 | chr22:36570225-36570324(-)  | ANKRD54   | chr22:36556808-36570249(-)  | 129138    | same      |
| mir-33a      | MI0000091 | chr22:40626894-40626962(+)  | SREBF2    | chr22:40559052-40632321(+)  | 6721      | same      |
| mir-1249     | MI0006384 | chr22:43975499-43975564(-)  | C22orf9   | chr22:43966787-44015314(-)  | 23313     | same      |
| mir-885      | MI0005560 | chr3:10411173-10411246(-)   | ATP2B2    | chr3:10342744-10466546(-)   | 491       | same      |
| mir-567      | MI0003573 | chr3:113314338-113314435(+) | C3orf52   | chr3:113287929-113319734(+) | 79669     | same      |
| mir-198      | MI0000240 | chr3:121597205-121597266(-) | FSTL1     | chr3:121595816-121652515(-) | 11167     | same      |
| mir-1280     | MI0006437 | chr3:129563698-129563791(+) | EEFSEC    | chr3:129355003-129610179(+) | 60678     | same      |
| mir-15b      | MI0000438 | chr3:161605070-161605167(+) | SMC4      | chr3:161600124-161635435(+) | 10051     | same      |
| mir-16-2     | MI0000115 | chr3:161605227-161605307(+) | SMC4      | chr3:161600124-161635435(+) | 10051     | same      |
| mir-569      | MI0003576 | chr3:172307147-172307242(-) | TNIK      | chr3:172264364-172660546(-) | 23043     | same      |
| mir-1224     | MI0003764 | chr3:185441887-185441971(+) | VWA5B2    | chr3:185431011-185442814(+) | 90113     | same      |
| mir-1248     | MI0006383 | chr3:187987155-187987260(+) | EIF4A2    | chr3:187984055-187990380(+) | 1974      | same      |
| mir-28       | MI0000086 | chr3:189889263-189889348(+) | LPP       | chr3:189413415-190080135(+) | 4026      | same      |
| mir-944      | MI0005769 | chr3:191030405-191030492(+) | TP63      | chr3:190831910-191097759(+) | 8626      | same      |
| mir-922      | MI0005714 | chr3:198885764-198885844(-) | KIAA0226  | chr3:198882656-198948170(-) | 9711      | same      |
| mir-128-2    | MI0000727 | chr3:35760972-35761055(+)   | ARPP-21   | chr3:35658853-35810992(+)   | 10777     | same      |
| mir-26a-1    | MI0000083 | chr3:37985899-37985975(+)   | CTDSPL    | chr3:37878673-38000964(+)   | 10217     | same      |
| mir-564      | MI0003570 | chr3:44878384-44878477(+)   | TMEM42    | chr3:44878412-44882160(+)   | 131616    | same      |
| mir-1226     | MI0006313 | chr3:47866049-47866123(+)   | DHX30     | chr3:47819655-47866687(+)   | 22907     | same      |
| mir-425      | MI0001448 | chr3:49032585-49032671(-)   | DALRD3    | chr3:49027439-49033471(-)   | 55152     | same      |
| mir-191      | MI0000465 | chr3:49033055-49033146(-)   | NDUFAF3   | chr3:49032912-49035932(+)   | 25915     | different |
| mir-191      | MI0000465 | chr3:49033055-49033146(-)   | DALRD3    | chr3:49027439-49033471(-)   | 55152     | same      |
| mir-566      | MI0003572 | chr3:50185763-50185856(+)   | SEMA3F    | chr3:50167852-50201512(+)   | 6405      | same      |
| let-7g       | MI0000433 | chr3:52277334-52277417(-)   | WDR82     | chr3:52263478-52287699(-)   | 80335     | same      |
| mir-1284     | MI0006431 | chr3:71673811-71673930(-)   | FOXP1     | chr3:71087426-71715830(-)   | 27086     | same      |
| mir-1255a    | MI0006389 | chr4:102470482-102470594(-) | PPP3CA    | chr4:102163610-102487376(-) | 5530      | same      |
| mir-572      | MI0003579 | chr4:10979549-10979643(+)   | LOC643446 | chr4:10972081-10984486(+)   | 643446    | same      |
| mir-576      | MI0003583 | chr4:110629303-110629400(+) | SEC24B    | chr4:110574420-110681064(+) | 10427     | same      |
| mir-367      | MI0000775 | chr4:113788479-113788546(-) | LARP7     | chr4:113777569-113798191(+) | 51574     | different |
| mir-302d     | MI0000774 | chr4:113788609-113788676(-) | LARP7     | chr4:113777569-113798191(+) | 51574     | different |

Supplemental Table 1: A list of pre-miRNA host genes

| pre-miRNA ID | MI ID     | pre-miRNA location (hg18)   | Host gene | Host gene location (hg18)   | Entrez ID | Direction |
|--------------|-----------|-----------------------------|-----------|-----------------------------|-----------|-----------|
| mir-302a     | MI0000738 | chr4:113788788-113788856(-) | LARP7     | chr4:113777569-113798191(+) | 51574     | different |
| mir-302c     | MI0000773 | chr4:113788968-113789035(-) | LARP7     | chr4:113777569-113798191(+) | 51574     | different |
| mir-302b     | MI0000772 | chr4:113789090-113789162(-) | LARP7     | chr4:113777569-113798191(+) | 51574     | different |
| mir-1243     | MI0006373 | chr4:114247468-114247560(+) | ANK2      | chr4:114190319-114524337(+) | 287       | same      |
| mir-577      | MI0003584 | chr4:115797364-115797459(+) | UGT8      | chr4:115762972-115817201(+) | 7368      | same      |
| mir-578      | MI0003585 | chr4:166526844-166526939(+) | CPE       | chr4:166519538-166638926(+) | 1363      | same      |
| mir-1979     | MI0009989 | chr4:166541264-166541339(-) | CPE       | chr4:166519538-166638926(+) | 1363      | different |
| mir-943      | MI0005768 | chr4:1957909-1958002(-)     | WHSC2     | chr4:1954248-1980547(-)     | 7469      | same      |
| mir-218-1    | MI0000294 | chr4:20138996-20139105(+)   | SLIT2     | chr4:19864333-20229886(+)   | 9353      | same      |
| mir-571      | MI0003578 | chr4:333946-334041(+)       | ZNF141    | chr4:321617-359047(+)       | 7700      | same      |
| mir-574      | MI0003581 | chr4:38546048-38546143(+)   | FAM114A1  | chr4:38545832-38621823(+)   | 92689     | same      |
| mir-95       | MI0000097 | chr4:8057928-8058008(-)     | ABLIM2    | chr4:8017938-8211459(-)     | 84448     | same      |
| mir-575      | MI0003582 | chr4:83893514-83893607(-)   | SCD5      | chr4:83769714-83939034(-)   | 79966     | same      |
| mir-548p     | MI0006420 | chr5:100180085-100180168(-) | ST8SIA4   | chr5:100170803-100266869(-) | 7903      | same      |
| mir-548f-3   | MI0006376 | chr5:109877429-109877515(-) | FLJ43080  | chr5:109784099-110090288(-) | 642987    | same      |
| mir-1244     | MI0006379 | chr5:118338180-118338264(+) | PTMAP2    | chr5:118337007-118338520(+) | 5759      | same      |
| mir-1244     | MI0006379 | chr5:118338180-118338264(+) | DTWD2     | chr5:118203135-118352139(-) | 285605    | different |
| mir-1289-2   | MI0006351 | chr5:132791187-132791297(-) | FSTL4     | chr5:132560051-132976122(-) | 23105     | same      |
| mir-874      | MI0005532 | chr5:137011160-137011237(-) | KLHL3     | chr5:136981088-137099362(-) | 26249     | same      |
| mir-584      | MI0003591 | chr5:148422069-148422165(-) | SH3TC2    | chr5:148341906-148422930(-) | 79628     | same      |
| mir-143      | MI0000459 | chr5:148788674-148788779(+) | LOC728264 | chr5:148743536-148790387(+) | 728264    | same      |
| mir-378      | MI0000786 | chr5:149092581-149092646(+) | PPARGC1B  | chr5:149090057-149207474(+) | 133522    | same      |
| mir-1294     | MI0006356 | chr5:153706859-153707000(+) | GALNT10   | chr5:153550488-153780003(+) | 55568     | same      |
| mir-887      | MI0005562 | chr5:15988291-15988369(+)   | FBXL7     | chr5:15553305-15992900(+)   | 23194     | same      |
| mir-103-1    | MI0000109 | chr5:167920479-167920556(-) | PANK3     | chr5:167915208-167939166(-) | 79646     | same      |
| mir-103-1-as | MI0007261 | chr5:167920487-167920548(+) | PANK3     | chr5:167915208-167939166(-) | 79646     | different |
| mir-218-2    | MI0000295 | chr5:168127729-168127838(-) | SLIT3     | chr5:168025857-168660554(-) | 6586      | same      |
| mir-585      | MI0003592 | chr5:168623183-168623276(-) | SLIT3     | chr5:168025857-168660554(-) | 6586      | same      |
| mir-1271     | MI0003814 | chr5:175727555-175727640(+) | ARL10     | chr5:175725108-175733109(+) | 285598    | same      |
| mir-1229     | MI0006319 | chr5:179157884-179157952(-) | MGAT4B    | chr5:179156711-179166547(-) | 11282     | same      |
| mir-340      | MI0000802 | chr5:179374909-179375003(-) | RNF130    | chr5:179315080-179431715(-) | 55819     | same      |
| mir-579      | MI0003586 | chr5:32430241-32430338(-)   | ZFR       | chr5:32390213-32480601(-)   | 51663     | same      |
| mir-580      | MI0003587 | chr5:36183751-36183847(-)   | LMBRD2    | chr5:36139171-36187772(-)   | 92255     | same      |
| mir-1274a    | MI0006410 | chr5:41511491-41511561(+)   | PLCXD3    | chr5:41342805-41546487(-)   | 345557    | different |
| mir-581      | MI0003588 | chr5:53283091-53283186(-)   | ARL15     | chr5:53216371-53642160(-)   | 54622     | same      |
| mir-449a     | MI0001648 | chr5:54502117-54502207(-)   | CDC20B    | chr5:54444580-54504760(-)   | 166979    | same      |
| mir-449b     | MI0003673 | chr5:54502231-54502327(-)   | CDC20B    | chr5:54444580-54504760(-)   | 166979    | same      |



Supplemental Table 1: A list of pre-miRNA host genes

| pre-miRNA ID | MI ID     | pre-miRNA location (hg18)   | Host gene    | Host gene location (hg18)   | Entrez ID | Direction |
|--------------|-----------|-----------------------------|--------------|-----------------------------|-----------|-----------|
| mir-582      | MI0003589 | chr5:59035189-59035286(-)   | PDE4D        | chr5:58300622-59225378(-)   | 5144      | same      |
| mir-9-2      | MI0000467 | chr5:87998427-87998513(-)   | LOC645323    | chr5:87871743-88010012(-)   | 645323    | same      |
| mir-1974     | MI0009984 | chr5:93930928-93930997(-)   | C5orf36      | chr5:93880919-93980040(-)   | 285600    | same      |
| mir-583      | MI0003590 | chr5:95440598-95440672(+)   | LOC441097    | chr5:95410406-95577074(+)   | 441097    | same      |
| mir-548b     | MI0003596 | chr6:119431911-119432007(-) | FAM184A      | chr6:119322694-119512057(-) | 79632     | same      |
| mir-1913     | MI0008334 | chr6:166842832-166842911(-) | RPS6KA2      | chr6:166742844-167195761(-) | 6196      | same      |
| mir-877      | MI0005561 | chr6:30660088-30660173(+)   | ABCF1        | chr6:30647149-30667288(+)   | 23        | same      |
| mir-1236     | MI0006326 | chr6:32032595-32032696(-)   | RDBP         | chr6:32027843-32034843(-)   | 7936      | same      |
| mir-586      | MI0003594 | chr6:45273389-45273485(-)   | SUPT3H       | chr6:44904447-45453648(-)   | 8464      | same      |
| mir-548o     | MI0006402 | chr7:101833194-101833307(-) | PRKRIP1      | chr7:101823809-101854134(+) | 79706     | different |
| mir-339      | MI0000815 | chr7:1029095-1029188(-)     | C7orf50      | chr7:1003168-1144360(-)     | 84310     | same      |
| mir-592      | MI0003604 | chr7:126485378-126485474(-) | GRM8         | chr7:125865895-126670548(-) | 2918      | same      |
| mir-593      | MI0003605 | chr7:127509149-127509248(+) | SND1         | chr7:127079438-127519895(+) | 27044     | same      |
| mir-129-1    | MI0000252 | chr7:127635161-127635232(+) | LOC100131212 | chr7:127634102-127651720(+) | 100131212 | same      |
| mir-335      | MI0000816 | chr7:129923188-129923281(+) | MEST         | chr7:129913282-129933369(+) | 4232      | same      |
| mir-490      | MI0003125 | chr7:136238454-136238581(+) | CHRM2        | chr7:136203939-136352311(+) | 1129      | same      |
| mir-548f-4   | MI0006377 | chr7:146706042-146706146(-) | CNTNAP2      | chr7:145444386-147749019(+) | 26047     | different |
| mir-1975     | MI0009985 | chr7:148269513-148269587(+) | RNY5         | chr7:148269011-148269818(+) | 6090      | same      |
| mir-671      | MI0003760 | chr7:150566440-150566557(+) | CSGLCA-T     | chr7:150560518-150566838(+) | 54480     | same      |
| mir-153-2    | MI0000464 | chr7:157059789-157059875(-) | PTPRN2       | chr7:157024516-158073179(-) | 5799      | same      |
| mir-595      | MI0003607 | chr7:158018171-158018266(-) | PTPRN2       | chr7:157024516-158073179(-) | 5799      | same      |
| mir-1183     | MI0006276 | chr7:21477201-21477289(+)   | SP4          | chr7:21434214-21520687(+)   | 6671      | same      |
| mir-550-1    | MI0003600 | chr7:30295935-30296031(+)   | ZNRF2        | chr7:30290448-30373833(+)   | 223082    | same      |
| mir-548n     | MI0006399 | chr7:34946897-34946971(-)   | DPY19L1      | chr7:34935018-35044178(-)   | 23333     | same      |
| mir-1200     | MI0006332 | chr7:36925487-36925562(-)   | ELMO1        | chr7:36860486-37455036(-)   | 9844      | same      |
| mir-589      | MI0003599 | chr7:5501976-5502074(-)     | FBXL18       | chr7:5481954-5519925(-)     | 80028     | same      |
| mir-590      | MI0003602 | chr7:73243464-73243560(+)   | EIF4H        | chr7:73226642-73249365(+)   | 7458      | same      |
| mir-1285-1   | MI0006346 | chr7:91671265-91671348(-)   | KRIT1        | chr7:91666219-91713350(-)   | 889       | same      |
| mir-653      | MI0003674 | chr7:92950008-92950103(-)   | CALCR        | chr7:92891735-93041686(-)   | 799       | same      |
| mir-489      | MI0003124 | chr7:92951184-92951267(-)   | CALCR        | chr7:92891735-93041686(-)   | 799       | same      |
| mir-591      | MI0003603 | chr7:95686910-95687004(-)   | SLC25A13     | chr7:95587468-95789341(-)   | 10165     | same      |
| mir-25       | MI0000082 | chr7:99529119-99529202(-)   | MCM7         | chr7:99528340-99537363(-)   | 4176      | same      |
| mir-93       | MI0000095 | chr7:99529327-99529406(-)   | MCM7         | chr7:99528340-99537363(-)   | 4176      | same      |
| mir-106b     | MI0000734 | chr7:99529552-99529633(-)   | MCM7         | chr7:99528340-99537363(-)   | 4176      | same      |
| mir-599      | MI0003611 | chr8:100618040-100618134(-) | VPS13B       | chr8:100094670-100958984(+) | 157680    | different |
| mir-875      | MI0005541 | chr8:100618190-100618265(-) | VPS13B       | chr8:100094670-100958984(+) | 157680    | different |
| mir-1273     | MI0006409 | chr8:101105386-101105488(-) | RGS22        | chr8:101042452-101187520(-) | 26166     | same      |

Supplemental Table 1: A list of pre-miRNA host genes

| pre-miRNA ID | MI ID     | pre-miRNA location (hg18)   | Host gene    | Host gene location (hg18)   | Entrez ID | Direction |
|--------------|-----------|-----------------------------|--------------|-----------------------------|-----------|-----------|
| mir-1322     | MI0006653 | chr8:10720293-10720363(-)   | PINX1        | chr8:10660294-10734709(-)   | 54984     | same      |
| mir-598      | MI0003610 | chr8:10930126-10930222(-)   | XKR6         | chr8:10791064-11096285(-)   | 286046    | same      |
| mir-2053     | MI0010487 | chr8:113724898-113724988(+) | CSMD3        | chr8:113304333-114518418(-) | 114788    | different |
| mir-548d-1   | MI0003668 | chr8:124429455-124429551(-) | ATAD2        | chr8:124401922-124477868(-) | 29028     | same      |
| mir-1204     | MI0006337 | chr8:128877390-128877456(+) | PVT1         | chr8:128875961-129182681(+) | 5820      | same      |
| mir-1205     | MI0006338 | chr8:129042061-129042123(+) | PVT1         | chr8:128875961-129182681(+) | 5820      | same      |
| mir-1206     | MI0006339 | chr8:129090326-129090384(+) | PVT1         | chr8:128875961-129182681(+) | 5820      | same      |
| mir-1207     | MI0006340 | chr8:129130580-129130666(+) | PVT1         | chr8:128875961-129182681(+) | 5820      | same      |
| mir-151      | MI0000809 | chr8:141811845-141811934(-) | PTK2         | chr8:141737683-142080514(-) | 5747      | same      |
| mir-937      | MI0005759 | chr8:144967115-144967200(-) | SCRIB        | chr8:144945078-144969537(-) | 23513     | same      |
| mir-661      | MI0003669 | chr8:145091347-145091435(-) | PLEC1        | chr8:145061309-145121531(-) | 5339      | same      |
| mir-939      | MI0005761 | chr8:145590172-145590253(-) | CPSF1        | chr8:145589254-145605541(-) | 29894     | same      |
| mir-1234     | MI0006324 | chr8:145596284-145596367(-) | CPSF1        | chr8:145589254-145605541(-) | 29894     | same      |
| mir-383      | MI0000791 | chr8:14755318-14755390(-)   | SGCZ         | chr8:13991744-15140163(-)   | 137868    | same      |
| mir-486      | MI0002470 | chr8:41637116-41637183(-)   | ANK1         | chr8:41629901-41774297(-)   | 286       | same      |
| mir-2052     | MI0010486 | chr8:75780483-75780537(+)   | FLJ39080     | chr8:75674656-75833142(+)   | 441355    | same      |
| mir-597      | MI0003609 | chr8:9636592-9636688(+)     | TNKS         | chr8:9450855-9677266(+)     | 8658      | same      |
| mir-32       | MI0000090 | chr9:110848330-110848399(-) | C9orf5       | chr9:110817236-110922046(-) | 23731     | same      |
| mir-455      | MI0003513 | chr9:116011535-116011630(+) | COL27A1      | chr9:115958052-116112796(+) | 85301     | same      |
| mir-600      | MI0003613 | chr9:124913646-124913743(-) | C9orf45      | chr9:124911594-124916052(-) | 81571     | same      |
| mir-601      | MI0003614 | chr9:125204625-125204703(-) | DENND1A      | chr9:125181754-125732238(-) | 57706     | same      |
| mir-181a-2   | MI0000269 | chr9:126494542-126494651(+) | NR6A1        | chr9:126324524-126573397(-) | 2649      | different |
| mir-181b-2   | MI0000683 | chr9:126495810-126495898(+) | NR6A1        | chr9:126324524-126573397(-) | 2649      | different |
| mir-199b     | MI0000282 | chr9:130046821-130046930(-) | DNM1         | chr9:130005484-130057348(+) | 1759      | different |
| mir-126      | MI0000471 | chr9:138684875-138684959(+) | EGFL7        | chr9:138677198-138686951(+) | 51162     | same      |
| mir-491      | MI0003126 | chr9:20706104-20706187(+)   | KIAA1797     | chr9:20648309-20985954(+)   | 54914     | same      |
| mir-101-2    | MI0000739 | chr9:4840297-4840375(+)     | RCL1         | chr9:4782834-4851064(+)     | 10171     | same      |
| mir-101-2    | MI0000739 | chr9:4840297-4840375(+)     | LOC100129106 | chr9:4793788-4865982(-)     | 100129106 | different |
| mir-204      | MI0000284 | chr9:72614711-72614820(-)   | TRPM3        | chr9:72339769-72926334(-)   | 80036     | same      |
| mir-7-1      | MI0000263 | chr9:85774483-85774592(-)   | HNRNPK       | chr9:85772912-85785339(-)   | 3190      | same      |
| let-7d       | MI0000065 | chr9:95980937-95981023(+)   | LOC158257    | chr9:95978561-96061936(-)   | 158257    | different |
| mir-23b      | MI0000439 | chr9:96887311-96887407(+)   | C9orf3       | chr9:96528815-96889262(+)   | 84909     | same      |
| mir-27b      | MI0000440 | chr9:96887548-96887644(+)   | C9orf3       | chr9:96528815-96889262(+)   | 84909     | same      |
| mir-24-1     | MI0000080 | chr9:96888124-96888191(+)   | C9orf3       | chr9:96528815-96889262(+)   | 84909     | same      |
| mir-1302-8   | MI0006369 | chr9:99165657-99165784(-)   | KIAA1529     | chr9:99040600-99179390(+)   | 57653     | different |
| mir-1978     | MI0009988 | chrMT:622-674(+)            | RNR1         | chrMT:650-1603(+)           | 4549      | same      |
| mir-652      | MI0003667 | chrX:109185213-109185310(+) | TMEM164      | chrX:109133018-109303430(+) | 84187     | same      |

Supplemental Table 1: A list of pre-miRNA host genes

| pre-miRNA ID | MI ID     | pre-miRNA location (hg18)   | Host gene | Host gene location (hg18)   | Entrez ID | Direction |
|--------------|-----------|-----------------------------|-----------|-----------------------------|-----------|-----------|
| mir-1912     | MI0008333 | chrX:113792275-113792354(+) | HTR2C     | chrX:113724807-114050880(+) | 3358      | same      |
| mir-1264     | MI0003758 | chrX:113793386-113793454(+) | HTR2C     | chrX:113724807-114050880(+) | 3358      | same      |
| mir-1298     | MI0003938 | chrX:113855906-113856017(+) | HTR2C     | chrX:113724807-114050880(+) | 3358      | same      |
| mir-1911     | MI0008332 | chrX:113904000-113904079(+) | HTR2C     | chrX:113724807-114050880(+) | 3358      | same      |
| mir-448      | MI0001637 | chrX:113964273-113964383(+) | HTR2C     | chrX:113724807-114050880(+) | 3358      | same      |
| mir-1277     | MI0006419 | chrX:117404385-117404462(+) | WDR44     | chrX:117364070-117467952(+) | 54521     | same      |
| mir-766      | MI0003836 | chrX:118664729-118664839(-) | SEPT6     | chrX:118633715-118711361(-) | 23157     | same      |
| mir-220a     | MI0000297 | chrX:122523627-122523736(-) | LOC402422 | chrX:122519950-122524507(+) | 402422    | different |
| mir-19b-2    | MI0000075 | chrX:133131367-133131462(-) | LOC644403 | chrX:133131427-133167570(+) | 644403    | different |
| mir-20b      | MI0001519 | chrX:133131505-133131573(-) | LOC644403 | chrX:133131427-133167570(+) | 644403    | different |
| mir-18b      | MI0001518 | chrX:133131737-133131807(-) | LOC644403 | chrX:133131427-133167570(+) | 644403    | different |
| mir-106a     | MI0000113 | chrX:133131894-133131974(-) | LOC644403 | chrX:133131427-133167570(+) | 644403    | different |
| mir-503      | MI0003188 | chrX:133508024-133508094(-) | MGC16121  | chrX:133506122-133516164(-) | 84848     | same      |
| mir-424      | MI0001446 | chrX:133508310-133508407(-) | MGC16121  | chrX:133506122-133516164(-) | 84848     | same      |
| mir-934      | MI0005756 | chrX:135460703-135460785(+) | VGLL1     | chrX:135441977-135466629(+) | 51442     | same      |
| mir-504      | MI0003189 | chrX:137577538-137577620(-) | FGF13     | chrX:137541401-137649181(-) | 2258      | same      |
| mir-224      | MI0000301 | chrX:150877706-150877786(-) | GABRE     | chrX:150872252-150893807(-) | 2564      | same      |
| mir-452      | MI0001733 | chrX:150878756-150878840(-) | GABRE     | chrX:150872252-150893807(-) | 2564      | same      |
| mir-105-1    | MI0000111 | chrX:151311347-151311427(-) | GABRA3    | chrX:151086290-151370487(-) | 2556      | same      |
| mir-767      | MI0003763 | chrX:151312549-151312657(-) | GABRA3    | chrX:151086290-151370487(-) | 2556      | same      |
| mir-105-2    | MI0000112 | chrX:151313540-151313620(-) | GABRA3    | chrX:151086290-151370487(-) | 2556      | same      |
| mir-1184     | MI0006277 | chrX:153768829-153768927(-) | F8        | chrX:153717260-153904192(-) | 2157      | same      |
| mir-1184     | MI0006277 | chrX:153768829-153768927(-) | F8A1      | chrX:153767829-153769530(+) | 8263      | different |
| mir-1184     | MI0006277 | chrX:154265943-154266041(-) | F8A2      | chrX:154264958-154266073(+) | 474383    | different |
| mir-1184     | MI0006277 | chrX:154340372-154340470(+) | F8A3      | chrX:154340340-154341455(-) | 474384    | different |
| mir-1308     | MI0006441 | chrX:21990180-21990233(-)   | PHEX      | chrX:21960842-22176399(+)   | 5251      | different |
| mir-548f-5   | MI0006378 | chrX:32569512-32569597(-)   | DMD       | chrX:31047266-33267647(-)   | 1756      | same      |
| mir-98       | MI0000100 | chrX:53599909-53600027(-)   | HUWE1     | chrX:53576476-53697776(-)   | 10075     | same      |
| let-7f-2     | MI0000068 | chrX:53600878-53600960(-)   | HUWE1     | chrX:53576476-53697776(-)   | 10075     | same      |
| mir-548i-4   | MI0006424 | chrX:83367416-83367492(-)   | RPS6KA6   | chrX:83205640-84362350(-)   | 27330     | same      |
| mir-361      | MI0000760 | chrX:85045297-85045368(-)   | CHM       | chrX:85002841-85189222(-)   | 1121      | same      |

Supplemental Table 2: A list of pre-miRNAs in the CNV regions

Supplemental Table 2: A list of pre-miRNAs in the CNV regions

| pre-miRNA ID | MI ID     | pre-miRNA location (hg18)   | CNV ID          | CNV Position (hg18)      | Observed CNVs <sup>a</sup> |
|--------------|-----------|-----------------------------|-----------------|--------------------------|----------------------------|
| mir-200b     | MI0000342 | chr1:1092347-1092441(+)     | Variation_30362 | chr1:702445-1697636      | 11 gains                   |
| mir-200b     | MI0000342 | chr1:1092347-1092441(+)     | Variation_0001  | chr1:1083805-1283805     | 1 loss                     |
| mir-200a     | MI0000737 | chr1:1093106-1093195(+)     | Variation_30362 | chr1:702445-1697636      | 11 gains                   |
| mir-200a     | MI0000737 | chr1:1093106-1093195(+)     | Variation_0001  | chr1:1083805-1283805     | 1 loss                     |
| mir-429      | MI0001641 | chr1:1094248-1094330(+)     | Variation_30362 | chr1:702445-1697636      | 11 gains                   |
| mir-429      | MI0001641 | chr1:1094248-1094330(+)     | Variation_0001  | chr1:1083805-1283805     | 1 loss                     |
| mir-320b-1   | MI0003776 | chr1:117015894-117015972(+) | Variation_4243  | chr1:116927828-117128034 | 11 gains                   |
| mir-320b-1   | MI0003776 | chr1:117015894-117015972(+) | Variation_3307  | chr1:116966438-117076198 | N.A.                       |
| mir-92b      | MI0003560 | chr1:153431592-153431687(+) | Variation_3315  | chr1:153361602-153581431 | N.A.                       |
| mir-92b      | MI0003560 | chr1:153431592-153431687(+) | Variation_4257  | chr1:153361603-153541655 | 6 losses                   |
| mir-555      | MI0003561 | chr1:153582765-153582860(-) | Variation_6789  | chr1:153489907-154184585 | 39 losses                  |
| mir-556      | MI0003562 | chr1:160578960-160579054(+) | Variation_8336  | chr1:160355955-160643940 | 1 gain                     |
| mir-556      | MI0003562 | chr1:160578960-160579054(+) | Variation_9377  | chr1:160343145-160612442 | 1 gain                     |
| mir-556      | MI0003562 | chr1:160578960-160579054(+) | Variation_2330  | chr1:160331092-160626632 | 3 gains                    |
| mir-556      | MI0003562 | chr1:160578960-160579054(+) | Variation_2330  | chr1:160331092-160626632 | 3 gains                    |
| mir-556      | MI0003562 | chr1:160578960-160579054(+) | Variation_3317  | chr1:160342772-160769980 | N.A.                       |
| mir-1255b-2  | MI0006436 | chr1:166234522-166234588(+) | Variation_6794  | chr1:166061707-166456848 | 5 losses                   |
| mir-557      | MI0003563 | chr1:166611386-166611483(+) | Variation_4261  | chr1:166445800-166619686 | 2 gains, 1 loss            |
| mir-1302-2   | MI0006363 | chr1:20229-20366(+)         | Variation_2041  | chr1:17845-167209        | 14 gains                   |
| mir-1302-2   | MI0006363 | chr1:20229-20366(+)         | Variation_30360 | chr1:1794-115824         | 25 gains                   |
| mir-1302-2   | MI0006363 | chr1:20229-20366(+)         | Variation_3274  | chr1:377-988150          | N.A.                       |
| mir-1302-2   | MI0006363 | chr1:20229-20366(+)         | Variation_0675  | chr1:17845-167209        | 1 loss                     |
| mir-320b-2   | MI0003839 | chr1:222511329-222511466(-) | Variation_31690 | chr1:222450467-222712973 | 1 loss                     |
| mir-551a     | MI0003556 | chr1:3467119-3467214(-)     | Variation_3278  | chr1:3278798-3538713     | N.A.                       |
| mir-551a     | MI0003556 | chr1:3467119-3467214(-)     | Variation_29824 | chr1:3284282-3497721     | 1 loss                     |
| mir-551a     | MI0003556 | chr1:3467119-3467214(-)     | Variation_29825 | chr1:3358003-3539057     | 1 loss                     |
| mir-1977     | MI0009987 | chr1:556050-556128(-)       | Variation_37560 | chr1:554340-696231       | 1 gain                     |
| mir-1977     | MI0009987 | chr1:556050-556128(-)       | Variation_37599 | chr1:554340-696231       | 1 gain                     |
| mir-1977     | MI0009987 | chr1:556050-556128(-)       | Variation_2294  | chr1:77822-1008567       | 4 gains, 1 loss            |
| mir-1977     | MI0009987 | chr1:556050-556128(-)       | Variation_3274  | chr1:377-988150          | N.A.                       |
| mir-1977     | MI0009987 | chr1:556050-556128(-)       | Variation_31594 | chr1:346077-623339       | 30 losses                  |
| mir-1977     | MI0009987 | chr1:556050-556128(-)       | Variation_4190  | chr1:529118-646613       | 8 losses                   |
| mir-34a      | MI0000268 | chr1:9134314-9134423(-)     | Variation_5198  | chr1:9089163-9197219     | 1 gain                     |
| mir-1302-3   | MI0006364 | chr2:114057006-114057143(-) | Variation_31000 | chr2:114046446-114075552 | 5 gains                    |
| mir-1302-3   | MI0006364 | chr2:114057006-114057143(-) | Variation_3386  | chr2:113968415-114145148 | N.A.                       |

Supplemental Table 2: A list of pre-miRNAs in the CNV regions

| pre-miRNA | MI ID     | pre-miRNA location (hg18)   | CNV ID          | CNV Position (hg18)      | Observed CNVs <sup>a</sup> |
|-----------|-----------|-----------------------------|-----------------|--------------------------|----------------------------|
| mir-663b  | MI0006336 | chr2:132731009-132731123(-) | Variation_7231  | chr2:132489782-132765542 | 10 gains, 1 loss           |
| mir-663b  | MI0006336 | chr2:132731009-132731123(-) | Variation_31014 | chr2:132726460-132763489 | 19 gains                   |
| mir-663b  | MI0006336 | chr2:132731009-132731123(-) | Variation_3393  | chr2:130063308-132914473 | N.A.                       |
| mir-128-1 | MI0000447 | chr2:136139437-136139518(+) | Variation_47933 | chr2:135766452-136254422 | 6 losses                   |
| mir-1978  | MI0009988 | chr2:149355835-149355887(-) | Variation_8391  | chr2:148867828-149813849 | 1 gain                     |
| mir-1244  | MI0006379 | chr2:232286268-232286352(+) | Variation_3408  | chr2:232245069-232714102 | N.A.                       |
| mir-1244  | MI0006379 | chr2:232286268-232286352(+) | Variation_3408  | chr2:232245069-232714102 | N.A.                       |
| mir-1471  | MI0007076 | chr2:232465196-232465252(-) | Variation_3408  | chr2:232245069-232714102 | N.A.                       |
| mir-1471  | MI0007076 | chr2:232465196-232465252(-) | Variation_3408  | chr2:232245069-232714102 | N.A.                       |
| mir-149   | MI0000478 | chr2:241044091-241044179(+) | Variation_2428  | chr2:241039698-241158385 | 1 gain                     |
| mir-149   | MI0000478 | chr2:241044091-241044179(+) | Variation_3409  | chr2:241013794-241237544 | N.A.                       |
| mir-1301  | MI0003815 | chr2:25405013-25405094(-)   | Variation_7259  | chr2:25140708-25462320   | 2 losses                   |
| mir-558   | MI0003564 | chr2:32610724-32610817(+)   | Variation_5202  | chr2:32532164-33063930   | 1 gain                     |
| mir-558   | MI0003564 | chr2:32610724-32610817(+)   | Variation_5203  | chr2:32265834-33054085   | 1 gain                     |
| mir-558   | MI0003564 | chr2:32610724-32610817(+)   | Variation_8367  | chr2:32392740-33185053   | 1 gain                     |
| mir-217   | MI0000293 | chr2:56063606-56063715(-)   | Variation_3358  | chr2:56031943-56325898   | N.A.                       |
| mir-217   | MI0000293 | chr2:56063606-56063715(-)   | Variation_3358  | chr2:56031943-56325898   | N.A.                       |
| mir-217   | MI0000293 | chr2:56063606-56063715(-)   | Variation_3358  | chr2:56031943-56325898   | N.A.                       |
| mir-216a  | MI0000292 | chr2:56069589-56069698(-)   | Variation_3358  | chr2:56031943-56325898   | N.A.                       |
| mir-216a  | MI0000292 | chr2:56069589-56069698(-)   | Variation_3358  | chr2:56031943-56325898   | N.A.                       |
| mir-216a  | MI0000292 | chr2:56069589-56069698(-)   | Variation_3358  | chr2:56031943-56325898   | N.A.                       |
| mir-216a  | MI0000292 | chr2:56069589-56069698(-)   | Variation_3358  | chr2:56031943-56325898   | N.A.                       |
| mir-216b  | MI0005569 | chr2:56081353-56081434(-)   | Variation_3358  | chr2:56031943-56325898   | N.A.                       |
| mir-216b  | MI0005569 | chr2:56081353-56081434(-)   | Variation_3358  | chr2:56031943-56325898   | N.A.                       |
| mir-216b  | MI0005569 | chr2:56081353-56081434(-)   | Variation_3358  | chr2:56031943-56325898   | N.A.                       |
| mir-1280  | MI0006437 | chr3:129563698-129563791(+) | Variation_3447  | chr3:129540383-129920507 | N.A.                       |
| mir-1280  | MI0006437 | chr3:129563698-129563791(+) | Variation_30181 | chr3:129529333-129642049 | 1 loss                     |
| mir-1263  | MI0006398 | chr3:165371953-165372038(-) | Variation_3462  | chr3:165085143-165392754 | N.A.                       |
| mir-1263  | MI0006398 | chr3:165371953-165372038(-) | Variation_0038  | chr3:165317569-165466432 | 1 loss                     |
| mir-1224  | MI0003764 | chr3:185441887-185441971(+) | Variation_4364  | chr3:185337138-185502784 | 3 losses                   |
| mir-1248  | MI0006383 | chr3:187987155-187987260(+) | Variation_3467  | chr3:187819828-188050020 | N.A.                       |
| mir-1248  | MI0006383 | chr3:187987155-187987260(+) | Variation_47856 | chr3:187897578-188237424 | 1 loss                     |
| mir-570   | MI0003577 | chr3:196911452-196911548(+) | Variation_7399  | chr3:196904378-196963502 | 15 gains, 20 losses        |
| mir-570   | MI0003577 | chr3:196911452-196911548(+) | Variation_2491  | chr3:196584076-196965419 | 188 gains                  |
| mir-570   | MI0003577 | chr3:196911452-196911548(+) | Variation_0696  | chr3:196902846-197038755 | 2 gains, 2 losses          |
| mir-570   | MI0003577 | chr3:196911452-196911548(+) | Variation_31136 | chr3:196905807-196933793 | 2 gains                    |
| mir-570   | MI0003577 | chr3:196911452-196911548(+) | Variation_2064  | chr3:196902846-197038755 | 27 gains, 12 losses        |
| mir-570   | MI0003577 | chr3:196911452-196911548(+) | Variation_3472  | chr3:196864664-197555990 | N.A.                       |

Supplemental Table 2: A list of pre-miRNAs in the CNV regions

| pre-miRNA ID | MI ID     | pre-miRNA location (hg18)   | CNV ID          | CNV Position (hg18)      | Observed CNVs <sup>a</sup> |
|--------------|-----------|-----------------------------|-----------------|--------------------------|----------------------------|
| mir-570      | MI0003577 | chr3:196911452-196911548(+) | Variation_32549 | chr3:196767501-196963423 | 24 losses                  |
| mir-570      | MI0003577 | chr3:196911452-196911548(+) | Variation_4366  | chr3:196904545-197074094 | 5 losses                   |
| mir-922      | MI0005714 | chr3:198885764-198885844(-) | Variation_3473  | chr3:198339450-198982265 | N.A.                       |
| mir-922      | MI0005714 | chr3:198885764-198885844(-) | Variation_4370  | chr3:198817671-198982265 | 4 losses                   |
| mir-26a-1    | MI0000083 | chr3:37985899-37985975(+)   | Variation_3425  | chr3:37806487-38079228   | N.A.                       |
| mir-566      | MI0003572 | chr3:50185763-50185856(+)   | Variation_3429  | chr3:50173482-50346381   | N.A.                       |
| mir-566      | MI0003572 | chr3:50185763-50185856(+)   | Variation_4335  | chr3:50173490-50368468   | 18 losses                  |
| mir-566      | MI0003572 | chr3:50185763-50185856(+)   | Variation_30175 | chr3:50133778-50230309   | 2 losses                   |
| let-7g       | MI0000433 | chr3:52277334-52277417(-)   | Variation_4337  | chr3:52154023-52310861   | 3 gains                    |
| mir-135a-1   | MI0000452 | chr3:52303275-52303364(-)   | Variation_4337  | chr3:52154023-52310861   | 3 gains                    |
| mir-135a-1   | MI0000452 | chr3:52303275-52303364(-)   | Variation_4338  | chr3:52292518-52454577   | 6 losses                   |
| mir-1324     | MI0006657 | chr3:75762604-75762699(+)   | Variation_2462  | chr3:75474768-76085726   | 3 gains, 13 losses         |
| mir-1324     | MI0006657 | chr3:75762604-75762699(+)   | Variation_3434  | chr3:75698633-76160982   | N.A.                       |
| mir-1324     | MI0006657 | chr3:75762604-75762699(+)   | Variation_5367  | chr3:75332778-75935986   | 1 loss                     |
| mir-1324     | MI0006657 | chr3:75762604-75762699(+)   | Variation_8986  | chr3:75475063-75858773   | 2 losses                   |
| mir-1324     | MI0006657 | chr3:75762604-75762699(+)   | Variation_32497 | chr3:75745040-75900650   | 7 losses                   |
| mir-577      | MI0003584 | chr4:115797364-115797459(+) | Variation_8451  | chr4:115508845-115839119 | 1 gain                     |
| mir-577      | MI0003584 | chr4:115797364-115797459(+) | Variation_3508  | chr4:115561528-115809774 | N.A.                       |
| mir-218-1    | MI0000294 | chr4:20138996-20139105(+)   | Variation_4380  | chr4:20111993-20290054   | 9 gains, 18 losses         |
| mir-571      | MI0003578 | chr4:333946-334041(+)       | Variation_2066  | chr4:248197-418202       | 5 losses                   |
| mir-95       | MI0000097 | chr4:8057928-8058008(-)     | Variation_4374  | chr4:8042806-8202167     | 1 gain                     |
| mir-95       | MI0000097 | chr4:8057928-8058008(-)     | Variation_4373  | chr4:8009599-8099960     | 10 losses                  |
| mir-95       | MI0000097 | chr4:8057928-8058008(-)     | Variation_47968 | chr4:7838836-8223391     | 9 losses                   |
| mir-548i-2   | MI0006422 | chr4:9166887-9167035(-)     | Variation_9470  | chr4:8980214-9329079     | 1 gain                     |
| mir-548i-2   | MI0006422 | chr4:9166887-9167035(-)     | Variation_37604 | chr4:9089333-9195862     | 1 gain                     |
| mir-548i-2   | MI0006422 | chr4:9166887-9167035(-)     | Variation_2497  | chr4:8756821-9420903     | 17 gains, 2 losses         |
| mir-548i-2   | MI0006422 | chr4:9166887-9167035(-)     | Variation_0699  | chr4:9010036-9203157     | 2 gains, 11 losses         |
| mir-548i-2   | MI0006422 | chr4:9166887-9167035(-)     | Variation_34433 | chr4:8990916-9290749     | 2 gains                    |
| mir-548i-2   | MI0006422 | chr4:9166887-9167035(-)     | Variation_3479  | chr4:8573073-9882877     | N.A.                       |
| mir-548i-2   | MI0006422 | chr4:9166887-9167035(-)     | Variation_2069  | chr4:9010036-9203157     | 42 losses                  |
| mir-548f-3   | MI0006376 | chr5:109877429-109877515(-) | Variation_3571  | chr5:109669759-110056060 | N.A.                       |
| mir-548f-3   | MI0006376 | chr5:109877429-109877515(-) | Variation_2594  | chr5:109778421-110180038 | 1 loss                     |
| mir-548f-3   | MI0006376 | chr5:109877429-109877515(-) | Variation_9023  | chr5:109793062-110093410 | 1 loss                     |
| mir-548f-3   | MI0006376 | chr5:109877429-109877515(-) | Variation_10127 | chr5:109783199-110084156 | 1 loss                     |
| mir-886      | MI0005527 | chr5:135444076-135444196(-) | Variation_3577  | chr5:135193500-135502898 | N.A.                       |
| mir-1229     | MI0006319 | chr5:179157884-179157952(-) | Variation_0068  | chr5:179108621-179268202 | 1 loss                     |
| mir-579      | MI0003586 | chr5:32430241-32430338(-)   | Variation_3552  | chr5:32281118-32774401   | N.A.                       |

Supplemental Table 2: A list of pre-miRNAs in the CNV regions

| pre-miRNA | MI ID     | pre-miRNA location (hg18)   | CNV ID          | CNV Position (hg18)      | Observed CNVs <sup>a</sup> |
|-----------|-----------|-----------------------------|-----------------|--------------------------|----------------------------|
| mir-1974  | MI0009984 | chr5:93930928-93930997(-)   | Variation_32729 | chr5:93929215-93931984   | 17 losses                  |
| mir-583   | MI0003590 | chr5:95440598-95440672(+)   | Variation_2584  | chr5:95329992-95565292   | 1 gain                     |
| mir-583   | MI0003590 | chr5:95440598-95440672(+)   | Variation_8491  | chr5:95336741-95478080   | 1 gain                     |
| mir-583   | MI0003590 | chr5:95440598-95440672(+)   | Variation_3562  | chr5:95257462-95566189   | N.A.                       |
| mir-1236  | MI0006326 | chr6:32032595-32032696(-)   | Variation_3602  | chr6:31979491-32317091   | N.A.                       |
| mir-1236  | MI0006326 | chr6:32032595-32032696(-)   | Variation_4492  | chr6:31995533-32055579   | 36 losses                  |
| mir-548o  | MI0006402 | chr7:101833194-101833307(-) | Variation_3693  | chr7:101687460-101859452 | N.A.                       |
| mir-548o  | MI0006402 | chr7:101833194-101833307(-) | Variation_4553  | chr7:101767725-102083105 | 42 losses                  |
| mir-129-1 | MI0000252 | chr7:127635161-127635232(+) | Variation_7600  | chr7:127587300-127716539 | 1 gain                     |
| mir-153-2 | MI0000464 | chr7:157059789-157059875(-) | Variation_3715  | chr7:157043116-157306239 | N.A.                       |
| mir-1183  | MI0006276 | chr7:21477201-21477289(+)   | Variation_4527  | chr7:21455625-21654541   | 20 gains                   |
| mir-589   | MI0003599 | chr7:5501976-5502074(-)     | Variation_4524  | chr7:5431459-5671684     | 5 losses                   |
| mir-25    | MI0000082 | chr7:99529119-99529202(-)   | Variation_2104  | chr7:99410498-99593067   | 4 losses                   |
| mir-93    | MI0000095 | chr7:99529327-99529406(-)   | Variation_2104  | chr7:99410498-99593067   | 4 losses                   |
| mir-106b  | MI0000734 | chr7:99529552-99529633(-)   | Variation_2104  | chr7:99410498-99593067   | 4 losses                   |
| mir-599   | MI0003611 | chr8:100618040-100618134(-) | Variation_3744  | chr8:100473327-100907800 | N.A.                       |
| mir-599   | MI0003611 | chr8:100618040-100618134(-) | Variation_3744  | chr8:100473327-100907800 | N.A.                       |
| mir-875   | MI0005541 | chr8:100618190-100618265(-) | Variation_3744  | chr8:100473327-100907800 | N.A.                       |
| mir-875   | MI0005541 | chr8:100618190-100618265(-) | Variation_3744  | chr8:100473327-100907800 | N.A.                       |
| mir-1204  | MI0006337 | chr8:128877390-128877456(+) | Variation_8615  | chr8:128714000-128977143 | 1 gain                     |
| mir-1204  | MI0006337 | chr8:128877390-128877456(+) | Variation_4609  | chr8:128784031-128957168 | 4 losses                   |
| mir-661   | MI0003669 | chr8:145091347-145091435(-) | Variation_30307 | chr8:145064090-145195417 | 1 loss                     |
| mir-661   | MI0003669 | chr8:145091347-145091435(-) | Variation_30306 | chr8:145064090-145715426 | 2 losses                   |
| mir-661   | MI0003669 | chr8:145091347-145091435(-) | Variation_30305 | chr8:145064090-145484560 | 3 losses                   |
| mir-661   | MI0003669 | chr8:145091347-145091435(-) | Variation_30303 | chr8:145064090-145153236 | 5 losses                   |
| mir-661   | MI0003669 | chr8:145091347-145091435(-) | Variation_30304 | chr8:145064090-145247516 | 8 losses                   |
| mir-939   | MI0005761 | chr8:145590172-145590253(-) | Variation_3752  | chr8:145494501-145668486 | N.A.                       |
| mir-939   | MI0005761 | chr8:145590172-145590253(-) | Variation_3752  | chr8:145494501-145668486 | N.A.                       |
| mir-939   | MI0005761 | chr8:145590172-145590253(-) | Variation_4613  | chr8:145536611-145740218 | 16 losses                  |
| mir-939   | MI0005761 | chr8:145590172-145590253(-) | Variation_30306 | chr8:145064090-145715426 | 2 losses                   |
| mir-1234  | MI0006324 | chr8:145596284-145596367(-) | Variation_3752  | chr8:145494501-145668486 | N.A.                       |
| mir-1234  | MI0006324 | chr8:145596284-145596367(-) | Variation_3752  | chr8:145494501-145668486 | N.A.                       |
| mir-1234  | MI0006324 | chr8:145596284-145596367(-) | Variation_4613  | chr8:145536611-145740218 | 16 losses                  |
| mir-1234  | MI0006324 | chr8:145596284-145596367(-) | Variation_30306 | chr8:145064090-145715426 | 2 losses                   |
| mir-383   | MI0000791 | chr8:14755318-14755390(-)   | Variation_1771  | chr8:14681135-15426553   | N.A.                       |
| mir-383   | MI0000791 | chr8:14755318-14755390(-)   | Variation_3722  | chr8:14721071-15809077   | N.A.                       |
| mir-383   | MI0000791 | chr8:14755318-14755390(-)   | Variation_1447  | chr8:14741501-14763659   | 1 loss                     |

Supplemental Table 2: A list of pre-miRNAs in the CNV regions

| pre-miRNA  | MI ID     | pre-miRNA location (hg18)   | CNV ID          | CNV Position (hg18)      | Observed CNVs <sup>a</sup> |
|------------|-----------|-----------------------------|-----------------|--------------------------|----------------------------|
| mir-383    | MI0000791 | chr8:14755318-14755390(-)   | Variation_2122  | chr8:14724716-14893465   | 15 losses                  |
| mir-383    | MI0000791 | chr8:14755318-14755390(-)   | Variation_2741  | chr8:14670571-15719081   | 2 losses                   |
| mir-383    | MI0000791 | chr8:14755318-14755390(-)   | Variation_9086  | chr8:14675298-15708398   | 2 losses                   |
| mir-383    | MI0000791 | chr8:14755318-14755390(-)   | Variation_10244 | chr8:14675272-15704610   | 2 losses                   |
| mir-383    | MI0000791 | chr8:14755318-14755390(-)   | Variation_33013 | chr8:14675524-15704951   | 7 losses                   |
| mir-320a   | MI0000542 | chr8:22158420-22158501(-)   | Variation_3726  | chr8:20577324-23167554   | N.A.                       |
| mir-320a   | MI0000542 | chr8:22158420-22158501(-)   | Variation_2746  | chr8:21729708-22858325   | 1 loss                     |
| mir-548i-3 | MI0006423 | chr8:7983873-7984021(-)     | Variation_8593  | chr8:7222992-8183341     | 1 gain                     |
| mir-548i-3 | MI0006423 | chr8:7983873-7984021(-)     | Variation_0737  | chr8:7735038-8024983     | 1 gain                     |
| mir-548i-3 | MI0006423 | chr8:7983873-7984021(-)     | Variation_34453 | chr8:7727730-8183341     | 2 gains                    |
| mir-548i-3 | MI0006423 | chr8:7983873-7984021(-)     | Variation_2116  | chr8:7917018-8067760     | 25 gains, 34 losses        |
| mir-548i-3 | MI0006423 | chr8:7983873-7984021(-)     | Variation_2117  | chr8:7735038-8024983     | 4 gains, 19 losses         |
| mir-548i-3 | MI0006423 | chr8:7983873-7984021(-)     | Variation_34519 | chr8:7222990-8238782     | 4 gains                    |
| mir-548i-3 | MI0006423 | chr8:7983873-7984021(-)     | Variation_0739  | chr8:7917018-8067760     | 5 gains, 17 losses         |
| mir-548i-3 | MI0006423 | chr8:7983873-7984021(-)     | Variation_0296  | chr8:6871616-8212038     | 8 gains                    |
| mir-548i-3 | MI0006423 | chr8:7983873-7984021(-)     | Variation_2732  | chr8:6908814-8183341     | 9 gains, 14 losses         |
| mir-548i-3 | MI0006423 | chr8:7983873-7984021(-)     | Variation_3719  | chr8:6719130-8344153     | N.A.                       |
| mir-548i-3 | MI0006423 | chr8:7983873-7984021(-)     | Variation_0738  | chr8:7873159-8024984     | 1 loss                     |
| mir-548i-3 | MI0006423 | chr8:7983873-7984021(-)     | Variation_9081  | chr8:7278542-8208881     | 1 loss                     |
| mir-548i-3 | MI0006423 | chr8:7983873-7984021(-)     | Variation_2118  | chr8:7873159-8024984     | 10 losses                  |
| mir-455    | MI0003513 | chr9:116011535-116011630(+) | Variation_5263  | chr9:115851115-116406464 | 1 gain                     |
| mir-455    | MI0003513 | chr9:116011535-116011630(+) | Variation_5264  | chr9:115832765-116394683 | 1 gain                     |
| mir-126    | MI0000471 | chr9:138684875-138684959(+) | Variation_7732  | chr9:138680837-138688363 | 1 gain                     |
| mir-126    | MI0000471 | chr9:138684875-138684959(+) | Variation_31535 | chr9:138521027-138773928 | 1 gain                     |
| mir-126    | MI0000471 | chr9:138684875-138684959(+) | Variation_3785  | chr9:138370650-138946306 | N.A.                       |
| mir-126    | MI0000471 | chr9:138684875-138684959(+) | Variation_5415  | chr9:138598408-139364371 | 1 loss                     |
| mir-126    | MI0000471 | chr9:138684875-138684959(+) | Variation_30355 | chr9:138374138-138776337 | 1 loss                     |
| mir-126    | MI0000471 | chr9:138684875-138684959(+) | Variation_30357 | chr9:138633359-138762781 | 1 loss                     |
| mir-126    | MI0000471 | chr9:138684875-138684959(+) | Variation_30358 | chr9:138654524-138710754 | 1 loss                     |
| mir-126    | MI0000471 | chr9:138684875-138684959(+) | Variation_30359 | chr9:138654524-138943491 | 1 loss                     |
| mir-126    | MI0000471 | chr9:138684875-138684959(+) | Variation_30350 | chr9:138374138-139070172 | 2 losses                   |
| mir-126    | MI0000471 | chr9:138684875-138684959(+) | Variation_30351 | chr9:138515294-138741845 | 2 losses                   |
| mir-126    | MI0000471 | chr9:138684875-138684959(+) | Variation_30352 | chr9:138603775-138702976 | 2 losses                   |
| mir-126    | MI0000471 | chr9:138684875-138684959(+) | Variation_30348 | chr9:138619531-138690438 | 4 losses                   |
| mir-1302-2 | MI0006363 | chr9:20144-20281(+)         | Variation_31460 | chr9:2044-35316          | 5 gains                    |
| mir-1302-2 | MI0006363 | chr9:20144-20281(+)         | Variation_33061 | chr9:2044-38541          | 1 loss                     |
| mir-31     | MI0000089 | chr9:21502114-21502184(-)   | Variation_2807  | chr9:21489624-21516526   | 1 loss                     |



**Supplemental Table 2: A list of pre-miRNAs in the CNV regions**

| pre-miRNA  | MI ID     | pre-miRNA location (hg18)    | CNV ID          | CNV Position (hg18)       | Observed CNVs <sup>a</sup> |
|------------|-----------|------------------------------|-----------------|---------------------------|----------------------------|
| mir-1299   | MI0006359 | chr9:68292059-68292141(-)    | Variation_2819  | chr9:67023497-70216846    | 1 gain                     |
| mir-1299   | MI0006359 | chr9:68292059-68292141(-)    | Variation_2144  | chr9:67627819-68779114    | 2 gains, 1 loss            |
| mir-1299   | MI0006359 | chr9:68292059-68292141(-)    | Variation_3770  | chr9:65207500-70343347    | N.A.                       |
| mir-1299   | MI0006359 | chr9:68292059-68292141(-)    | Variation_22958 | chr9:67924405-70025289    | 1 loss                     |
| mir-1299   | MI0006359 | chr9:68292059-68292141(-)    | Variation_23255 | chr9:67923848-70025523    | 1 loss                     |
| mir-1299   | MI0006359 | chr9:68292059-68292141(-)    | Variation_23255 | chr9:67923848-70025523    | 1 loss                     |
| mir-1299   | MI0006359 | chr9:68292059-68292141(-)    | Variation_2146  | chr9:68072566-68403907    | 3 losses                   |
| mir-1299   | MI0006359 | chr9:68292059-68292141(-)    | Variation_7748  | chr9:68173261-70091682    | 4 losses                   |
| mir-7-1    | MI0000263 | chr9:85774483-85774592(-)    | Variation_31520 | chr9:85660189-85782828    | 1 gain                     |
| mir-7-1    | MI0000263 | chr9:85774483-85774592(-)    | Variation_3773  | chr9:85603844-85793422    | N.A.                       |
| let-7a-1   | MI0000060 | chr9:95978060-95978139(+)    | Variation_4645  | chr9:95873863-96081830    | 18 gains                   |
| let-7f-1   | MI0000067 | chr9:95978450-95978536(+)    | Variation_4645  | chr9:95873863-96081830    | 18 gains                   |
| let-7d     | MI0000065 | chr9:95980937-95981023(+)    | Variation_4645  | chr9:95873863-96081830    | 18 gains                   |
| mir-608    | MI0003621 | chr10:102724732-102724831(+) | Variation_4711  | chr10:102666924-102848009 | 7 losses                   |
| mir-202    | MI0003130 | chr10:134911006-134911115(-) | Variation_5272  | chr10:134853407-135114035 | 1 gain                     |
| mir-202    | MI0003130 | chr10:134911006-134911115(-) | Variation_5273  | chr10:134853407-135114035 | 1 gain                     |
| mir-202    | MI0003130 | chr10:134911006-134911115(-) | Variation_4722  | chr10:134807090-134984241 | 1 gain                     |
| mir-202    | MI0003130 | chr10:134911006-134911115(-) | Variation_30525 | chr10:134885815-134918923 | 11 gains                   |
| mir-202    | MI0003130 | chr10:134911006-134911115(-) | Variation_2896  | chr10:134868158-135282675 | 20 gains, 1 loss           |
| mir-202    | MI0003130 | chr10:134911006-134911115(-) | Variation_3829  | chr10:134694412-135072292 | N.A.                       |
| mir-202    | MI0003130 | chr10:134911006-134911115(-) | Variation_29879 | chr10:134850149-134936370 | 1 loss                     |
| mir-202    | MI0003130 | chr10:134911006-134911115(-) | Variation_4721  | chr10:134753003-135031726 | 13 losses                  |
| mir-202    | MI0003130 | chr10:134911006-134911115(-) | Variation_29878 | chr10:134903011-135073008 | 2 losses                   |
| mir-202    | MI0003130 | chr10:134911006-134911115(-) | Variation_4723  | chr10:134825203-134931158 | 9 losses                   |
| mir-1265   | MI0006401 | chr10:14518581-14518666(+)   | Variation_47859 | chr10:14426301-14833838   | 2 losses                   |
| mir-511-1  | MI0003127 | chr10:17927113-17927199(+)   | Variation_6855  | chr10:17922308-17931734   | 2 gains                    |
| mir-604    | MI0003617 | chr10:29873939-29874032(-)   | Variation_4673  | chr10:29843746-30010541   | 3 losses                   |
| mir-938    | MI0005760 | chr10:29931199-29931281(-)   | Variation_4673  | chr10:29843746-30010541   | 3 losses                   |
| mir-548f-1 | MI0006374 | chr10:56037640-56037723(-)   | Variation_9154  | chr10:54402561-56985141   | 1 loss                     |
| mir-1254   | MI0006388 | chr10:70189081-70189177(+)   | Variation_3808  | chr10:70127725-70301318   | N.A.                       |
| mir-606    | MI0003619 | chr10:76982222-76982317(+)   | Variation_3810  | chr10:76904943-77122607   | N.A.                       |
| mir-675    | MI0005416 | chr11:1974565-1974637(-)     | Variation_29893 | chr11:1813688-2014222     | 1 loss                     |
| mir-675    | MI0005416 | chr11:1974565-1974637(-)     | Variation_29893 | chr11:1813688-2014222     | 1 loss                     |
| mir-675    | MI0005416 | chr11:1974565-1974637(-)     | Variation_29891 | chr11:1941703-2014222     | 2 losses                   |
| mir-675    | MI0005416 | chr11:1974565-1974637(-)     | Variation_29891 | chr11:1941703-2014222     | 2 losses                   |
| mir-210    | MI0000286 | chr11:558089-558198(-)       | Variation_3831  | chr11:399846-1313968      | N.A.                       |
| mir-210    | MI0000286 | chr11:558089-558198(-)       | Variation_29882 | chr11:368188-631190       | 1 loss                     |

**Supplemental Table 2: A list of pre-miRNAs in the CNV regions**

| pre-miRNA  | MI ID     | pre-miRNA location (hg18)    | CNV ID          | CNV Position (hg18)       | Observed CNVs <sup>a</sup> |
|------------|-----------|------------------------------|-----------------|---------------------------|----------------------------|
| mir-210    | MI0000286 | chr11:558089-558198(-)       | Variation_29883 | chr11:368188-860446       | 1 loss                     |
| mir-210    | MI0000286 | chr11:558089-558198(-)       | Variation_29884 | chr11:539119-700558       | 1 loss                     |
| mir-130a   | MI0000448 | chr11:57165247-57165335(+)   | Variation_4744  | chr11:57055930-57237626   | 3 gains                    |
| mir-612    | MI0003625 | chr11:64968505-64968604(+)   | Variation_5423  | chr11:64769870-65011116   | 1 loss                     |
| mir-619    | MI0003633 | chr12:107754813-107754911(-) | Variation_5312  | chr12:107710583-108040548 | 1 gain                     |
| mir-620    | MI0003634 | chr12:115070748-115070842(-) | Variation_4787  | chr12:114960308-115132869 | 6 losses                   |
| mir-196a-2 | MI0000279 | chr12:52671789-52671898(+)   | Variation_3890  | chr12:52633336-52820913   | N.A.                       |
| mir-196a-2 | MI0000279 | chr12:52671789-52671898(+)   | Variation_3890  | chr12:52633336-52820913   | N.A.                       |
| mir-615    | MI0003628 | chr12:52714001-52714096(+)   | Variation_3890  | chr12:52633336-52820913   | N.A.                       |
| mir-615    | MI0003628 | chr12:52714001-52714096(+)   | Variation_3890  | chr12:52633336-52820913   | N.A.                       |
| mir-616    | MI0003629 | chr12:56199213-56199309(-)   | Variation_3891  | chr12:56116000-56288135   | N.A.                       |
| let-7i     | MI0000434 | chr12:61283733-61283816(+)   | Variation_0311  | chr12:61080571-61294231   | 1 loss                     |
| mir-1244   | MI0006379 | chr12:9283330-9283414(-)     | Variation_3874  | chr12:9262862-9814796     | N.A.                       |
| mir-492    | MI0003131 | chr12:93752305-93752420(+)   | Variation_5683  | chr12:93743891-93753661   | 1 loss                     |
| mir-1251   | MI0006386 | chr12:96409818-96409887(+)   | Variation_1926  | chr12:96401144-96412948   | N.A.                       |
| mir-622    | MI0003636 | chr13:89681437-89681532(+)   | Variation_34606 | chr13:89183845-89692546   | 2 losses                   |
| mir-770    | MI0005118 | chr14:100388480-100388577(+) | Variation_8776  | chr14:100138042-100389000 | 1 gain                     |
| mir-203    | MI0000283 | chr14:103653495-103653604(+) | Variation_29960 | chr14:103615037-103694442 | 4 losses                   |
| mir-624    | MI0003638 | chr14:30553603-30553699(-)   | Variation_7031  | chr14:29869974-30981496   | 2 losses                   |
| mir-1302-2 | MI0006363 | chr15:100318185-100318322(-) | Variation_35283 | chr15:100317256-100330545 | 1 gain                     |
| mir-1302-2 | MI0006363 | chr15:100318185-100318322(-) | Variation_30727 | chr15:100262624-100336759 | 15 gains                   |
| mir-1302-2 | MI0006363 | chr15:100318185-100318322(-) | Variation_32067 | chr15:100276930-100336759 | 1 loss                     |
| mir-1268   | MI0006405 | chr15:20014593-20014644(-)   | Variation_8784  | chr15:18427100-21405800   | 1 gain                     |
| mir-1268   | MI0006405 | chr15:20014593-20014644(-)   | Variation_8785  | chr15:19112164-20773725   | 1 gain                     |
| mir-1268   | MI0006405 | chr15:20014593-20014644(-)   | Variation_8786  | chr15:19464910-20089400   | 1 gain                     |
| mir-1268   | MI0006405 | chr15:20014593-20014644(-)   | Variation_37535 | chr15:19767013-20093116   | 1 gain                     |
| mir-1268   | MI0006405 | chr15:20014593-20014644(-)   | Variation_37626 | chr15:19767013-20093116   | 1 gain                     |
| mir-1268   | MI0006405 | chr15:20014593-20014644(-)   | Variation_34557 | chr15:19821400-20089400   | 13 gains                   |
| mir-1268   | MI0006405 | chr15:20014593-20014644(-)   | Variation_8779  | chr15:18427100-20089400   | 173 gains                  |
| mir-1268   | MI0006405 | chr15:20014593-20014644(-)   | Variation_8783  | chr15:19181702-20329239   | 2 gains                    |
| mir-1268   | MI0006405 | chr15:20014593-20014644(-)   | Variation_30670 | chr15:18458212-20092648   | 20 gains                   |
| mir-1268   | MI0006405 | chr15:20014593-20014644(-)   | Variation_34576 | chr15:18427100-20414400   | 200 gains                  |
| mir-1268   | MI0006405 | chr15:20014593-20014644(-)   | Variation_3070  | chr15:18403665-21241985   | 204 gains, 24 losses       |
| mir-1268   | MI0006405 | chr15:20014593-20014644(-)   | Variation_4874  | chr15:19932331-20097557   | 23 gains, 6 losses         |
| mir-1268   | MI0006405 | chr15:20014593-20014644(-)   | Variation_8781  | chr15:18427100-20421205   | 23 gains                   |
| mir-1268   | MI0006405 | chr15:20014593-20014644(-)   | Variation_4873  | chr15:19849582-20046356   | 25 gains, 1 loss           |
| mir-1268   | MI0006405 | chr15:20014593-20014644(-)   | Variation_34504 | chr15:18427100-20773725   | 3 gains                    |

**Supplemental Table 2: A list of pre-miRNAs in the CNV regions**

| pre-miRNA | MI ID     | pre-miRNA location (hg18)  | CNV ID          | CNV Position (hg18)     | Observed CNVs <sup>a</sup> |
|-----------|-----------|----------------------------|-----------------|-------------------------|----------------------------|
| mir-1268  | MI0006405 | chr15:20014593-20014644(-) | Variation_8782  | chr15:19821400-20089400 | 5 gains                    |
| mir-1268  | MI0006405 | chr15:20014593-20014644(-) | Variation_7046  | chr15:18657417-20249915 | 7 gains, 60 losses         |
| mir-1268  | MI0006405 | chr15:20014593-20014644(-) | Variation_34545 | chr15:19111608-20089400 | 7 gains                    |
| mir-1268  | MI0006405 | chr15:20014593-20014644(-) | Variation_3951  | chr15:18263733-21365850 | N.A.                       |
| mir-1268  | MI0006405 | chr15:20014593-20014644(-) | Variation_9256  | chr15:19272564-20773725 | 1 loss                     |
| mir-1268  | MI0006405 | chr15:20014593-20014644(-) | Variation_34665 | chr15:18427103-20421204 | 164 losses                 |
| mir-1268  | MI0006405 | chr15:20014593-20014644(-) | Variation_0318  | chr15:18526971-20225830 | 18 losses                  |
| mir-1268  | MI0006405 | chr15:20014593-20014644(-) | Variation_9251  | chr15:18427100-20773725 | 18 losses                  |
| mir-1268  | MI0006405 | chr15:20014593-20014644(-) | Variation_9249  | chr15:19821421-20089383 | 19 losses                  |
| mir-1268  | MI0006405 | chr15:20014593-20014644(-) | Variation_34607 | chr15:19336725-20089383 | 2 losses                   |
| mir-1268  | MI0006405 | chr15:20014593-20014644(-) | Variation_34608 | chr15:18427103-20773725 | 2 losses                   |
| mir-1268  | MI0006405 | chr15:20014593-20014644(-) | Variation_31980 | chr15:18431801-20197782 | 25 losses                  |
| mir-1268  | MI0006405 | chr15:20014593-20014644(-) | Variation_4875  | chr15:19970520-20094181 | 4 losses                   |
| mir-1268  | MI0006405 | chr15:20014593-20014644(-) | Variation_9252  | chr15:19821421-20329239 | 4 losses                   |
| mir-1268  | MI0006405 | chr15:20014593-20014644(-) | Variation_34643 | chr15:19821421-20089383 | 4 losses                   |
| mir-1268  | MI0006405 | chr15:20014593-20014644(-) | Variation_9254  | chr15:19139652-20329239 | 5 losses                   |
| mir-1268  | MI0006405 | chr15:20014593-20014644(-) | Variation_34663 | chr15:18682600-20089383 | 70 losses                  |
| mir-1268  | MI0006405 | chr15:20014593-20014644(-) | Variation_9250  | chr15:18427103-20089400 | 76 losses                  |
| mir-211   | MI0000287 | chr15:29144527-29144636(-) | Variation_7057  | chr15:28970616-29258315 | 5 losses                   |
| mir-1233  | MI0006323 | chr15:32461562-32461643(-) | Variation_30705 | chr15:32461525-32663325 | 26 gains                   |
| mir-1233  | MI0006323 | chr15:32461562-32461643(-) | Variation_7058  | chr15:29769358-32654590 | 47 gains, 48 losses        |
| mir-1233  | MI0006323 | chr15:32461562-32461643(-) | Variation_3076  | chr15:32447708-32687764 | 7 gains, 51 losses         |
| mir-1233  | MI0006323 | chr15:32461562-32461643(-) | Variation_3957  | chr15:32330313-32775539 | N.A.                       |
| mir-1233  | MI0006323 | chr15:32461562-32461643(-) | Variation_3957  | chr15:32330313-32775539 | N.A.                       |
| mir-1233  | MI0006323 | chr15:32461562-32461643(-) | Variation_29976 | chr15:32439975-32587886 | 1 loss                     |
| mir-1233  | MI0006323 | chr15:32461562-32461643(-) | Variation_2192  | chr15:32431850-32641325 | 34 losses                  |
| mir-1233  | MI0006323 | chr15:32607783-32607864(-) | Variation_0784  | chr15:32518465-32669922 | 16 gains                   |
| mir-1233  | MI0006323 | chr15:32607783-32607864(-) | Variation_30705 | chr15:32461525-32663325 | 26 gains                   |
| mir-1233  | MI0006323 | chr15:32607783-32607864(-) | Variation_7058  | chr15:29769358-32654590 | 47 gains, 48 losses        |
| mir-1233  | MI0006323 | chr15:32607783-32607864(-) | Variation_3076  | chr15:32447708-32687764 | 7 gains, 51 losses         |
| mir-1233  | MI0006323 | chr15:32607783-32607864(-) | Variation_3957  | chr15:32330313-32775539 | N.A.                       |
| mir-1233  | MI0006323 | chr15:32607783-32607864(-) | Variation_3957  | chr15:32330313-32775539 | N.A.                       |
| mir-1233  | MI0006323 | chr15:32607783-32607864(-) | Variation_0455  | chr15:32472522-32628056 | 1 loss                     |
| mir-1233  | MI0006323 | chr15:32607783-32607864(-) | Variation_9264  | chr15:32564059-32772283 | 1 loss                     |
| mir-1233  | MI0006323 | chr15:32607783-32607864(-) | Variation_35311 | chr15:32472522-32628056 | 1 loss                     |
| mir-1233  | MI0006323 | chr15:32607783-32607864(-) | Variation_0322  | chr15:32481879-32652370 | 3 losses                   |
| mir-1233  | MI0006323 | chr15:32607783-32607864(-) | Variation_2192  | chr15:32431850-32641325 | 34 losses                  |

Supplemental Table 2: A list of pre-miRNAs in the CNV regions

| pre-miRNA  | MI ID     | pre-miRNA location (hg18)  | CNV ID          | CNV Position (hg18)     | Observed CNVs <sup>a</sup> |
|------------|-----------|----------------------------|-----------------|-------------------------|----------------------------|
| mir-1233   | MI0006323 | chr15:32607783-32607864(-) | Variation_34645 | chr15:32564059-32765105 | 4 losses                   |
| mir-1233   | MI0006323 | chr15:32607783-32607864(-) | Variation_2193  | chr15:32518465-32669922 | 5 losses                   |
| mir-1233   | MI0006323 | chr15:32607783-32607864(-) | Variation_4896  | chr15:32496805-32698463 | 5 losses                   |
| mir-627    | MI0003641 | chr15:40279060-40279156(-) | Variation_0785  | chr15:40121667-40290274 | 1 gain                     |
| mir-1282   | MI0006429 | chr15:41873149-41873249(-) | Variation_3960  | chr15:41610450-41935933 | N.A.                       |
| mir-630    | MI0003644 | chr15:70666612-70666708(+) | Variation_3967  | chr15:70606839-70907613 | N.A.                       |
| mir-630    | MI0003644 | chr15:70666612-70666708(+) | Variation_0189  | chr15:70606852-70796524 | 1 loss                     |
| mir-184    | MI0000481 | chr15:77289185-77289268(+) | Variation_3970  | chr15:77142292-77305824 | N.A.                       |
| mir-1972   | MI0009982 | chr16:15011679-15011755(-) | Variation_7088  | chr16:14817728-15032941 | 9 gains                    |
| mir-1972   | MI0009982 | chr16:15011679-15011755(-) | Variation_32088 | chr16:14956281-15031429 | 11 losses                  |
| mir-1972   | MI0009982 | chr16:15011679-15011755(-) | Variation_37843 | chr16:14897364-15016088 | 180 losses                 |
| mir-484    | MI0002468 | chr16:15644652-15644730(+) | Variation_2203  | chr16:15601001-15767810 | 3 losses                   |
| mir-1225   | MI0006311 | chr16:2080197-2080286(-)   | Variation_5329  | chr16:1-2713166         | 1 gain                     |
| mir-1225   | MI0006311 | chr16:2080197-2080286(-)   | Variation_30000 | chr16:1985732-2085788   | 3 losses                   |
| mir-940    | MI0005762 | chr16:2261749-2261842(+)   | Variation_5329  | chr16:1-2713166         | 1 gain                     |
| mir-940    | MI0005762 | chr16:2261749-2261842(+)   | Variation_30002 | chr16:2161158-2307510   | 1 loss                     |
| mir-1826   | MI0008194 | chr16:33873009-33873093(+) | Variation_8825  | chr16:33371600-34997000 | 1 gain                     |
| mir-1826   | MI0008194 | chr16:33873009-33873093(+) | Variation_7106  | chr16:33843007-34316965 | 2 gains                    |
| mir-1826   | MI0008194 | chr16:33873009-33873093(+) | Variation_30782 | chr16:33852389-33874106 | 9 gains                    |
| mir-1826   | MI0008194 | chr16:33873009-33873093(+) | Variation_4002  | chr16:31658070-34224164 | N.A.                       |
| mir-138-2  | MI0000455 | chr16:55449931-55450014(+) | Variation_7119  | chr16:55448509-55475034 | 1 loss                     |
| mir-1538   | MI0007259 | chr16:68157212-68157272(-) | Variation_39186 | chr16:68120970-68159786 | 1 loss                     |
| mir-140    | MI0000456 | chr16:68524485-68524584(+) | Variation_4009  | chr16:68412623-68870723 | N.A.                       |
| mir-1972   | MI0009982 | chr16:68621750-68621826(+) | Variation_3123  | chr16:68609885-68745051 | 1 gain                     |
| mir-1972   | MI0009982 | chr16:68621750-68621826(+) | Variation_4009  | chr16:68412623-68870723 | N.A.                       |
| mir-1972   | MI0009982 | chr16:68621750-68621826(+) | Variation_32129 | chr16:68602755-68666385 | 6 losses                   |
| mir-1972   | MI0009982 | chr16:68621750-68621826(+) | Variation_4963  | chr16:68598107-68799077 | 7 losses                   |
| mir-662    | MI0003670 | chr16:760184-760278(+)     | Variation_5329  | chr16:1-2713166         | 1 gain                     |
| mir-662    | MI0003670 | chr16:760184-760278(+)     | Variation_30732 | chr16:629070-793603     | 6 gains                    |
| mir-662    | MI0003670 | chr16:760184-760278(+)     | Variation_3987  | chr16:266993-1111069    | N.A.                       |
| mir-662    | MI0003670 | chr16:760184-760278(+)     | Variation_29986 | chr16:619412-780770     | 1 loss                     |
| mir-662    | MI0003670 | chr16:760184-760278(+)     | Variation_29983 | chr16:510624-780770     | 5 losses                   |
| mir-548h-3 | MI0006413 | chr17:13387571-13387688(-) | Variation_47929 | chr17:13254552-13718932 | 6 losses                   |
| mir-22     | MI0000078 | chr17:1563947-1564031(-)   | Variation_32148 | chr17:1549217-1629756   | 1 loss                     |
| mir-22     | MI0000078 | chr17:1563947-1564031(-)   | Variation_30021 | chr17:1558949-1598530   | 2 losses                   |
| mir-1180   | MI0006273 | chr17:19188412-19188480(-) | Variation_4994  | chr17:18990988-19205701 | 2 gains, 1 loss            |
| mir-1253   | MI0006387 | chr17:2598122-2598226(-)   | Variation_4981  | chr17:2555411-2633546   | 1 gain                     |

Supplemental Table 2: A list of pre-miRNAs in the CNV regions

| pre-miRNA  | MI ID     | pre-miRNA location (hg18)  | CNV ID          | CNV Position (hg18)     | Observed CNVs <sup>a</sup> |
|------------|-----------|----------------------------|-----------------|-------------------------|----------------------------|
| mir-10a    | MI0000266 | chr17:44012199-44012308(-) | Variation_4040  | chr17:43957672-44191836 | N.A.                       |
| mir-10a    | MI0000266 | chr17:44012199-44012308(-) | Variation_4040  | chr17:43957672-44191836 | N.A.                       |
| mir-196a-1 | MI0000238 | chr17:44064851-44064920(-) | Variation_4040  | chr17:43957672-44191836 | N.A.                       |
| mir-196a-1 | MI0000238 | chr17:44064851-44064920(-) | Variation_4040  | chr17:43957672-44191836 | N.A.                       |
| mir-142    | MI0000458 | chr17:53763592-53763678(-) | Variation_4410  | chr17:53667859-53853403 | 3 gains                    |
| mir-454    | MI0003820 | chr17:54569901-54570015(-) | Variation_4043  | chr17:54437361-54780416 | N.A.                       |
| mir-454    | MI0003820 | chr17:54569901-54570015(-) | Variation_4043  | chr17:54437361-54780416 | N.A.                       |
| mir-301a   | MI0000745 | chr17:54583279-54583364(-) | Variation_4043  | chr17:54437361-54780416 | N.A.                       |
| mir-301a   | MI0000745 | chr17:54583279-54583364(-) | Variation_4043  | chr17:54437361-54780416 | N.A.                       |
| mir-548d-2 | MI0003671 | chr17:62898067-62898163(-) | Variation_0806  | chr17:62820089-62981367 | 1 gain                     |
| mir-657    | MI0003681 | chr17:76713671-76713768(-) | Variation_30032 | chr17:76626941-76878755 | 1 loss                     |
| mir-657    | MI0003681 | chr17:76713671-76713768(-) | Variation_5036  | chr17:76600967-76762177 | 13 losses                  |
| mir-338    | MI0000814 | chr17:76714278-76714344(-) | Variation_30032 | chr17:76626941-76878755 | 1 loss                     |
| mir-338    | MI0000814 | chr17:76714278-76714344(-) | Variation_5036  | chr17:76600967-76762177 | 13 losses                  |
| mir-1250   | MI0006385 | chr17:76721591-76721703(-) | Variation_30032 | chr17:76626941-76878755 | 1 loss                     |
| mir-1250   | MI0006385 | chr17:76721591-76721703(-) | Variation_5036  | chr17:76600967-76762177 | 13 losses                  |
| mir-1539   | MI0007260 | chr18:45267741-45267790(+) | Variation_35573 | chr18:45251209-45272914 | 1 loss                     |
| mir-638    | MI0003653 | chr19:10690080-10690179(+) | Variation_5086  | chr19:10650428-10814432 | 3 losses                   |
| mir-199a-1 | MI0000242 | chr19:10789102-10789172(-) | Variation_5087  | chr19:10728678-10897044 | 11 losses                  |
| mir-199a-1 | MI0000242 | chr19:10789102-10789172(-) | Variation_5086  | chr19:10650428-10814432 | 3 losses                   |
| mir-24-2   | MI0000081 | chr19:13808101-13808173(-) | Variation_5088  | chr19:13697718-13923800 | 4 losses                   |
| mir-27a    | MI0000085 | chr19:13808254-13808331(-) | Variation_5088  | chr19:13697718-13923800 | 4 losses                   |
| mir-23a    | MI0000079 | chr19:13808401-13808473(-) | Variation_5088  | chr19:13697718-13923800 | 4 losses                   |
| mir-181c   | MI0000271 | chr19:13846513-13846622(+) | Variation_5088  | chr19:13697718-13923800 | 4 losses                   |
| mir-181d   | MI0003139 | chr19:13846689-13846825(+) | Variation_5088  | chr19:13697718-13923800 | 4 losses                   |
| mir-1909   | MI0008330 | chr19:1767158-1767237(-)   | Variation_7191  | chr19:1271267-1950204   | 13 gains, 10 losses        |
| mir-1909   | MI0008330 | chr19:1767158-1767237(-)   | Variation_30061 | chr19:1758018-1810390   | 1 loss                     |
| mir-1909   | MI0008330 | chr19:1767158-1767237(-)   | Variation_30062 | chr19:1758018-2051346   | 1 loss                     |
| mir-1270   | MI0006407 | chr19:20371080-20371162(-) | Variation_4070  | chr19:20321226-20637787 | N.A.                       |
| mir-1270   | MI0006407 | chr19:20371080-20371162(-) | Variation_5443  | chr19:20212706-20384170 | 1 loss                     |
| mir-1270   | MI0006407 | chr19:20371080-20371162(-) | Variation_35616 | chr19:20362702-20521721 | 1 loss                     |
| mir-1270   | MI0006407 | chr19:20371080-20371162(-) | Variation_35617 | chr19:20370872-20521031 | 1 loss                     |
| mir-1270   | MI0006407 | chr19:20371080-20371162(-) | Variation_3183  | chr19:20360525-20566187 | 35 losses                  |
| mir-1227   | MI0006316 | chr19:2185061-2185148(-)   | Variation_5067  | chr19:2082210-2200763   | 15 losses                  |
| mir-1227   | MI0006316 | chr19:2185061-2185148(-)   | Variation_5068  | chr19:2138091-2323221   | 17 losses                  |
| mir-1302-2 | MI0006363 | chr19:22973-23110(+)       | Variation_30879 | chr19:11354-119972      | 20 gains                   |
| mir-641    | MI0003656 | chr19:45480290-45480388(-) | Variation_4080  | chr19:45304260-45531360 | N.A.                       |

**Supplemental Table 2: A list of pre-miRNAs in the CNV regions**

| pre-miRNA ID | MI ID     | pre-miRNA location (hg18)  | CNV ID          | CNV Position (hg18)     | Observed CNVs <sup>a</sup> |
|--------------|-----------|----------------------------|-----------------|-------------------------|----------------------------|
| mir-220c     | MI0005536 | chr19:53755341-53755423(-) | Variation_10563 | chr19:53705903-53769479 | 1 loss                     |
| mir-220c     | MI0005536 | chr19:53755341-53755423(-) | Variation_32261 | chr19:53097718-55337070 | 18 losses                  |
| mir-150      | MI0000479 | chr19:54695854-54695937(-) | Variation_32261 | chr19:53097718-55337070 | 18 losses                  |
| mir-150      | MI0000479 | chr19:54695854-54695937(-) | Variation_5111  | chr19:54643858-54765745 | 25 losses                  |
| mir-150      | MI0000479 | chr19:54695854-54695937(-) | Variation_5110  | chr19:54526058-54801852 | 4 losses                   |
| mir-99b      | MI0000746 | chr19:56887677-56887746(+) | Variation_30914 | chr19:56880176-56897284 | 3 gains                    |
| mir-99b      | MI0000746 | chr19:56887677-56887746(+) | Variation_4085  | chr19:56683708-56958587 | N.A.                       |
| mir-99b      | MI0000746 | chr19:56887677-56887746(+) | Variation_4085  | chr19:56683708-56958587 | N.A.                       |
| mir-99b      | MI0000746 | chr19:56887677-56887746(+) | Variation_4085  | chr19:56683708-56958587 | N.A.                       |
| mir-99b      | MI0000746 | chr19:56887677-56887746(+) | Variation_32264 | chr19:56881580-56901393 | 1 loss                     |
| let-7e       | MI0000066 | chr19:56887851-56887929(+) | Variation_30914 | chr19:56880176-56897284 | 3 gains                    |
| let-7e       | MI0000066 | chr19:56887851-56887929(+) | Variation_4085  | chr19:56683708-56958587 | N.A.                       |
| let-7e       | MI0000066 | chr19:56887851-56887929(+) | Variation_4085  | chr19:56683708-56958587 | N.A.                       |
| let-7e       | MI0000066 | chr19:56887851-56887929(+) | Variation_4085  | chr19:56683708-56958587 | N.A.                       |
| let-7e       | MI0000066 | chr19:56887851-56887929(+) | Variation_32264 | chr19:56881580-56901393 | 1 loss                     |
| mir-125a     | MI0000469 | chr19:56888319-56888404(+) | Variation_30914 | chr19:56880176-56897284 | 3 gains                    |
| mir-125a     | MI0000469 | chr19:56888319-56888404(+) | Variation_4085  | chr19:56683708-56958587 | N.A.                       |
| mir-125a     | MI0000469 | chr19:56888319-56888404(+) | Variation_4085  | chr19:56683708-56958587 | N.A.                       |
| mir-125a     | MI0000469 | chr19:56888319-56888404(+) | Variation_4085  | chr19:56683708-56958587 | N.A.                       |
| mir-125a     | MI0000469 | chr19:56888319-56888404(+) | Variation_32264 | chr19:56881580-56901393 | 1 loss                     |
| mir-935      | MI0005757 | chr19:59177373-59177463(+) | Variation_5115  | chr19:59041022-59190183 | 5 losses                   |
| mir-663      | MI0003672 | chr20:26136822-26136914(-) | Variation_31037 | chr20:26136626-26139184 | 10 gains                   |
| mir-663      | MI0003672 | chr20:26136822-26136914(-) | Variation_29708 | chr20:25663507-26257255 | 2 gains                    |
| mir-663      | MI0003672 | chr20:26136822-26136914(-) | Variation_7302  | chr20:26130045-26168912 | 3 gains                    |
| mir-663      | MI0003672 | chr20:26136822-26136914(-) | Variation_4098  | chr20:25649992-26267569 | N.A.                       |
| mir-663      | MI0003672 | chr20:26136822-26136914(-) | Variation_0225  | chr20:26072000-26181848 | 1 loss                     |
| mir-1825     | MI0008193 | chr20:30289259-30289311(+) | Variation_5132  | chr20:30174844-30352253 | 6 losses                   |
| mir-499      | MI0003183 | chr20:33041840-33041961(+) | Variation_5134  | chr20:32979153-33164714 | 3 losses                   |
| mir-1257     | MI0006391 | chr20:59961997-59962113(-) | Variation_4105  | chr20:59894657-60016638 | N.A.                       |
| mir-1257     | MI0006391 | chr20:59961997-59962113(-) | Variation_35935 | chr20:59936789-59973285 | 1 loss                     |
| mir-1257     | MI0006391 | chr20:59961997-59962113(-) | Variation_35936 | chr20:59937699-59981429 | 1 loss                     |
| mir-1-1      | MI0000651 | chr20:60561958-60562028(+) | Variation_5347  | chr20:60216284-60775837 | 1 gain                     |
| mir-1-1      | MI0000651 | chr20:60561958-60562028(+) | Variation_4106  | chr20:60305165-60897092 | N.A.                       |
| mir-1-1      | MI0000651 | chr20:60561958-60562028(+) | Variation_4106  | chr20:60305165-60897092 | N.A.                       |
| mir-1-1      | MI0000651 | chr20:60561958-60562028(+) | Variation_30131 | chr20:60320976-60584935 | 1 loss                     |
| mir-133a-2   | MI0000451 | chr20:60572564-60572665(+) | Variation_5347  | chr20:60216284-60775837 | 1 gain                     |
| mir-133a-2   | MI0000451 | chr20:60572564-60572665(+) | Variation_4106  | chr20:60305165-60897092 | N.A.                       |

Supplemental Table 2: A list of pre-miRNAs in the CNV regions

| pre-miRNA  | MI ID     | pre-miRNA location (hg18)  | CNV ID          | CNV Position (hg18)     | Observed CNVs <sup>a</sup> |
|------------|-----------|----------------------------|-----------------|-------------------------|----------------------------|
| mir-133a-2 | MI0000451 | chr20:60572564-60572665(+) | Variation_4106  | chr20:60305165-60897092 | N.A.                       |
| mir-133a-2 | MI0000451 | chr20:60572564-60572665(+) | Variation_30131 | chr20:60320976-60584935 | 1 loss                     |
| mir-124-3  | MI0000445 | chr20:61280297-61280383(+) | Variation_31044 | chr20:60877832-61701456 | 2 gains                    |
| mir-124-3  | MI0000445 | chr20:61280297-61280383(+) | Variation_5146  | chr20:61178258-61326392 | 29 losses                  |
| mir-124-3  | MI0000445 | chr20:61280297-61280383(+) | Variation_5147  | chr20:61234049-61347722 | 70 losses                  |
| mir-941-1  | MI0005763 | chr20:62021238-62021326(+) | Variation_2252  | chr20:61947227-62141109 | 3 gains                    |
| mir-941-1  | MI0005763 | chr20:62021238-62021326(+) | Variation_2252  | chr20:61947227-62141109 | 3 gains                    |
| mir-941-1  | MI0005763 | chr20:62021238-62021326(+) | Variation_2252  | chr20:61947227-62141109 | 3 gains                    |
| mir-941-1  | MI0005763 | chr20:62021238-62021326(+) | Variation_2252  | chr20:61947227-62141109 | 3 gains                    |
| mir-941-1  | MI0005763 | chr20:62021238-62021326(+) | Variation_2252  | chr20:61947227-62141109 | 3 gains                    |
| mir-941-2  | MI0005764 | chr20:62021545-62021633(+) | Variation_2252  | chr20:61947227-62141109 | 3 gains                    |
| mir-941-2  | MI0005764 | chr20:62021545-62021633(+) | Variation_2252  | chr20:61947227-62141109 | 3 gains                    |
| mir-941-2  | MI0005764 | chr20:62021545-62021633(+) | Variation_2252  | chr20:61947227-62141109 | 3 gains                    |
| mir-941-2  | MI0005764 | chr20:62021545-62021633(+) | Variation_2252  | chr20:61947227-62141109 | 3 gains                    |
| mir-941-2  | MI0005764 | chr20:62021545-62021633(+) | Variation_2252  | chr20:61947227-62141109 | 3 gains                    |
| mir-941-2  | MI0005764 | chr20:62021545-62021633(+) | Variation_2252  | chr20:61947227-62141109 | 3 gains                    |
| mir-941-3  | MI0005765 | chr20:62021657-62021745(+) | Variation_2252  | chr20:61947227-62141109 | 3 gains                    |
| mir-941-3  | MI0005765 | chr20:62021657-62021745(+) | Variation_2252  | chr20:61947227-62141109 | 3 gains                    |
| mir-941-3  | MI0005765 | chr20:62021657-62021745(+) | Variation_2252  | chr20:61947227-62141109 | 3 gains                    |
| mir-941-3  | MI0005765 | chr20:62021657-62021745(+) | Variation_2252  | chr20:61947227-62141109 | 3 gains                    |
| mir-941-3  | MI0005765 | chr20:62021657-62021745(+) | Variation_2252  | chr20:61947227-62141109 | 3 gains                    |
| mir-1914   | MI0008335 | chr20:62043262-62043341(-) | Variation_2252  | chr20:61947227-62141109 | 3 gains                    |
| mir-1914   | MI0008335 | chr20:62043262-62043341(-) | Variation_2252  | chr20:61947227-62141109 | 3 gains                    |
| mir-1914   | MI0008335 | chr20:62043262-62043341(-) | Variation_2252  | chr20:61947227-62141109 | 3 gains                    |
| mir-1914   | MI0008335 | chr20:62043262-62043341(-) | Variation_2252  | chr20:61947227-62141109 | 3 gains                    |
| mir-1914   | MI0008335 | chr20:62043262-62043341(-) | Variation_2252  | chr20:61947227-62141109 | 3 gains                    |
| mir-647    | MI0003662 | chr20:62044428-62044523(-) | Variation_2252  | chr20:61947227-62141109 | 3 gains                    |
| mir-647    | MI0003662 | chr20:62044428-62044523(-) | Variation_2252  | chr20:61947227-62141109 | 3 gains                    |
| mir-647    | MI0003662 | chr20:62044428-62044523(-) | Variation_2252  | chr20:61947227-62141109 | 3 gains                    |
| mir-647    | MI0003662 | chr20:62044428-62044523(-) | Variation_2252  | chr20:61947227-62141109 | 3 gains                    |
| mir-647    | MI0003662 | chr20:62044428-62044523(-) | Variation_2252  | chr20:61947227-62141109 | 3 gains                    |
| mir-185    | MI0000482 | chr22:18400662-18400743(+) | Variation_31071 | chr22:17399088-19383198 | 6 gains                    |
| mir-185    | MI0000482 | chr22:18400662-18400743(+) | Variation_30151 | chr22:18386040-18412327 | 1 loss                     |
| mir-185    | MI0000482 | chr22:18400662-18400743(+) | Variation_30152 | chr22:18386040-18426687 | 1 loss                     |
| mir-185    | MI0000482 | chr22:18400662-18400743(+) | Variation_2261  | chr22:18259187-18435258 | 31 losses                  |
| mir-185    | MI0000482 | chr22:18400662-18400743(+) | Variation_5168  | chr22:18267966-18449970 | 6 losses                   |
| mir-1306   | MI0006443 | chr22:18453581-18453665(+) | Variation_31071 | chr22:17399088-19383198 | 6 gains                    |
| mir-1306   | MI0006443 | chr22:18453581-18453665(+) | Variation_4117  | chr22:18406493-18689447 | N.A.                       |

Supplemental Table 2: A list of pre-miRNAs in the CNV regions

| pre-miRNA | MI ID     | pre-miRNA location (hg18)  | CNV ID          | CNV Position (hg18)     | Observed CNVs <sup>a</sup> |
|-----------|-----------|----------------------------|-----------------|-------------------------|----------------------------|
| mir-1306  | MI0006443 | chr22:18453581-18453665(+) | Variation_4117  | chr22:18406493-18689447 | N.A.                       |
| mir-1286  | MI0006348 | chr22:18616657-18616734(-) | Variation_31071 | chr22:17399088-19383198 | 6 gains                    |
| mir-1286  | MI0006348 | chr22:18616657-18616734(-) | Variation_4117  | chr22:18406493-18689447 | N.A.                       |
| mir-1286  | MI0006348 | chr22:18616657-18616734(-) | Variation_4117  | chr22:18406493-18689447 | N.A.                       |
| mir-1286  | MI0006348 | chr22:18616657-18616734(-) | Variation_30157 | chr22:18575591-18624616 | 1 loss                     |
| mir-1286  | MI0006348 | chr22:18616657-18616734(-) | Variation_30154 | chr22:18524663-18624616 | 2 losses                   |
| mir-649   | MI0003664 | chr22:19718465-19718561(-) | Variation_5170  | chr22:19664133-19854524 | 12 gains                   |
| mir-650   | MI0003665 | chr22:21495270-21495365(+) | Variation_9842  | chr22:21475634-21538519 | 1 gain                     |
| mir-650   | MI0003665 | chr22:21495270-21495365(+) | Variation_23326 | chr22:21452288-21569061 | 1 gain                     |
| mir-650   | MI0003665 | chr22:21495270-21495365(+) | Variation_23326 | chr22:21452288-21569061 | 1 gain                     |
| mir-650   | MI0003665 | chr22:21495270-21495365(+) | Variation_2268  | chr22:21394879-21570697 | 35 gains, 32 losses        |
| mir-650   | MI0003665 | chr22:21495270-21495365(+) | Variation_9840  | chr22:21384614-21554058 | 4 gains                    |
| mir-650   | MI0003665 | chr22:21495270-21495365(+) | Variation_7335  | chr22:21488714-21568288 | 45 gains                   |
| mir-650   | MI0003665 | chr22:21495270-21495365(+) | Variation_9839  | chr22:21441861-21554058 | 6 gains                    |
| mir-650   | MI0003665 | chr22:21495270-21495365(+) | Variation_34540 | chr22:20596808-21598390 | 6 gains                    |
| mir-650   | MI0003665 | chr22:21495270-21495365(+) | Variation_2019  | chr22:21032390-21564096 | N.A.                       |
| mir-650   | MI0003665 | chr22:21495270-21495365(+) | Variation_0334  | chr22:21133087-21518308 | 1 loss                     |
| mir-650   | MI0003665 | chr22:21495270-21495365(+) | Variation_0546  | chr22:21481774-21581634 | 1 loss                     |
| mir-650   | MI0003665 | chr22:21495270-21495365(+) | Variation_10613 | chr22:20718332-21506986 | 1 loss                     |
| mir-650   | MI0003665 | chr22:21495270-21495365(+) | Variation_10618 | chr22:21441861-21554058 | 1 loss                     |
| mir-650   | MI0003665 | chr22:21495270-21495365(+) | Variation_10619 | chr22:21475634-21538519 | 1 loss                     |
| mir-650   | MI0003665 | chr22:21495270-21495365(+) | Variation_35986 | chr22:20705862-21573766 | 1 loss                     |
| mir-650   | MI0003665 | chr22:21495270-21495365(+) | Variation_35987 | chr22:20708899-21581181 | 1 loss                     |
| mir-650   | MI0003665 | chr22:21495270-21495365(+) | Variation_35989 | chr22:21023000-21588528 | 1 loss                     |
| mir-650   | MI0003665 | chr22:21495270-21495365(+) | Variation_35996 | chr22:21101787-21584145 | 1 loss                     |
| mir-650   | MI0003665 | chr22:21495270-21495365(+) | Variation_36003 | chr22:21348404-21583220 | 1 loss                     |
| mir-650   | MI0003665 | chr22:21495270-21495365(+) | Variation_36004 | chr22:21359038-21591683 | 1 loss                     |
| mir-650   | MI0003665 | chr22:21495270-21495365(+) | Variation_36005 | chr22:21360350-21602265 | 1 loss                     |
| mir-650   | MI0003665 | chr22:21495270-21495365(+) | Variation_36006 | chr22:21481774-21581634 | 1 loss                     |
| mir-650   | MI0003665 | chr22:21495270-21495365(+) | Variation_36007 | chr22:21487340-21586552 | 1 loss                     |
| mir-650   | MI0003665 | chr22:21495270-21495365(+) | Variation_0818  | chr22:21394879-21570697 | 18 losses                  |
| mir-650   | MI0003665 | chr22:21495270-21495365(+) | Variation_10608 | chr22:21361579-21554058 | 4 losses                   |
| mir-650   | MI0003665 | chr22:21495270-21495365(+) | Variation_10610 | chr22:21046568-21554058 | 4 losses                   |
| mir-650   | MI0003665 | chr22:21495270-21495365(+) | Variation_5177  | chr22:21400751-21552729 | 9 losses                   |
| mir-548j  | MI0006345 | chr22:25281178-25281289(-) | Variation_4121  | chr22:25228499-25359896 | N.A.                       |
| mir-658   | MI0003682 | chr22:36570225-36570324(-) | Variation_4128  | chr22:36333823-36595824 | N.A.                       |
| mir-658   | MI0003682 | chr22:36570225-36570324(-) | Variation_4128  | chr22:36333823-36595824 | N.A.                       |



Supplemental Table 2: A list of pre-miRNAs in the CNV regions

| pre-miRNA  | MI ID     | pre-miRNA location (hg18)   | CNV ID          | CNV Position (hg18)      | Observed CNVs <sup>a</sup> |
|------------|-----------|-----------------------------|-----------------|--------------------------|----------------------------|
| mir-659    | MI0003683 | chr22:36573631-36573727(-)  | Variation_4128  | chr22:36333823-36595824  | N.A.                       |
| mir-659    | MI0003683 | chr22:36573631-36573727(-)  | Variation_4128  | chr22:36333823-36595824  | N.A.                       |
| mir-659    | MI0003683 | chr22:36573631-36573727(-)  | Variation_39315 | chr22:36572839-36574389  | 1 loss                     |
| mir-1249   | MI0006384 | chr22:43975499-43975564(-)  | Variation_4132  | chr22:43952888-44316588  | N.A.                       |
| let-7a-3   | MI0000062 | chr22:44887293-44887366(+)  | Variation_30165 | chr22:44801602-44896746  | 1 loss                     |
| let-7a-3   | MI0000062 | chr22:44887293-44887366(+)  | Variation_30164 | chr22:44854128-44911444  | 2 losses                   |
| let-7b     | MI0000063 | chr22:44888230-44888312(+)  | Variation_30165 | chr22:44801602-44896746  | 1 loss                     |
| let-7b     | MI0000063 | chr22:44888230-44888312(+)  | Variation_30164 | chr22:44854128-44911444  | 2 losses                   |
| mir-1912   | MI0008333 | chrX:113792275-113792354(+) | Variation_7758  | chrX:112815468-114902000 | 4 gains, 9 losses          |
| mir-1264   | MI0003758 | chrX:113793386-113793454(+) | Variation_7758  | chrX:112815468-114902000 | 4 gains, 9 losses          |
| mir-1298   | MI0003938 | chrX:113855906-113856017(+) | Variation_7758  | chrX:112815468-114902000 | 4 gains, 9 losses          |
| mir-1911   | MI0008332 | chrX:113904000-113904079(+) | Variation_7758  | chrX:112815468-114902000 | 4 gains, 9 losses          |
| mir-448    | MI0001637 | chrX:113964273-113964383(+) | Variation_7758  | chrX:112815468-114902000 | 4 gains, 9 losses          |
| mir-513c   | MI0006649 | chrX:146078914-146078997(-) | Variation_3271  | chrX:145931601-146596395 | 1 gain                     |
| mir-513c   | MI0006649 | chrX:146078914-146078997(-) | Variation_8313  | chrX:145956371-146541854 | 1 gain                     |
| mir-513b   | MI0006648 | chrX:146088254-146088337(-) | Variation_3271  | chrX:145931601-146596395 | 1 gain                     |
| mir-513b   | MI0006648 | chrX:146088254-146088337(-) | Variation_8313  | chrX:145956371-146541854 | 1 gain                     |
| mir-513a-1 | MI0003191 | chrX:146102673-146102801(-) | Variation_3271  | chrX:145931601-146596395 | 1 gain                     |
| mir-513a-1 | MI0003191 | chrX:146102673-146102801(-) | Variation_8313  | chrX:145956371-146541854 | 1 gain                     |
| mir-513a-2 | MI0003192 | chrX:146115036-146115162(-) | Variation_3271  | chrX:145931601-146596395 | 1 gain                     |
| mir-513a-2 | MI0003192 | chrX:146115036-146115162(-) | Variation_8313  | chrX:145956371-146541854 | 1 gain                     |
| mir-506    | MI0003193 | chrX:146119930-146120053(-) | Variation_3271  | chrX:145931601-146596395 | 1 gain                     |
| mir-506    | MI0003193 | chrX:146119930-146120053(-) | Variation_8313  | chrX:145956371-146541854 | 1 gain                     |
| mir-507    | MI0003194 | chrX:146120194-146120287(-) | Variation_3271  | chrX:145931601-146596395 | 1 gain                     |
| mir-507    | MI0003194 | chrX:146120194-146120287(-) | Variation_8313  | chrX:145956371-146541854 | 1 gain                     |
| mir-508    | MI0003195 | chrX:146126123-146126237(-) | Variation_3271  | chrX:145931601-146596395 | 1 gain                     |
| mir-508    | MI0003195 | chrX:146126123-146126237(-) | Variation_8313  | chrX:145956371-146541854 | 1 gain                     |
| mir-509-2  | MI0005530 | chrX:146147970-146148060(-) | Variation_3271  | chrX:145931601-146596395 | 1 gain                     |
| mir-509-2  | MI0005530 | chrX:146147970-146148060(-) | Variation_8313  | chrX:145956371-146541854 | 1 gain                     |
| mir-509-3  | MI0005717 | chrX:146148862-146148936(-) | Variation_3271  | chrX:145931601-146596395 | 1 gain                     |
| mir-509-3  | MI0005717 | chrX:146148862-146148936(-) | Variation_8313  | chrX:145956371-146541854 | 1 gain                     |
| mir-509-1  | MI0003196 | chrX:146149742-146149835(-) | Variation_3271  | chrX:145931601-146596395 | 1 gain                     |
| mir-509-1  | MI0003196 | chrX:146149742-146149835(-) | Variation_8313  | chrX:145956371-146541854 | 1 gain                     |
| mir-510    | MI0003197 | chrX:146161545-146161618(-) | Variation_0670  | chrX:146152797-146174575 | 1 gain                     |
| mir-510    | MI0003197 | chrX:146161545-146161618(-) | Variation_3271  | chrX:145931601-146596395 | 1 gain                     |
| mir-510    | MI0003197 | chrX:146161545-146161618(-) | Variation_8313  | chrX:145956371-146541854 | 1 gain                     |
| mir-510    | MI0003197 | chrX:146161545-146161618(-) | Variation_37011 | chrX:146152065-146174575 | 1 gain                     |

**Supplemental Table 2: A list of pre-miRNAs in the CNV regions**

| <b>pre-miRNA</b> | <b>MI ID</b> | <b>pre-miRNA location (hg18)</b> | <b>CNV ID</b>   | <b>CNV Position (hg18)</b> | <b>Observed CNVs<sup>a</sup></b> |
|------------------|--------------|----------------------------------|-----------------|----------------------------|----------------------------------|
| mir-514-1        | MI0003198    | chrX:146168457-146168554(-)      | Variation_0670  | chrX:146152797-146174575   | 1 gain                           |
| mir-514-1        | MI0003198    | chrX:146168457-146168554(-)      | Variation_3271  | chrX:145931601-146596395   | 1 gain                           |
| mir-514-1        | MI0003198    | chrX:146168457-146168554(-)      | Variation_8313  | chrX:145956371-146541854   | 1 gain                           |
| mir-514-1        | MI0003198    | chrX:146168457-146168554(-)      | Variation_37011 | chrX:146152065-146174575   | 1 gain                           |
| mir-514-1        | MI0003198    | chrX:146168457-146168554(-)      | Variation_31570 | chrX:146167253-146176681   | 3 gains                          |
| mir-514-2        | MI0003199    | chrX:146171153-146171240(-)      | Variation_0670  | chrX:146152797-146174575   | 1 gain                           |
| mir-514-2        | MI0003199    | chrX:146171153-146171240(-)      | Variation_3271  | chrX:145931601-146596395   | 1 gain                           |
| mir-514-2        | MI0003199    | chrX:146171153-146171240(-)      | Variation_8313  | chrX:145956371-146541854   | 1 gain                           |
| mir-514-2        | MI0003199    | chrX:146171153-146171240(-)      | Variation_37011 | chrX:146152065-146174575   | 1 gain                           |
| mir-514-2        | MI0003199    | chrX:146171153-146171240(-)      | Variation_31570 | chrX:146167253-146176681   | 3 gains                          |
| mir-514-2        | MI0003199    | chrX:146171153-146171240(-)      | Variation_33184 | chrX:146168796-146175650   | 1 loss                           |
| mir-514-3        | MI0003200    | chrX:146173851-146173938(-)      | Variation_0670  | chrX:146152797-146174575   | 1 gain                           |
| mir-514-3        | MI0003200    | chrX:146173851-146173938(-)      | Variation_3271  | chrX:145931601-146596395   | 1 gain                           |
| mir-514-3        | MI0003200    | chrX:146173851-146173938(-)      | Variation_8313  | chrX:145956371-146541854   | 1 gain                           |
| mir-514-3        | MI0003200    | chrX:146173851-146173938(-)      | Variation_37011 | chrX:146152065-146174575   | 1 gain                           |
| mir-514-3        | MI0003200    | chrX:146173851-146173938(-)      | Variation_31570 | chrX:146167253-146176681   | 3 gains                          |
| mir-514-3        | MI0003200    | chrX:146173851-146173938(-)      | Variation_33184 | chrX:146168796-146175650   | 1 loss                           |
| mir-1184         | MI0006277    | chrX:153768829-153768927(-)      | Variation_23331 | chrX:153662541-154582606   | 1 gain                           |
| mir-1184         | MI0006277    | chrX:154265943-154266041(-)      | Variation_23331 | chrX:153662541-154582606   | 1 gain                           |
| mir-1184         | MI0006277    | chrX:154340372-154340470(+)      | Variation_23331 | chrX:153662541-154582606   | 1 gain                           |
| mir-98           | MI0000100    | chrX:53599909-53600027(-)        | Variation_23256 | chrX:52907733-55696471     | 1 loss                           |
| let-7f-2         | MI0000068    | chrX:53600878-53600960(-)        | Variation_23256 | chrX:52907733-55696471     | 1 loss                           |
| mir-384          | MI0001145    | chrX:76056092-76056179(-)        | Variation_38758 | chrX:76053855-76057477     | 125 gains, 1 loss                |
| mir-384          | MI0001145    | chrX:76056092-76056179(-)        | Variation_3252  | chrX:75986125-76068142     | 2 losses                         |
| mir-651          | MI0003666    | chrX:8055006-8055102(+)          | Variation_8298  | chrX:7790764-8397993       | 1 gain                           |
| mir-651          | MI0003666    | chrX:8055006-8055102(+)          | Variation_9337  | chrX:7970400-8095053       | 1 gain                           |
| mir-651          | MI0003666    | chrX:8055006-8055102(+)          | Variation_34488 | chrX:7405997-8116174       | 3 gains                          |

a: N.A. stands for not available

Supplemental Table 3: SNPs in miRNA target sites based on TargetScanS prediction

Supplemental Table 3: SNPs in miRNA target sites based on TargetScanS prediction

| SNP        | SNP Position (hg18) | TargetScanS Prediction      |
|------------|---------------------|-----------------------------|
| rs3203208  | chr1:1708192        | GNB1:miR-218:1              |
| rs17029653 | chr1:6618080        | DNAJC11:miR-362             |
| rs34335657 | chr1:7750490        | CAMTA1:miR-450              |
| rs2155760  | chr1:10359836       | KIF1B:miR-125/351           |
| rs7511713  | chr1:11006344       | TARDBP:miR-181              |
| rs11807940 | chr1:12190929       | TNFRSF1B:let-7/98           |
| rs11546437 | chr1:15629056       | EFHD2:miR-153               |
| rs11546437 | chr1:15629056       | EFHD2:miR-448               |
| rs3795761  | chr1:15770665       | DNAJC16:miR-375             |
| rs1064042  | chr1:17185261       | ATP13A2:miR-24              |
| rs14087    | chr1:19538138       | CAPZB:miR-331               |
| rs14087    | chr1:19538138       | CAPZB:miR-339               |
| rs1045038  | chr1:20943854       | HP1BP3:miR-433-3p           |
| rs897468   | chr1:22022274       | HSPG2:miR-15/16/195/424/497 |
| rs897468   | chr1:22022274       | HSPG2:miR-503               |
| rs41266043 | chr1:22802104       | EPHA8:miR-33                |
| rs41266043 | chr1:22802104       | EPHA8:miR-129-5p            |
| rs41266043 | chr1:22802104       | EPHA8:miR-450               |
| rs1801930  | chr1:23509101       | HNRPR:miR-452               |
| rs11583293 | chr1:25767240       | LDLRAP1:miR-124.2/506       |
| rs3210937  | chr1:26031797       | FAM54B:miR-7                |
| rs35124746 | chr1:26100082       | STMN1:miR-223               |
| rs1127756  | chr1:26480528       | SH3BGRL3:miR-182            |
| rs1127756  | chr1:26480528       | SH3BGRL3:miR-96             |
| rs61005297 | chr1:26628494       | LIN28:miR-30-5p:2           |
| rs12239134 | chr1:27145451       | NUDC:miR-194                |
| rs34672418 | chr1:27594606       | GPR3:miR-135                |
| rs1043163  | chr1:31965554       | BAI2:miR-122                |
| rs11319887 | chr1:32281377       | KHDRBS1:miR-218             |
| rs12405056 | chr1:32281989       | KHDRBS1:miR-34b             |
| rs35572238 | chr1:35103759       | DLGAP3:miR-133              |
| rs11545215 | chr1:36542735       | THRAP3:miR-23               |
| rs1128665  | chr1:36577899       | STK40:miR-134               |
| rs1046520  | chr1:38047664       | C1orf122:miR-491            |
| rs28418984 | chr1:38282471       | POU3F1:miR-342              |
| rs11538676 | chr1:40478910       | RLF:miR-495:1               |
| rs12117629 | chr1:40861263       | RIMS3:miR-34/449            |
| rs3862220  | chr1:42940454       | YBX1:miR-539                |
| rs35817790 | chr1:42984662       | LEPRE1:miR-9                |
| rs55946822 | chr1:43164540       | SLC2A1:miR-410              |
| rs11933    | chr1:43164649       | SLC2A1:miR-328:2            |
| rs11933    | chr1:43164649       | SLC2A1:miR-148/152          |
| rs14590    | chr1:43943690       | JMJD2A:miR-495              |
| rs59569934 | chr1:44168790       | ST3GAL3:miR-141/200a        |
| rs1859726  | chr1:44168802       | ST3GAL3:miR-369-3p          |
| rs12037843 | chr1:46871532       | ATPAF1:miR-203.1            |
| rs11551135 | chr1:51526180       | C1orf34:miR-99/100          |
| rs41292517 | chr1:51593176       | EPS15:miR-148/152           |
| rs41292517 | chr1:51593176       | EPS15:miR-130/301           |
| rs41292517 | chr1:51593176       | EPS15:miR-19                |

**Supplemental Table 3: SNPs in miRNA target sites based on TargetScanS prediction**

| <b>SNP</b> | <b>SNP Position (hg18)</b> | <b>TargetScanS Prediction</b>              |
|------------|----------------------------|--------------------------------------------|
| rs9662305  | chr1:52325415              | BTF3L4:miR-495                             |
| rs4628     | chr1:56734344              | PPAP2B:miR-224                             |
| rs1052426  | chr1:62401675              | INADL:miR-18                               |
| rs62620019 | chr1:62689369              | USP1:miR-410                               |
| rs1051544  | chr1:84476590              | PRKACB:miR-18                              |
| rs59181885 | chr1:91154255              | ZNF644:miR-539                             |
| rs1050619  | chr1:91921599              | TGFBR3:miR-23                              |
| rs1050619  | chr1:91921599              | TGFBR3:miR-323                             |
| rs35865570 | chr1:94411810              | ARHGAP29:miR-145                           |
| rs35865570 | chr1:94411810              | ARHGAP29:miR-199                           |
| rs3789699  | chr1:95135589              | CNN3:miR-153                               |
| rs10803    | chr1:95135867              | CNN3:miR-200bc/429                         |
| rs41285716 | chr1:99545479              | LPPR4:miR-96:1                             |
| rs34327534 | chr1:99546976              | LPPR4:miR-491                              |
| rs5876     | chr1:100320582             | HIAT1:miR-31                               |
| rs12121012 | chr1:100434180             | DBT:miR-192/215                            |
| rs2518418  | chr1:100779336             | GPR88:miR-137                              |
| rs1056840  | chr1:101479198             | EDG1:miR-17-5p/20/93/106/519.d             |
| rs17019191 | chr1:107825738             | NTNG1:miR-182                              |
| rs12987    | chr1:110367211             | AHCYL1:miR-320                             |
| rs56714545 | chr1:112864937             | WNT2B:miR-130/301                          |
| rs1059479  | chr1:113045415             | RHOC:miR-142-5p                            |
| rs1059479  | chr1:113045415             | RHOC:miR-17-5p/20/93/106/519.d             |
| rs1059479  | chr1:113045415             | RHOC:miR-93/291-3p/294/295/302/372/373/520 |
| rs1059479  | chr1:113045415             | RHOC:miR-138                               |
| rs12723560 | chr1:114109883             | RSBN1:miR-342                              |
| rs34764866 | chr1:114319284             | HIPK1:miR-124.2/506:1                      |
| rs34764866 | chr1:114319284             | HIPK1:miR-124.1:1                          |
| rs2737825  | chr1:148815865             | MCL1:miR-26                                |
| rs10305753 | chr1:149049822             | ARNT:miR-135                               |
| rs10553014 | chr1:149204597             | LASS2:miR-34b                              |
| rs34658364 | chr1:149204595             | LASS2:miR-34b                              |
| rs1802719  | chr1:149306711             | MLLT11:miR-29                              |
| rs12904    | chr1:153373321             | EFNA1:miR-200bc/429                        |
| rs41264227 | chr1:153572821             | ASH1L:miR-329                              |
| rs15408    | chr1:154121398             | SYT11:miR-186                              |
| rs60294423 | chr1:154978950             | HDGF:miR-129-5p                            |
| rs11556953 | chr1:158154993             | TAGLN2:miR-133:1                           |
| rs36076633 | chr1:158155137             | TAGLN2:miR-1/206                           |
| rs2854245  | chr1:158379963             | ATP1A2:miR-26                              |
| rs41265781 | chr1:158450411             | PEA15:miR-338                              |
| rs5778164  | chr1:158661910             | VANGL2:miR-26                              |
| rs9058     | chr1:159408013             | B4GALT3:miR-27:1                           |
| rs9058     | chr1:159408013             | B4GALT3:miR-128                            |
| rs7412853  | chr1:164305923             | FAM78B:miR-384                             |
| rs41270714 | chr1:165777931             | CREG1:miR-135                              |
| rs10044    | chr1:166311363             | IQWD1:miR-186                              |
| rs12091844 | chr1:167699897             | SLC19A2:miR-101                            |
| rs17302346 | chr1:173250166             | MRPS14:miR-27                              |
| rs1053045  | chr1:174180638             | RFWD2:miR-186                              |
| rs41268464 | chr1:179326516             | IER5:miR-200bc/429                         |
| rs57416975 | chr1:181487548             | NMNAT2:miR-539                             |

**Supplemental Table 3: SNPs in miRNA target sites based on TargetScanS prediction**

| <b>SNP</b> | <b>SNP Position (hg18)</b> | <b>TargetScanS Prediction</b>                  |
|------------|----------------------------|------------------------------------------------|
| rs41272542 | chr1:181788123             | SMG7:miR-181                                   |
| rs59035813 | chr1:183336172             | RNF2:miR-24                                    |
| rs56736495 | chr1:184425750             | HMCN1:miR-29                                   |
| rs34333849 | chr1:191047947             | RGS2:miR-96                                    |
| rs34333849 | chr1:191047947             | RGS2:miR-182                                   |
| rs12410992 | chr1:191415808             | B3GALT2:miR-25/32/92/363/367                   |
| rs11313660 | chr1:195393671             | ZBTB41:miR-17-5p/20/93/106/519.d               |
| rs11313660 | chr1:195393671             | ZBTB41:miR-93/291-3p/294/295/302/372/373/520:1 |
| rs35753959 | chr1:198642386             | ZNF281:miR-378                                 |
| rs11542634 | chr1:200118729             | IPO9:miR-503                                   |
| rs1804734  | chr1:201545229             | BTG2:miR-21                                    |
| rs35434297 | chr1:201578020             | FMOD:miR-338                                   |
| rs36012144 | chr1:202363486             | SOX13:miR-203.1                                |
| rs11576112 | chr1:202434090             | GOLT1A:miR-378*                                |
| rs6677458  | chr1:204150416             | SLC26A9:let-7/98                               |
| rs5780659  | chr1:209988055             | LPGAT1:miR-299-5p                              |
| rs35630582 | chr1:209988056             | LPGAT1:miR-299-5p                              |
| rs11588647 | chr1:213475956             | KCNK2:miR-200bc/429                            |
| rs3768024  | chr1:214744731             | ESRRG:miR-369-3p                               |
| rs3768024  | chr1:214744731             | ESRRG:miR-374                                  |
| rs1141265  | chr1:214745759             | ESRRG:miR-324-5p                               |
| rs1141262  | chr1:214746054             | ESRRG:miR-7                                    |
| rs34140107 | chr1:219941461             | DUSP10:miR-129-5p                              |
| rs34140107 | chr1:219941461             | DUSP10:miR-450                                 |
| rs34950696 | chr1:222641463             | WDR26:miR-19                                   |
| rs61835248 | chr1:224400389             | ACBD3:miR-330                                  |
| rs15319    | chr1:243083713             | HNRPU:miR-496                                  |
| rs3193929  | chr1:243083717             | HNRPU:miR-496                                  |
| rs58273005 | chr1:243084101             | HNRPU:miR-224                                  |
| rs12733852 | chr1:245070061             | AHCTF1:miR-490                                 |
| rs6758214  | chr2:9641927               | YWHAQ:miR-139:2                                |
| rs978906   | chr2:11240727              | ROCK2:miR-142-3p:1                             |
| rs13404748 | chr2:16597634              | FAM49A:miR-30-5p                               |
| rs6669     | chr2:20312002              | PUM2:miR-377                                   |
| rs17737058 | chr2:24845073              | NCOA1:miR-488                                  |
| rs35163679 | chr2:25309938              | DNMT3A:miR-200bc/429                           |
| rs6728684  | chr2:26004277              | KIF3C:miR-505                                  |
| rs62128674 | chr2:26465969              | SELL:miR-182                                   |
| rs1049795  | chr2:27385989              | MPV17:miR-491                                  |
| rs2653     | chr2:27453227              | SNX17:miR-331                                  |
| rs1045325  | chr2:27457934              | PPM1G:miR-24                                   |
| rs3087895  | chr2:30235457              | YPEL5:miR-30-5p                                |
| rs56272862 | chr2:32233167              | SPAST:miR-30-5p:1                              |
| rs56272862 | chr2:32233167              | SPAST:miR-486                                  |
| rs11550290 | chr2:36630373              | CRIM1:miR-18                                   |
| rs2160396  | chr2:37332052              | PRKD3:miR-421                                  |
| rs11547145 | chr2:38825742              | SFRS7:miR-30-5p                                |
| rs5546     | chr2:40194892              | SLC8A1:miR-19:1                                |
| rs59794453 | chr2:43304650              | ZFP36L2:miR-375:2                              |
| rs60089722 | chr2:43304650              | ZFP36L2:miR-375:2                              |
| rs57196656 | chr2:43846964              | PLEKHH2:miR-299-3p                             |
| rs34098574 | chr2:46664267              | RHOQ:miR-9                                     |

**Supplemental Table 3: SNPs in miRNA target sites based on TargetScanS prediction**

| <b>SNP</b> | <b>SNP Position (hg18)</b> | <b>TargetScanS Prediction</b>     |
|------------|----------------------------|-----------------------------------|
| rs1051328  | chr2:46982895              | MCFD2:miR-186:1                   |
| rs10196117 | chr2:47155128              | TTC7A:miR-124.2/506               |
| rs28635788 | chr2:47155128              | TTC7A:miR-124.2/506               |
| rs1803209  | chr2:47241073              | CALM2:miR-505                     |
| rs1045881  | chr2:50002476              | NRXN1:miR-339                     |
| rs7573286  | chr2:55053268              | RTN4:miR-182                      |
| rs12477185 | chr2:55630149              | SMEK2:miR-381:1                   |
| rs1061326  | chr2:55947251              | EFEMP1:miR-186:2                  |
| rs2287086  | chr2:60539999              | BCL11A:miR-363:1                  |
| rs1050608  | chr2:61558609              | XPO1:miR-142-3p                   |
| rs12613621 | chr2:63137026              | OTX1:miR-15/16/195/424/497:2      |
| rs12613621 | chr2:63137026              | OTX1:miR-103/107                  |
| rs10618660 | chr2:64174044              | PELI1:miR-142-3p                  |
| rs58250178 | chr2:69551596              | AAK1:miR-496                      |
| rs35261794 | chr2:69554435              | AAK1:miR-205:1                    |
| rs61296228 | chr2:70528078              | TGFA:miR-23                       |
| rs61296228 | chr2:70528078              | TGFA:miR-323                      |
| rs1046157  | chr2:73154050              | RAB11FIP5:miR-142-5p              |
| rs5024140  | chr2:74585726              | PCGF1:miR-23                      |
| rs5024141  | chr2:74585727              | PCGF1:miR-23                      |
| rs17438464 | chr2:86294678              | REEP1:miR-495                     |
| rs15284    | chr2:96735523              | LMAN2L:miR-15/16/195/424/497      |
| rs3792153  | chr2:99383977              | REV1:miR-200bc/429                |
| rs59985221 | chr2:99530403              | AFF3:miR-129-5p                   |
| rs3739008  | chr2:100979000             | NPAS2:miR-17-5p/20/93/106/519.d:1 |
| rs13409873 | chr2:101874641             | MAP4K4:miR-203.1                  |
| rs10622924 | chr2:105876623             | NCK2:miR-25/32/92/363/367         |
| rs33961225 | chr2:105876624             | NCK2:miR-25/32/92/363/367         |
| rs34347764 | chr2:105876706             | NCK2:miR-183                      |
| rs11553853 | chr2:105877068             | NCK2:miR-455                      |
| rs11553853 | chr2:105877068             | NCK2:miR-1/206                    |
| rs1801602  | chr2:106076797             | UXS1:miR-145                      |
| rs35247728 | chr2:111640463             | BCL2L11:miR-376                   |
| rs34871350 | chr2:113137493             | SLC20A1:miR-339                   |
| rs762740   | chr2:127522419             | BIN1:miR-9                        |
| rs56985094 | chr2:131836978             | LOC150786:miR-218                 |
| rs1053679  | chr2:139043384             | LOC339745:miR-124.2/506:1         |
| rs62169202 | chr2:144862118             | ZEB2:miR-369-3p:2                 |
| rs62169202 | chr2:144862118             | ZEB2:miR-200bc/429:5              |
| rs62169203 | chr2:144862630             | ZEB2:miR-25/32/92/363/367         |
| rs11291336 | chr2:152403264             | CACNB4:miR-129-5p                 |
| rs11291336 | chr2:152403264             | CACNB4:miR-182                    |
| rs11291336 | chr2:152403264             | CACNB4:miR-96                     |
| rs2615499  | chr2:156889626             | NR4A2:miR-204/211                 |
| rs11537712 | chr2:158301986             | ACVR1:miR-365                     |
| rs5024424  | chr2:165956317             | SCN2A:miR-101                     |
| rs35272219 | chr2:173625469             | RAPGEF4:miR-203.1                 |
| rs34758049 | chr2:176502032             | KIAA1715:miR-30-3p                |
| rs15515    | chr2:178702454             | DRB1:miR-320                      |
| rs2304340  | chr2:178968628             | OSBPL6:miR-30-3p                  |
| rs4018776  | chr2:181636213             | UBE2E3:miR-384                    |
| rs35185196 | chr2:181636218             | UBE2E3:miR-384                    |

**Supplemental Table 3: SNPs in miRNA target sites based on TargetScanS prediction**

| <b>SNP</b> | <b>SNP Position (hg18)</b> | <b>TargetScanS Prediction</b>  |
|------------|----------------------------|--------------------------------|
| rs1372122  | chr2:182250427             | NEUROD1:miR-153                |
| rs2368335  | chr2:183669913             | DUSP19:miR-374                 |
| rs1054264  | chr2:187253730             | ITGAV:miR-299-3p               |
| rs12392    | chr2:198059774             | HSPD1:miR-1/206                |
| rs55884229 | chr2:201396295             | BZW1:miR-24                    |
| rs17387557 | chr2:206369947             | NRP2:miR-141/200a              |
| rs35564745 | chr2:208336085             | FZD5:miR-24                    |
| rs2292299  | chr2:208336648             | FZD5:miR-381                   |
| rs55977831 | chr2:217249624             | IGFBP5:miR-143                 |
| rs3204750  | chr2:218919561             | PNKD:let-7/98                  |
| rs1043910  | chr2:220112025             | CHPF:miR-139                   |
| rs13385757 | chr2:221993236             | EPHA4:miR-138                  |
| rs60668742 | chr2:222772944             | PAX3:miR-485-5p                |
| rs4586622  | chr2:225045799             | CUL3:miR-181:2                 |
| rs60365791 | chr2:232381635             | COPS7B:miR-486                 |
| rs1063921  | chr2:235068605             | ARL4C:miR-7                    |
| rs2230360  | chr2:241817653             | HDLBP:miR-214                  |
| rs34717483 | chr3:3863718               | LRRN1:miR-369-3p               |
| rs34717483 | chr3:3863718               | LRRN1:miR-374                  |
| rs35018130 | chr3:4863676               | ITPR1:miR-204/211              |
| rs3840229  | chr3:7757488               | GRM7:miR-19                    |
| rs56173829 | chr3:7757494               | GRM7:miR-19                    |
| rs56173829 | chr3:7757494               | GRM7:miR-130/301               |
| rs56173829 | chr3:7757494               | GRM7:miR-17-5p/20/93/106/519.d |
| rs13085756 | chr3:9494746               | SETD5:miR-30-5p:2              |
| rs13085758 | chr3:9494749               | SETD5:miR-30-5p:2              |
| rs35674    | chr3:10343577              | ATP2B2:miR-326                 |
| rs34978212 | chr3:10344893              | ATP2B2:miR-410                 |
| rs930541   | chr3:12200597              | SYN2:miR-335                   |
| rs6771041  | chr3:12201031              | SYN2:miR-34b                   |
| rs3202499  | chr3:13654776              | FBLN2:miR-128                  |
| rs2731309  | chr3:14159097              | TMEM43:miR-194                 |
| rs2731310  | chr3:14159096              | TMEM43:miR-194                 |
| rs10510454 | chr3:16604609              | DAZL:miR-378*                  |
| rs28509419 | chr3:25613194              | RARB:miR-15/16/195/424/497     |
| rs11305471 | chr3:30021347              | RBMS3:miR-320                  |
| rs10696791 | chr3:30021426              | RBMS3:miR-363                  |
| rs11322142 | chr3:30021431              | RBMS3:miR-363                  |
| rs10696791 | chr3:30021426              | RBMS3:miR-129-5p:1             |
| rs11322142 | chr3:30021431              | RBMS3:miR-129-5p:1             |
| rs10696791 | chr3:30021426              | RBMS3:miR-450                  |
| rs11322142 | chr3:30021431              | RBMS3:miR-450                  |
| rs17026326 | chr3:30708360              | TGFBR2:miR-19                  |
| rs17026326 | chr3:30708360              | TGFBR2:miR-130/301             |
| rs35934901 | chr3:30708406              | TGFBR2:miR-410                 |
| rs4678508  | chr3:35702260              | ARPP-21:miR-26                 |
| rs60678416 | chr3:38507503              | ACVR2B:miR-203.1               |
| rs45512996 | chr3:38565195              | SCN5A:let-7/98                 |
| rs45589543 | chr3:38565380              | SCN5A:miR-153                  |
| rs45589543 | chr3:38565380              | SCN5A:miR-448                  |
| rs41310753 | chr3:38565426              | SCN5A:miR-378*                 |
| rs61130760 | chr3:39112444              | WDR48:miR-218                  |

**Supplemental Table 3: SNPs in miRNA target sites based on TargetScanS prediction**

| <b>SNP</b> | <b>SNP Position (hg18)</b> | <b>TargetScanS Prediction</b>              |
|------------|----------------------------|--------------------------------------------|
| rs10717713 | chr3:42226900              | TRAK1:miR-15/16/195/424/497                |
| rs10717713 | chr3:42226900              | TRAK1:miR-503                              |
| rs1804698  | chr3:47603360              | SMARCC1:miR-214                            |
| rs34505792 | chr3:47603389              | SMARCC1:miR-124.1                          |
| rs3731563  | chr3:48174699              | CDC25A:miR-21                              |
| rs3731562  | chr3:48174881              | CDC25A:let-7/98                            |
| rs11914742 | chr3:48484799              | SCOTIN:miR-328                             |
| rs11552766 | chr3:49371656              | RHOA:miR-185                               |
| rs11538154 | chr3:49545869              | DAG1:miR-495                               |
| rs60858854 | chr3:49545874              | DAG1:miR-495                               |
| rs13827    | chr3:49546931              | DAG1:miR-485-5p                            |
| rs35841879 | chr3:49548014              | DAG1:miR-190                               |
| rs11706794 | chr3:51396292              | DOCK3:miR-486                              |
| rs1045656  | chr3:51966631              | PCBP4:miR-9                                |
| rs3733067  | chr3:52265634              | TMEM113:miR-30-5p:1                        |
| rs11626    | chr3:52849024              | TMEM110:miR-141/200a                       |
| rs35455336 | chr3:53296449              | DCP1A:miR-138                              |
| rs35336193 | chr3:53296462              | DCP1A:miR-128                              |
| rs358077   | chr3:55083398              | CACNA2D3:miR-143                           |
| rs56135778 | chr3:57588494              | FAM116A:miR-494                            |
| rs34585452 | chr3:64057869              | PRICKLE2:miR-33                            |
| rs11553627 | chr3:66513369              | LRIG1:let-7/98                             |
| rs17045718 | chr3:67143949              | KBTBD8:miR-181                             |
| rs36084453 | chr3:70099937              | MITF:miR-148/152:2                         |
| rs11542656 | chr3:72507029              | RYBP:miR-381:1                             |
| rs11915062 | chr3:72507354              | RYBP:miR-141/200a                          |
| rs4677160  | chr3:72509591              | RYBP:miR-499:1                             |
| rs58458600 | chr3:88184208              | CGGBP1:miR-18                              |
| rs1063597  | chr3:88186622              | CGGBP1:miR-324-3p                          |
| rs6551275  | chr3:88275113              | ZNF654:miR-153                             |
| rs1058732  | chr3:99998659              | DCBLD2:miR-24                              |
| rs57057801 | chr3:101566905             | TOMM70A:miR-320                            |
| rs1027704  | chr3:101951120             | ABI3BP:miR-181                             |
| rs4061093  | chr3:101951120             | ABI3BP:miR-181                             |
| rs5851223  | chr3:101951118             | ABI3BP:miR-181                             |
| rs1042852  | chr3:106860205             | CBLB:miR-30-5p                             |
| rs7648784  | chr3:114921497             | NAT13:miR-21                               |
| rs63577561 | chr3:115540221             | ZBTB20:miR-129-5p                          |
| rs63142661 | chr3:116922602             | GAP43:miR-370                              |
| rs28399411 | chr3:116922800             | GAP43:miR-25/32/92/363/367                 |
| rs1128154  | chr3:122833306             | HCLS1:miR-103/107                          |
| rs12638966 | chr3:123561298             | CCDC58:miR-24                              |
| rs35400509 | chr3:124110837             | SEMA5B:miR-378                             |
| rs34709307 | chr3:124814466             | MYLK:miR-93/291-3p/294/295/302/372/373/520 |
| rs12199    | chr3:124815150             | MYLK:miR-24                                |
| rs57081065 | chr3:124815581             | MYLK:miR-129-5p                            |
| rs35145256 | chr3:126433474             | ZNF148:miR-370                             |
| rs11434122 | chr3:132203059             | ATP2C1:miR-153                             |
| rs11434122 | chr3:132203059             | ATP2C1:miR-448                             |
| rs3193182  | chr3:134597640             | TMEM108:miR-320                            |
| rs1131974  | chr3:135557624             | AMOTL2:miR-382                             |
| rs17199978 | chr3:137538874             | STAG1:miR-182:2                            |



**Supplemental Table 3: SNPs in miRNA target sites based on TargetScanS prediction**

| <b>SNP</b> | <b>SNP Position (hg18)</b> | <b>TargetScanS Prediction</b>                      |
|------------|----------------------------|----------------------------------------------------|
| rs17199978 | chr3:137538874             | STAG1:miR-96:2                                     |
| rs56336040 | chr3:143511924             | XRN1:miR-505                                       |
| rs1061262  | chr3:147269980             | PLOD2:miR-182                                      |
| rs1061262  | chr3:147269980             | PLOD2:miR-96                                       |
| rs35579941 | chr3:151744480             | SERP1:miR-122                                      |
| rs2686581  | chr3:153663465             | MBNL1:miR-218:1                                    |
| rs1063048  | chr3:153663504             | MBNL1:miR-433-3p                                   |
| rs1801770  | chr3:153663920             | MBNL1:miR-330                                      |
| rs6772662  | chr3:171194515             | TLOC1:miR-124.1                                    |
| rs13087746 | chr3:178224806             | TBL1XR1:miR-34/449                                 |
| rs6769752  | chr3:180788540             | ACTL6A:miR-320                                     |
| rs3209734  | chr3:182177634             | FXR1:miR-7                                         |
| rs1801035  | chr3:185384366             | AP2M1:miR-9                                        |
| rs1057502  | chr3:185384493             | AP2M1:miR-330                                      |
| rs11546693 | chr3:185460132             | CAMK2N2:miR-485-5p:2                               |
| rs63665263 | chr3:185590044             | CHRD:miR-196                                       |
| rs63665263 | chr3:185590044             | CHRD:let-7/98                                      |
| rs7355810  | chr3:186845006             | IGF2BP2:miR-485-5p                                 |
| rs28480687 | chr3:187349461             | DGKG:miR-410                                       |
| rs56220221 | chr3:187349460             | DGKG:miR-410                                       |
| rs4686786  | chr3:187739043             | CRYGS:miR-133                                      |
| rs3206822  | chr3:187990259             | EIF4A2:miR-145                                     |
| rs3206231  | chr3:188419051             | MASP1:miR-125/351                                  |
| rs35861864 | chr3:191097201             | TP73L:miR-101                                      |
| rs568873   | chr3:197262182             | TFRC:miR-145                                       |
| rs56890907 | chr3:198158228             | PIGZ:miR-9                                         |
| rs4865477  | chr4:1785788               | LETM1:miR-1/206                                    |
| rs11549294 | chr4:6935828               | KIAA0232:miR-128                                   |
| rs11549294 | chr4:6935828               | KIAA0232:miR-485-3p                                |
| rs1802032  | chr4:9685225               | WDR1:miR-544                                       |
| rs1388328  | chr4:23404216              | PPARGC1A:miR-33                                    |
| rs1801731  | chr4:24138518              | DHX15:miR-186:1                                    |
| rs1046023  | chr4:24889443              | PI4K2B:miR-124.2/506                               |
| rs58334461 | chr4:37289130              | NM_001085400:miR-17-5p/20/93/106/519.d             |
| rs58334461 | chr4:37289130              | NM_001085400:miR-93/291-3p/294/295/302/372/373/520 |
| rs62307873 | chr4:39501052              | SCC-112:miR-329                                    |
| rs7680422  | chr4:54856274              | PDGFRA:miR-33:1                                    |
| rs12500930 | chr4:62620461              | LPHN3:miR-130/301                                  |
| rs35250360 | chr4:68862243              | YTHDC1:miR-145                                     |
| rs35810012 | chr4:72653064              | SLC4A4:miR-338                                     |
| rs4403012  | chr4:72653252              | SLC4A4:miR-370                                     |
| rs4403013  | chr4:72653320              | SLC4A4:miR-381                                     |
| rs4403014  | chr4:72653325              | SLC4A4:miR-381                                     |
| rs34921070 | chr4:72653321              | SLC4A4:miR-381                                     |
| rs41265675 | chr4:72653335              | SLC4A4:miR-323                                     |
| rs41265675 | chr4:72653335              | SLC4A4:miR-23                                      |
| rs1803390  | chr4:77301700              | SCARB2:miR-142-5p                                  |
| rs4150094  | chr4:78306330              | CCNG2:miR-17-5p/20/93/106/519.d                    |
| rs4150094  | chr4:78306330              | CCNG2:miR-142-5p                                   |
| rs3944     | chr4:83493823              | HNRPD:miR-224                                      |
| rs17703261 | chr4:88277361              | AFF1:miR-19                                        |
| rs34636402 | chr4:88280653              | AFF1:miR-369-3p:1                                  |

**Supplemental Table 3: SNPs in miRNA target sites based on TargetScanS prediction**

| <b>SNP</b> | <b>SNP Position (hg18)</b> | <b>TargetScanS Prediction</b>               |
|------------|----------------------------|---------------------------------------------|
| rs34636402 | chr4:88280653              | AFF1:miR-374:1                              |
| rs35907994 | chr4:88280669              | AFF1:miR-369-3p:4                           |
| rs56202513 | chr4:88280669              | AFF1:miR-369-3p:4                           |
| rs35907994 | chr4:88280669              | AFF1:miR-374:4                              |
| rs56202513 | chr4:88280669              | AFF1:miR-374:4                              |
| rs35907994 | chr4:88280669              | AFF1:miR-410:2                              |
| rs56202513 | chr4:88280669              | AFF1:miR-410:2                              |
| rs1059125  | chr4:89867707              | FAM13A1:miR-130/301                         |
| rs36011297 | chr4:100020327             | EIF4E:miR-330                               |
| rs1803732  | chr4:101088391             | H2AFZ:miR-132/212                           |
| rs1042094  | chr4:102165971             | PPP3CA:miR-103/107                          |
| rs1803231  | chr4:102165975             | PPP3CA:miR-103/107                          |
| rs4365796  | chr4:109189332             | LEF1:miR-363                                |
| rs56095450 | chr4:114523670             | ANK2:miR-495                                |
| rs11268465 | chr4:115042460             | ARSJ:miR-10                                 |
| rs41300351 | chr4:129410761             | PGRMC2:miR-493-5p                           |
| rs3069727  | chr4:130015622             | PHF17:miR-500                               |
| rs10970    | chr4:134331061             | PCDH10:miR-24                               |
| rs1058267  | chr4:134332052             | PCDH10:miR-23                               |
| rs17017380 | chr4:144362051             | USP38:miR-495                               |
| rs34305988 | chr4:146268268             | ABCE1:miR-491                               |
| rs34305988 | chr4:146268268             | ABCE1:miR-299-3p                            |
| rs35984115 | chr4:146268771             | ABCE1:miR-29                                |
| rs36227325 | chr4:146276336             | OTUD4:miR-17-5p/20/93/106/519.d:3           |
| rs36227325 | chr4:146276336             | OTUD4:miR-93/291-3p/294/295/302/372/373/520 |
| rs1063615  | chr4:146276389             | OTUD4:miR-214                               |
| rs60709046 | chr4:149221545             | NR3C2:miR-19                                |
| rs4399968  | chr4:153462774             | FBXW7:miR-338                               |
| rs3841114  | chr4:153462927             | FBXW7:miR-182:1                             |
| rs9631758  | chr4:154478587             | TRIM2:miR-132/212                           |
| rs1071738  | chr4:170085964             | PALLD:miR-182:2                             |
| rs17061725 | chr4:176791216             | GPM6A:miR-330                               |
| rs7661251  | chr4:183960487             | ODZ3:miR-216                                |
| rs11371540 | chr4:183960771             | ODZ3:miR-29                                 |
| rs11542347 | chr4:183960774             | ODZ3:miR-29                                 |
| rs28703245 | chr4:184797906             | RWDD4A:miR-26                               |
| rs2292899  | chr4:185915104             | ACSL1:miR-124.1:1                           |
| rs2292899  | chr4:185915104             | ACSL1:miR-124.2/506:1                       |
| rs2292899  | chr4:185915104             | ACSL1:miR-34b                               |
| rs2292899  | chr4:185915104             | ACSL1:miR-34/449                            |
| rs1804551  | chr4:186305252             | SLC25A4:let-7/98                            |
| rs34952047 | chr5:2799880               | IRX2:miR-330                                |
| rs9332     | chr5:7953712               | MTRR:miR-361                                |
| rs1044405  | chr5:16526310              | FLJ20152:miR-124.2/506                      |
| rs26317    | chr5:16719180              | MYO10:miR-17-5p/20/93/106/519.d             |
| rs1393229  | chr5:17329645              | BASP1:miR-409-3p                            |
| rs1393227  | chr5:17329674              | BASP1:miR-539                               |
| rs2650930  | chr5:17329866              | BASP1:miR-493-5p                            |
| rs2652631  | chr5:17329870              | BASP1:miR-493-5p                            |
| rs17435231 | chr5:32160789              | GOLPH3:miR-375                              |
| rs11555316 | chr5:32636955              | SUB1:miR-135                                |
| rs5867157  | chr5:32822888              | NPR3:miR-496                                |

**Supplemental Table 3: SNPs in miRNA target sites based on TargetScanS prediction**

| <b>SNP</b> | <b>SNP Position (hg18)</b> | <b>TargetScanS Prediction</b>  |
|------------|----------------------------|--------------------------------|
| rs33960342 | chr5:32822889              | NPR3:miR-496                   |
| rs34031034 | chr5:37100871              | NIPBL:miR-324-5p               |
| rs59167521 | chr5:38516856              | LIFR:miR-101                   |
| rs59167521 | chr5:38516856              | LIFR:miR-144:1                 |
| rs36033427 | chr5:38974719              | RICTOR:miR-203.1               |
| rs45622440 | chr5:38974721              | RICTOR:miR-203.1               |
| rs16867891 | chr5:38976307              | RICTOR:miR-326                 |
| rs7723510  | chr5:53216579              | ARL15:miR-186                  |
| rs10033    | chr5:54756680              | PPAP2A:miR-15/16/195/424/497:1 |
| rs4084824  | chr5:55272816              | IL6ST:miR-378                  |
| rs10045390 | chr5:56253098              | MIER3:miR-30-5p:3              |
| rs34018584 | chr5:61717685              | KIF2A:miR-1/206                |
| rs2292152  | chr5:65001534              | SGTB:miR-381                   |
| rs35663374 | chr5:65001531              | SGTB:miR-381                   |
| rs3729983  | chr5:67629538              | PIK3R1:miR-320                 |
| rs5868531  | chr5:67629989              | PIK3R1:miR-153                 |
| rs5868531  | chr5:67629989              | PIK3R1:miR-448                 |
| rs5868532  | chr5:67632926              | PIK3R1:miR-103/107             |
| rs5868532  | chr5:67632926              | PIK3R1:miR-15/16/195/424/497   |
| rs34873643 | chr5:67632927              | PIK3R1:miR-15/16/195/424/497   |
| rs5868532  | chr5:67632926              | PIK3R1:miR-503                 |
| rs34873643 | chr5:67632927              | PIK3R1:miR-503                 |
| rs1643543  | chr5:67633110              | PIK3R1:miR-129-5p:2            |
| rs1664560  | chr5:67633111              | PIK3R1:miR-129-5p:2            |
| rs12518829 | chr5:72420018              | FCHO2:miR-218                  |
| rs2979     | chr5:72836915              | BTF3:miR-361                   |
| rs5744720  | chr5:74930089              | POLK:miR-378                   |
| rs34872448 | chr5:76039697              | IQGAP2:miR-543                 |
| rs11558670 | chr5:77816981              | LHFPL2:miR-24                  |
| rs2241567  | chr5:77820194              | LHFPL2:miR-362                 |
| rs2241568  | chr5:77820189              | LHFPL2:miR-362                 |
| rs2241567  | chr5:77820194              | LHFPL2:miR-205                 |
| rs17206014 | chr5:82912040              | VCAN:miR-203.1                 |
| rs6697     | chr5:95154812              | RHOBTB3:miR-204/211            |
| rs6697     | chr5:95154812              | RHOBTB3:miR-375                |
| rs13857    | chr5:100170983             | ST8SIA4:miR-103/107            |
| rs8488     | chr5:102566651             | HISPPD1:miR-181:1              |
| rs17297682 | chr5:102566693             | HISPPD1:miR-181:2              |
| rs56059589 | chr5:109230778             | MAN2A1:miR-135                 |
| rs11432316 | chr5:112208127             | APC:miR-153:1                  |
| rs34829795 | chr5:112208128             | APC:miR-153:1                  |
| rs11432316 | chr5:112208127             | APC:miR-448                    |
| rs34829795 | chr5:112208128             | APC:miR-448                    |
| rs11432316 | chr5:112208127             | APC:miR-129-5p                 |
| rs34829795 | chr5:112208128             | APC:miR-129-5p                 |
| rs11432316 | chr5:112208127             | APC:miR-450                    |
| rs34829795 | chr5:112208128             | APC:miR-450                    |
| rs6892784  | chr5:112377196             | DCP2:miR-494                   |
| rs13357043 | chr5:112377193             | DCP2:miR-494                   |
| rs10558436 | chr5:122193370             | SNX2:miR-410                   |
| rs1058512  | chr5:125856770             | GRAMD3:miR-15/16/195/424/497   |
| rs57194914 | chr5:132006982             | RAD50:miR-134                  |

**Supplemental Table 3: SNPs in miRNA target sites based on TargetScanS prediction**

| <b>SNP</b> | <b>SNP Position (hg18)</b> | <b>TargetScanS Prediction</b>    |
|------------|----------------------------|----------------------------------|
| rs13169499 | chr5:133943970             | PHF15:miR-338                    |
| rs13160240 | chr5:137116380             | HNRPA0:miR-221/222:1             |
| rs35586116 | chr5:137710669             | FAM53C:miR-125/351               |
| rs1801867  | chr5:138693761             | MATR3:miR-329                    |
| rs1803697  | chr5:139692687             | HBEGF:miR-194:2                  |
| rs1803697  | chr5:139692687             | HBEGF:miR-132/212                |
| rs6866443  | chr5:141512073             | NDFIP1:miR-155                   |
| rs10050933 | chr5:148363748             | SH3TC2:miR-496                   |
| rs3828609  | chr5:149413056             | CSF1R:miR-155                    |
| rs6674     | chr5:149473728             | PDGFRB:miR-30-5p                 |
| rs1045540  | chr5:149913203             | NDST1:miR-137                    |
| rs12109481 | chr5:150068807             | DCTN4:miR-500                    |
| rs62379673 | chr5:150864488             | FAT2:miR-17-5p/20/93/106/519.d:1 |
| rs33935792 | chr5:151022076             | SPARC:miR-452                    |
| rs62382385 | chr5:156123972             | SGCD:miR-361                     |
| rs254682   | chr5:157146075             | CLINT1:miR-433-3p                |
| rs998754   | chr5:161258512             | GABRA1:miR-376c                  |
| rs7443935  | chr5:167622845             | ODZ2:let-7/98                    |
| rs2305737  | chr5:167878839             | RARS:miR-219                     |
| rs60850132 | chr5:170671695             | TLX3:miR-191                     |
| rs34486870 | chr5:171221591             | FBXW11:miR-331                   |
| rs35661076 | chr5:171696199             | SH3PXD2B:miR-96                  |
| rs1058947  | chr5:172127870             | DUSP1:miR-148/152                |
| rs13164819 | chr5:172494171             | LOC153222:miR-129-5p             |
| rs35893717 | chr5:172494403             | LOC153222:miR-128:1              |
| rs35893717 | chr5:172494403             | LOC153222:miR-27:1               |
| rs34366345 | chr5:176731977             | RGS14:miR-324-3p                 |
| rs1049880  | chr5:176955648             | TMED9:miR-499                    |
| rs14801    | chr5:179196851             | SQSTM1:miR-17-5p/20/93/106/519.d |
| rs1803841  | chr5:179595622             | MAPK9:miR-17-5p/20/93/106/519.d  |
| rs59158458 | chr5:179660347             | GFPT2:miR-219                    |
| rs11957870 | chr5:179937346             | CNOT6:miR-130/301:2              |
| rs8790     | chr6:3214817               | C6orf85:miR-218                  |
| rs3813487  | chr6:3215063               | C6orf85:miR-183                  |
| rs41301861 | chr6:3667940               | C6orf145:miR-496                 |
| rs1045385  | chr6:10506102              | TFAP2A:miR-200bc/429:1           |
| rs35188801 | chr6:12272937              | HIVEP1:miR-410                   |
| rs693758   | chr6:13395379              | PHACTR1:miR-496                  |
| rs2205794  | chr6:16256155              | MYLIP:miR-500                    |
| rs3134582  | chr6:16408286              | ATXN1:miR-30-5p:2                |
| rs4134986  | chr6:20600386              | E2F3:miR-140                     |
| rs9261288  | chr6:30145332              | PPP1R11:miR-34/449:1             |
| rs9261288  | chr6:30145332              | PPP1R11:miR-182                  |
| rs9261288  | chr6:30145332              | PPP1R11:miR-96                   |
| rs34534502 | chr6:30260499              | TRIM26:miR-1/206                 |
| rs1802187  | chr6:31935137              | NEU1:miR-125/351                 |
| rs1061938  | chr6:32244008              | AGPAT1:miR-488                   |
| rs1802036  | chr6:32244007              | AGPAT1:miR-488                   |
| rs1047194  | chr6:33288187              | RING1:miR-133                    |
| rs9469922  | chr6:34952979              | C6orf107:miR-378                 |
| rs1051950  | chr6:35573788              | TULP1:miR-134                    |
| rs1804169  | chr6:37250447              | PIM1:miR-328                     |

**Supplemental Table 3: SNPs in miRNA target sites based on TargetScanS prediction**

| <b>SNP</b> | <b>SNP Position (hg18)</b> | <b>TargetScanS Prediction</b>               |
|------------|----------------------------|---------------------------------------------|
| rs35893164 | chr6:37251111              | PIM1:miR-144                                |
| rs35893164 | chr6:37251111              | PIM1:miR-101                                |
| rs35893164 | chr6:37251111              | PIM1:miR-486                                |
| rs35893164 | chr6:37251111              | PIM1:miR-331                                |
| rs57137575 | chr6:37407402              | TBC1D22B:miR-24                             |
| rs57137575 | chr6:37407402              | TBC1D22B:miR-149                            |
| rs804842   | chr6:37713078              | MDGA1:miR-9:1                               |
| rs1214999  | chr6:43696312              | GTPBP2:miR-125/351                          |
| rs34682934 | chr6:44231166              | TMEM63B:miR-148/152                         |
| rs36041587 | chr6:47702213              | CD2AP:miR-181                               |
| rs3088338  | chr6:64482255              | PHF3:miR-496                                |
| rs3193656  | chr6:71327264              | KIAA1411:miR-496                            |
| rs35316430 | chr6:71627287              | SMAP1:miR-339                               |
| rs60499238 | chr6:80681363              | ELOVL4:miR-329                              |
| rs3778198  | chr6:84320700              | SNAP91:miR-384                              |
| rs15310    | chr6:86380699              | SYNCRIP:miR-381:2                           |
| rs16880260 | chr6:88910102              | CNR1:miR-30-5p                              |
| rs1046001  | chr6:89931074              | ACY1L2:miR-384                              |
| rs35789711 | chr6:100097777             | CCNC:miR-133                                |
| rs1049747  | chr6:111322061             | AMD1:miR-7                                  |
| rs1052258  | chr6:118134939             | NUS1:miR-30-5p                              |
| rs1053140  | chr6:118136464             | NUS1:miR-19                                 |
| rs60454232 | chr6:119270760             | ASF1A:miR-93/291-3p/294/295/302/372/373/520 |
| rs12212865 | chr6:121812163             | GJA1:miR-381                                |
| rs11964202 | chr6:122807837             | SERINC1:miR-200bc/429                       |
| rs6908731  | chr6:126401787             | TRMT11:miR-410                              |
| rs34455247 | chr6:131645575             | AKAP7:miR-31                                |
| rs34455247 | chr6:131645575             | AKAP7:miR-182                               |
| rs36028195 | chr6:134349945             | TBPL1:miR-145                               |
| rs34857215 | chr6:134532139             | SGK:miR-382                                 |
| rs10608076 | chr6:136555172             | PDE7B:miR-369-3p:1                          |
| rs10608076 | chr6:136555172             | PDE7B:miR-374                               |
| rs14514    | chr6:136621548             | BCLAF1:miR-374                              |
| rs14072    | chr6:138453631             | PERP:miR-299-5p                             |
| rs60283049 | chr6:145989317             | EPM2A:miR-182                               |
| rs41289353 | chr6:151203861             | PLEKHG1:miR-218                             |
| rs11558463 | chr6:152484616             | SYNE1:miR-543                               |
| rs11558463 | chr6:152484616             | SYNE1:miR-181                               |
| rs1321967  | chr6:153121883             | VIP:miR-27                                  |
| rs1321967  | chr6:153121883             | VIP:miR-30-5p                               |
| rs34431910 | chr6:155196372             | RBM16:miR-493-5p                            |
| rs34431910 | chr6:155196372             | RBM16:miR-223                               |
| rs1804638  | chr6:158977608             | DYNLT1:miR-29                               |
| rs1804050  | chr6:160089797             | WTAP:miR-433-3p                             |
| rs35608645 | chr6:163910999             | QKI:miR-145:2                               |
| rs11546978 | chr7:2669567               | TTYH3:miR-133                               |
| rs13447412 | chr7:5533400               | ACTB:miR-205                                |
| rs11266786 | chr7:5533486               | ACTB:miR-124.1                              |
| rs16871368 | chr7:6408729               | RAC1:miR-495                                |
| rs16871368 | chr7:6408729               | RAC1:miR-194                                |
| rs836552   | chr7:6409069               | RAC1:miR-485-5p                             |
| rs3801455  | chr7:11109747              | PHF14:miR-496                               |

**Supplemental Table 3: SNPs in miRNA target sites based on TargetScanS prediction**

| <b>SNP</b> | <b>SNP Position (hg18)</b> | <b>TargetScanS Prediction</b>              |
|------------|----------------------------|--------------------------------------------|
| rs6959246  | chr7:16468177              | SOSTDC1:miR-203.1                          |
| rs14556    | chr7:16712557              | BZW2:miR-101                               |
| rs28945080 | chr7:16798714              | AGR2:miR-431                               |
| rs35259071 | chr7:19122056              | TWIST1:miR-361                             |
| rs1045957  | chr7:20421339              | ITGB8:miR-19:2                             |
| rs55773150 | chr7:22737929              | IL6:miR-26                                 |
| rs9807     | chr7:26198130              | HNRPA2B1:miR-539                           |
| rs11557711 | chr7:26198127              | HNRPA2B1:miR-539                           |
| rs7786554  | chr7:27099494              | HOXA1:miR-99/100                           |
| rs17449017 | chr7:27099672              | HOXA1:miR-181                              |
| rs41305921 | chr7:27100130              | HOXA1:miR-30-5p                            |
| rs17501104 | chr7:27188448              | HOXA11:miR-23                              |
| rs17501104 | chr7:27188448              | HOXA11:miR-323                             |
| rs3834868  | chr7:29519322              | CHN2:miR-543                               |
| rs35122558 | chr7:32874624              | KBTBD2:miR-155                             |
| rs11538084 | chr7:35910740              | SEPT7:miR-30-5p                            |
| rs1139448  | chr7:41695599              | INHBA:miR-205                              |
| rs56252693 | chr7:44840507              | H2AFV:miR-139                              |
| rs15555    | chr7:44885974              | PURB:miR-17-5p/20/93/106/519.d:1           |
| rs15555    | chr7:44885974              | PURB:miR-93/291-3p/294/295/302/372/373/520 |
| rs3832522  | chr7:44887769              | PURB:miR-129-5p                            |
| rs55714052 | chr7:72588662              | BCL7B:miR-148/152                          |
| rs1059692  | chr7:75771520              | HSPB1:miR-539                              |
| rs1047963  | chr7:77423669              | PHTF2:miR-485-5p                           |
| rs9687     | chr7:77484514              | MAGI2:miR-27                               |
| rs10239654 | chr7:83428167              | SEMA3A:miR-379                             |
| rs1052015  | chr7:90735667              | FZD1:miR-496                               |
| rs2286845  | chr7:93461394              | BET1:miR-1/206                             |
| rs2272282  | chr7:96478213              | DLX6:miR-505                               |
| rs9327     | chr7:97758537              | BRI3:miR-496                               |
| rs1052296  | chr7:98801746              | ARPC1A:miR-542-3p                          |
| rs1804948  | chr7:98892857              | CPSF4:miR-214:2                            |
| rs1136510  | chr7:99869644              | BCDIN3:miR-218                             |
| rs35095297 | chr7:100116401             | PERQ1:miR-181:1                            |
| rs61220096 | chr7:100116855             | PERQ1:miR-132/212                          |
| rs11762601 | chr7:100987767             | EMID2:miR-340                              |
| rs62481785 | chr7:106087352             | FLJ36031:miR-10                            |
| rs62481785 | chr7:106087352             | FLJ36031:miR-125/351                       |
| rs59573982 | chr7:112193225             | TMEM168:miR-135                            |
| rs34249556 | chr7:112247109             | FLJ31818:miR-330                           |
| rs870266   | chr7:112510757             | GPR85:miR-25/32/92/363/367                 |
| rs13225586 | chr7:120175764             | KCND2:miR-363                              |
| rs13225617 | chr7:120175840             | KCND2:miR-200bc/429                        |
| rs34448193 | chr7:128198142             | CALU:miR-409-3p:1                          |
| rs41274233 | chr7:128198200             | CALU:miR-7                                 |
| rs8597     | chr7:128198658             | CALU:miR-335:2                             |
| rs35049738 | chr7:129183018             | NRF1:miR-485-5p                            |
| rs1733860  | chr7:130836535             | PODXL:miR-181                              |
| rs2718145  | chr7:134305178             | CALD1:let-7/98                             |
| rs1137082  | chr7:134305810             | CALD1:miR-27:2                             |
| rs17168525 | chr7:135263802             | MTPN:let-7/98                              |
| rs17168525 | chr7:135263802             | MTPN:miR-181                               |

**Supplemental Table 3: SNPs in miRNA target sites based on TargetScanS prediction**

| <b>SNP</b> | <b>SNP Position (hg18)</b> | <b>TargetScanS Prediction</b>     |
|------------|----------------------------|-----------------------------------|
| rs11347909 | chr7:137210379             | CREB3L2:miR-129-5p                |
| rs11546286 | chr7:137210384             | CREB3L2:miR-129-5p                |
| rs59223079 | chr7:137210383             | CREB3L2:miR-129-5p                |
| rs13233916 | chr7:138524956             | TTC26:miR-124.2/506               |
| rs14250    | chr7:139370114             | PARP12:miR-199                    |
| rs17620927 | chr7:139799780             | MKRN1:miR-17-5p/20/93/106/519.d:1 |
| rs1062892  | chr7:148129059             | CUL1:miR-493-5p                   |
| rs8829     | chr7:148135551             | EZH2:miR-101:2                    |
| rs8829     | chr7:148135551             | EZH2:miR-144                      |
| rs11977913 | chr7:150409114             | TMUB1:miR-27                      |
| rs11977913 | chr7:150409114             | TMUB1:miR-128                     |
| rs12673423 | chr7:151463167             | MLL3:miR-485-3p:2                 |
| rs62481481 | chr7:151463368             | MLL3:miR-490                      |
| rs61043189 | chr7:151464268             | MLL3:miR-130/301                  |
| rs34664602 | chr8:1638873               | DLGAP2:miR-33                     |
| rs34664602 | chr8:1638873               | DLGAP2:miR-129-5p:2               |
| rs34664602 | chr8:1638873               | DLGAP2:miR-450:2                  |
| rs11554626 | chr8:17132040              | CNOT7:miR-363                     |
| rs34341867 | chr8:22334511              | SLC39A14:miR-490                  |
| rs1059594  | chr8:22533745              | KIAA1967:miR-138                  |
| rs7001041  | chr8:22534630              | BIN3:miR-184                      |
| rs13262813 | chr8:23756598              | STC1:miR-9:2                      |
| rs60163317 | chr8:23758153              | STC1:miR-101:1                    |
| rs4056572  | chr8:25341643              | KCTD9:miR-203.1                   |
| rs1058457  | chr8:26571493              | DPYSL2:miR-409-5p                 |
| rs35258691 | chr8:26571486              | DPYSL2:miR-409-5p                 |
| rs11548610 | chr8:38389779              | FGFR1:miR-330                     |
| rs1802265  | chr8:38829418              | TACC1:miR-96:2                    |
| rs11558227 | chr8:42382254              | VDAC3:miR-7                       |
| rs11558227 | chr8:42382254              | VDAC3:miR-9                       |
| rs1056553  | chr8:53188182              | ST18:miR-130/301                  |
| rs11782817 | chr8:57236787              | PLAG1:miR-224                     |
| rs11782817 | chr8:57236787              | PLAG1:miR-128                     |
| rs11782817 | chr8:57236787              | PLAG1:miR-27                      |
| rs11782817 | chr8:57236787              | PLAG1:miR-144                     |
| rs12549293 | chr8:57238522              | PLAG1:miR-19:1                    |
| rs60220895 | chr8:71186929              | NCOA2:miR-448                     |
| rs1802744  | chr8:81111482              | TPD52:miR-103/107                 |
| rs28988885 | chr8:89121270              | MMP16:miR-223:1                   |
| rs62526888 | chr8:91706943              | TMEM64:miR-19                     |
| rs3830308  | chr8:92040248              | EFCBP1:miR-186                    |
| rs34984375 | chr8:92040255              | EFCBP1:miR-186                    |
| rs34984375 | chr8:92040255              | EFCBP1:miR-142-5p                 |
| rs36028712 | chr8:97223966              | GDF6:miR-155                      |
| rs13268309 | chr8:101784552             | PABPC1:miR-129-5p:1               |
| rs11551354 | chr8:102002011             | YWHAZ:miR-30-5p                   |
| rs61058951 | chr8:102769800             | NCALD:miR-19                      |
| rs1802766  | chr8:103730242             | KLF10:miR-19                      |
| rs2809     | chr8:103908539             | AZIN1:miR-96                      |
| rs1053039  | chr8:106885662             | ZFPM2:miR-142-5p:3                |
| rs35654205 | chr8:106885687             | ZFPM2:miR-145                     |
| rs56344098 | chr8:107833601             | OXR1:miR-381                      |

**Supplemental Table 3: SNPs in miRNA target sites based on TargetScanS prediction**

| <b>SNP</b> | <b>SNP Position (hg18)</b> | <b>TargetScanS Prediction</b> |
|------------|----------------------------|-------------------------------|
| rs12542906 | chr8:107833970             | OXR1:miR-7                    |
| rs45624134 | chr8:108332910             | ANGPT1:miR-496                |
| rs36026586 | chr8:108981896             | RSPO2:miR-101                 |
| rs36026586 | chr8:108981896             | RSPO2:miR-144                 |
| rs1045664  | chr8:113304383             | CSMD3:miR-496:1               |
| rs3134037  | chr8:120005452             | TNFRSF11B:miR-216             |
| rs3134038  | chr8:120005457             | TNFRSF11B:miR-216             |
| rs1045923  | chr8:124896020             | FAM91A1:miR-433-3p            |
| rs11539702 | chr8:127634366             | FAM84B:miR-335                |
| rs4736611  | chr8:133927894             | PHF20L1:miR-181               |
| rs41315635 | chr8:141737902             | PTK2:miR-199                  |
| rs5895799  | chr8:145062072             | PLEC1:miR-124.2/506:1         |
| rs11546262 | chr8:145555605             | GPR172A:miR-122               |
| rs17848373 | chr9:2643931               | VLDLR:miR-149                 |
| rs35275364 | chr9:5764270               | KIAA1432:miR-200bc/429        |
| rs35104633 | chr9:5909068               | KIAA2026:miR-132/212          |
| rs62536166 | chr9:8304850               | PTPRD:miR-148/152             |
| rs62536166 | chr9:8304850               | PTPRD:miR-153                 |
| rs35029845 | chr9:14072679              | NFIB:miR-129-5p:1             |
| rs34826751 | chr9:14072836              | NFIB:miR-339:2                |
| rs3209160  | chr9:14608316              | ZDHHC21:miR-196               |
| rs13284437 | chr9:14608930              | ZDHHC21:miR-338               |
| rs3179845  | chr9:16406403              | BNC2:miR-452                  |
| rs41271151 | chr9:23682125              | ELAVL2:miR-30-5p:1            |
| rs7847710  | chr9:23682251              | ELAVL2:miR-203.1              |
| rs13297394 | chr9:32530842              | TOPORS:miR-488                |
| rs1053447  | chr9:35046679              | VCP:miR-410                   |
| rs1053318  | chr9:35046961              | VCP:miR-339                   |
| rs1803193  | chr9:36201913              | CLTA:miR-494:1                |
| rs41278297 | chr9:37428158              | ZBTB5:miR-29:2                |
| rs35012461 | chr9:37500952              | FBXO10:miR-27                 |
| rs41286035 | chr9:72031225              | MAMDC2:miR-217                |
| rs3182600  | chr9:74159224              | ZFAND5:miR-496                |
| rs3182600  | chr9:74159224              | ZFAND5:miR-369-3p             |
| rs58089946 | chr9:94515161              | BICD2:miR-340                 |
| rs3185785  | chr9:95122598              | WNK2:miR-409-5p               |
| rs35142495 | chr9:97248128              | PTCH1:miR-381:1               |
| rs41283642 | chr9:100955708             | TGFBR1:miR-142-3p             |
| rs61478212 | chr9:107192553             | SLC44A1:miR-485-5p            |
| rs11550076 | chr9:109287173             | KLF4:miR-25/32/92/363/367:2   |
| rs11788360 | chr9:109287485             | KLF4:miR-25/32/92/363/367:1   |
| rs28361184 | chr9:110744730             | CTNNAL1:miR-383               |
| rs5843     | chr9:112046241             | TXN:miR-30-3p                 |
| rs12554972 | chr9:115857743             | ZNF618:miR-24*                |
| rs56084401 | chr9:123587535             | DAB2IP:miR-493-5p             |
| rs16912239 | chr9:124621959             | PDCL:miR-30-5p                |
| rs803718   | chr9:124906093             | RABGAP1:miR-329               |
| rs45448502 | chr9:124906091             | RABGAP1:miR-329               |
| rs45610639 | chr9:124906095             | RABGAP1:miR-329               |
| rs57915501 | chr9:124906096             | RABGAP1:miR-329               |
| rs58775479 | chr9:124927522             | STRBP:miR-26:2                |
| rs3842224  | chr9:125183255             | DENND1A:miR-130/301           |



**Supplemental Table 3: SNPs in miRNA target sites based on TargetScanS prediction**

| <b>SNP</b> | <b>SNP Position (hg18)</b> | <b>TargetScanS Prediction</b>                  |
|------------|----------------------------|------------------------------------------------|
| rs1110026  | chr9:126324572             | NR6A1:miR-377                                  |
| rs41274378 | chr9:126324569             | NR6A1:miR-377                                  |
| rs56802879 | chr9:129534766             | TOR2A:miR-380-5p                               |
| rs13298797 | chr9:129909719             | SLC25A25:miR-214                               |
| rs56801132 | chr9:130719172             | LRRC8A:miR-330                                 |
| rs1801987  | chr9:134759673             | TSC1:miR-320:2                                 |
| rs60350364 | chr9:137841332             | CAMSAP1:miR-539                                |
| rs3780189  | chr9:138238037             | QSCN6L1:miR-323                                |
| rs12554630 | chr9:139629474             | ARRDC1:miR-124.2/506                           |
| rs59628511 | chr9:139629475             | ARRDC1:miR-124.2/506                           |
| rs17293531 | chr10:848207               | LARP5:miR-409-5p:1                             |
| rs58712778 | chr10:5490413              | NET1:miR-218                                   |
| rs59371569 | chr10:5490414              | NET1:miR-218                                   |
| rs56784469 | chr10:8156073              | GATA3:miR-433-3p                               |
| rs3839918  | chr10:8156247              | GATA3:miR-27                                   |
| rs12782127 | chr10:8156298              | GATA3:miR-144                                  |
| rs12782127 | chr10:8156298              | GATA3:miR-101                                  |
| rs9702112  | chr10:11413130             | CUGBP2:miR-493-5p                              |
| rs9702112  | chr10:11413130             | CUGBP2:miR-486                                 |
| rs10701445 | chr10:11413424             | CUGBP2:miR-23:2                                |
| rs10701445 | chr10:11413424             | CUGBP2:miR-323:2                               |
| rs3057294  | chr10:11542660             | USP6NL:miR-410                                 |
| rs61048750 | chr10:11542657             | USP6NL:miR-410                                 |
| rs35402411 | chr10:18869232             | CACNB2:miR-543                                 |
| rs5783611  | chr10:18869987             | CACNB2:miR-30-5p                               |
| rs33980121 | chr10:18869988             | CACNB2:miR-30-5p                               |
| rs16921055 | chr10:21110991             | NEBL:miR-410                                   |
| rs34788823 | chr10:21111908             | NEBL:miR-218:2                                 |
| rs1062669  | chr10:21112690             | NEBL:miR-129-5p                                |
| rs1062669  | chr10:21112690             | NEBL:miR-450                                   |
| rs12360165 | chr10:21842520             | FLJ45187:miR-338                               |
| rs12360168 | chr10:21842580             | FLJ45187:miR-93/291-3p/294/295/302/372/373/520 |
| rs12360168 | chr10:21842580             | FLJ45187:miR-130/301:3                         |
| rs12360168 | chr10:21842580             | FLJ45187:miR-19:1                              |
| rs1127941  | chr10:24912575             | ARHGAP21:miR-145                               |
| rs1127941  | chr10:24912575             | ARHGAP21:miR-199                               |
| rs3184313  | chr10:24912974             | ARHGAP21:miR-183                               |
| rs59203025 | chr10:31856614             | ZEB1:miR-150                                   |
| rs11545325 | chr10:35541028             | CREM:miR-153                                   |
| rs11545325 | chr10:35541028             | CREM:miR-448                                   |
| rs2435355  | chr10:42944839             | RET:miR-377                                    |
| rs12779224 | chr10:64236557             | C10orf22:miR-181                               |
| rs1046519  | chr10:64584457             | NRBF2:miR-495                                  |
| rs1046521  | chr10:64584473             | NRBF2:miR-329                                  |
| rs59457804 | chr10:69346428             | SIRT1:miR-30-5p                                |
| rs2234975  | chr10:69348084             | SIRT1:miR-141/200a                             |
| rs34193846 | chr10:72190801             | ADAMTS14:miR-125/351                           |
| rs11192    | chr10:73705722             | DDIT4:miR-433-3p                               |
| rs1052605  | chr10:82268316             | TSPAN14:miR-24                                 |
| rs11817303 | chr10:86268245             | KIAA1128:miR-374                               |
| rs3832648  | chr10:92491648             | HTR7:miR-504                                   |
| rs1138369  | chr10:97912481             | ZNF518:miR-30-5p:2                             |

**Supplemental Table 3: SNPs in miRNA target sites based on TargetScanS prediction**

| <b>SNP</b> | <b>SNP Position (hg18)</b> | <b>TargetScanS Prediction</b>    |
|------------|----------------------------|----------------------------------|
| rs11592969 | chr10:98344802             | PIK3AP1:miR-30-3p                |
| rs1132364  | chr10:101143927            | CNNM1:miR-542-3p                 |
| rs1135170  | chr10:102578873            | PAX2:miR-153                     |
| rs1135170  | chr10:102578873            | PAX2:miR-448                     |
| rs34928771 | chr10:102712639            | C10orf6:miR-130/301:1            |
| rs1057054  | chr10:104230569            | ACTR1A:miR-17-5p/20/93/106/519.d |
| rs3184159  | chr10:104565974            | NM_001083913:miR-128             |
| rs3184159  | chr10:104565974            | NM_001083913:miR-27:2            |
| rs57707166 | chr10:105138640            | TAF5:miR-26                      |
| rs59729564 | chr10:108324167            | SORCS1:miR-452                   |
| rs59729564 | chr10:108324167            | SORCS1:miR-363                   |
| rs59729564 | chr10:108324167            | SORCS1:miR-500                   |
| rs34154255 | chr10:108326704            | SORCS1:miR-383                   |
| rs7834     | chr10:111614759            | XPNPEP1:miR-452                  |
| rs11414194 | chr10:112036254            | MXI1:miR-320:2                   |
| rs2233938  | chr10:112043876            | SMNDC1:miR-143                   |
| rs17235332 | chr10:115584567            | DCLRE1A:miR-155                  |
| rs238739   | chr10:115795379            | ADRB1:miR-30-5p                  |
| rs12774945 | chr10:116613930            | KIAA1600:miR-194                 |
| rs41284400 | chr10:119755562            | RAB11FIP2:miR-15/16/195/424/497  |
| rs3740550  | chr10:119757494            | RAB11FIP2:miR-361                |
| rs578853   | chr10:120784663            | EIF3S10:miR-505                  |
| rs1147627  | chr10:120785256            | EIF3S10:miR-23                   |
| rs1147627  | chr10:120785256            | EIF3S10:miR-323                  |
| rs5788356  | chr10:121205054            | GRK5:miR-23                      |
| rs5788356  | chr10:121205054            | GRK5:miR-323                     |
| rs35819635 | chr10:123228968            | FGFR2:miR-496                    |
| rs41294349 | chr10:123228976            | FGFR2:miR-338                    |
| rs3763763  | chr10:124003594            | TACC2:miR-25/32/92/363/367       |
| rs15151    | chr10:124003927            | TACC2:miR-31                     |
| rs1058510  | chr10:126667068            | NM_001083914:miR-381             |
| rs34107887 | chr10:131525672            | EBF3:miR-145:1                   |
| rs2804005  | chr10:134445693            | INPP5A:miR-485-5p:2              |
| rs1049499  | chr11:484545               | RNH1:miR-142-5p                  |
| rs1049499  | chr11:484545               | RNH1:miR-17-5p/20/93/106/519.d   |
| rs55806563 | chr11:1534268              | DUSP8:miR-410                    |
| rs55806563 | chr11:1534268              | DUSP8:miR-369-3p                 |
| rs55806563 | chr11:1534268              | DUSP8:miR-374                    |
| rs1052593  | chr11:2861449              | CDKN1C:miR-363                   |
| rs9659     | chr11:6189229              | C11orf56:miR-324-3p              |
| rs7487     | chr11:6590765              | TPP1:miR-130/301                 |
| rs4351800  | chr11:7446395              | SYT9:miR-544                     |
| rs1050662  | chr11:8671508              | ST5:miR-146                      |
| rs4698     | chr11:10285343             | ADM:miR-181                      |
| rs1804746  | chr11:10775207             | EIF4G2:miR-381                   |
| rs60084655 | chr11:13709382             | MLSTD2:miR-224                   |
| rs4923029  | chr11:22790705             | GAS2:miR-124.1                   |
| rs4923029  | chr11:22790705             | GAS2:miR-124.2/506               |
| rs17243566 | chr11:26639501             | TMEM16C:miR-19                   |
| rs58597651 | chr11:27635370             | BDNF:miR-495:3                   |
| rs11031785 | chr11:32418069             | WIT1:miR-488                     |
| rs34066019 | chr11:34637413             | EHF:miR-155                      |

**Supplemental Table 3: SNPs in miRNA target sites based on TargetScanS prediction**

| <b>SNP</b> | <b>SNP Position (hg18)</b> | <b>TargetScanS Prediction</b>   |
|------------|----------------------------|---------------------------------|
| rs10551096 | chr11:35598852             | FJX1:miR-17-5p/20/93/106/519.d  |
| rs12271205 | chr11:36441800             | FLJ14213:miR-19                 |
| rs11544603 | chr11:43321201             | API5:miR-330:2                  |
| rs12222637 | chr11:45860385             | CRY2:miR-24                     |
| rs708228   | chr11:57342238             | NM_001085458:miR-29             |
| rs633713   | chr11:58141817             | ZFP91:miR-129-5p                |
| rs1058021  | chr11:60926820             | FLJ12529:miR-361                |
| rs1050059  | chr11:62040026             | AHNAK:miR-17-5p/20/93/106/519.d |
| rs34005543 | chr11:63480219             | NAT11:miR-199                   |
| rs34502085 | chr11:63728474             | STIP1:miR-324-3p                |
| rs1047262  | chr11:63845831             | PRDX5:miR-25/32/92/363/367      |
| rs12223318 | chr11:65566404             | GAL3ST3:miR-24                  |
| rs3831389  | chr11:65800319             | RAB1B:miR-18                    |
| rs1043243  | chr11:65801065             | RAB1B:miR-124.1                 |
| rs1189693  | chr11:66033514             | DPP3:miR-34/449                 |
| rs3212896  | chr11:69176143             | CCND1:miR-338                   |
| rs3179565  | chr11:69908143             | PPFIA1:miR-34/449               |
| rs3182802  | chr11:73066418             | RAB6A:miR-218                   |
| rs11236380 | chr11:74654425             | ARRB1:miR-22                    |
| rs11540515 | chr11:75531268             | UVRAG:miR-125/351               |
| rs2852487  | chr11:77607491             | GAB2:miR-9                      |
| rs34488116 | chr11:85347206             | PICALM:miR-1/206                |
| rs36094205 | chr11:85347218             | PICALM:miR-217                  |
| rs15135    | chr11:86334451             | FZD4:miR-101:2                  |
| rs15135    | chr11:86334451             | FZD4:miR-144:2                  |
| rs61088092 | chr11:86339005             | FZD4:miR-219                    |
| rs3740662  | chr11:86339591             | FZD4:miR-27                     |
| rs34021269 | chr11:86711650             | TMEM135:miR-199                 |
| rs34021269 | chr11:86711650             | TMEM135:miR-145                 |
| rs11574857 | chr11:93919323             | FUT4:miR-23                     |
| rs11574857 | chr11:93919323             | FUT4:miR-323                    |
| rs1130354  | chr11:112786130            | DRD2:miR-326                    |
| rs1048876  | chr11:114552104            | CADM1:miR-124.2/506             |
| rs649555   | chr11:116662588            | BACE1:miR-24*                   |
| rs608176   | chr11:117538999            | SCN2B:miR-141/200a              |
| rs9332868  | chr11:117898633            | MLL:miR-150                     |
| rs35180728 | chr11:117978797            | ARCN1:miR-409-3p                |
| rs35180728 | chr11:117978797            | ARCN1:miR-1/206                 |
| rs60711103 | chr11:118127037            | DDX6:miR-381                    |
| rs1063930  | chr11:118272182            | BCL9L:miR-23                    |
| rs61900003 | chr11:118712580            | RNF26:miR-153                   |
| rs61900003 | chr11:118712580            | RNF26:miR-448                   |
| rs4083121  | chr11:122998651            | NM_020716:miR-376c              |
| rs3737336  | chr11:125335907            | CDON:miR-181                    |
| rs1049496  | chr11:125789619            | ST3GAL4:miR-326                 |
| rs1128334  | chr11:127834169            | ETS1:miR-381                    |
| rs41302401 | chr11:128186433            | FLI1:miR-9                      |
| rs11555857 | chr11:131711301            | HNT:miR-495:2                   |
| rs34429881 | chr12:263637               | JARID1A:miR-194                 |
| rs34429881 | chr12:263637               | JARID1A:miR-132/212:2           |
| rs1042536  | chr12:2783296              | FKBP4:miR-485-5p                |
| rs34524099 | chr12:4280780              | CCND2:miR-191                   |

**Supplemental Table 3: SNPs in miRNA target sites based on TargetScanS prediction**

| <b>SNP</b> | <b>SNP Position (hg18)</b> | <b>TargetScanS Prediction</b>   |
|------------|----------------------------|---------------------------------|
| rs55944753 | chr12:4282996              | CCND2:miR-182:1                 |
| rs55944753 | chr12:4282996              | CCND2:miR-96:1                  |
| rs61635955 | chr12:4792800              | KCNA6:miR-153                   |
| rs61635955 | chr12:4792800              | KCNA6:miR-448                   |
| rs61907267 | chr12:4896527              | KCNA1:miR-409-5p                |
| rs1049342  | chr12:6549558              | CHD4:miR-140                    |
| rs11539540 | chr12:6549558              | CHD4:miR-140                    |
| rs16932921 | chr12:6798830              | CD4:miR-181                     |
| rs56151134 | chr12:6798839              | CD4:miR-221/222                 |
| rs1062836  | chr12:8140317              | NECAP1:miR-143                  |
| rs11052877 | chr12:9796957              | CD69:miR-130/301                |
| rs34166149 | chr12:11935661             | ETV6:miR-369-3p                 |
| rs34166149 | chr12:11935661             | ETV6:miR-374                    |
| rs34166149 | chr12:11935661             | ETV6:miR-410                    |
| rs17848277 | chr12:12165110             | LRP6:miR-183                    |
| rs11544620 | chr12:12688806             | CREBL2:miR-192/215              |
| rs4283039  | chr12:15664744             | EPS8:miR-200bc/429:1            |
| rs34050861 | chr12:22734407             | ETNK1:miR-148/152               |
| rs57976936 | chr12:25253807             | KRAS:miR-200bc/429              |
| rs57976936 | chr12:25253807             | KRAS:miR-193                    |
| rs35415589 | chr12:27846793             | KLHDC5:miR-486                  |
| rs12227395 | chr12:41128411             | PPHLN1:miR-141/200a             |
| rs55774542 | chr12:46524434             | VDR:miR-125/351                 |
| rs3729973  | chr12:47448520             | ADCY6:miR-204/211:1             |
| rs59990555 | chr12:48012593             | C1QL4:miR-27                    |
| rs7132908  | chr12:48549415             | FAIM2:miR-326                   |
| rs1050729  | chr12:48779867             | SMARCD1:miR-214:2               |
| rs36125542 | chr12:48780354             | SMARCD1:miR-223                 |
| rs34307147 | chr12:48780369             | SMARCD1:miR-491                 |
| rs4298982  | chr12:49156696             | LARP4:miR-192/215               |
| rs1061804  | chr12:49925485             | LOC57228:miR-24                 |
| rs12830128 | chr12:50499672             | LOC401720:miR-378               |
| rs5798239  | chr12:51890837             | RARG:miR-331                    |
| rs59318278 | chr12:52159621             | PCBP2:miR-17-5p/20/93/106/519.d |
| rs59318278 | chr12:52159621             | PCBP2:miR-142-5p                |
| rs11554014 | chr12:52735990             | HOXC4:miR-26                    |
| rs4016669  | chr12:52964959             | HNRPA1:miR-135:1                |
| rs14932    | chr12:56210098             | MBD6:miR-150:2                  |
| rs59237119 | chr12:56264700             | KIF5A:miR-124.1                 |
| rs1059477  | chr12:56500153             | CTDSP2:miR-128:2                |
| rs1059477  | chr12:56500153             | CTDSP2:miR-27                   |
| rs11174462 | chr12:61085668             | USP15:miR-181:2                 |
| rs1042741  | chr12:64645530             | HMGA2:miR-7                     |
| rs1042742  | chr12:64645531             | HMGA2:miR-7                     |
| rs1137465  | chr12:65993708             | CAND1:miR-369-3p                |
| rs1137465  | chr12:65993708             | CAND1:miR-374                   |
| rs11613884 | chr12:67950030             | CPSF6:miR-125/351               |
| rs61759448 | chr12:68258913             | FRS2:miR-381:3                  |
| rs503881   | chr12:68259471             | FRS2:miR-145                    |
| rs12813359 | chr12:69034753             | CNOT2:let-7/98                  |
| rs1046209  | chr12:75270302             | OSBPL8:miR-495:2                |
| rs1245667  | chr12:78368592             | SYT1:miR-148/152                |

**Supplemental Table 3: SNPs in miRNA target sites based on TargetScanS prediction**

| <b>SNP</b> | <b>SNP Position (hg18)</b> | <b>TargetScanS Prediction</b>              |
|------------|----------------------------|--------------------------------------------|
| rs13599    | chr12:91061508             | BTG1:miR-93/291-3p/294/295/302/372/373/520 |
| rs1053642  | chr12:92494062             | SOCS2:miR-194                              |
| rs3730188  | chr12:101315989            | IGF1:miR-142-5p                            |
| rs3730223  | chr12:101319491            | IGF1:miR-495                               |
| rs5031032  | chr12:101320262            | IGF1:miR-1/206                             |
| rs5031032  | chr12:101320262            | IGF1:miR-409-3p                            |
| rs2307842  | chr12:102865778            | HSP90B1:miR-223                            |
| rs35780385 | chr12:102865775            | HSP90B1:miR-223                            |
| rs2466551  | chr12:103037048            | NFYB:miR-544                               |
| rs10187    | chr12:107486933            | ISCU:miR-210                               |
| rs1056172  | chr12:108692637            | C12orf34:miR-130/301                       |
| rs11540    | chr12:108963674            | FLJ40142:miR-15/16/195/424/497             |
| rs1985752  | chr12:111431809            | PTPN11:miR-496                             |
| rs1043051  | chr12:114881502            | THRAP2:miR-129-5p:1                        |
| rs1803507  | chr12:119624015            | KIAA0152:miR-330                           |
| rs1045692  | chr12:119686651            | UNQ1887:miR-377                            |
| rs1801011  | chr12:119686894            | UNQ1887:miR-132/212                        |
| rs11538743 | chr13:24813848             | NUPL1:miR-124.1                            |
| rs11538743 | chr13:24813848             | NUPL1:miR-124.2/506                        |
| rs3205058  | chr13:25492399             | ATP8A2:miR-377                             |
| rs9568845  | chr13:32576715             | STARD13:miR-148/152                        |
| rs9568845  | chr13:32576715             | STARD13:miR-130/301                        |
| rs56727582 | chr13:34946516             | MAB21L1:miR-543                            |
| rs3182615  | chr13:35144333             | NBEA:miR-494                               |
| rs45502300 | chr13:35144512             | NBEA:miR-190                               |
| rs17226809 | chr13:38482916             | C13orf23:miR-29                            |
| rs59425570 | chr13:38483166             | C13orf23:miR-124.1                         |
| rs34241243 | chr13:40027924             | FOXO1A:miR-135                             |
| rs17090557 | chr13:40281861             | SLC25A15:miR-125/351                       |
| rs17069218 | chr13:46306351             | HTR2A:miR-103/107                          |
| rs3720     | chr13:49171604             | KPNA3:miR-141/200a                         |
| rs1043729  | chr13:49171832             | KPNA3:miR-19                               |
| rs17073314 | chr13:49171834             | KPNA3:miR-19                               |
| rs7446     | chr13:49173516             | KPNA3:miR-500                              |
| rs9805470  | chr13:50837391             | INTS6:miR-495:1                            |
| rs41286098 | chr13:73166801             | KLF12:miR-542-3p                           |
| rs35549450 | chr13:74758509             | TBC1D4:miR-26                              |
| rs1062733  | chr13:76477491             | FBXL3:miR-142-5p                           |
| rs1062733  | chr13:76477491             | FBXL3:miR-17-5p/20/93/106/519.d            |
| rs56071300 | chr13:78792106             | RBM26:miR-129-5p                           |
| rs59945183 | chr13:79024809             | NDFIP2:miR-135                             |
| rs34421625 | chr13:87129243             | SLITRK5:miR-221/222                        |
| rs57198481 | chr13:87129246             | SLITRK5:miR-221/222                        |
| rs61965610 | chr13:94077468             | GPR180:miR-25/32/92/363/367                |
| rs9556713  | chr13:96843159             | MBNL2:miR-181                              |
| rs9556713  | chr13:96843159             | MBNL2:miR-496:2                            |
| rs15004    | chr13:96844147             | MBNL2:miR-203.1:1                          |
| rs12869870 | chr13:99415306             | ZIC5:miR-34/449                            |
| rs34432115 | chr13:102128835            | TPP2:miR-496:1                             |
| rs35335049 | chr13:105994233            | FLJ10154:miR-488                           |
| rs10555    | chr13:106619235            | LOC728215:miR-205                          |
| rs11545877 | chr13:109600535            | COL4A1:miR-205                             |

**Supplemental Table 3: SNPs in miRNA target sites based on TargetScanS prediction**

| <b>SNP</b> | <b>SNP Position (hg18)</b> | <b>TargetScanS Prediction</b>    |
|------------|----------------------------|----------------------------------|
| rs1052322  | chr14:20554809             | NDRG2:miR-382                    |
| rs1052362  | chr14:20554802             | NDRG2:miR-382                    |
| rs1052904  | chr14:22597718             | ACIN1:miR-142-5p                 |
| rs1052904  | chr14:22597718             | ACIN1:miR-17-5p/20/93/106/519.d  |
| rs11627863 | chr14:23916846             | NFATC4:miR-328                   |
| rs1042762  | chr14:28308306             | FOXP1B:miR-34/449                |
| rs11152    | chr14:30639168             | HECTD1:miR-381                   |
| rs35768266 | chr14:34251051             | CFL2:miR-124.1                   |
| rs35816901 | chr14:38571548             | SEC23A:miR-23                    |
| rs35816901 | chr14:38571548             | SEC23A:miR-323                   |
| rs1053667  | chr14:44612788             | KIAA0423:miR-19                  |
| rs1053667  | chr14:44612788             | KIAA0423:miR-130/301             |
| rs3742542  | chr14:51264583             | FRMD6:miR-183                    |
| rs10321    | chr14:51541139             | C14orf166:miR-186                |
| rs41315098 | chr14:51812345             | PTGDR:miR-365                    |
| rs1134761  | chr14:54011483             | GMFB:miR-145:2                   |
| rs45513892 | chr14:54601279             | C14orf32:miR-219                 |
| rs45589533 | chr14:54605757             | C14orf32:miR-153                 |
| rs17128429 | chr14:54889553             | FBXO34:miR-30-5p                 |
| rs10701991 | chr14:54905463             | KIAA0831:miR-9                   |
| rs57390094 | chr14:56337240             | OTX2:miR-448:2                   |
| rs58246365 | chr14:56337508             | OTX2:miR-374                     |
| rs62004509 | chr14:57100541             | SLC35F4:miR-196                  |
| rs56135834 | chr14:60508882             | TRMT5:miR-205                    |
| rs17099190 | chr14:61283927             | HIF1A:miR-433-3p                 |
| rs8019084  | chr14:61284203             | HIF1A:miR-135                    |
| rs45487994 | chr14:63221119             | SGPP1:miR-25/32/92/363/367       |
| rs12433504 | chr14:66718103             | GPHN:miR-375                     |
| rs10288    | chr14:67283497             | ZFYVE26:miR-29                   |
| rs34495503 | chr14:68331672             | FLJ39779:miR-488                 |
| rs11557771 | chr14:68410996             | ACTN1:miR-218                    |
| rs3209273  | chr14:68411038             | ACTN1:miR-19                     |
| rs45479600 | chr14:70651801             | PCNX:miR-200bc/429               |
| rs1059326  | chr14:74439138             | DLST:miR-133                     |
| rs34247234 | chr14:74620978             | NEK9:miR-9                       |
| rs11557688 | chr14:74621013             | NEK9:miR-24                      |
| rs59771408 | chr14:76561045             | C14orf4:miR-34b                  |
| rs61331403 | chr14:76561046             | C14orf4:miR-34b                  |
| rs7158951  | chr14:76812335             | POMT2:miR-379                    |
| rs225019   | chr14:79733709             | DIO2:miR-141/200a                |
| rs7159052  | chr14:88004195             | PTPN21:miR-30-5p                 |
| rs11548716 | chr14:88692401             | NM_001085471:miR-182             |
| rs11548716 | chr14:88692401             | NM_001085471:miR-96              |
| rs15414    | chr14:89944277             | CALM1:miR-133                    |
| rs1053463  | chr14:90406959             | RPS6KA5:miR-103/107              |
| rs17127097 | chr14:90407216             | RPS6KA5:miR-204/211              |
| rs35979920 | chr14:91505736             | TRIP11:miR-17-5p/20/93/106/519.d |
| rs61698538 | chr14:92777965             | BTBD7:miR-379                    |
| rs35463377 | chr14:94625139             | DICER1:miR-148/152               |
| rs35463377 | chr14:94625139             | DICER1:miR-130/301               |
| rs35463377 | chr14:94625139             | DICER1:miR-19                    |
| rs1044746  | chr14:95080419             | GLRX5:miR-148/152                |

**Supplemental Table 3: SNPs in miRNA target sites based on TargetScanS prediction**

| <b>SNP</b> | <b>SNP Position (hg18)</b> | <b>TargetScanS Prediction</b>  |
|------------|----------------------------|--------------------------------|
| rs56033032 | chr14:96101306             | PAPOLA:miR-490                 |
| rs12147717 | chr14:96103097             | PAPOLA:miR-330                 |
| rs56999125 | chr14:98707712             | BCL11B:miR-544                 |
| rs57547470 | chr14:99814235             | YY1:miR-410                    |
| rs7906     | chr14:99869967             | WARS:miR-125/351               |
| rs1051022  | chr14:99869973             | WARS:miR-125/351               |
| rs6478     | chr14:101759646            | WDR20:miR-369-3p               |
| rs35659612 | chr14:101759644            | WDR20:miR-369-3p               |
| rs6478     | chr14:101759646            | WDR20:miR-374                  |
| rs35659612 | chr14:101759644            | WDR20:miR-374                  |
| rs11704    | chr14:101878408            | C14orf131:miR-23               |
| rs3122381  | chr14:104679988            | JAG2:miR-186:1                 |
| rs4779660  | chr15:32312287             | SLC12A6:miR-96                 |
| rs1059886  | chr15:32459510             | GOLGA8A:miR-25/32/92/363/367:1 |
| rs4144689  | chr15:32606811             | GOLGA8B:miR-19                 |
| rs12101865 | chr15:39847615             | MGA:miR-326                    |
| rs34368044 | chr15:41022788             | UBR1:miR-142-5p                |
| rs34368044 | chr15:41022788             | UBR1:miR-17-5p/20/93/106/519.d |
| rs3209488  | chr15:41850875             | PDIA3:miR-148/152              |
| rs16941208 | chr15:41953122             | FRMD5:miR-539                  |
| rs1804977  | chr15:42641455             | EIF3S1:miR-142-5p              |
| rs58383159 | chr15:45852767             | SEMA6D:miR-409-3p              |
| rs58383159 | chr15:45852767             | SEMA6D:miR-1/206               |
| rs1057636  | chr15:47564249             | FGF7:miR-493-5p                |
| rs1057636  | chr15:47564249             | FGF7:miR-219                   |
| rs59338998 | chr15:48640295             | TRPM7:miR-9:2                  |
| rs9920139  | chr15:52708007             | UNC13C:miR-330                 |
| rs16976737 | chr15:54171090             | RFXDC2:miR-377                 |
| rs3751539  | chr15:57175505             | RNF111:miR-144:2               |
| rs3751539  | chr15:57175505             | RNF111:miR-128                 |
| rs3751539  | chr15:57175505             | RNF111:miR-27:2                |
| rs13498    | chr15:57216106             | MYO1E:miR-101                  |
| rs13498    | chr15:57216106             | MYO1E:miR-144                  |
| rs11553799 | chr15:58426945             | ANXA2:miR-185                  |
| rs58293779 | chr15:60920161             | TLN2:miR-200bc/429             |
| rs62012486 | chr15:63196809             | PDCD7:miR-410                  |
| rs45615538 | chr15:64861144             | SMAD6:miR-25/32/92/363/367     |
| rs62014610 | chr15:65273054             | SMAD3:miR-346                  |
| rs41305272 | chr15:65886497             | MAP2K5:miR-330                 |
| rs56165498 | chr15:66382129             | ITGA11:miR-29                  |
| rs61628540 | chr15:70831616             | ADPGK:miR-1/206                |
| rs1043589  | chr15:71639527             | NPTN:miR-146                   |
| rs2071501  | chr15:72882210             | CSK:miR-216                    |
| rs4401017  | chr15:73098690             | SCAMP5:miR-299-5p              |
| rs17337152 | chr15:73099805             | SCAMP5:miR-218                 |
| rs1062752  | chr15:76977041             | MORF4L1:miR-33                 |
| rs35065650 | chr15:80121884             | RKHD3:miR-26:1                 |
| rs1903     | chr15:81597977             | HDGFRP3:miR-129-5p             |
| rs62019226 | chr15:86322392             | NTRK3:miR-384                  |
| rs1042499  | chr15:88129309             | ANPEP:miR-125/351              |
| rs12148341 | chr15:88424595             | ZNF710:let-7/98                |
| rs35979246 | chr15:97319462             | IGF1R:miR-15/16/195/424/497:1  |

**Supplemental Table 3: SNPs in miRNA target sites based on TargetScanS prediction**

| <b>SNP</b> | <b>SNP Position (hg18)</b> | <b>TargetScanS Prediction</b>   |
|------------|----------------------------|---------------------------------|
| rs35979246 | chr15:97319462             | IGF1R:miR-503                   |
| rs1802604  | chr15:99274190             | ALDH1A3:miR-144                 |
| rs1802604  | chr15:99274190             | ALDH1A3:miR-101                 |
| rs34131715 | chr16:277501               | AXIN1:miR-493-5p:2              |
| rs45530432 | chr16:277656               | AXIN1:miR-128                   |
| rs45598439 | chr16:638401               | C16orf14:miR-128                |
| rs7187345  | chr16:3953930              | ADCY9:miR-7                     |
| rs3169377  | chr16:4373259              | VASN:miR-205:1                  |
| rs59846291 | chr16:5015193              | NAGPA:miR-182                   |
| rs59846291 | chr16:5015193              | NAGPA:miR-96                    |
| rs8191348  | chr16:11680454             | TXNDC11:miR-539                 |
| rs35715530 | chr16:15597464             | KIAA0430:miR-124.2/506          |
| rs12907    | chr16:15726154             | NDE1:miR-28                     |
| rs7764     | chr16:22252692             | POLR3E:miR-504                  |
| rs717632   | chr16:22986297             | USP31:miR-539                   |
| rs3380     | chr16:24133766             | PRKCB1:miR-494                  |
| rs3837785  | chr16:24134462             | PRKCB1:miR-129-5p               |
| rs3837785  | chr16:24134462             | PRKCB1:miR-450                  |
| rs56687328 | chr16:24134558             | PRKCB1:miR-330:2                |
| rs10055    | chr16:24743377             | TNRC6A:miR-30-5p:2              |
| rs34646740 | chr16:29729337             | MAZ:miR-34/449                  |
| rs11558997 | chr16:29729500             | MAZ:miR-331                     |
| rs12831    | chr16:29989062             | ALDOA:miR-122                   |
| rs16952445 | chr16:29989066             | ALDOA:miR-122                   |
| rs1062379  | chr16:29989207             | ALDOA:miR-34/449                |
| rs61764225 | chr16:30033309             | MAPK3:miR-15/16/195/424/497:2   |
| rs61764225 | chr16:30033309             | MAPK3:miR-15/16/195/424/497:1   |
| rs34494127 | chr16:30588903             | FBS1:miR-493-5p                 |
| rs1048622  | chr16:30692947             | RNF40:miR-125/351               |
| rs1048622  | chr16:30692947             | RNF40:miR-331                   |
| rs35676536 | chr16:30692952             | RNF40:miR-331                   |
| rs4617878  | chr16:30698964             | ZNF629:miR-149                  |
| rs1054478  | chr16:49727522             | SALL1:miR-17-5p/20/93/106/519.d |
| rs10653661 | chr16:51029922             | TOX3:miR-23                     |
| rs10653661 | chr16:51029922             | TOX3:miR-323                    |
| rs16745    | chr16:52083232             | AKTIP:miR-101                   |
| rs16745    | chr16:52083232             | AKTIP:miR-144                   |
| rs1799839  | chr16:54097153             | MMP2:miR-29                     |
| rs15104    | chr16:55535157             | HERPUD1:miR-370                 |
| rs9927827  | chr16:65691603             | CBFB:miR-365                    |
| rs35351303 | chr16:65692369             | CBFB:miR-124.1                  |
| rs35351303 | chr16:65692369             | CBFB:miR-124.2/506              |
| rs7203660  | chr16:66949983             | SMPD3:miR-144                   |
| rs3169307  | chr16:67709509             | CTF8:miR-128                    |
| rs57248403 | chr16:68287915             | NFAT5:miR-103/107               |
| rs12232410 | chr16:68294352             | NFAT5:miR-30-5p:2               |
| rs1053412  | chr16:71374408             | ATBF1:miR-542-3p                |
| rs1053410  | chr16:71374584             | ATBF1:miR-129-5p:2              |
| rs3841241  | chr16:71376466             | ATBF1:miR-494:1                 |
| rs12599021 | chr16:75150134             | CNTNAP4:miR-331                 |
| rs59581308 | chr16:78187920             | MAF:miR-410                     |
| rs16974598 | chr16:83370524             | USP10:miR-138                   |



**Supplemental Table 3: SNPs in miRNA target sites based on TargetScanS prediction**

| <b>SNP</b> | <b>SNP Position (hg18)</b> | <b>TargetScanS Prediction</b>                |
|------------|----------------------------|----------------------------------------------|
| rs3210967  | chr16:83566964             | ZDHHC7:miR-148/152                           |
| rs11544837 | chr16:84264538             | KIAA0182:miR-495                             |
| rs1054528  | chr16:85994265             | MAP1LC3B:miR-204/211                         |
| rs2873702  | chr16:85994261             | MAP1LC3B:miR-204/211                         |
| rs1064245  | chr17:591736               | FAM57A:miR-93/291-3p/294/295/302/372/373/520 |
| rs1064245  | chr17:591736               | FAM57A:miR-17-5p/20/93/106/519.d             |
| rs15219    | chr17:1194712              | YWHAE:miR-26                                 |
| rs35409499 | chr17:1272887              | CRK:miR-1/206                                |
| rs3215740  | chr17:1909433              | NM_001098202:miR-328                         |
| rs35019711 | chr17:2174605              | SRR:miR-299-5p                               |
| rs35019711 | chr17:2174605              | SRR:miR-140                                  |
| rs35379403 | chr17:2234121              | MNT:miR-30-3p                                |
| rs55976318 | chr17:2532888              | PAFAH1B1:miR-339                             |
| rs55976318 | chr17:2532888              | PAFAH1B1:miR-10                              |
| rs12150200 | chr17:2883520              | GARNL4:miR-214                               |
| rs2233658  | chr17:4789820              | PFN1:miR-140                                 |
| rs3204914  | chr17:5017940              | USP6:miR-19:2                                |
| rs3204914  | chr17:5017940              | USP6:miR-130/301                             |
| rs3177209  | chr17:7084472              | GABARAP:miR-140                              |
| rs34782008 | chr17:7288506              | FGF11:miR-137                                |
| rs1133249  | chr17:7415883              | SENP3:miR-410                                |
| rs58537439 | chr17:7415883              | SENP3:miR-410                                |
| rs58805209 | chr17:7415885              | SENP3:miR-410                                |
| rs1048750  | chr17:7984600              | PER1:miR-146                                 |
| rs1051780  | chr17:8003781              | VAMP2:miR-34b                                |
| rs1051780  | chr17:8003781              | VAMP2:miR-34/449:1                           |
| rs1140676  | chr17:17029594             | M-RIP:miR-19                                 |
| rs1077790  | chr17:17338614             | RASD1:miR-17-5p/20/93/106/519.d              |
| rs1077790  | chr17:17338614             | RASD1:miR-130/301                            |
| rs9914083  | chr17:17687821             | TOM1L2:miR-19                                |
| rs10648639 | chr17:17910490             | C17orf39:miR-96                              |
| rs10648639 | chr17:17910490             | C17orf39:miR-182                             |
| rs34010550 | chr17:21260985             | KCNJ12:miR-30-5p                             |
| rs56916727 | chr17:22663740             | WSB1:miR-128                                 |
| rs56916727 | chr17:22663740             | WSB1:miR-27                                  |
| rs35381358 | chr17:23679741             | IFT20:miR-129-5p:2                           |
| rs34984874 | chr17:24108534             | C17orf63:miR-129-5p                          |
| rs1064133  | chr17:24965873             | ANKRD13B:miR-421                             |
| rs56295612 | chr17:24977271             | SSH2:miR-421                                 |
| rs35128012 | chr17:25817389             | CPD:miR-331                                  |
| rs3744365  | chr17:30537704             | UNC45B:miR-324-5p                            |
| rs58650684 | chr17:34175710             | PIP5K2B:miR-23                               |
| rs58650684 | chr17:34175710             | PIP5K2B:miR-323                              |
| rs3744348  | chr17:34671101             | FBXL20:miR-326:1                             |
| rs1044675  | chr17:35330858             | ORMDL3:miR-200bc/429                         |
| rs11550320 | chr17:37100703             | EIF1:miR-381                                 |
| rs1804484  | chr17:37100758             | EIF1:miR-25/32/92/363/367                    |
| rs5001709  | chr17:37134071             | HAP1:miR-328                                 |
| rs5001709  | chr17:37134071             | HAP1:miR-339                                 |
| rs3207626  | chr17:37234999             | NT5C3L:miR-323                               |
| rs1042415  | chr17:37530692             | RAB5C:miR-24                                 |
| rs1802740  | chr17:37531149             | RAB5C:miR-18                                 |

**Supplemental Table 3: SNPs in miRNA target sites based on TargetScanS prediction**

| <b>SNP</b> | <b>SNP Position (hg18)</b> | <b>TargetScanS Prediction</b>             |
|------------|----------------------------|-------------------------------------------|
| rs34694406 | chr17:37605734             | STAT5B:miR-141/200a:2                     |
| rs1051166  | chr17:37985114             | LOC162427:miR-27                          |
| rs1051166  | chr17:37985114             | LOC162427:miR-128:2                       |
| rs36087185 | chr17:39441544             | NAGS:miR-135                              |
| rs35468252 | chr17:39469019             | LSM12:miR-188                             |
| rs2903703  | chr17:40828426             | ARHGAP27:miR-23                           |
| rs2903703  | chr17:40828426             | ARHGAP27:miR-323                          |
| rs1047606  | chr17:41463194             | KIAA1267:miR-218                          |
| rs11539536 | chr17:41463300             | KIAA1267:miR-330                          |
| rs1136638  | chr17:43115445             | KPNB1:miR-218                             |
| rs1057111  | chr17:43981705             | HOXB3:miR-342                             |
| rs1057111  | chr17:43981705             | HOXB3:miR-128                             |
| rs1057111  | chr17:43981705             | HOXB3:miR-27                              |
| rs41315066 | chr17:44054687             | HOXB9:miR-151                             |
| rs62062994 | chr17:45616977             | COL1A1:miR-29:1                           |
| rs9398     | chr17:46184799             | CROP:miR-186:2                            |
| rs1802389  | chr17:46184845             | CROP:miR-141/200a                         |
| rs62081794 | chr17:53404880             | VEZF1:miR-495:3                           |
| rs4793924  | chr17:53405033             | VEZF1:miR-1/206                           |
| rs1051424  | chr17:55379106             | RPS6KB1:miR-500                           |
| rs1051424  | chr17:55379106             | RPS6KB1:miR-363:1                         |
| rs1051424  | chr17:55379106             | RPS6KB1:miR-129-5p                        |
| rs1051424  | chr17:55379106             | RPS6KB1:miR-450                           |
| rs1044519  | chr17:57378383             | THRAP1:miR-374                            |
| rs1044519  | chr17:57378383             | THRAP1:miR-369-3p:1                       |
| rs1048045  | chr17:59129220             | LIMD2:miR-24                              |
| rs11545620 | chr17:59926303             | DDX5:miR-325                              |
| rs9925     | chr17:64039429             | PRKAR1A:miR-539                           |
| rs56194813 | chr17:65684270             | KCNJ2:miR-455                             |
| rs57140103 | chr17:65684605             | KCNJ2:miR-193                             |
| rs11555392 | chr17:67634027             | SOX9:miR-495                              |
| rs11448561 | chr17:67634112             | SOX9:miR-381                              |
| rs3178287  | chr17:70643683             | HN1:miR-142-5p                            |
| rs34511924 | chr17:70643677             | HN1:miR-142-5p                            |
| rs3178287  | chr17:70643683             | HN1:miR-17-5p/20/93/106/519.d             |
| rs34511924 | chr17:70643677             | HN1:miR-17-5p/20/93/106/519.d             |
| rs3178287  | chr17:70643683             | HN1:miR-93/291-3p/294/295/302/372/373/520 |
| rs35451907 | chr17:71285185             | H3F3B:miR-192/215                         |
| rs3073415  | chr17:71285962             | H3F3B:miR-10                              |
| rs3073415  | chr17:71285962             | H3F3B:miR-486                             |
| rs2410864  | chr17:71286117             | H3F3B:miR-132/212                         |
| rs1044900  | chr17:71778295             | FAM100B:miR-199                           |
| rs1044900  | chr17:71778295             | FAM100B:miR-145                           |
| rs6728     | chr17:74181828             | PSCD1:miR-10                              |
| rs6728     | chr17:74181828             | PSCD1:miR-339                             |
| rs59650175 | chr17:75421687             | CBX4:miR-129-5p                           |
| rs59650175 | chr17:75421687             | CBX4:miR-450                              |
| rs59650175 | chr17:75421687             | CBX4:miR-363                              |
| rs57367856 | chr17:76055542             | NPTX1:miR-182                             |
| rs57367856 | chr17:76055542             | NPTX1:miR-96                              |
| rs1139414  | chr17:77091694             | ACTG1:miR-186                             |
| rs1140892  | chr17:77091951             | ACTG1:miR-10                              |

**Supplemental Table 3: SNPs in miRNA target sites based on TargetScanS prediction**

| <b>SNP</b> | <b>SNP Position (hg18)</b> | <b>TargetScanS Prediction</b>    |
|------------|----------------------------|----------------------------------|
| rs11549170 | chr17:77091946             | ACTG1:miR-10                     |
| rs11549163 | chr17:77092126             | ACTG1:miR-381:2                  |
| rs56201915 | chr17:77092121             | ACTG1:miR-381:2                  |
| rs11549165 | chr17:77092165             | ACTG1:miR-361                    |
| rs55978907 | chr17:77092170             | ACTG1:miR-361                    |
| rs28478053 | chr17:77092177             | ACTG1:miR-381:1                  |
| rs55978907 | chr17:77092170             | ACTG1:miR-381:1                  |
| rs8069008  | chr17:77135520             | NPLOC4:miR-124.1                 |
| rs9674738  | chr17:77135519             | NPLOC4:miR-124.1                 |
| rs8069008  | chr17:77135520             | NPLOC4:miR-124.2/506             |
| rs9674738  | chr17:77135519             | NPLOC4:miR-124.2/506             |
| rs12190    | chr18:309935               | COLEC12:miR-30-3p                |
| rs59418799 | chr18:8628702              | RAB12:miR-186                    |
| rs3025551  | chr18:9944733              | VAPA:miR-421                     |
| rs14462    | chr18:16784002             | ROCK1:miR-323                    |
| rs17497862 | chr18:23785137             | CDH2:miR-129-5p                  |
| rs61567164 | chr18:23785138             | CDH2:miR-129-5p                  |
| rs1061978  | chr18:27432716             | TTR:miR-141/200a                 |
| rs9950418  | chr18:30722110             | DTNA:miR-19:1                    |
| rs35943974 | chr18:31171008             | ZNF24:miR-34b                    |
| rs60413372 | chr18:33078536             | BRUNOL4:miR-129-5p:2             |
| rs12326122 | chr18:42888443             | HDHD2:miR-326                    |
| rs12326122 | chr18:42888443             | HDHD2:miR-149                    |
| rs3813088  | chr18:46511940             | MAPK4:miR-496                    |
| rs1272363  | chr18:51041939             | NM_001083962:miR-204/211         |
| rs1799409  | chr18:51041935             | NM_001083962:miR-204/211         |
| rs2510125  | chr18:51042359             | NM_001083962:miR-495:3           |
| rs576343   | chr18:53301327             | ONECUT2:miR-9:6                  |
| rs11543269 | chr18:53464995             | ATP8B1:miR-181                   |
| rs41332251 | chr18:55149141             | LMAN1:miR-140                    |
| rs35905430 | chr18:58124119             | KIAA1468:miR-496                 |
| rs28501624 | chr18:58797860             | PHLPP:miR-495:1                  |
| rs4987843  | chr18:58946521             | BCL2:miR-182:2                   |
| rs1055002  | chr18:59208773             | VPS4B:miR-496                    |
| rs35279077 | chr18:66146136             | SOCS6:miR-504                    |
| rs34767247 | chr18:71130294             | TSHZ1:miR-129-5p                 |
| rs34767247 | chr18:71130294             | TSHZ1:miR-450                    |
| rs1065363  | chr19:960919               | C19orf6:miR-124.2/506            |
| rs11550178 | chr19:1208730              | MIDN:miR-17-5p/20/93/106/519.d   |
| rs1801938  | chr19:2052071              | AP3D1:miR-1/206                  |
| rs1801940  | chr19:2052165              | AP3D1:miR-17-5p/20/93/106/519.d  |
| rs1801940  | chr19:2052165              | AP3D1:miR-542-3p                 |
| rs35757137 | chr19:6364851              | KHSRP:miR-129-5p                 |
| rs1049232  | chr19:6702293              | TRIP10:miR-17-5p/20/93/106/519.d |
| rs2307000  | chr19:7835531              | EVI5L:miR-96                     |
| rs2307000  | chr19:7835531              | EVI5L:miR-182                    |
| rs1054621  | chr19:8492147              | MYO1F:let-7/98                   |
| rs45587445 | chr19:10439915             | PDE4A:miR-7                      |
| rs56214729 | chr19:11425661             | ELAVL3:miR-129-5p:2              |
| rs1128572  | chr19:11522116             | CNN1:miR-218                     |
| rs1059298  | chr19:12925418             | RAD23A:miR-361                   |
| rs1059720  | chr19:13902585             | CC2D1A:miR-9                     |

**Supplemental Table 3: SNPs in miRNA target sites based on TargetScanS prediction**

| <b>SNP</b> | <b>SNP Position (hg18)</b> | <b>TargetScanS Prediction</b> |
|------------|----------------------------|-------------------------------|
| rs41296316 | chr19:14064836             | PRKACA:miR-149                |
| rs1803768  | chr19:14487197             | DNAJB1:miR-137                |
| rs11555160 | chr19:15218942             | BRD4:miR-493-5p               |
| rs1045747  | chr19:18149898             | IFI30:miR-29                  |
| rs12610417 | chr19:19477651             | GATAD2A:miR-128               |
| rs12610417 | chr19:19477651             | GATAD2A:miR-27                |
| rs3218074  | chr19:35007016             | CCNE1:miR-15/16/195/424/497:2 |
| rs3218074  | chr19:35007016             | CCNE1:miR-503:2               |
| rs34364406 | chr19:38996519             | KCTD15:miR-378                |
| rs11548915 | chr19:39410703             | LSM14A:miR-144:2              |
| rs1044041  | chr19:39410783             | LSM14A:miR-381:1              |
| rs57512913 | chr19:39411087             | LSM14A:miR-496                |
| rs1802473  | chr19:39652609             | SAE2:miR-133                  |
| rs1063591  | chr19:40209031             | GRAMD1A:miR-133               |
| rs10561    | chr19:40462485             | USF2:miR-186                  |
| rs14724    | chr19:40462482             | USF2:miR-186                  |
| rs3209590  | chr19:40462481             | USF2:miR-186                  |
| rs34766623 | chr19:44361533             | PAK4:miR-24                   |
| rs1049680  | chr19:45576134             | PLD3:miR-9                    |
| rs7259593  | chr19:45638916             | SERTAD3:miR-125/351           |
| rs12982075 | chr19:50575092             | PPP1R13L:miR-124.1            |
| rs12982075 | chr19:50575092             | PPP1R13L:miR-124.2/506        |
| rs28381252 | chr19:50668344             | FOSB:miR-224                  |
| rs1055649  | chr19:52033381             | AP2S1:miR-34b                 |
| rs36119476 | chr19:52624651             | SLC8A2:miR-125/351            |
| rs1052625  | chr19:53990346             | BCAT2:miR-122                 |
| rs1803581  | chr19:54161892             | FTL:miR-22                    |
| rs1803581  | chr19:54161892             | FTL:miR-320                   |
| rs6051679  | chr20:325432               | TRIB3:miR-124.2/506           |
| rs1056976  | chr20:412502               | CSNK2A1:miR-411               |
| rs3209499  | chr20:2077179              | STK35:miR-135                 |
| rs6115979  | chr20:3579701              | ATRN:miR-381                  |
| rs6104808  | chr20:11855137             | BTBD3:let-7/98                |
| rs5840608  | chr20:14253771             | FLRT3:miR-496                 |
| rs34625832 | chr20:14253772             | FLRT3:miR-496                 |
| rs11908381 | chr20:16201299             | C20orf23:miR-433-3p           |
| rs16435    | chr20:23303456             | NAPB:miR-200bc/429            |
| rs11467962 | chr20:23303457             | NAPB:miR-200bc/429            |
| rs3180935  | chr20:25155017             | ENTPD6:miR-24                 |
| rs3208684  | chr20:29716466             | BCL2L1:let-7/98               |
| rs34271817 | chr20:30489193             | ASXL1:miR-7                   |
| rs6088021  | chr20:30901080             | MAPRE1:miR-30-5p              |
| rs1062954  | chr20:31708694             | APBA2BP:miR-125/351:2         |
| rs6141507  | chr20:32764174             | TP53INP2:miR-153              |
| rs6141507  | chr20:32764174             | TP53INP2:miR-448              |
| rs14206    | chr20:33054185             | TRPC4AP:miR-24:2              |
| rs1052062  | chr20:33166894             | EDEM2:miR-199                 |
| rs62206361 | chr20:35584875             | NNAT:miR-488                  |
| rs3180636  | chr20:42681090             | PKIG:miR-377                  |
| rs11471509 | chr20:43137601             | STK4:miR-448                  |
| rs34259011 | chr20:43137602             | STK4:miR-448                  |
| rs1060891  | chr20:43429453             | SYS1:miR-24                   |

**Supplemental Table 3: SNPs in miRNA target sites based on TargetScanS prediction**

| <b>SNP</b> | <b>SNP Position (hg18)</b> | <b>TargetScanS Prediction</b>              |
|------------|----------------------------|--------------------------------------------|
| rs2743430  | chr20:43429868             | SYS1:miR-326                               |
| rs6125065  | chr20:45716821             | NCOA3:miR-24*                              |
| rs2664575  | chr20:47295885             | ZNF1:miR-17-5p/20/93/106/519.d:2           |
| rs2664575  | chr20:47295885             | ZNF1:miR-153                               |
| rs6067490  | chr20:48633727             | PTPN1:miR-1/206                            |
| rs6096082  | chr20:48802663             | PARD6B:miR-205                             |
| rs11469346 | chr20:48803014             | PARD6B:let-7/98                            |
| rs1058282  | chr20:55178980             | BMP7:miR-542-3p                            |
| rs7351122  | chr20:55660128             | TMEPA1:miR-25/32/92/363/367                |
| rs6128327  | chr20:56375963             | RAB22A:miR-30-5p                           |
| rs61713651 | chr20:56453967             | VAPB:miR-376c                              |
| rs61713651 | chr20:56453967             | VAPB:miR-221/222                           |
| rs35295928 | chr20:56687929             | STX16:miR-493-5p                           |
| rs60585835 | chr20:62059092             | ZNF512B:let-7/98:3                         |
| rs34316071 | chr20:62342550             | MYT1:miR-146                               |
| rs56253511 | chr21:10060673             | BAGE5:miR-122                              |
| rs56253511 | chr21:10060673             | BAGE4:miR-122                              |
| rs56253511 | chr21:10060673             | BAGE3:miR-122                              |
| rs56253511 | chr21:10060673             | BAGE2:miR-122                              |
| rs59988518 | chr21:15257131             | NRIP1:miR-490                              |
| rs56741706 | chr21:15257520             | NRIP1:miR-328                              |
| rs3833344  | chr21:17887954             | BTG3:miR-142-5p                            |
| rs58652636 | chr21:17887948             | BTG3:miR-142-5p                            |
| rs2850036  | chr21:34393355             | SLC5A3:miR-124.2/506:1                     |
| rs2843955  | chr21:34395976             | SLC5A3:miR-539                             |
| rs11909973 | chr21:42181394             | C21orf25:miR-182                           |
| rs1058662  | chr21:44230902             | AGPAT3:miR-219                             |
| rs8140743  | chr22:17499645             | DGCR14:miR-130/301                         |
| rs35048893 | chr22:17499642             | DGCR14:miR-130/301                         |
| rs5844430  | chr22:19271324             | PCQAP:miR-125/351                          |
| rs34412877 | chr22:19271327             | PCQAP:miR-125/351                          |
| rs6005034  | chr22:19637397             | CRKL:miR-204/211                           |
| rs6005034  | chr22:19637397             | CRKL:miR-188                               |
| rs5753562  | chr22:20133190             | HIC2:miR-93/291-3p/294/295/302/372/373/520 |
| rs41282589 | chr22:20134488             | HIC2:miR-423                               |
| rs34482610 | chr22:20134518             | HIC2:miR-129-5p:2                          |
| rs34482610 | chr22:20134518             | HIC2:miR-450                               |
| rs9609460  | chr22:20134583             | HIC2:miR-135                               |
| rs11557463 | chr22:20135387             | HIC2:miR-490                               |
| rs41282607 | chr22:20448229             | MAPK1:miR-217                              |
| rs3179038  | chr22:20603809             | PPM1F:miR-299-5p                           |
| rs3876062  | chr22:21988769             | BCR:miR-181                                |
| rs4275     | chr22:25251725             | TPST2:miR-124.2/506                        |
| rs2073859  | chr22:30004553             | LIMK2:miR-135                              |
| rs1802677  | chr22:31588866             | TIMP3:miR-181:1                            |
| rs1801820  | chr22:31999178             | LARGE:miR-30-5p                            |
| rs5755721  | chr22:34120168             | HMOX1:miR-377                              |
| rs8226     | chr22:35007360             | MYH9:miR-124.1                             |
| rs8226     | chr22:35007360             | MYH9:miR-124.2/506                         |
| rs62237489 | chr22:36093966             | LRRC62:miR-25/32/92/363/367                |
| rs12483880 | chr22:36381945             | SH3BP1:miR-31                              |
| rs1054208  | chr22:37016876             | CSNK1E:miR-495                             |

**Supplemental Table 3: SNPs in miRNA target sites based on TargetScanS prediction**

| <b>SNP</b> | <b>SNP Position (hg18)</b> | <b>TargetScanS Prediction</b> |
|------------|----------------------------|-------------------------------|
| rs11548925 | chr22:37016880             | CSNK1E:miR-495                |
| rs11544    | chr22:37209524             | DDX17:miR-26                  |
| rs5757243  | chr22:37411989             | JOSD1:miR-542-3p              |
| rs56111992 | chr22:38415556             | CACNA1I:miR-377               |
| rs4821943  | chr22:39052691             | TNRC6B:miR-384:2              |
| rs139917   | chr22:39053266             | TNRC6B:miR-324-3p             |
| rs12158004 | chr22:39905895             | EP300:miR-129-5p              |
| rs12158004 | chr22:39905895             | EP300:miR-450                 |
| rs56176102 | chr22:40160557             | TOB2:miR-324-3p               |
| rs56034233 | chr22:43656328             | PHF21B:miR-218                |
| rs9614613  | chr22:43959500             | NUP50:miR-10                  |
| rs35783804 | chr22:43961964             | NUP50:miR-182                 |
| rs62231099 | chr22:43961964             | NUP50:miR-182                 |
| rs35783804 | chr22:43961964             | NUP50:miR-96                  |
| rs62231099 | chr22:43961964             | NUP50:miR-96                  |
| rs41279839 | chr22:45452231             | DIP:miR-135                   |
| rs3179     | chr22:45454126             | DIP:miR-543                   |
| rs1053764  | chr22:49232361             | SBF1:miR-30-5p                |
| rs1804459  | chrX:23713995              | SAT1:miR-1/206                |
| rs418560   | chrX:31049688              | DMD:miR-153                   |
| rs5927686  | chrX:31049752              | DMD:miR-139                   |
| rs5927686  | chrX:31049752              | DMD:miR-101                   |
| rs5927686  | chrX:31049752              | DMD:miR-144                   |
| rs708452   | chrX:41094304              | DDX3X:miR-139                 |
| rs14952    | chrX:46959356              | UBE1:miR-324-3p               |
| rs2230265  | chrX:54489231              | FGD1:miR-491                  |
| rs3810701  | chrX:63321797              | FAM123B:miR-34b               |
| rs3810701  | chrX:63321797              | FAM123B:miR-34/449            |
| rs688969   | chrX:67977956              | EFNB1:miR-129-5p              |
| rs3838388  | chrX:67977953              | EFNB1:miR-129-5p              |
| rs20385    | chrX:96743056              | DIAPH2:miR-410                |
| rs1045226  | chrX:102204313             | BEX1:miR-495                  |
| rs1045227  | chrX:102204309             | BEX1:miR-495                  |
| rs14470    | chrX:102519439             | NGFRAP1:miR-144               |
| rs1804033  | chrX:102519436             | NGFRAP1:miR-144               |
| rs14470    | chrX:102519439             | NGFRAP1:miR-128               |
| rs14470    | chrX:102519439             | NGFRAP1:miR-27                |
| rs1064553  | chrX:102817323             | MORF4L2:miR-29                |
| rs2186106  | chrX:117703930             | DOCK11:miR-10                 |
| rs1804954  | chrX:117809964             | IL13RA1:miR-22                |
| rs14279    | chrX:119542689             | CUL4B:miR-494                 |
| rs2281134  | chrX:128756833             | CXorf9:miR-137                |
| rs4020657  | chrX:135783437             | RBMX:miR-129-5p               |
| rs25722    | chrX:146839569             | FMR1:miR-182                  |
| rs25722    | chrX:146839569             | FMR1:miR-96                   |
| rs17426    | chrX:153262810             | EMD:miR-124.1                 |
| rs17427    | chrX:153262811             | EMD:miR-124.1                 |
| rs17426    | chrX:153262810             | EMD:miR-124.2/506             |
| rs17427    | chrX:153262811             | EMD:miR-124.2/506             |
| rs1048969  | chrX:153368910             | SLC10A3:miR-9:2               |
| rs1048969  | chrX:153368910             | SLC10A3:miR-182               |
| rs1048969  | chrX:153368910             | SLC10A3:miR-96                |

**Supplemental Table 3: SNPs in miRNA target sites based on TargetScanS prediction**

| <b>SNP</b> | <b>SNP Position (hg18)</b> | <b>TargetScanS Prediction</b> |
|------------|----------------------------|-------------------------------|
| rs3210290  | chrY:7309562               | PRKY:miR-495                  |
| rs2072126  | chrY:13541140              | DDX3Y:miR-15/16/195/424/497   |
| rs2072126  | chrY:13541140              | DDX3Y:miR-503                 |

©2009 Landes Bioscience.  
Do not distribute.

Supplemental Table 4: SNPs in miRNA target sites based on PITA prediction

Supplemental Table 4: SNPs in miRNA target sites based on PITA prediction

| SNP        | SNP Position (hg18) | PITA Prediction    |
|------------|---------------------|--------------------|
| rs2465136  | chr1:980280         | AGRN:miR-424       |
| rs2465136  | chr1:980280         | AGRN:miR-802       |
| rs13129    | chr1:980702         | AGRN:miR-27a       |
| rs13129    | chr1:980702         | AGRN:miR-27b       |
| rs3831113  | chr1:1467189        | SSU72:miR-153      |
| rs7547323  | chr1:1707890        | GNB1:miR-520f      |
| rs57126490 | chr1:2429929        | PANK4:miR-568      |
| rs35705966 | chr1:7750028        | CAMTA1:miR-126*    |
| rs34335657 | chr1:7750490        | CAMTA1:miR-129     |
| rs41278970 | chr1:8335143        | RERE:miR-609       |
| rs1801785  | chr1:8335239        | RERE:miR-648       |
| rs1052434  | chr1:9833120        | CTNNBIP1:miR-559   |
| rs1052434  | chr1:9833120        | CTNNBIP1:miR-577   |
| rs61776020 | chr1:10444236       | DFFA:miR-632       |
| rs58517232 | chr1:10619316       | CASZ1:miR-26a      |
| rs58517232 | chr1:10619316       | CASZ1:miR-26b      |
| rs59054467 | chr1:10619316       | CASZ1:miR-26a      |
| rs59054467 | chr1:10619316       | CASZ1:miR-26b      |
| rs17848570 | chr1:11089932       | FRAP1:miR-581      |
| rs2754     | chr1:11089939       | FRAP1:miR-144      |
| rs17848571 | chr1:11089963       | FRAP1:miR-646      |
| rs1057081  | chr1:11089999       | FRAP1:miR-199a*    |
| rs41303873 | chr1:11902845       | KIAA2013:miR-150   |
| rs61776476 | chr1:11902858       | KIAA2013:miR-524*  |
| rs11807940 | chr1:12190929       | TNFRSF1B:let-7e    |
| rs7553242  | chr1:15933265       | PLEKHM2:miR-513    |
| rs1060222  | chr1:16138888       | SPEN:miR-612       |
| rs57997135 | chr1:16594583       | C1orf144:miR-569   |
| rs1050027  | chr1:19857460       | NBL1:miR-520a*     |
| rs1050027  | chr1:19857460       | NBL1:miR-525       |
| rs1045038  | chr1:20943854       | HP1BP3:miR-433     |
| rs41265991 | chr1:21777425       | ALPL:miR-583       |
| rs12566171 | chr1:22021617       | LDLRAD2:miR-516-5p |
| rs12566171 | chr1:22021617       | LDLRAD2:miR-594    |
| rs897468   | chr1:22022274       | HSPG2:miR-424      |
| rs2229477  | chr1:22022453       | LDLRAD2:miR-331    |
| rs61732880 | chr1:22022705       | LDLRAD2:miR-34a    |
| rs61732880 | chr1:22022705       | LDLRAD2:miR-34c    |
| rs61732880 | chr1:22022705       | LDLRAD2:miR-449    |
| rs61732880 | chr1:22022705       | LDLRAD2:miR-449b   |
| rs3736360  | chr1:22022707       | LDLRAD2:miR-34a    |
| rs3736360  | chr1:22022707       | LDLRAD2:miR-34c    |
| rs3736360  | chr1:22022707       | LDLRAD2:miR-449    |
| rs3736360  | chr1:22022707       | LDLRAD2:miR-449b   |
| rs3736359  | chr1:22022743       | LDLRAD2:miR-133a   |
| rs3736359  | chr1:22022743       | LDLRAD2:miR-133b   |
| rs3736358  | chr1:22022747       | LDLRAD2:miR-133a   |
| rs3736358  | chr1:22022747       | LDLRAD2:miR-133b   |
| rs3036806  | chr1:22290849       | CDC42:miR-653      |
| rs1064241  | chr1:22290906       | CDC42:miR-532      |



**Supplemental Table 4: SNPs in miRNA target sites based on PITA prediction**

| <b>SNP</b> | <b>SNP Position (hg18)</b> | <b>PITA Prediction</b> |
|------------|----------------------------|------------------------|
| rs28463010 | chr1:22290980              | CDC42:miR-801          |
| rs16826566 | chr1:22291953              | CDC42:miR-659          |
| rs41266043 | chr1:22802104              | EPHA8:miR-33           |
| rs41266043 | chr1:22802104              | EPHA8:miR-129          |
| rs41266949 | chr1:23113780              | EPHB2:miR-568          |
| rs605775   | chr1:23285614              | LUZP1:miR-505          |
| rs10903080 | chr1:24554228              | GRHL3:miR-144          |
| rs1045334  | chr1:24872248              | SRRM1:miR-553          |
| rs4024250  | chr1:24872275              | SRRM1:miR-589          |
| rs34483190 | chr1:25697771              | TMEM57:miR-559         |
| rs11583293 | chr1:25767240              | LDLRAP1:miR-593        |
| rs11583293 | chr1:25767240              | LDLRAP1:miR-506        |
| rs1063721  | chr1:26099649              | STMN1:miR-15a          |
| rs1063721  | chr1:26099649              | STMN1:miR-15b          |
| rs1063721  | chr1:26099649              | STMN1:miR-16           |
| rs1063721  | chr1:26099649              | STMN1:miR-195          |
| rs1063721  | chr1:26099649              | STMN1:miR-497          |
| rs1063721  | chr1:26099649              | STMN1:miR-101          |
| rs1063720  | chr1:26099651              | STMN1:miR-15a          |
| rs1063720  | chr1:26099651              | STMN1:miR-15b          |
| rs1063720  | chr1:26099651              | STMN1:miR-16           |
| rs1063720  | chr1:26099651              | STMN1:miR-195          |
| rs1063720  | chr1:26099651              | STMN1:miR-497          |
| rs1063720  | chr1:26099651              | STMN1:miR-101          |
| rs1063719  | chr1:26099652              | STMN1:miR-15a          |
| rs1063719  | chr1:26099652              | STMN1:miR-15b          |
| rs1063719  | chr1:26099652              | STMN1:miR-16           |
| rs1063719  | chr1:26099652              | STMN1:miR-195          |
| rs1063719  | chr1:26099652              | STMN1:miR-497          |
| rs1063719  | chr1:26099652              | STMN1:miR-101          |
| rs1804097  | chr1:26099941              | STMN1:miR-653          |
| rs1804097  | chr1:26099941              | STMN1:miR-570          |
| rs2275946  | chr1:26250422              | TRIM63:miR-653         |
| rs2275946  | chr1:26250422              | TRIM63:miR-570         |
| rs56325816 | chr1:26321944              | PDIK1L:miR-320         |
| rs56325816 | chr1:26321944              | PDIK1L:miR-548a        |
| rs56325816 | chr1:26321944              | PDIK1L:miR-146a        |
| rs56325816 | chr1:26321944              | PDIK1L:miR-146b        |
| rs17163588 | chr1:26322596              | PDIK1L:miR-592         |
| rs17163868 | chr1:26520968              | AIM1L:miR-562          |
| rs17163868 | chr1:26520968              | AIM1L:miR-581          |
| rs34867130 | chr1:26628492              | LIN28:miR-302a*        |
| rs61005297 | chr1:26628494              | LIN28:miR-302a*        |
| rs61005297 | chr1:26628494              | LIN28:miR-30a-5p       |
| rs61005297 | chr1:26628494              | LIN28:miR-30b          |
| rs61005297 | chr1:26628494              | LIN28:miR-30c          |
| rs61005297 | chr1:26628494              | LIN28:miR-30d          |
| rs61005297 | chr1:26628494              | LIN28:miR-30e-5p       |
| rs11554702 | chr1:26674295              | HMG2:miR-499           |
| rs9725396  | chr1:26674355              | HMG2:miR-621           |
| rs17340420 | chr1:26675052              | HMG2:miR-103           |
| rs17340420 | chr1:26675052              | HMG2:miR-107           |

**Supplemental Table 4: SNPs in miRNA target sites based on PITA prediction**

| <b>SNP</b> | <b>SNP Position (hg18)</b> | <b>PITA Prediction</b> |
|------------|----------------------------|------------------------|
| rs1044113  | chr1:26980121              | ARID1A:miR-577         |
| rs1044113  | chr1:26980121              | ARID1A:miR-559         |
| rs11318    | chr1:27078461              | ATPBD1B:miR-559        |
| rs3177311  | chr1:27078466              | ATPBD1B:miR-559        |
| rs41291070 | chr1:27506354              | WDTC1:miR-24           |
| rs2474285  | chr1:27594214              | GPR3:miR-573           |
| rs34672418 | chr1:27594606              | GPR3:miR-135a          |
| rs34672418 | chr1:27594606              | GPR3:miR-135b          |
| rs1062819  | chr1:27733771              | AHDC1:miR-511          |
| rs1062818  | chr1:27733773              | AHDC1:miR-511          |
| rs34747724 | chr1:27733946              | AHDC1:miR-658          |
| rs8678     | chr1:28400241              | DNAJC8:miR-559         |
| rs8678     | chr1:28400241              | DNAJC8:miR-105         |
| rs9107     | chr1:28699174              | PHACTR4:miR-143        |
| rs11581225 | chr1:28699419              | PHACTR4:miR-7          |
| rs2249138  | chr1:29316310              | EPB41:miR-9            |
| rs5773354  | chr1:31611156              | FABP3:miR-548d         |
| rs36111545 | chr1:31611157              | FABP3:miR-548d         |
| rs1043163  | chr1:31965554              | BAI2:miR-122a          |
| rs11540630 | chr1:32281845              | KHDRBS1:miR-138        |
| rs1054798  | chr1:32281869              | KHDRBS1:miR-17-3p      |
| rs12405056 | chr1:32281989              | KHDRBS1:miR-379        |
| rs8176781  | chr1:32571790              | HDAC1:miR-524*         |
| rs8176780  | chr1:32572278              | MARCKSL1:miR-422b      |
| rs12126851 | chr1:33094383              | S100PBP:miR-182        |
| rs194638   | chr1:33174683              | IBRDC3:miR-190         |
| rs35161004 | chr1:33537522              | FLJ25476:miR-553       |
| rs61801989 | chr1:33752462              | CSMD2:miR-561          |
| rs61801989 | chr1:33752462              | CSMD2:miR-507          |
| rs11807060 | chr1:35103694              | DLGAP3:miR-671         |
| rs35572238 | chr1:35103759              | DLGAP3:miR-659         |
| rs11542799 | chr1:35422348              | SFPQ:miR-186           |
| rs3768339  | chr1:35422589              | SFPQ:miR-509           |
| rs16822444 | chr1:36158341              | EIF2C1:miR-660         |
| rs41308339 | chr1:36160667              | EIF2C1:miR-485-5p      |
| rs35013025 | chr1:36418896              | RPRC1:miR-642          |
| rs35013025 | chr1:36418896              | RPRC1:miR-769-3p       |
| rs41267339 | chr1:38038240              | MANEAL:miR-340         |
| rs28507204 | chr1:38195822              | SF3A3:miR-26a          |
| rs28507204 | chr1:38195822              | SF3A3:miR-26b          |
| rs34934086 | chr1:38262672              | UTP11L:miR-340         |
| rs3839022  | chr1:39724330              | MACF1:miR-655          |
| rs11538676 | chr1:40478910              | RLF:miR-495            |
| rs11417187 | chr1:42417572              | FOXJ3:miR-548a         |
| rs12565898 | chr1:42417924              | FOXJ3:miR-32           |
| rs3831262  | chr1:42653428              | FAM80A:miR-609         |
| rs35585609 | chr1:42653429              | FAM80A:miR-609         |
| rs5773777  | chr1:42653430              | FAM80A:miR-609         |
| rs41307904 | chr1:42940331              | YBX1:miR-95            |
| rs35817790 | chr1:42984662              | LEPRE1:miR-9           |
| rs1803655  | chr1:43164501              | SLC2A1:miR-656         |
| rs55946822 | chr1:43164540              | SLC2A1:miR-568         |

**Supplemental Table 4: SNPs in miRNA target sites based on PITA prediction**

| <b>SNP</b> | <b>SNP Position (hg18)</b> | <b>PITA Prediction</b> |
|------------|----------------------------|------------------------|
| rs2229684  | chr1:43165239              | SLC2A1:miR-626         |
| rs45593643 | chr1:43601942              | ELOVL1:miR-518c*       |
| rs17850048 | chr1:43689520              | KIAA0467:miR-663       |
| rs17850049 | chr1:43689713              | KIAA0467:miR-143       |
| rs2251802  | chr1:43690224              | KIAA0467:miR-193b      |
| rs12561948 | chr1:44168783              | ST3GAL3:miR-768-5p     |
| rs1859726  | chr1:44168802              | ST3GAL3:miR-655        |
| rs1859726  | chr1:44168802              | ST3GAL3:miR-369-3p     |
| rs14084    | chr1:44216285              | ATP6V0B:miR-564        |
| rs8494     | chr1:44216301              | ATP6V0B:miR-577        |
| rs34546933 | chr1:46281802              | PIK3R3:miR-136         |
| rs35840711 | chr1:46796638              | MKNK1:miR-204          |
| rs35840711 | chr1:46796638              | MKNK1:miR-211          |
| rs1801800  | chr1:46913509              | KIAA0494:miR-671       |
| rs1801799  | chr1:46913573              | KIAA0494:miR-653       |
| rs1801799  | chr1:46913573              | KIAA0494:miR-142-5p    |
| rs1801801  | chr1:46913663              | KIAA0494:miR-425-3p    |
| rs10198    | chr1:47615940              | CMPK:miR-142-5p        |
| rs10198    | chr1:47615940              | CMPK:miR-577           |
| rs10198    | chr1:47615940              | CMPK:miR-559           |
| rs5774086  | chr1:50656403              | DMRTA2:miR-582         |
| rs56890493 | chr1:51510129              | RNF11:miR-655          |
| rs41292517 | chr1:51593176              | EPS15:miR-527          |
| rs35602175 | chr1:51593973              | EPS15:miR-205          |
| rs36048901 | chr1:51594553              | EPS15:miR-200b         |
| rs36048901 | chr1:51594553              | EPS15:miR-200c         |
| rs36048901 | chr1:51594553              | EPS15:miR-429          |
| rs9436905  | chr1:51594718              | EPS15:miR-361          |
| rs58589175 | chr1:52026598              | OSBPL9:miR-591         |
| rs34249507 | chr1:53061562              | ZYG11B:miR-186         |
| rs56917927 | chr1:53231938              | SCP2:miR-640           |
| rs57641470 | chr1:53484736              | LRP8:miR-517*          |
| rs7524477  | chr1:54335032              | C1orf83:miR-27a        |
| rs7524477  | chr1:54335032              | C1orf83:miR-27b        |
| rs7527305  | chr1:54335554              | C1orf83:miR-126*       |
| rs34841145 | chr1:55305120              | USP24:miR-186          |
| rs28584740 | chr1:55305181              | USP24:miR-221          |
| rs4628     | chr1:56734344              | PPAP2B:miR-610         |
| rs2654     | chr1:59019835              | JUN:miR-650            |
| rs11423561 | chr1:61693775              | NFIA:miR-605           |
| rs11423561 | chr1:61693775              | NFIA:miR-548c          |
| rs34375141 | chr1:61693776              | NFIA:miR-605           |
| rs34375141 | chr1:61693776              | NFIA:miR-548c          |
| rs11539585 | chr1:61919607              | TM2D1:miR-607          |
| rs1052426  | chr1:62401675              | INADL:miR-18a          |
| rs1052426  | chr1:62401675              | INADL:miR-18b          |
| rs62620019 | chr1:62689369              | USP1:miR-568           |
| rs35163621 | chr1:63810891              | KIAA1799:miR-448       |
| rs17126892 | chr1:64930048              | CACHD1:miR-136         |
| rs17126892 | chr1:64930048              | CACHD1:miR-205         |
| rs1926303  | chr1:64931312              | CACHD1:miR-584         |
| rs9128     | chr1:65071559              | JAK1:miR-588           |

**Supplemental Table 4: SNPs in miRNA target sites based on PITA prediction**

| <b>SNP</b> | <b>SNP Position (hg18)</b> | <b>PITA Prediction</b> |
|------------|----------------------------|------------------------|
| rs1804141  | chr1:66611416              | PDE4B:miR-147          |
| rs3176927  | chr1:66612245              | PDE4B:miR-24           |
| rs16354    | chr1:66612692              | PDE4B:miR-586          |
| rs604737   | chr1:66981676              | SGIP1:miR-181b         |
| rs604737   | chr1:66981676              | SGIP1:miR-181d         |
| rs485521   | chr1:66982150              | SGIP1:miR-302b*        |
| rs56920597 | chr1:67016819              | TCTEX1D1:miR-302b*     |
| rs6681625  | chr1:67224075              | MIER1:miR-501          |
| rs12132068 | chr1:67224512              | MIER1:miR-154*         |
| rs12132068 | chr1:67224512              | MIER1:miR-487a         |
| rs17497828 | chr1:67224910              | MIER1:miR-141          |
| rs17497828 | chr1:67224910              | MIER1:miR-200a         |
| rs17497828 | chr1:67224910              | MIER1:miR-429          |
| rs17497828 | chr1:67224910              | MIER1:miR-514          |
| rs58180044 | chr1:67225311              | MIER1:miR-1            |
| rs58180044 | chr1:67225311              | MIER1:miR-206          |
| rs58180044 | chr1:67225311              | MIER1:miR-580          |
| rs35386444 | chr1:67650980              | SERBP1:miR-144         |
| rs35073663 | chr1:67651013              | SERBP1:miR-380-5p      |
| rs3783479  | chr1:67926072              | GADD45A:miR-659        |
| rs829      | chr1:67926106              | GADD45A:miR-524*       |
| rs829      | chr1:67926106              | GADD45A:miR-527        |
| rs829      | chr1:67926106              | GADD45A:miR-520d*      |
| rs828      | chr1:67926166              | GADD45A:miR-512-5p     |
| rs2621     | chr1:67926323              | GADD45A:miR-655        |
| rs11544221 | chr1:67939944              | GNG12:miR-612          |
| rs1046852  | chr1:68363692              | GPR177:miR-522         |
| rs11558481 | chr1:70490044              | SFRS11:miR-26a         |
| rs11558481 | chr1:70490044              | SFRS11:miR-26b         |
| rs35856741 | chr1:74807777              | C1orf173:miR-659       |
| rs4949795  | chr1:75399744              | LHX8:miR-142-3p        |
| rs60897865 | chr1:78186916              | FUBP1:miR-583          |
| rs1047451  | chr1:78254623              | DNAJB4:miR-186         |
| rs35425451 | chr1:78774911              | PTGFR:miR-424          |
| rs41301196 | chr1:84475113              | PRKACB:miR-578         |
| rs41301200 | chr1:84475415              | PRKACB:miR-557         |
| rs1051529  | chr1:84476538              | PRKACB:miR-491         |
| rs1051529  | chr1:84476538              | PRKACB:miR-553         |
| rs13376116 | chr1:84476685              | PRKACB:miR-199a*       |
| rs13376116 | chr1:84476685              | PRKACB:miR-139         |
| rs2994444  | chr1:84885098              | SSX2IP:miR-655         |
| rs56074135 | chr1:84885209              | SSX2IP:miR-568         |
| rs3196     | chr1:85556903              | DDAH1:miR-154*         |
| rs3196     | chr1:85556903              | DDAH1:miR-487a         |
| rs3196     | chr1:85556903              | DDAH1:miR-586          |
| rs61530529 | chr1:85558327              | DDAH1:miR-122a         |
| rs59853155 | chr1:85891163              | C1orf181:miR-148b      |
| rs59853155 | chr1:85891163              | C1orf181:miR-152       |
| rs7805     | chr1:86981541              | SH3GLB1:miR-381        |
| rs58521196 | chr1:87345928              | HS2ST1:miR-30a-5p      |
| rs58521196 | chr1:87345928              | HS2ST1:miR-30b         |
| rs58521196 | chr1:87345928              | HS2ST1:miR-30c         |

**Supplemental Table 4: SNPs in miRNA target sites based on PITA prediction**

| <b>SNP</b> | <b>SNP Position (hg18)</b> | <b>PITA Prediction</b> |
|------------|----------------------------|------------------------|
| rs58521196 | chr1:87345928              | HS2ST1:miR-30d         |
| rs58521196 | chr1:87345928              | HS2ST1:miR-30e-5p      |
| rs2972003  | chr1:87345930              | HS2ST1:miR-30a-5p      |
| rs2972003  | chr1:87345930              | HS2ST1:miR-30b         |
| rs2972003  | chr1:87345930              | HS2ST1:miR-30c         |
| rs2972003  | chr1:87345930              | HS2ST1:miR-30d         |
| rs2972003  | chr1:87345930              | HS2ST1:miR-30e-5p      |
| rs15436    | chr1:87346408              | HS2ST1:miR-19a         |
| rs15436    | chr1:87346408              | HS2ST1:miR-19b         |
| rs17129815 | chr1:87347428              | HS2ST1:miR-135a        |
| rs17129815 | chr1:87347428              | HS2ST1:miR-135b        |
| rs56112379 | chr1:87583089              | LMO4:miR-630           |
| rs61703221 | chr1:89072197              | PKN2:miR-511           |
| rs786912   | chr1:89073711              | PKN2:miR-372           |
| rs786912   | chr1:89073711              | PKN2:miR-93            |
| rs12068415 | chr1:89220398              | RBMXL1:miR-363*        |
| rs11662    | chr1:90173993              | LRRC8D:miR-522         |
| rs35351831 | chr1:90266335              | ZNF326:miR-302a*       |
| rs1050619  | chr1:91921599              | TGFBR3:miR-23a         |
| rs1050619  | chr1:91921599              | TGFBR3:miR-23b         |
| rs59595404 | chr1:92712962              | GFI1:miR-495           |
| rs12075243 | chr1:92712974              | GFI1:miR-361           |
| rs6603978  | chr1:92751712              | EVI5:miR-493-5p        |
| rs6603978  | chr1:92751712              | EVI5:miR-448           |
| rs6689737  | chr1:92751713              | EVI5:miR-493-5p        |
| rs6689737  | chr1:92751713              | EVI5:miR-448           |
| rs8489     | chr1:93598907              | DR1:miR-384            |
| rs41292649 | chr1:93790619              | FNBP1L:miR-335         |
| rs237429   | chr1:93792116              | FNBP1L:miR-382         |
| rs59784221 | chr1:95135200              | CNN3:miR-618           |
| rs11540277 | chr1:95135466              | CNN3:miR-182           |
| rs3789699  | chr1:95135589              | CNN3:miR-519a          |
| rs3789699  | chr1:95135589              | CNN3:miR-519b          |
| rs3789699  | chr1:95135589              | CNN3:miR-519c          |
| rs1416666  | chr1:97051893              | PTBP2:miR-628          |
| rs56160474 | chr1:97316846              | DPYD:miR-208           |
| rs34734090 | chr1:99128718              | PAP2D:miR-26a          |
| rs34734090 | chr1:99128718              | PAP2D:miR-26b          |
| rs41302764 | chr1:99130603              | PAP2D:miR-1            |
| rs41302764 | chr1:99130603              | PAP2D:miR-206          |
| rs41285716 | chr1:99545479              | LPPR4:miR-571          |
| rs34327534 | chr1:99546976              | LPPR4:miR-491          |
| rs1064302  | chr1:100260994             | SLC35A3:miR-577        |
| rs11539151 | chr1:100261547             | SLC35A3:miR-218        |
| rs5876     | chr1:100320582             | HIAT1:miR-539          |
| rs3783620  | chr1:100977051             | VCAM1:miR-126          |
| rs3194002  | chr1:100977133             | VCAM1:miR-559          |
| rs3194002  | chr1:100977133             | VCAM1:miR-524*         |
| rs61780689 | chr1:101478472             | EDG1:miR-33            |
| rs61780689 | chr1:101478472             | EDG1:miR-148b          |
| rs61780689 | chr1:101478472             | EDG1:miR-152           |
| rs1056840  | chr1:101479198             | EDG1:miR-106a          |

**Supplemental Table 4: SNPs in miRNA target sites based on PITA prediction**

| <b>SNP</b> | <b>SNP Position (hg18)</b> | <b>PITA Prediction</b> |
|------------|----------------------------|------------------------|
| rs1056840  | chr1:101479198             | EDG1:miR-106b          |
| rs1056840  | chr1:101479198             | EDG1:miR-17-5p         |
| rs1056840  | chr1:101479198             | EDG1:miR-20a           |
| rs1056840  | chr1:101479198             | EDG1:miR-20b           |
| rs1056840  | chr1:101479198             | EDG1:miR-519d          |
| rs9659030  | chr1:103114980             | COL11A1:miR-105        |
| rs17127200 | chr1:103115655             | COL11A1:miR-374        |
| rs3088150  | chr1:103115655             | COL11A1:miR-374        |
| rs17127200 | chr1:103115655             | COL11A1:miR-369-3p     |
| rs3088150  | chr1:103115655             | COL11A1:miR-369-3p     |
| rs35089340 | chr1:107825737             | NTNG1:miR-369-3p       |
| rs17019191 | chr1:107825738             | NTNG1:miR-369-3p       |
| rs17019191 | chr1:107825738             | NTNG1:miR-182          |
| rs8676     | chr1:107915388             | VAV3:miR-363           |
| rs17236120 | chr1:107915867             | VAV3:miR-522           |
| rs17236120 | chr1:107915867             | VAV3:miR-140           |
| rs1055977  | chr1:108983292             | FAM102B:miR-191        |
| rs11544312 | chr1:109044243             | PRPF38B:miR-32         |
| rs11544312 | chr1:109044243             | PRPF38B:miR-606        |
| rs658437   | chr1:109619786             | CELSR2:miR-624         |
| rs34208045 | chr1:109851486             | AMIGO1:miR-635         |
| rs7371     | chr1:109936831             | GNAI3:miR-548b         |
| rs7371     | chr1:109936831             | GNAI3:miR-548c         |
| rs3790721  | chr1:111291901             | C1orf103:miR-208       |
| rs61406191 | chr1:111461508             | TMEM77:miR-632         |
| rs1803876  | chr1:112057016             | RAP1A:miR-569          |
| rs3795821  | chr1:112802088             | CTTNBP2NL:miR-581      |
| rs36182732 | chr1:112802471             | CTTNBP2NL:miR-192      |
| rs36182732 | chr1:112802471             | CTTNBP2NL:miR-215      |
| rs36182732 | chr1:112802471             | CTTNBP2NL:miR-193a     |
| rs10605173 | chr1:112802475             | CTTNBP2NL:miR-193a     |
| rs56714545 | chr1:112864937             | WNT2B:miR-130a         |
| rs56714545 | chr1:112864937             | WNT2B:miR-130b         |
| rs56714545 | chr1:112864937             | WNT2B:miR-301          |
| rs56714545 | chr1:112864937             | WNT2B:miR-454-3p       |
| rs36061309 | chr1:112868669             | ST7L:miR-331           |
| rs1802931  | chr1:113015218             | CAPZA1:miR-154         |
| rs35252221 | chr1:113015697             | CAPZA1:miR-363*        |
| rs1059479  | chr1:113045415             | RHOC:miR-106a          |
| rs1059479  | chr1:113045415             | RHOC:miR-106b          |
| rs1059479  | chr1:113045415             | RHOC:miR-17-5p         |
| rs1059479  | chr1:113045415             | RHOC:miR-20a           |
| rs1059479  | chr1:113045415             | RHOC:miR-20b           |
| rs1059479  | chr1:113045415             | RHOC:miR-372           |
| rs1059479  | chr1:113045415             | RHOC:miR-93            |
| rs1059479  | chr1:113045415             | RHOC:miR-138           |
| rs41306207 | chr1:113257704             | SLC16A1:miR-522        |
| rs10108    | chr1:114317853             | HIPK1:miR-7            |
| rs55955354 | chr1:114318935             | HIPK1:miR-576          |
| rs34764866 | chr1:114319284             | HIPK1:miR-524          |
| rs34764866 | chr1:114319284             | HIPK1:miR-525*         |
| rs34764866 | chr1:114319284             | HIPK1:miR-124a         |

**Supplemental Table 4: SNPs in miRNA target sites based on PITA prediction**

| <b>SNP</b> | <b>SNP Position (hg18)</b> | <b>PITA Prediction</b> |
|------------|----------------------------|------------------------|
| rs11558867 | chr1:115061122             | CSDE1:miR-146a         |
| rs11558867 | chr1:115061122             | CSDE1:miR-146b         |
| rs8453     | chr1:115061122             | CSDE1:miR-146a         |
| rs8453     | chr1:115061122             | CSDE1:miR-146b         |
| rs11558867 | chr1:115061122             | CSDE1:miR-320          |
| rs11558867 | chr1:115061122             | CSDE1:miR-548a         |
| rs8453     | chr1:115061122             | CSDE1:miR-320          |
| rs8453     | chr1:115061122             | CSDE1:miR-548a         |
| rs36070559 | chr1:115062104             | CSDE1:miR-645          |
| rs6851     | chr1:115062166             | CSDE1:miR-425-5p       |
| rs41310108 | chr1:116035823             | VANGL1:miR-663         |
| rs1802523  | chr1:116044283             | CASQ2:miR-559          |
| rs1061473  | chr1:116748630             | ATP1A1:miR-609         |
| rs1061473  | chr1:116748630             | ATP1A1:miR-122a        |
| rs3841437  | chr1:117331382             | PTGFRN:miR-186         |
| rs6589     | chr1:117334414             | PTGFRN:miR-659         |
| rs9951     | chr1:117867882             | MAN1A2:miR-151         |
| rs9951     | chr1:117867882             | MAN1A2:miR-645         |
| rs9951     | chr1:117867882             | MAN1A2:miR-505         |
| rs9951     | chr1:117867882             | MAN1A2:miR-634         |
| rs57334390 | chr1:117968261             | FAM46C:miR-518f*       |
| rs57334390 | chr1:117968261             | FAM46C:miR-526a        |
| rs57334390 | chr1:117968261             | FAM46C:miR-526c        |
| rs2066411  | chr1:117968273             | FAM46C:miR-519e        |
| rs2066411  | chr1:117968273             | FAM46C:miR-105         |
| rs851772   | chr1:117968326             | FAM46C:miR-524*        |
| rs55759303 | chr1:117972461             | FAM46C:miR-655         |
| rs1045840  | chr1:119963623             | ZNF697:miR-409-3p      |
| rs1045840  | chr1:119963623             | ZNF697:miR-512-3p      |
| rs57645729 | chr1:119963663             | ZNF697:miR-490         |
| rs1055500  | chr1:143562920             | PDE4DIP:miR-656        |
| rs12080232 | chr1:143827545             | SEC22B:miR-199a        |
| rs12080232 | chr1:143827545             | SEC22B:miR-199b        |
| rs41306213 | chr1:144186912             | ANKRD34:miR-556        |
| rs1050057  | chr1:144297760             | PIAS3:miR-18a          |
| rs1050057  | chr1:144297760             | PIAS3:miR-18b          |
| rs1043806  | chr1:145695923             | GJA5:miR-202           |
| rs3209395  | chr1:148504556             | APH1A:miR-520d*        |
| rs3209394  | chr1:148504557             | APH1A:miR-520d*        |
| rs11548267 | chr1:148505323             | APH1A:miR-376a*        |
| rs11548267 | chr1:148505323             | APH1A:miR-657          |
| rs14654    | chr1:148592176             | PRPF3:miR-154*         |
| rs14654    | chr1:148592176             | PRPF3:miR-487a         |
| rs36123358 | chr1:148813720             | MCL1:miR-221           |
| rs11850    | chr1:148813871             | MCL1:miR-208           |
| rs9436017  | chr1:149204442             | LASS2:miR-204          |
| rs9436017  | chr1:149204442             | LASS2:miR-211          |
| rs35481563 | chr1:149290106             | C1orf56:miR-26a        |
| rs35481563 | chr1:149290106             | C1orf56:miR-26b        |
| rs11554229 | chr1:149306692             | MLLT11:miR-185         |
| rs1802719  | chr1:149306711             | MLLT11:miR-29a         |
| rs1802719  | chr1:149306711             | MLLT11:miR-29b         |

**Supplemental Table 4: SNPs in miRNA target sites based on PITA prediction**

| <b>SNP</b> | <b>SNP Position (hg18)</b> | <b>PITA Prediction</b> |
|------------|----------------------------|------------------------|
| rs1802719  | chr1:149306711             | MLLT11:miR-29c         |
| rs59841079 | chr1:149642196             | POGZ:miR-671           |
| rs3088297  | chr1:149642685             | POGZ:miR-508           |
| rs3088297  | chr1:149642685             | POGZ:miR-186           |
| rs12566457 | chr1:149642691             | POGZ:miR-186           |
| rs61021360 | chr1:149937215             | SNX27:miR-125a         |
| rs61021360 | chr1:149937215             | SNX27:miR-125b         |
| rs61021360 | chr1:149937215             | SNX27:miR-331          |
| rs58950896 | chr1:150012629             | TDRKH:miR-515-5p       |
| rs58950896 | chr1:150012629             | TDRKH:miR-519e*        |
| rs58950896 | chr1:150012629             | TDRKH:miR-522          |
| rs1802640  | chr1:151901177             | ILF2:miR-186           |
| rs16835491 | chr1:151901215             | ILF2:miR-424           |
| rs12742965 | chr1:152044166             | GATAD2B:miR-502        |
| rs12758172 | chr1:152044167             | GATAD2B:miR-502        |
| rs35169408 | chr1:152046093             | GATAD2B:miR-299-3p     |
| rs35169408 | chr1:152046093             | GATAD2B:miR-491        |
| rs9426938  | chr1:152046922             | GATAD2B:miR-635        |
| rs41302143 | chr1:152049076             | GATAD2B:miR-34a        |
| rs41302143 | chr1:152049076             | GATAD2B:miR-34c        |
| rs41302143 | chr1:152049076             | GATAD2B:miR-449        |
| rs41302143 | chr1:152049076             | GATAD2B:miR-449b       |
| rs7704     | chr1:152198303             | SLC39A1:miR-642        |
| rs41310879 | chr1:152198304             | SLC39A1:miR-642        |
| rs41310879 | chr1:152198304             | SLC39A1:miR-515-5p     |
| rs41310879 | chr1:152198304             | SLC39A1:miR-519e*      |
| rs11577138 | chr1:152395624             | TPM3:miR-384           |
| rs1044015  | chr1:152509771             | UBAP2L:miR-765         |
| rs28702634 | chr1:152509815             | UBAP2L:miR-652         |
| rs28702634 | chr1:152509815             | UBAP2L:miR-433         |
| rs11422922 | chr1:152509886             | UBAP2L:miR-144         |
| rs2228147  | chr1:152704465             | IL6R:let-7a            |
| rs2228147  | chr1:152704465             | IL6R:let-7b            |
| rs2228147  | chr1:152704465             | IL6R:let-7c            |
| rs2228147  | chr1:152704465             | IL6R:let-7d            |
| rs2228147  | chr1:152704465             | IL6R:let-7f            |
| rs2228147  | chr1:152704465             | IL6R:let-7g            |
| rs2228147  | chr1:152704465             | IL6R:let-7i            |
| rs2228147  | chr1:152704465             | IL6R:miR-98            |
| rs12904    | chr1:153373321             | EFNA1:miR-193b         |
| rs41264229 | chr1:153573064             | ASH1L:miR-511          |
| rs3738587  | chr1:154118632             | SYT11:miR-545          |
| rs5023514  | chr1:154184036             | ARHGEF2:miR-202*       |
| rs57051663 | chr1:154245645             | SSR2:miR-331           |
| rs57051663 | chr1:154245645             | SSR2:miR-125a          |
| rs57051663 | chr1:154245645             | SSR2:miR-125b          |
| rs708605   | chr1:154375713             | LMNA:miR-581           |
| rs12715    | chr1:154476390             | PMF1:miR-621           |
| rs35769575 | chr1:154700349             | MEF2D:miR-510          |
| rs41267363 | chr1:154700374             | MEF2D:miR-122a         |
| rs11556953 | chr1:158154993             | TAGLN2:miR-659         |
| rs36076633 | chr1:158155137             | TAGLN2:miR-613         |



**Supplemental Table 4: SNPs in miRNA target sites based on PITA prediction**

| <b>SNP</b> | <b>SNP Position (hg18)</b> | <b>PITA Prediction</b> |
|------------|----------------------------|------------------------|
| rs2854245  | chr1:158379963             | ATP1A2:miR-519a        |
| rs2854245  | chr1:158379963             | ATP1A2:miR-519b        |
| rs2854245  | chr1:158379963             | ATP1A2:miR-519c        |
| rs11552712 | chr1:158449962             | PEA15:miR-768-5p       |
| rs1049198  | chr1:158450031             | PEA15:miR-128a         |
| rs1049198  | chr1:158450031             | PEA15:miR-128b         |
| rs16831606 | chr1:158452497             | WDR42A:miR-24          |
| rs16831617 | chr1:158453397             | WDR42A:miR-429         |
| rs5778164  | chr1:158661910             | VANGL2:miR-26a         |
| rs5778164  | chr1:158661910             | VANGL2:miR-26b         |
| rs9282850  | chr1:158846669             | SLAMF1:miR-539         |
| rs3210920  | chr1:159234523             | F11R:miR-378           |
| rs11953    | chr1:159234562             | F11R:miR-508           |
| rs57602466 | chr1:159234617             | F11R:miR-140           |
| rs34364309 | chr1:159336549             | KARCA1:miR-520a*       |
| rs34364309 | chr1:159336549             | KARCA1:miR-525         |
| rs34545109 | chr1:159358074             | DEDD:miR-186           |
| rs36017137 | chr1:159466328             | TOMM40L:miR-382        |
| rs57914150 | chr1:159601165             | C1orf192:miR-561       |
| rs41378649 | chr1:160604285             | NOS1AP:miR-516-3p      |
| rs3738393  | chr1:160621427             | FLJ13137:miR-513       |
| rs41271975 | chr1:160759429             | UHMK1:miR-137          |
| rs11808845 | chr1:160759498             | UHMK1:miR-101          |
| rs11808845 | chr1:160759498             | UHMK1:miR-139          |
| rs9771     | chr1:163082728             | PBX1:miR-765           |
| rs61356515 | chr1:165093267             | TADA1L:miR-135a        |
| rs61356515 | chr1:165093267             | TADA1L:miR-135b        |
| rs6675033  | chr1:165093279             | TADA1L:miR-424         |
| rs6675033  | chr1:165093279             | TADA1L:miR-15a         |
| rs6675033  | chr1:165093279             | TADA1L:miR-15b         |
| rs6675033  | chr1:165093279             | TADA1L:miR-16          |
| rs6675033  | chr1:165093279             | TADA1L:miR-195         |
| rs6675033  | chr1:165093279             | TADA1L:miR-497         |
| rs1054721  | chr1:166437939             | TIPRL:miR-600          |
| rs14824    | chr1:167367438             | ATP1B1:miR-491         |
| rs34447553 | chr1:167367881             | ATP1B1:miR-186         |
| rs1061319  | chr1:167367989             | ATP1B1:miR-559         |
| rs1061321  | chr1:167367995             | ATP1B1:miR-577         |
| rs1061321  | chr1:167367995             | ATP1B1:miR-559         |
| rs12091    | chr1:167368512             | ATP1B1:miR-182         |
| rs1138486  | chr1:167368559             | NME7:miR-570           |
| rs1138486  | chr1:167368559             | ATP1B1:miR-375         |
| rs12091844 | chr1:167699897             | SLC19A2:miR-144        |
| rs6666030  | chr1:168972242             | PRRX1:miR-516-5p       |
| rs10644708 | chr1:168972309             | PRRX1:miR-584          |
| rs58473244 | chr1:168972528             | PRRX1:miR-548b         |
| rs58473244 | chr1:168972528             | PRRX1:miR-548c         |
| rs41310857 | chr1:172022129             | KLHL20:miR-361         |
| rs767053   | chr1:172170360             | RC3H1:miR-154          |
| rs12045577 | chr1:172174259             | RC3H1:miR-452          |
| rs1053045  | chr1:174180638             | RFWD2:miR-186          |
| rs15242    | chr1:174180805             | RFWD2:miR-433          |

**Supplemental Table 4: SNPs in miRNA target sites based on PITA prediction**

| <b>SNP</b> | <b>SNP Position (hg18)</b> | <b>PITA Prediction</b> |
|------------|----------------------------|------------------------|
| rs15242    | chr1:174180805             | RFWD2:miR-135a         |
| rs15242    | chr1:174180805             | RFWD2:miR-135b         |
| rs55771483 | chr1:174180807             | RFWD2:miR-433          |
| rs55771483 | chr1:174180807             | RFWD2:miR-135a         |
| rs55771483 | chr1:174180807             | RFWD2:miR-135b         |
| rs34204158 | chr1:177086612             | ANGPTL1:miR-33         |
| rs11326390 | chr1:177152373             | RALGPS2:miR-34b        |
| rs35017809 | chr1:177152414             | RALGPS2:miR-603        |
| rs1044972  | chr1:177335243             | ABL2:miR-185           |
| rs16856477 | chr1:179120207             | XPR1:miR-548a          |
| rs41268464 | chr1:179326516             | IER5:miR-568           |
| rs41268464 | chr1:179326516             | IER5:miR-429           |
| rs861      | chr1:181123273             | DHX9:miR-30a-5p        |
| rs861      | chr1:181123273             | DHX9:miR-30b           |
| rs861      | chr1:181123273             | DHX9:miR-30c           |
| rs861      | chr1:181123273             | DHX9:miR-30d           |
| rs861      | chr1:181123273             | DHX9:miR-30e-5p        |
| rs860      | chr1:181123363             | DHX9:miR-224           |
| rs3738818  | chr1:181488256             | NMNAT2:miR-657         |
| rs699245   | chr1:181787906             | SMG7:miR-518c*         |
| rs41272542 | chr1:181788123             | SMG7:miR-221           |
| rs41263644 | chr1:181788544             | SMG7:miR-596           |
| rs41263644 | chr1:181788544             | SMG7:miR-193a          |
| rs11549003 | chr1:182308681             | C1orf19:miR-577        |
| rs11549003 | chr1:182308681             | C1orf19:miR-143        |
| rs2378890  | chr1:182857071             | C1orf21:miR-562        |
| rs2378890  | chr1:182857071             | C1orf21:miR-373*       |
| rs2378890  | chr1:182857071             | C1orf21:miR-515-5p     |
| rs2378890  | chr1:182857071             | C1orf21:miR-519e*      |
| rs61703551 | chr1:182927112             | C1orf22:miR-499        |
| rs34348424 | chr1:183337346             | RNF2:miR-429           |
| rs35755428 | chr1:183533492             | IVNS1ABP:miR-589       |
| rs56736495 | chr1:184425750             | HMCN1:miR-29a          |
| rs56736495 | chr1:184425750             | HMCN1:miR-29b          |
| rs56736495 | chr1:184425750             | HMCN1:miR-29c          |
| rs34333849 | chr1:191047947             | RGS2:miR-96            |
| rs3835598  | chr1:191048014             | RGS2:miR-361           |
| rs698859   | chr1:195274988             | F13B:miR-191           |
| rs4639796  | chr1:195393272             | ZBTB41:miR-633         |
| rs4639796  | chr1:195393272             | ZBTB41:miR-101         |
| rs11313660 | chr1:195393671             | ZBTB41:miR-106a        |
| rs11313660 | chr1:195393671             | ZBTB41:miR-106b        |
| rs11313660 | chr1:195393671             | ZBTB41:miR-17-5p       |
| rs11313660 | chr1:195393671             | ZBTB41:miR-20a         |
| rs11313660 | chr1:195393671             | ZBTB41:miR-20b         |
| rs11313660 | chr1:195393671             | ZBTB41:miR-302a        |
| rs11313660 | chr1:195393671             | ZBTB41:miR-302b        |
| rs11313660 | chr1:195393671             | ZBTB41:miR-302c        |
| rs11313660 | chr1:195393671             | ZBTB41:miR-302d        |
| rs11313660 | chr1:195393671             | ZBTB41:miR-373         |
| rs11313660 | chr1:195393671             | ZBTB41:miR-520a        |
| rs11313660 | chr1:195393671             | ZBTB41:miR-520b        |

**Supplemental Table 4: SNPs in miRNA target sites based on PITA prediction**

| <b>SNP</b> | <b>SNP Position (hg18)</b> | <b>PITA Prediction</b> |
|------------|----------------------------|------------------------|
| rs11313660 | chr1:195393671             | ZBTB41:miR-520c        |
| rs11313660 | chr1:195393671             | ZBTB41:miR-520d        |
| rs11313660 | chr1:195393671             | ZBTB41:miR-520e        |
| rs11313660 | chr1:195393671             | ZBTB41:miR-526b*       |
| rs1060061  | chr1:198410065             | NR5A2:miR-432          |
| rs35364522 | chr1:198413117             | NR5A2:miR-186          |
| rs56342851 | chr1:198413118             | NR5A2:miR-186          |
| rs947376   | chr1:199566093             | PKP1:miR-656           |
| rs1054160  | chr1:199719313             | CSRP1:miR-539          |
| rs12082161 | chr1:200056479             | NAV1:miR-586           |
| rs11542634 | chr1:200118729             | IPO9:miR-503           |
| rs11542198 | chr1:200370062             | ARL8A:miR-498          |
| rs11542198 | chr1:200370062             | ARL8A:miR-607          |
| rs11589865 | chr1:200821553             | PPP1R12B:miR-145       |
| rs10494837 | chr1:200963958             | JARID1B:miR-184        |
| rs7539542  | chr1:201176597             | ADIPOR1:miR-511        |
| rs1043268  | chr1:201176889             | ADIPOR1:miR-595        |
| rs10920562 | chr1:201318983             | MYOG:miR-377           |
| rs10920562 | chr1:201318983             | MYOG:miR-768-3p        |
| rs1804734  | chr1:201545229             | BTG2:miR-600           |
| rs35434297 | chr1:201578020             | FMOD:miR-545           |
| rs970      | chr1:201979619             | ATP2B4:miR-493-5p      |
| rs2365983  | chr1:202089557             | ZC3H11A:miR-30a-3p     |
| rs2365983  | chr1:202089557             | ZC3H11A:miR-30e-3p     |
| rs3008593  | chr1:202363424             | SOX13:miR-595          |
| rs36012144 | chr1:202363486             | SOX13:miR-573          |
| rs14575    | chr1:202639308             | PPP1R15B:miR-559       |
| rs14575    | chr1:202639308             | PPP1R15B:miR-577       |
| rs17847775 | chr1:202658472             | PIK3C2B:miR-148a       |
| rs60143169 | chr1:203258517             | NFASC:miR-223          |
| rs12037322 | chr1:203380218             | RIPK5:miR-26a          |
| rs12037322 | chr1:203380218             | RIPK5:miR-26b          |
| rs12040428 | chr1:203380219             | RIPK5:miR-26a          |
| rs12040428 | chr1:203380219             | RIPK5:miR-26b          |
| rs12733647 | chr1:204149424             | SLC26A9:miR-564        |
| rs55894011 | chr1:204972564             | MAPKAPK2:miR-124a      |
| rs41432052 | chr1:205007631             | IL10:miR-380-3p        |
| rs3024522  | chr1:205109186             | IL20:miR-527           |
| rs12091658 | chr1:205320878             | PFKFB2:miR-519a        |
| rs12091658 | chr1:205320878             | PFKFB2:miR-519b        |
| rs12091658 | chr1:205320878             | PFKFB2:miR-519c        |
| rs56021517 | chr1:205600334             | CD55:miR-524*          |
| rs56226104 | chr1:205600335             | CD55:miR-524*          |
| rs56352752 | chr1:205600336             | CD55:miR-524*          |
| rs56040717 | chr1:205600337             | CD55:miR-524*          |
| rs56368043 | chr1:205600338             | CD55:miR-524*          |
| rs56368043 | chr1:205600338             | CD55:miR-656           |
| rs56119363 | chr1:205600339             | CD55:miR-524*          |
| rs56119363 | chr1:205600339             | CD55:miR-656           |
| rs56307978 | chr1:205600340             | CD55:miR-524*          |
| rs56307978 | chr1:205600340             | CD55:miR-656           |
| rs56115912 | chr1:205600341             | CD55:miR-524*          |

**Supplemental Table 4: SNPs in miRNA target sites based on PITA prediction**

| <b>SNP</b> | <b>SNP Position (hg18)</b> | <b>PITA Prediction</b> |
|------------|----------------------------|------------------------|
| rs56115912 | chr1:205600341             | CD55:miR-656           |
| rs55738962 | chr1:205600342             | CD55:miR-524*          |
| rs55738962 | chr1:205600342             | CD55:miR-656           |
| rs55774111 | chr1:205600343             | CD55:miR-656           |
| rs55735213 | chr1:205600344             | CD55:miR-656           |
| rs56336839 | chr1:205600345             | CD55:miR-656           |
| rs55892369 | chr1:205600346             | CD55:miR-656           |
| rs960339   | chr1:208094344             | C1orf107:miR-363       |
| rs2205984  | chr1:208094346             | C1orf107:miR-363       |
| rs11580973 | chr1:208095808             | C1orf107:miR-24        |
| rs11586113 | chr1:208482993             | SERTAD4:miR-577        |
| rs11586113 | chr1:208482993             | SERTAD4:miR-651        |
| rs3855878  | chr1:209555810             | RCOR3:miR-610          |
| rs3483     | chr1:209988119             | LPGAT1:miR-382         |
| rs792429   | chr1:210601673             | PPP2R5A:miR-494        |
| rs792429   | chr1:210601673             | PPP2R5A:miR-641        |
| rs13375798 | chr1:212276065             | PROX1:miR-125a         |
| rs13375798 | chr1:212276065             | PROX1:miR-125b         |
| rs3830398  | chr1:212597708             | PTPN14:miR-559         |
| rs3838998  | chr1:213475521             | KCNK2:miR-382          |
| rs3838998  | chr1:213475521             | KCNK2:miR-186          |
| rs35939502 | chr1:213475522             | KCNK2:miR-382          |
| rs35939502 | chr1:213475522             | KCNK2:miR-186          |
| rs11588647 | chr1:213475956             | KCNK2:miR-200b         |
| rs11588647 | chr1:213475956             | KCNK2:miR-200c         |
| rs11588647 | chr1:213475956             | KCNK2:miR-429          |
| rs11588647 | chr1:213475956             | KCNK2:miR-105          |
| rs11572841 | chr1:214743466             | ESRRG:miR-584          |
| rs11572841 | chr1:214743466             | ESRRG:miR-140          |
| rs1141268  | chr1:214743687             | ESRRG:miR-511          |
| rs4489628  | chr1:214745693             | ESRRG:miR-379          |
| rs12743866 | chr1:214745715             | ESRRG:miR-539          |
| rs1141262  | chr1:214746054             | ESRRG:miR-7            |
| rs36035080 | chr1:218902361             | MARK1:miR-144          |
| rs34140107 | chr1:219941461             | DUSP10:miR-129         |
| rs34140107 | chr1:219941461             | DUSP10:miR-450         |
| rs61824285 | chr1:220905859             | MIA3:miR-450           |
| rs34687623 | chr1:222640811             | WDR26:miR-452          |
| rs6681254  | chr1:223749325             | ENAH:miR-563           |
| rs6681254  | chr1:223749325             | ENAH:miR-514           |
| rs6681254  | chr1:223749325             | ENAH:miR-96            |
| rs2406290  | chr1:223749528             | ENAH:miR-151           |
| rs59605484 | chr1:223749802             | ENAH:miR-223           |
| rs34523945 | chr1:224325836             | H3F3A:miR-580          |
| rs1144840  | chr1:224886456             | ITPKB:miR-183          |
| rs14892    | chr1:226353271             | ARF1:miR-185           |
| rs11313764 | chr1:226431808             | C1orf69:miR-583        |
| rs12035756 | chr1:226431834             | C1orf69:miR-340        |
| rs12035756 | chr1:226431834             | C1orf69:miR-136        |
| rs57766523 | chr1:226432351             | C1orf69:miR-485-3p     |
| rs16851324 | chr1:228482451             | GALNT2:miR-487b        |
| rs7022     | chr1:228484287             | GALNT2:miR-634         |

**Supplemental Table 4: SNPs in miRNA target sites based on PITA prediction**

| <b>SNP</b> | <b>SNP Position (hg18)</b> | <b>PITA Prediction</b> |
|------------|----------------------------|------------------------|
| rs10910416 | chr1:232525976             | SLC35F3:miR-648        |
| rs3045215  | chr1:232807540             | IRF2BP2:miR-520g       |
| rs3045215  | chr1:232807540             | IRF2BP2:miR-520h       |
| rs3045215  | chr1:232807540             | IRF2BP2:miR-106a       |
| rs3045215  | chr1:232807540             | IRF2BP2:miR-106b       |
| rs3045215  | chr1:232807540             | IRF2BP2:miR-17-5p      |
| rs3045215  | chr1:232807540             | IRF2BP2:miR-20a        |
| rs3045215  | chr1:232807540             | IRF2BP2:miR-20b        |
| rs3045215  | chr1:232807540             | IRF2BP2:miR-519d       |
| rs58042860 | chr1:232807541             | IRF2BP2:miR-520g       |
| rs58042860 | chr1:232807541             | IRF2BP2:miR-520h       |
| rs58042860 | chr1:232807541             | IRF2BP2:miR-106a       |
| rs58042860 | chr1:232807541             | IRF2BP2:miR-106b       |
| rs58042860 | chr1:232807541             | IRF2BP2:miR-17-5p      |
| rs58042860 | chr1:232807541             | IRF2BP2:miR-20a        |
| rs58042860 | chr1:232807541             | IRF2BP2:miR-20b        |
| rs58042860 | chr1:232807541             | IRF2BP2:miR-519d       |
| rs58042860 | chr1:232807541             | IRF2BP2:miR-302a       |
| rs58042860 | chr1:232807541             | IRF2BP2:miR-302b       |
| rs58042860 | chr1:232807541             | IRF2BP2:miR-302c       |
| rs58042860 | chr1:232807541             | IRF2BP2:miR-302d       |
| rs58042860 | chr1:232807541             | IRF2BP2:miR-373        |
| rs58042860 | chr1:232807541             | IRF2BP2:miR-519e       |
| rs58042860 | chr1:232807541             | IRF2BP2:miR-520a       |
| rs58042860 | chr1:232807541             | IRF2BP2:miR-520b       |
| rs58042860 | chr1:232807541             | IRF2BP2:miR-520c       |
| rs58042860 | chr1:232807541             | IRF2BP2:miR-520d       |
| rs58042860 | chr1:232807541             | IRF2BP2:miR-520e       |
| rs58042860 | chr1:232807541             | IRF2BP2:miR-526b*      |
| rs59700554 | chr1:232809440             | IRF2BP2:miR-620        |
| rs59700554 | chr1:232809440             | IRF2BP2:miR-202        |
| rs6656006  | chr1:232809442             | IRF2BP2:miR-620        |
| rs6656006  | chr1:232809442             | IRF2BP2:miR-202        |
| rs11195    | chr1:233397053             | ARID4B:miR-603         |
| rs11195    | chr1:233397053             | ARID4B:miR-323         |
| rs7513402  | chr1:234714134             | EDARADD:miR-376a       |
| rs7513402  | chr1:234714134             | EDARADD:miR-376b       |
| rs7513402  | chr1:234714134             | EDARADD:miR-513        |
| rs61736989 | chr1:234714165             | EDARADD:miR-661        |
| rs3916983  | chr1:234714173             | EDARADD:miR-661        |
| rs61737025 | chr1:234714185             | EDARADD:miR-425-5p     |
| rs6428955  | chr1:234714359             | EDARADD:miR-370        |
| rs1062985  | chr1:241355669             | CEP170:miR-202*        |
| rs35197966 | chr1:241733203             | AKT3:miR-452*          |
| rs2275521  | chr1:241733541             | AKT3:miR-765           |
| rs61833175 | chr1:241734127             | AKT3:miR-302c*         |
| rs35885954 | chr1:242638773             | ADSS:miR-656           |
| rs879      | chr1:243083740             | HNRPU:miR-544          |
| rs880      | chr1:243083746             | HNRPU:miR-136          |
| rs61842579 | chr1:244770534             | TFB2M:miR-561          |
| rs4130648  | chr1:244896239             | C1orf71:miR-590        |
| rs6742365  | chr2:1772816               | MYT1L:miR-204          |

**Supplemental Table 4: SNPs in miRNA target sites based on PITA prediction**

| <b>SNP</b> | <b>SNP Position (hg18)</b> | <b>PITA Prediction</b> |
|------------|----------------------------|------------------------|
| rs6742365  | chr2:1772816               | MYT1L:miR-211          |
| rs6742365  | chr2:1772816               | MYT1L:miR-103          |
| rs6742365  | chr2:1772816               | MYT1L:miR-107          |
| rs6756664  | chr2:5752148               | SOX11:miR-384          |
| rs61621262 | chr2:5752281               | SOX11:miR-515-5p       |
| rs61621262 | chr2:5752281               | SOX11:miR-519e*        |
| rs12105008 | chr2:5755791               | SOX11:miR-181a         |
| rs12105008 | chr2:5755791               | SOX11:miR-181c         |
| rs62108849 | chr2:5756132               | SOX11:miR-577          |
| rs10570865 | chr2:5756135               | SOX11:miR-577          |
| rs28718853 | chr2:7101119               | RNF144A:miR-583        |
| rs1050563  | chr2:7101428               | RNF144A:miR-100        |
| rs1050563  | chr2:7101428               | RNF144A:miR-99a        |
| rs1050563  | chr2:7101428               | RNF144A:miR-99b        |
| rs56114166 | chr2:8741755               | ID2:miR-576            |
| rs13401658 | chr2:8741821               | ID2:miR-519a           |
| rs13401658 | chr2:8741821               | ID2:miR-519b           |
| rs13401658 | chr2:8741821               | ID2:miR-519c           |
| rs56306470 | chr2:9463693               | ITGB1BP1:miR-489       |
| rs11246    | chr2:10059753              | GRHL1:miR-524*         |
| rs1042950  | chr2:10484429              | HPCAL1:miR-581         |
| rs28362417 | chr2:10498265              | ODC1:miR-610           |
| rs1804105  | chr2:10841528              | PDIA6:miR-132          |
| rs1804105  | chr2:10841528              | PDIA6:miR-212          |
| rs11545888 | chr2:10842575              | ATP6V1C2:miR-566       |
| rs34445213 | chr2:12800115              | TRIB2:miR-409-3p       |
| rs3835944  | chr2:12800274              | TRIB2:miR-651          |
| rs12105871 | chr2:15688566              | DDX1:miR-200b          |
| rs12105871 | chr2:15688566              | DDX1:miR-200c          |
| rs12105871 | chr2:15688566              | DDX1:miR-429           |
| rs13404748 | chr2:16597634              | FAM49A:miR-30a-5p      |
| rs13404748 | chr2:16597634              | FAM49A:miR-30b         |
| rs13404748 | chr2:16597634              | FAM49A:miR-30c         |
| rs13404748 | chr2:16597634              | FAM49A:miR-30d         |
| rs13404748 | chr2:16597634              | FAM49A:miR-30e-5p      |
| rs14762    | chr2:20095977              | LAPTM4A:miR-587        |
| rs11539765 | chr2:20314674              | PUM2:miR-548b          |
| rs2303301  | chr2:23825288              | ATAD2B:miR-561         |
| rs34816646 | chr2:24139936              | FKBP1B:miR-204         |
| rs34816646 | chr2:24139936              | FKBP1B:miR-211         |
| rs1802877  | chr2:24844861              | NCOA1:miR-604          |
| rs1802877  | chr2:24844861              | NCOA1:miR-647          |
| rs17737058 | chr2:24845073              | NCOA1:miR-488          |
| rs4194     | chr2:24895704              | ADCY3:miR-493-3p       |
| rs35163679 | chr2:25309938              | DNMT3A:miR-429         |
| rs36090614 | chr2:26003103              | KIF3C:miR-184          |
| rs6705     | chr2:26211614              | RAB10:miR-600          |
| rs6705     | chr2:26211614              | RAB10:miR-556          |
| rs35339463 | chr2:26211654              | RAB10:miR-203          |
| rs62128674 | chr2:26465969              | SELL:miR-182           |
| rs35774110 | chr2:27023560              | DPYSL5:miR-520g        |
| rs35774110 | chr2:27023560              | DPYSL5:miR-520h        |

**Supplemental Table 4: SNPs in miRNA target sites based on PITA prediction**

| <b>SNP</b> | <b>SNP Position (hg18)</b> | <b>PITA Prediction</b> |
|------------|----------------------------|------------------------|
| rs3177274  | chr2:27118051              | FLJ20254:miR-511       |
| rs9974     | chr2:27568475              | FNDC4:miR-31           |
| rs11687800 | chr2:28876463              | PPP1CB:miR-656         |
| rs11687800 | chr2:28876463              | PPP1CB:miR-429         |
| rs11687800 | chr2:28876463              | PPP1CB:miR-155         |
| rs11540534 | chr2:28877080              | PPP1CB:miR-181a        |
| rs11540534 | chr2:28877080              | PPP1CB:miR-181c        |
| rs11680458 | chr2:29024127              | WDR43:miR-141          |
| rs11680458 | chr2:29024127              | WDR43:miR-200a         |
| rs11680458 | chr2:29024127              | WDR43:miR-200b         |
| rs11680458 | chr2:29024127              | WDR43:miR-200c         |
| rs1131881  | chr2:29024217              | WDR43:miR-527          |
| rs59633688 | chr2:29140013              | FLJ34931:miR-511       |
| rs36058697 | chr2:29259596              | RSNL2:miR-559          |
| rs36058697 | chr2:29259596              | RSNL2:miR-142-5p       |
| rs4951983  | chr2:30235405              | YPEL5:miR-603          |
| rs3087895  | chr2:30235457              | YPEL5:miR-30a-5p       |
| rs3087895  | chr2:30235457              | YPEL5:miR-30b          |
| rs3087895  | chr2:30235457              | YPEL5:miR-30c          |
| rs3087895  | chr2:30235457              | YPEL5:miR-30d          |
| rs3087895  | chr2:30235457              | YPEL5:miR-30e-5p       |
| rs1060243  | chr2:30235812              | YPEL5:miR-542-3p       |
| rs11348357 | chr2:30336333              | LBH:miR-106a           |
| rs11348357 | chr2:30336333              | LBH:miR-106b           |
| rs11348357 | chr2:30336333              | LBH:miR-17-5p          |
| rs11348357 | chr2:30336333              | LBH:miR-20a            |
| rs11348357 | chr2:30336333              | LBH:miR-20b            |
| rs57797549 | chr2:30720545              | LYCAT:miR-369-3p       |
| rs62142066 | chr2:31946604              | C2orf4:miR-527         |
| rs35697513 | chr2:31946624              | C2orf4:miR-651         |
| rs1043463  | chr2:32696799              | BIRC6:miR-559          |
| rs1043463  | chr2:32696799              | BIRC6:miR-142-5p       |
| rs1043463  | chr2:32696799              | BIRC6:miR-577          |
| rs1043463  | chr2:32696799              | BIRC6:miR-559          |
| rs41291169 | chr2:33477177              | LTBP1:miR-655          |
| rs41291169 | chr2:33477177              | LTBP1:miR-369-3p       |
| rs59712446 | chr2:33641597              | RASGRP3:miR-522        |
| rs11066    | chr2:33662798              | FAM98A:miR-527         |
| rs11066    | chr2:33662798              | FAM98A:miR-28          |
| rs7596614  | chr2:33662975              | FAM98A:miR-561         |
| rs7596614  | chr2:33662975              | FAM98A:miR-601         |
| rs11552401 | chr2:33663329              | FAM98A:miR-31          |
| rs11124323 | chr2:33663330              | FAM98A:miR-31          |
| rs11550290 | chr2:36630373              | CRIM1:miR-421          |
| rs11550290 | chr2:36630373              | CRIM1:miR-545          |
| rs10707574 | chr2:36630882              | CRIM1:miR-548c         |
| rs63410563 | chr2:36630882              | CRIM1:miR-548c         |
| rs58368969 | chr2:36630914              | CRIM1:miR-498          |
| rs58368969 | chr2:36630914              | CRIM1:miR-607          |
| rs1801605  | chr2:36631540              | CRIM1:miR-507          |
| rs1801605  | chr2:36631540              | CRIM1:miR-561          |
| rs1801605  | chr2:36631540              | CRIM1:miR-186          |

**Supplemental Table 4: SNPs in miRNA target sites based on PITA prediction**

| <b>SNP</b> | <b>SNP Position (hg18)</b> | <b>PITA Prediction</b> |
|------------|----------------------------|------------------------|
| rs13423357 | chr2:36929888              | STRN:miR-484           |
| rs62132520 | chr2:36930002              | STRN:miR-589           |
| rs5830462  | chr2:37333504              | PRKD3:miR-568          |
| rs58356461 | chr2:37333510              | PRKD3:miR-568          |
| rs58356461 | chr2:37333510              | PRKD3:miR-583          |
| rs61717700 | chr2:38376881              | ARL6IP2:miR-577        |
| rs3134638  | chr2:38825605              | SFRS7:miR-655          |
| rs36085299 | chr2:39330806              | MAP4K3:miR-199a*       |
| rs36085299 | chr2:39330806              | MAP4K3:miR-142-3p      |
| rs3770679  | chr2:39331106              | MAP4K3:miR-653         |
| rs2424     | chr2:42139079              | LOC91461:miR-524*      |
| rs56873751 | chr2:42431309              | COX7A2L:miR-32         |
| rs1997     | chr2:42431310              | COX7A2L:miR-32         |
| rs3209872  | chr2:43304748              | ZFP36L2:miR-559        |
| rs3209872  | chr2:43304748              | ZFP36L2:miR-577        |
| rs3213850  | chr2:43848505              | PLEKHH2:miR-432*       |
| rs34291782 | chr2:44313545              | PPM1B:miR-768-5p       |
| rs4953322  | chr2:46265737              | PRKCE:miR-33b          |
| rs1804166  | chr2:46662070              | RHOQ:miR-612           |
| rs17035318 | chr2:46662550              | RHOQ:miR-610           |
| rs34098574 | chr2:46664267              | RHOQ:miR-9             |
| rs41332745 | chr2:46843035              | SOCS5:miR-302a         |
| rs41332745 | chr2:46843035              | SOCS5:miR-302b         |
| rs41332745 | chr2:46843035              | SOCS5:miR-302c         |
| rs41332745 | chr2:46843035              | SOCS5:miR-302d         |
| rs41332745 | chr2:46843035              | SOCS5:miR-373          |
| rs41332745 | chr2:46843035              | SOCS5:miR-520a         |
| rs41332745 | chr2:46843035              | SOCS5:miR-520b         |
| rs41332745 | chr2:46843035              | SOCS5:miR-520c         |
| rs41332745 | chr2:46843035              | SOCS5:miR-520d         |
| rs41332745 | chr2:46843035              | SOCS5:miR-520e         |
| rs41332745 | chr2:46843035              | SOCS5:miR-526b*        |
| rs41467849 | chr2:46843181              | SOCS5:miR-493-5p       |
| rs1803207  | chr2:47241004              | CALM2:miR-450          |
| rs1803209  | chr2:47241073              | CALM2:miR-302b*        |
| rs1803206  | chr2:47241137              | CALM2:miR-205          |
| rs11551441 | chr2:47241305              | CALM2:miR-493-5p       |
| rs55886808 | chr2:47887850              | FBXO11:miR-151         |
| rs3839058  | chr2:50001615              | NRXN1:miR-559          |
| rs3839058  | chr2:50001615              | NRXN1:miR-577          |
| rs2542581  | chr2:53855568              | CHAC2:miR-591          |
| rs2971879  | chr2:54742037              | SPTBN1:miR-368         |
| rs2971879  | chr2:54742037              | SPTBN1:miR-376a        |
| rs2971879  | chr2:54742037              | SPTBN1:miR-376b        |
| rs2971877  | chr2:54742640              | SPTBN1:miR-627         |
| rs10528    | chr2:54742653              | SPTBN1:miR-155         |
| rs60696017 | chr2:54749893              | SPTBN1:miR-545         |
| rs35520933 | chr2:54750088              | SPTBN1:miR-143         |
| rs2971876  | chr2:54750123              | SPTBN1:miR-542-3p      |
| rs7573286  | chr2:55053268              | RTN4:miR-182           |
| rs58867028 | chr2:55370215              | KIAA1212:miR-522       |
| rs17046829 | chr2:55370723              | KIAA1212:miR-186       |



**Supplemental Table 4: SNPs in miRNA target sites based on PITA prediction**

| <b>SNP</b> | <b>SNP Position (hg18)</b> | <b>PITA Prediction</b> |
|------------|----------------------------|------------------------|
| rs17347807 | chr2:55370791              | KIAA1212:miR-519a      |
| rs17347807 | chr2:55370791              | KIAA1212:miR-519b      |
| rs17347807 | chr2:55370791              | KIAA1212:miR-519c      |
| rs8080     | chr2:55629228              | SMEK2:miR-515-5p       |
| rs8080     | chr2:55629228              | SMEK2:miR-519e*        |
| rs2287086  | chr2:60539999              | BCL11A:miR-557         |
| rs2287086  | chr2:60539999              | BCL11A:miR-323         |
| rs2287086  | chr2:60539999              | BCL11A:miR-32          |
| rs12623650 | chr2:60540683              | BCL11A:miR-626         |
| rs35238724 | chr2:60540821              | BCL11A:miR-583         |
| rs3841388  | chr2:61268400              | USP34:miR-656          |
| rs3841388  | chr2:61268400              | USP34:miR-154*         |
| rs3841388  | chr2:61268400              | USP34:miR-487a         |
| rs3841388  | chr2:61268400              | USP34:miR-487b         |
| rs1050608  | chr2:61558609              | XPO1:miR-142-3p        |
| rs1050567  | chr2:61559167              | XPO1:miR-607           |
| rs12613621 | chr2:63137026              | OTX1:miR-503           |
| rs34904144 | chr2:63971980              | UGP2:miR-505           |
| rs34801175 | chr2:63973923              | VPS54:miR-505          |
| rs35313784 | chr2:64539900              | HSPC159:miR-628        |
| rs35720078 | chr2:64712291              | SERTAD2:miR-520d*      |
| rs1803493  | chr2:64712300              | SERTAD2:miR-524*       |
| rs61758846 | chr2:65167262              | CEP68:miR-128a         |
| rs61758846 | chr2:65167262              | CEP68:miR-128b         |
| rs11546467 | chr2:65167624              | RAB1A:miR-559          |
| rs11546467 | chr2:65167624              | RAB1A:miR-577          |
| rs11548391 | chr2:65391799              | SPRED2:miR-559         |
| rs11548391 | chr2:65391799              | SPRED2:miR-577         |
| rs35261794 | chr2:69554435              | AAK1:miR-205           |
| rs1048139  | chr2:69985295              | RY1:miR-200b           |
| rs1048139  | chr2:69985295              | RY1:miR-200c           |
| rs1048139  | chr2:69985295              | RY1:miR-429            |
| rs13402589 | chr2:70169549              | PCBP1:miR-600          |
| rs11545481 | chr2:70169611              | PCBP1:miR-646          |
| rs3732260  | chr2:70230959              | FLJ20558:miR-19a       |
| rs3732260  | chr2:70230959              | FLJ20558:miR-19b       |
| rs61296228 | chr2:70528078              | TGFA:miR-23a           |
| rs61296228 | chr2:70528078              | TGFA:miR-23b           |
| rs61296228 | chr2:70528078              | TGFA:miR-655           |
| rs753554   | chr2:73014955              | EMX1:miR-587           |
| rs1046157  | chr2:73154050              | RAB11FIP5:miR-106a     |
| rs1046157  | chr2:73154050              | RAB11FIP5:miR-106b     |
| rs1046157  | chr2:73154050              | RAB11FIP5:miR-17-5p    |
| rs1046157  | chr2:73154050              | RAB11FIP5:miR-20a      |
| rs1046157  | chr2:73154050              | RAB11FIP5:miR-20b      |
| rs1046157  | chr2:73154050              | RAB11FIP5:miR-302a     |
| rs1046157  | chr2:73154050              | RAB11FIP5:miR-302b     |
| rs1046157  | chr2:73154050              | RAB11FIP5:miR-302c     |
| rs1046157  | chr2:73154050              | RAB11FIP5:miR-302d     |
| rs1046157  | chr2:73154050              | RAB11FIP5:miR-373      |
| rs1046157  | chr2:73154050              | RAB11FIP5:miR-520a     |
| rs1046157  | chr2:73154050              | RAB11FIP5:miR-520b     |

**Supplemental Table 4: SNPs in miRNA target sites based on PITA prediction**

| <b>SNP</b> | <b>SNP Position (hg18)</b> | <b>PITA Prediction</b> |
|------------|----------------------------|------------------------|
| rs1046157  | chr2:73154050              | RAB11FIP5:miR-520c     |
| rs1046157  | chr2:73154050              | RAB11FIP5:miR-520d     |
| rs1046157  | chr2:73154050              | RAB11FIP5:miR-520e     |
| rs1046157  | chr2:73154050              | RAB11FIP5:miR-526b*    |
| rs59113407 | chr2:73338218              | FBXO41:miR-125a        |
| rs59113407 | chr2:73338218              | FBXO41:miR-125b        |
| rs60199157 | chr2:74185048              | MGC22014:miR-548a      |
| rs60199157 | chr2:74185048              | MGC22014:miR-9*        |
| rs3177776  | chr2:74441800              | DCTN1:miR-382          |
| rs2215872  | chr2:75572994              | FLJ13391:miR-9         |
| rs11555661 | chr2:80728802              | CTNNA2:miR-642         |
| rs11541447 | chr2:85398799              | TGOLN2:miR-559         |
| rs11541447 | chr2:85398799              | TGOLN2:miR-577         |
| rs744716   | chr2:85688725              | LOC388969:miR-612      |
| rs60499102 | chr2:85689360              | LOC388969:miR-186      |
| rs5832651  | chr2:85689363              | LOC388969:miR-186      |
| rs734042   | chr2:85868607              | ATOH8:miR-654          |
| rs3731812  | chr2:86586087              | VPS24:miR-559          |
| rs11555305 | chr2:88637521              | EIF2AK3:miR-559        |
| rs11555305 | chr2:88637521              | EIF2AK3:miR-577        |
| rs57072789 | chr2:96172725              | DUSP2:miR-513          |
| rs7585552  | chr2:96840971              | CNNM4:miR-328          |
| rs1054042  | chr2:98980828              | TSGA10:miR-191         |
| rs28382980 | chr2:99383784              | REV1L:miR-199a*        |
| rs3739008  | chr2:100979000             | NPAS2:miR-302a         |
| rs3739008  | chr2:100979000             | NPAS2:miR-302b         |
| rs3739008  | chr2:100979000             | NPAS2:miR-302c         |
| rs3739008  | chr2:100979000             | NPAS2:miR-302d         |
| rs3739008  | chr2:100979000             | NPAS2:miR-373          |
| rs3739008  | chr2:100979000             | NPAS2:miR-519e         |
| rs3739008  | chr2:100979000             | NPAS2:miR-520a         |
| rs3739008  | chr2:100979000             | NPAS2:miR-520b         |
| rs3739008  | chr2:100979000             | NPAS2:miR-520c         |
| rs3739008  | chr2:100979000             | NPAS2:miR-520d         |
| rs3739008  | chr2:100979000             | NPAS2:miR-520e         |
| rs3739008  | chr2:100979000             | NPAS2:miR-526b*        |
| rs3739008  | chr2:100979000             | NPAS2:miR-106a         |
| rs3739008  | chr2:100979000             | NPAS2:miR-106b         |
| rs3739008  | chr2:100979000             | NPAS2:miR-17-5p        |
| rs3739008  | chr2:100979000             | NPAS2:miR-20a          |
| rs3739008  | chr2:100979000             | NPAS2:miR-20b          |
| rs3739008  | chr2:100979000             | NPAS2:miR-519d         |
| rs1057591  | chr2:100990177             | TBC1D8:miR-584         |
| rs11550128 | chr2:100990177             | TBC1D8:miR-584         |
| rs12622613 | chr2:101875518             | MAP4K4:miR-522         |
| rs61317215 | chr2:102799712             | FLJ30294:miR-106a      |
| rs61317215 | chr2:102799712             | FLJ30294:miR-106b      |
| rs61317215 | chr2:102799712             | FLJ30294:miR-17-5p     |
| rs61317215 | chr2:102799712             | FLJ30294:miR-20a       |
| rs61317215 | chr2:102799712             | FLJ30294:miR-20b       |
| rs61317215 | chr2:102799712             | FLJ30294:miR-520g      |
| rs61317215 | chr2:102799712             | FLJ30294:miR-520h      |

**Supplemental Table 4: SNPs in miRNA target sites based on PITA prediction**

| <b>SNP</b> | <b>SNP Position (hg18)</b> | <b>PITA Prediction</b> |
|------------|----------------------------|------------------------|
| rs6752950  | chr2:102799724             | FLJ30294:miR-136       |
| rs12991992 | chr2:105328286             | MGC5509:miR-144        |
| rs15139    | chr2:105877007             | NCK2:miR-130a          |
| rs15139    | chr2:105877007             | NCK2:miR-130b          |
| rs15139    | chr2:105877007             | NCK2:miR-301           |
| rs15139    | chr2:105877007             | NCK2:miR-454-3p        |
| rs11553853 | chr2:105877068             | NCK2:miR-340           |
| rs11553853 | chr2:105877068             | NCK2:miR-122a          |
| rs1801602  | chr2:106076797             | UXS1:miR-145           |
| rs10164715 | chr2:108767616             | RANBP2:miR-568         |
| rs10164715 | chr2:108767616             | RANBP2:miR-643         |
| rs6594049  | chr2:109732314             | C2orf26:miR-196a       |
| rs6594049  | chr2:109732314             | C2orf26:miR-196b       |
| rs34871350 | chr2:113137493             | SLC20A1:miR-210        |
| rs11552051 | chr2:113137793             | SLC20A1:miR-561        |
| rs1479     | chr2:113691575             | PAX8:miR-579           |
| rs1479     | chr2:113691575             | PAX8:miR-144           |
| rs1049137  | chr2:113691581             | PAX8:miR-144           |
| rs55877945 | chr2:114432133             | ACTR3:miR-383          |
| rs10171969 | chr2:116316517             | DPP10:miR-326          |
| rs6758051  | chr2:119630571             | C1QL2:miR-145          |
| rs2923     | chr2:128180088             | WDR33:miR-187          |
| rs1550175  | chr2:128338371             | MGC4268:miR-136        |
| rs6704678  | chr2:131835157             | LOC150786:miR-139      |
| rs6704678  | chr2:131835157             | LOC150786:miR-27a      |
| rs6704678  | chr2:131835157             | LOC150786:miR-27b      |
| rs6704678  | chr2:131835157             | LOC150786:miR-128a     |
| rs6704678  | chr2:131835157             | LOC150786:miR-128b     |
| rs11896922 | chr2:135430018             | CCNT2:miR-19a          |
| rs11896922 | chr2:135430018             | CCNT2:miR-19b          |
| rs17848060 | chr2:136588479             | CXCR4:miR-548d         |
| rs5012365  | chr2:138151133             | THSD7B:miR-145         |
| rs35475588 | chr2:138151592             | THSD7B:miR-568         |
| rs1053679  | chr2:139043384             | LOC339745:miR-124a     |
| rs61206995 | chr2:139046987             | LOC339745:miR-144      |
| rs35521195 | chr2:140705515             | LRP1B:miR-142-5p       |
| rs13035458 | chr2:140706821             | LRP1B:miR-183          |
| rs62169203 | chr2:144862630             | ZFHX1B:miR-32          |
| rs62169203 | chr2:144862630             | ZFHX1B:miR-363         |
| rs61461890 | chr2:144863024             | ZFHX1B:miR-374         |
| rs59216363 | chr2:148404634             | ACVR2A:miR-630         |
| rs16828708 | chr2:148987180             | MBD5:miR-9             |
| rs34263068 | chr2:149261323             | EPC2:miR-614           |
| rs11291336 | chr2:152403264             | CACNB4:miR-96          |
| rs1437678  | chr2:153220032             | PRPF40A:miR-573        |
| rs12803    | chr2:156890171             | NR4A2:miR-656          |
| rs6750643  | chr2:157148405             | GPD2:miR-143           |
| rs1053406  | chr2:157150734             | GPD2:miR-452*          |
| rs34680206 | chr2:157150964             | GPD2:miR-199a*         |
| rs34680206 | chr2:157150964             | GPD2:miR-302b*         |
| rs2074954  | chr2:158699771             | UPP2:miR-376a          |
| rs2074954  | chr2:158699771             | UPP2:miR-376b          |

**Supplemental Table 4: SNPs in miRNA target sites based on PITA prediction**

| <b>SNP</b> | <b>SNP Position (hg18)</b> | <b>PITA Prediction</b> |
|------------|----------------------------|------------------------|
| rs10016    | chr2:159380688             | LOC92196:miR-558       |
| rs5835767  | chr2:160368385             | LY75:miR-559           |
| rs5835767  | chr2:160368385             | LY75:miR-142-5p        |
| rs34160335 | chr2:160368386             | LY75:miR-559           |
| rs34160335 | chr2:160368386             | LY75:miR-142-5p        |
| rs3035626  | chr2:160368387             | LY75:miR-559           |
| rs3035626  | chr2:160368387             | LY75:miR-142-5p        |
| rs13431973 | chr2:161800805             | TANK:miR-1             |
| rs13431973 | chr2:161800805             | TANK:miR-206           |
| rs1065062  | chr2:161989477             | TBR1:miR-454-5p        |
| rs11552332 | chr2:162707674             | GCG:miR-586            |
| rs11552335 | chr2:162707990             | GCG:miR-561            |
| rs35762655 | chr2:162936228             | KCNH7:miR-147          |
| rs1051160  | chr2:165057705             | GRB14:miR-496          |
| rs35211333 | chr2:165654287             | SCN3A:miR-495          |
| rs35211333 | chr2:165654287             | SCN3A:miR-410          |
| rs5024424  | chr2:165956317             | SCN2A2:miR-101         |
| rs7425806  | chr2:168519203             | STK39:miR-630          |
| rs7355470  | chr2:169334610             | LASS6:miR-524*         |
| rs7355470  | chr2:169334610             | LASS6:miR-520d*        |
| rs2232327  | chr2:169472786             | G6PC2:miR-491          |
| rs11554658 | chr2:169472800             | G6PC2:miR-302c*        |
| rs62171309 | chr2:170071262             | BBS5:miR-548a          |
| rs1051387  | chr2:170376601             | SSB:miR-422a           |
| rs35294426 | chr2:170647134             | ZNF650:miR-186         |
| rs34365430 | chr2:171425541             | GAD1:miR-302a          |
| rs34365430 | chr2:171425541             | GAD1:miR-302b          |
| rs34365430 | chr2:171425541             | GAD1:miR-302c          |
| rs34365430 | chr2:171425541             | GAD1:miR-302d          |
| rs34365430 | chr2:171425541             | GAD1:miR-373           |
| rs34365430 | chr2:171425541             | GAD1:miR-520a          |
| rs34365430 | chr2:171425541             | GAD1:miR-520b          |
| rs34365430 | chr2:171425541             | GAD1:miR-520c          |
| rs34365430 | chr2:171425541             | GAD1:miR-520d          |
| rs34365430 | chr2:171425541             | GAD1:miR-520e          |
| rs34365430 | chr2:171425541             | GAD1:miR-526b*         |
| rs34365430 | chr2:171425541             | GAD1:miR-106a          |
| rs34365430 | chr2:171425541             | GAD1:miR-106b          |
| rs34365430 | chr2:171425541             | GAD1:miR-17-5p         |
| rs34365430 | chr2:171425541             | GAD1:miR-20a           |
| rs34365430 | chr2:171425541             | GAD1:miR-20b           |
| rs61436544 | chr2:171557846             | TLK1:miR-590           |
| rs1803497  | chr2:171558181             | TLK1:miR-802           |
| rs1803497  | chr2:171558181             | TLK1:miR-194           |
| rs10205459 | chr2:171889017             | METTL8:miR-148b        |
| rs10205459 | chr2:171889017             | METTL8:miR-152         |
| rs3770417  | chr2:172121835             | CYBRD1:miR-23a         |
| rs3770417  | chr2:172121835             | CYBRD1:miR-23b         |
| rs1047109  | chr2:172122799             | CYBRD1:miR-651         |
| rs35952194 | chr2:172312781             | DYNC112:miR-502        |
| rs10930504 | chr2:172672884             | DLX2:miR-802           |
| rs10930504 | chr2:172672884             | DLX2:miR-577           |

**Supplemental Table 4: SNPs in miRNA target sites based on PITA prediction**

| <b>SNP</b> | <b>SNP Position (hg18)</b> | <b>PITA Prediction</b> |
|------------|----------------------------|------------------------|
| rs35272219 | chr2:173625469             | RAPGEF4:miR-613        |
| rs35272219 | chr2:173625469             | RAPGEF4:miR-203        |
| rs16861249 | chr2:173625541             | RAPGEF4:miR-633        |
| rs59140602 | chr2:173799413             | ZAK:miR-424            |
| rs16861385 | chr2:173800069             | ZAK:miR-559            |
| rs13390303 | chr2:174648015             | PTD004:miR-516-5p      |
| rs13383797 | chr2:175005289             | GPR155:miR-579         |
| rs3087907  | chr2:175133025             | WIPF1:miR-409-3p       |
| rs1062650  | chr2:175751147             | ATP5G3:miR-135a        |
| rs1062650  | chr2:175751147             | ATP5G3:miR-135b        |
| rs1062650  | chr2:175751147             | ATP5G3:miR-620         |
| rs1062649  | chr2:175751165             | ATP5G3:miR-202*        |
| rs1062648  | chr2:175751177             | ATP5G3:miR-200b        |
| rs1062648  | chr2:175751177             | ATP5G3:miR-200c        |
| rs1062646  | chr2:175751201             | ATP5G3:miR-27a         |
| rs1062646  | chr2:175751201             | ATP5G3:miR-27b         |
| rs1062646  | chr2:175751201             | ATP5G3:miR-128a        |
| rs1062646  | chr2:175751201             | ATP5G3:miR-128b        |
| rs6725515  | chr2:176763339             | HOXD1:miR-641          |
| rs6725515  | chr2:176763339             | HOXD1:miR-124a         |
| rs35094300 | chr2:176910788             | MTX2:miR-144           |
| rs8470     | chr2:177794073             | HNRPA3:miR-147         |
| rs11543307 | chr2:177803399             | NFE2L2:miR-519a        |
| rs11543307 | chr2:177803399             | NFE2L2:miR-519b        |
| rs11543307 | chr2:177803399             | NFE2L2:miR-519c        |
| rs1057092  | chr2:177803408             | NFE2L2:miR-153         |
| rs28434417 | chr2:178111321             | AGPS:miR-589           |
| rs59805954 | chr2:178187895             | TTC30A:miR-18a         |
| rs59805954 | chr2:178187895             | TTC30A:miR-18b         |
| rs59805954 | chr2:178187895             | TTC30A:miR-519a        |
| rs59805954 | chr2:178187895             | TTC30A:miR-519b        |
| rs59805954 | chr2:178187895             | TTC30A:miR-519c        |
| rs930192   | chr2:178702434             | DRB1:miR-513           |
| rs2304340  | chr2:178968628             | OSBPL6:miR-640         |
| rs2304340  | chr2:178968628             | OSBPL6:miR-380-5p      |
| rs13406973 | chr2:178969089             | OSBPL6:miR-526b        |
| rs3997878  | chr2:179004872             | PRKRA:miR-144          |
| rs34552415 | chr2:179681864             | SESTD1:miR-539         |
| rs35601211 | chr2:180015486             | ZNF533:miR-579         |
| rs1372123  | chr2:182250445             | NEUROD1:miR-140        |
| rs4666601  | chr2:183498317             | NCKAP1:miR-429         |
| rs4666601  | chr2:183498317             | NCKAP1:miR-656         |
| rs16827948 | chr2:187081968             | ZC3H15:miR-363*        |
| rs34417253 | chr2:189584946             | COL3A1:miR-653         |
| rs35208035 | chr2:189584959             | COL3A1:miR-509         |
| rs1140642  | chr2:189605556             | COL5A2:miR-511         |
| rs1140641  | chr2:189605558             | COL5A2:miR-511         |
| rs11539983 | chr2:190133719             | SLC40A1:miR-519a       |
| rs11539983 | chr2:190133719             | SLC40A1:miR-519b       |
| rs11539983 | chr2:190133719             | SLC40A1:miR-519c       |
| rs1055091  | chr2:190343388             | ORMDL1:miR-154*        |
| rs1055091  | chr2:190343388             | ORMDL1:miR-487a        |

**Supplemental Table 4: SNPs in miRNA target sites based on PITA prediction**

| <b>SNP</b> | <b>SNP Position (hg18)</b> | <b>PITA Prediction</b> |
|------------|----------------------------|------------------------|
| rs1055091  | chr2:190343388             | ORMDL1:miR-487b        |
| rs6942     | chr2:190344656             | ORMDL1:miR-126*        |
| rs1053180  | chr2:191263688             | NAB1:miR-559           |
| rs41481847 | chr2:191543520             | STAT1:miR-539          |
| rs13391047 | chr2:196308394             | SLC39A10:miR-515-5p    |
| rs13391047 | chr2:196308394             | SLC39A10:miR-519e*     |
| rs56316129 | chr2:196308707             | SLC39A10:miR-524*      |
| rs56316129 | chr2:196308707             | SLC39A10:miR-381       |
| rs56316129 | chr2:196308707             | SLC39A10:miR-369-3p    |
| rs55865691 | chr2:196309987             | SLC39A10:miR-567       |
| rs34655865 | chr2:196309999             | SLC39A10:miR-320       |
| rs34655865 | chr2:196309999             | SLC39A10:miR-548a      |
| rs34250178 | chr2:196310334             | SLC39A10:miR-509       |
| rs3049428  | chr2:196310458             | SLC39A10:miR-224       |
| rs35013923 | chr2:196310459             | SLC39A10:miR-224       |
| rs10552975 | chr2:196310573             | SLC39A10:miR-103       |
| rs10552975 | chr2:196310573             | SLC39A10:miR-107       |
| rs10552975 | chr2:196310573             | SLC39A10:miR-570       |
| rs57151481 | chr2:197567952             | ANKRD44:miR-630        |
| rs1062887  | chr2:197965185             | SF3B1:miR-17-3p        |
| rs11070    | chr2:198048021             | COQ10B:miR-624         |
| rs11551340 | chr2:198059582             | HSPD1:miR-524*         |
| rs11551340 | chr2:198059582             | HSPD1:miR-453          |
| rs3860440  | chr2:198059745             | HSPD1:miR-148a         |
| rs3860441  | chr2:198059755             | HSPD1:miR-135a         |
| rs3860441  | chr2:198059755             | HSPD1:miR-135b         |
| rs12392    | chr2:198059774             | HSPD1:miR-425-3p       |
| rs12392    | chr2:198059774             | HSPD1:miR-1            |
| rs12392    | chr2:198059774             | HSPD1:miR-206          |
| rs3877628  | chr2:198059891             | HSPD1:miR-140          |
| rs34094655 | chr2:198124835             | MOBKL3:miR-199a        |
| rs34094655 | chr2:198124835             | MOBKL3:miR-199b        |
| rs6435006  | chr2:199844828             | SATB2:miR-636          |
| rs12993660 | chr2:199844904             | SATB2:miR-640          |
| rs35305246 | chr2:201062032             | KCTD18:miR-519d        |
| rs55884229 | chr2:201396295             | BZW1:miR-659           |
| rs56192577 | chr2:201396569             | BZW1:miR-373*          |
| rs7224     | chr2:201426155             | CLK1:miR-559           |
| rs7224     | chr2:201426155             | CLK1:miR-30a-5p        |
| rs7224     | chr2:201426155             | CLK1:miR-30b           |
| rs7224     | chr2:201426155             | CLK1:miR-30c           |
| rs7224     | chr2:201426155             | CLK1:miR-30d           |
| rs7224     | chr2:201426155             | CLK1:miR-30e-5p        |
| rs7224     | chr2:201426155             | CLK1:miR-302a*         |
| rs3731717  | chr2:201553538             | FAM126B:miR-18a        |
| rs3731717  | chr2:201553538             | FAM126B:miR-18b        |
| rs3731717  | chr2:201553538             | FAM126B:miR-519a       |
| rs3731717  | chr2:201553538             | FAM126B:miR-519b       |
| rs3731717  | chr2:201553538             | FAM126B:miR-519c       |
| rs3731717  | chr2:201553538             | FAM126B:miR-33         |
| rs7572177  | chr2:203133713             | BMPR2:miR-768-5p       |
| rs7572177  | chr2:203133713             | BMPR2:miR-532          |

**Supplemental Table 4: SNPs in miRNA target sites based on PITA prediction**

| <b>SNP</b> | <b>SNP Position (hg18)</b> | <b>PITA Prediction</b> |
|------------|----------------------------|------------------------|
| rs6435156  | chr2:203133720             | BMP2:miR-532           |
| rs10870    | chr2:203347110             | ICA1L:miR-579          |
| rs1058733  | chr2:204005034             | ABI2:miR-608           |
| rs2264901  | chr2:204007047             | RAPH1:miR-135a         |
| rs2264901  | chr2:204007047             | RAPH1:miR-135b         |
| rs10650425 | chr2:204007048             | RAPH1:miR-135a         |
| rs10650425 | chr2:204007048             | RAPH1:miR-135b         |
| rs5837873  | chr2:204310457             | CD28:miR-30a-3p        |
| rs5837873  | chr2:204310457             | CD28:miR-30e-3p        |
| rs17387557 | chr2:206369947             | NRP2:miR-141           |
| rs17387557 | chr2:206369947             | NRP2:miR-200a          |
| rs17387557 | chr2:206369947             | NRP2:miR-429           |
| rs62195360 | chr2:206575695             | FLJ20309:miR-181a      |
| rs62195360 | chr2:206575695             | FLJ20309:miR-181c      |
| rs1062344  | chr2:206576967             | FLJ20309:miR-548b      |
| rs1062344  | chr2:206576967             | FLJ20309:miR-548c      |
| rs1062344  | chr2:206576967             | FLJ20309:miR-631       |
| rs56267720 | chr2:208170290             | CREB1:miR-526b         |
| rs35564745 | chr2:208336085             | FZD5:miR-579           |
| rs35564745 | chr2:208336085             | FZD5:miR-659           |
| rs35564745 | chr2:208336085             | FZD5:miR-24            |
| rs15344    | chr2:208809341             | IDH1:miR-25            |
| rs15344    | chr2:208809341             | IDH1:miR-367           |
| rs15344    | chr2:208809341             | IDH1:miR-92            |
| rs15344    | chr2:208809341             | IDH1:miR-92b           |
| rs16843614 | chr2:210303569             | MAP2:miR-199a          |
| rs16843614 | chr2:210303569             | MAP2:miR-199b          |
| rs58781149 | chr2:210304053             | MAP2:miR-576           |
| rs1595066  | chr2:211949970             | ERBB4:miR-520g         |
| rs1595066  | chr2:211949970             | ERBB4:miR-520h         |
| rs1595066  | chr2:211949970             | ERBB4:miR-519d         |
| rs1595066  | chr2:211949970             | ERBB4:miR-519e         |
| rs1595066  | chr2:211949970             | ERBB4:miR-515-3p       |
| rs10932374 | chr2:211952648             | ERBB4:miR-140          |
| rs16846004 | chr2:211955561             | ERBB4:miR-145          |
| rs16846006 | chr2:211955573             | ERBB4:miR-205          |
| rs59859328 | chr2:211955631             | ERBB4:miR-511          |
| rs60129893 | chr2:213573160             | IKZF2:miR-221          |
| rs62903760 | chr2:213573161             | IKZF2:miR-221          |
| rs11475792 | chr2:213573660             | IKZF2:miR-186          |
| rs35088894 | chr2:213579560             | IKZF2:miR-429          |
| rs16825063 | chr2:213580095             | IKZF2:miR-559          |
| rs1063617  | chr2:216778393             | XRCC5:miR-802          |
| rs11545386 | chr2:217245364             | IGFBP5:miR-154         |
| rs55977831 | chr2:217249624             | IGFBP5:miR-143         |
| rs3204750  | chr2:218919561             | PNKD:let-7a            |
| rs3204750  | chr2:218919561             | PNKD:let-7b            |
| rs3204750  | chr2:218919561             | PNKD:let-7c            |
| rs3204750  | chr2:218919561             | PNKD:let-7d            |
| rs3204750  | chr2:218919561             | PNKD:let-7f            |
| rs3204750  | chr2:218919561             | PNKD:let-7g            |
| rs3204750  | chr2:218919561             | PNKD:let-7i            |

**Supplemental Table 4: SNPs in miRNA target sites based on PITA prediction**

| <b>SNP</b> | <b>SNP Position (hg18)</b> | <b>PITA Prediction</b> |
|------------|----------------------------|------------------------|
| rs3204750  | chr2:218919561             | PNKD:miR-98            |
| rs14998    | chr2:219023338             | USP37:miR-577          |
| rs1139918  | chr2:219756015             | C2orf17:miR-539        |
| rs3755048  | chr2:219793146             | ATG9A:miR-637          |
| rs3755048  | chr2:219793146             | ATG9A:miR-223          |
| rs35394266 | chr2:220123075             | MGC99813:miR-602       |
| rs3731855  | chr2:221993124             | EPHA4:miR-499          |
| rs13385757 | chr2:221993236             | EPHA4:miR-138          |
| rs55877777 | chr2:223515174             | ACSL3:miR-494          |
| rs55877777 | chr2:223515174             | ACSL3:miR-641          |
| rs58567926 | chr2:223516215             | ACSL3:miR-381          |
| rs58567926 | chr2:223516215             | ACSL3:miR-369-3p       |
| rs58567926 | chr2:223516215             | ACSL3:miR-374          |
| rs34008338 | chr2:223628310             | KCNE4:miR-204          |
| rs34008338 | chr2:223628310             | KCNE4:miR-211          |
| rs28362499 | chr2:225045961             | CUL3:miR-577           |
| rs1045654  | chr2:225338477             | DOCK10:miR-631         |
| rs34286846 | chr2:227308444             | IRS1:miR-431           |
| rs15625    | chr2:227309125             | IRS1:miR-182*          |
| rs13397672 | chr2:231088771             | SP100:miR-626          |
| rs35666795 | chr2:231088979             | SP100:miR-450          |
| rs35666795 | chr2:231088979             | SP100:miR-129          |
| rs6716468  | chr2:231391865             | CAB39:miR-671          |
| rs35194787 | chr2:232286054             | PTMA:miR-106a          |
| rs35194787 | chr2:232286054             | PTMA:miR-106b          |
| rs35194787 | chr2:232286054             | PTMA:miR-17-5p         |
| rs35194787 | chr2:232286054             | PTMA:miR-20a           |
| rs35194787 | chr2:232286054             | PTMA:miR-20b           |
| rs60365791 | chr2:232381635             | COPS7B:miR-568         |
| rs2026     | chr2:234045405             | DGKD:miR-369-3p        |
| rs2026     | chr2:234045405             | DGKD:miR-493-5p        |
| rs4589703  | chr2:235627545             | SH3BP4:miR-132         |
| rs4589703  | chr2:235627545             | SH3BP4:miR-212         |
| rs11547123 | chr2:235629015             | SH3BP4:miR-561         |
| rs11547123 | chr2:235629015             | SH3BP4:miR-577         |
| rs11547123 | chr2:235629015             | SH3BP4:miR-488         |
| rs8691     | chr2:235629016             | SH3BP4:miR-561         |
| rs8691     | chr2:235629016             | SH3BP4:miR-577         |
| rs8691     | chr2:235629016             | SH3BP4:miR-488         |
| rs2230360  | chr2:241817653             | HDLBP:miR-214          |
| rs13080869 | chr3:423854                | CHL1:miR-548c          |
| rs3856876  | chr3:425391                | CHL1:miR-19a           |
| rs3856876  | chr3:425391                | CHL1:miR-19b           |
| rs3856876  | chr3:425391                | CHL1:miR-568           |
| rs3956165  | chr3:425534                | CHL1:miR-515-3p        |
| rs11554679 | chr3:425835                | CHL1:miR-618           |
| rs163352   | chr3:3073041               | CNTN4:miR-384          |
| rs7638691  | chr3:3073596               | CNTN4:miR-635          |
| rs10888    | chr3:3074362               | CNTN4:miR-135a         |
| rs10888    | chr3:3074362               | CNTN4:miR-135b         |
| rs34717483 | chr3:3863718               | LRRN1:miR-802          |
| rs34173470 | chr3:3864070               | LRRN1:miR-583          |



**Supplemental Table 4: SNPs in miRNA target sites based on PITA prediction**

| <b>SNP</b> | <b>SNP Position (hg18)</b> | <b>PITA Prediction</b> |
|------------|----------------------------|------------------------|
| rs41305987 | chr3:4863552               | ITPR1:miR-382          |
| rs35018130 | chr3:4863676               | ITPR1:miR-204          |
| rs35018130 | chr3:4863676               | ITPR1:miR-211          |
| rs36064013 | chr3:4864079               | ITPR1:miR-129          |
| rs1058377  | chr3:5001670               | BHLHB2:miR-147         |
| rs34105324 | chr3:5196127               | ARL8B:miR-612          |
| rs35231075 | chr3:5234325               | EDEM1:miR-653          |
| rs3840229  | chr3:7757488               | GRM7:miR-527           |
| rs56173829 | chr3:7757494               | GRM7:miR-527           |
| rs56173829 | chr3:7757494               | GRM7:miR-18a           |
| rs56173829 | chr3:7757494               | GRM7:miR-18b           |
| rs56173829 | chr3:7757494               | GRM7:miR-520g          |
| rs56173829 | chr3:7757494               | GRM7:miR-520h          |
| rs34145757 | chr3:7758042               | GRM7:miR-384           |
| rs17736455 | chr3:8997346               | SRGAP3:miR-542-3p      |
| rs13085756 | chr3:9494746               | SETD5:miR-136          |
| rs13085756 | chr3:9494746               | SETD5:miR-30a-5p       |
| rs13085756 | chr3:9494746               | SETD5:miR-30b          |
| rs13085756 | chr3:9494746               | SETD5:miR-30c          |
| rs13085756 | chr3:9494746               | SETD5:miR-30d          |
| rs13085756 | chr3:9494746               | SETD5:miR-30e-5p       |
| rs13085758 | chr3:9494749               | SETD5:miR-30a-5p       |
| rs13085758 | chr3:9494749               | SETD5:miR-30b          |
| rs13085758 | chr3:9494749               | SETD5:miR-30c          |
| rs13085758 | chr3:9494749               | SETD5:miR-30d          |
| rs13085758 | chr3:9494749               | SETD5:miR-30e-5p       |
| rs1801128  | chr3:9773755               | OGG1:miR-96            |
| rs3219014  | chr3:9773760               | OGG1:miR-96            |
| rs35674    | chr3:10343577              | ATP2B2:miR-326         |
| rs56340609 | chr3:10344842              | ATP2B2:miR-585         |
| rs1062616  | chr3:11053758              | SLC6A1:miR-668         |
| rs1062616  | chr3:11053758              | SLC6A1:miR-422b        |
| rs1803491  | chr3:11574242              | VGLL4:miR-766          |
| rs11553736 | chr3:11806953              | C3orf31:miR-410        |
| rs9267     | chr3:11806953              | C3orf31:miR-410        |
| rs1043517  | chr3:12200452              | SYN2:miR-199a*         |
| rs930541   | chr3:12200597              | SYN2:miR-28            |
| rs35963048 | chr3:12202130              | SYN2:miR-629           |
| rs59526796 | chr3:12207895              | SYN2:miR-409-3p        |
| rs3730299  | chr3:12600895              | RAF1:miR-493-3p        |
| rs3202499  | chr3:13654776              | FBLN2:miR-27a          |
| rs3202499  | chr3:13654776              | FBLN2:miR-27b          |
| rs2731310  | chr3:14159096              | TMEM43:miR-132         |
| rs2731310  | chr3:14159096              | TMEM43:miR-212         |
| rs2731309  | chr3:14159097              | TMEM43:miR-132         |
| rs2731309  | chr3:14159097              | TMEM43:miR-212         |
| rs35363110 | chr3:14501617              | SLC6A6:miR-548c        |
| rs35143785 | chr3:15065290              | NR2C2:miR-648          |
| rs35143785 | chr3:15065290              | NR2C2:miR-595          |
| rs3732719  | chr3:15683807              | ANKRD28:miR-373*       |
| rs3732719  | chr3:15683807              | ANKRD28:miR-561        |
| rs13325168 | chr3:15685674              | ANKRD28:miR-519e       |

**Supplemental Table 4: SNPs in miRNA target sites based on PITA prediction**

| <b>SNP</b> | <b>SNP Position (hg18)</b> | <b>PITA Prediction</b> |
|------------|----------------------------|------------------------|
| rs13325168 | chr3:15685674              | ANKRD28:miR-515-3p     |
| rs3736124  | chr3:20000427              | RAB5A:miR-627          |
| rs41276509 | chr3:20169259              | PCAF:miR-561           |
| rs4858770  | chr3:20169427              | PCAF:miR-559           |
| rs4539893  | chr3:23996088              | NR1D2:miR-520g         |
| rs4539893  | chr3:23996088              | NR1D2:miR-520h         |
| rs4539893  | chr3:23996088              | NR1D2:miR-577          |
| rs4505634  | chr3:23996104              | NR1D2:miR-577          |
| rs4505634  | chr3:23996104              | NR1D2:miR-26a          |
| rs4505634  | chr3:23996104              | NR1D2:miR-26b          |
| rs15505    | chr3:24135670              | THRB:miR-141           |
| rs15505    | chr3:24135670              | THRB:miR-200a          |
| rs28509419 | chr3:25613194              | RARB:miR-503           |
| rs10638799 | chr3:25614270              | RARB:miR-186           |
| rs34384883 | chr3:25614271              | RARB:miR-186           |
| rs11305471 | chr3:30021347              | RBMS3:miR-320          |
| rs10696791 | chr3:30021426              | RBMS3:miR-129          |
| rs11322142 | chr3:30021431              | RBMS3:miR-129          |
| rs17026326 | chr3:30708360              | TGFBR2:miR-19a         |
| rs17026326 | chr3:30708360              | TGFBR2:miR-19b         |
| rs35934901 | chr3:30708406              | TGFBR2:miR-494         |
| rs35934901 | chr3:30708406              | TGFBR2:miR-641         |
| rs35934901 | chr3:30708406              | TGFBR2:miR-568         |
| rs62252145 | chr3:32498880              | CMTM6:miR-583          |
| rs11260    | chr3:33405097              | UBP1:miR-583           |
| rs11260    | chr3:33405097              | UBP1:miR-613           |
| rs3209345  | chr3:33514259              | CLASP2:miR-375         |
| rs17035860 | chr3:37007257              | EPM2AIP1:miR-577       |
| rs34667536 | chr3:37997590              | CTDSPL:miR-559         |
| rs1128772  | chr3:38499847              | ACVR2B:miR-612         |
| rs10421    | chr3:38499849              | ACVR2B:miR-612         |
| rs1058945  | chr3:38507515              | ACVR2B:miR-134         |
| rs35863066 | chr3:38507586              | ACVR2B:miR-520g        |
| rs35863066 | chr3:38507586              | ACVR2B:miR-520h        |
| rs35863066 | chr3:38507586              | ACVR2B:miR-373*        |
| rs45512996 | chr3:38565195              | SCN5A:let-7e           |
| rs45589543 | chr3:38565380              | SCN5A:miR-448          |
| rs13081294 | chr3:40276277              | MYRIP:miR-589          |
| rs13081294 | chr3:40276277              | MYRIP:miR-421          |
| rs11374095 | chr3:40328802              | EIF1B:miR-186          |
| rs10731    | chr3:40478751              | RPL14:miR-548b         |
| rs15369    | chr3:40478755              | RPL14:miR-548b         |
| rs34167918 | chr3:40550982              | ZNF621:miR-545         |
| rs11564479 | chr3:41256003              | CTNNB1:miR-199a        |
| rs11564479 | chr3:41256003              | CTNNB1:miR-199b        |
| rs4135388  | chr3:41256143              | CTNNB1:miR-185         |
| rs34854135 | chr3:41256163              | CTNNB1:miR-369-3p      |
| rs4135389  | chr3:41256209              | CTNNB1:miR-483         |
| rs34653633 | chr3:41256416              | CTNNB1:miR-561         |
| rs34653633 | chr3:41256416              | CTNNB1:miR-186         |
| rs4135387  | chr3:41256417              | CTNNB1:miR-561         |
| rs4135387  | chr3:41256417              | CTNNB1:miR-186         |

**Supplemental Table 4: SNPs in miRNA target sites based on PITA prediction**

| <b>SNP</b> | <b>SNP Position (hg18)</b> | <b>PITA Prediction</b> |
|------------|----------------------------|------------------------|
| rs34534133 | chr3:41256482              | CTNNB1:miR-558         |
| rs11708257 | chr3:47033061              | SETD2:miR-651          |
| rs11558994 | chr3:47033062              | SETD2:miR-651          |
| rs3731562  | chr3:48174881              | CDC25A:let-7a          |
| rs3731562  | chr3:48174881              | CDC25A:let-7b          |
| rs3731562  | chr3:48174881              | CDC25A:let-7c          |
| rs3731562  | chr3:48174881              | CDC25A:let-7d          |
| rs3731562  | chr3:48174881              | CDC25A:let-7f          |
| rs3731562  | chr3:48174881              | CDC25A:let-7g          |
| rs3731562  | chr3:48174881              | CDC25A:let-7i          |
| rs3731562  | chr3:48174881              | CDC25A:miR-98          |
| rs3731562  | chr3:48174881              | CDC25A:miR-196a        |
| rs3731562  | chr3:48174881              | CDC25A:miR-196b        |
| rs11552877 | chr3:48460435              | CCDC72:miR-561         |
| rs11552877 | chr3:48460435              | CCDC72:miR-524*        |
| rs1803298  | chr3:48576627              | COL7A1:miR-139         |
| rs1803298  | chr3:48576627              | COL7A1:miR-27a         |
| rs1803298  | chr3:48576627              | COL7A1:miR-27b         |
| rs1803298  | chr3:48576627              | COL7A1:miR-128a        |
| rs1803298  | chr3:48576627              | COL7A1:miR-128b        |
| rs3172494  | chr3:48706491              | IHPK2:miR-423          |
| rs11552765 | chr3:49371637              | RHOA:miR-561           |
| rs8179166  | chr3:49371712              | RHOA:miR-490           |
| rs8857     | chr3:49372043              | RHOA:miR-217           |
| rs8857     | chr3:49372043              | RHOA:miR-222           |
| rs1804289  | chr3:49372105              | RHOA:miR-128a          |
| rs1804289  | chr3:49372105              | RHOA:miR-128b          |
| rs14566    | chr3:49372318              | RHOA:miR-196a          |
| rs14566    | chr3:49372318              | RHOA:miR-196b          |
| rs12583    | chr3:49546466              | DAG1:miR-188           |
| rs35841879 | chr3:49548014              | DAG1:miR-190           |
| rs1060962  | chr3:49683506              | BSN:miR-448            |
| rs1060962  | chr3:49683506              | BSN:miR-493-5p         |
| rs1060962  | chr3:49683506              | BSN:miR-148a           |
| rs1060962  | chr3:49683506              | BSN:miR-148b           |
| rs1060962  | chr3:49683506              | BSN:miR-152            |
| rs1060970  | chr3:49683773              | BSN:miR-765            |
| rs11549672 | chr3:50338192              | TUSC2:miR-372          |
| rs11549672 | chr3:50338192              | TUSC2:miR-93           |
| rs11549672 | chr3:50338192              | TUSC2:miR-512-3p       |
| rs36012270 | chr3:50338202              | TUSC2:miR-325          |
| rs59591443 | chr3:51395449              | DOCK3:miR-577          |
| rs11706794 | chr3:51396292              | DOCK3:miR-19a          |
| rs11706794 | chr3:51396292              | DOCK3:miR-19b          |
| rs11706794 | chr3:51396292              | DOCK3:miR-568          |
| rs3762712  | chr3:51396407              | DOCK3:miR-522          |
| rs11540366 | chr3:51406807              | RBM15B:miR-577         |
| rs11540366 | chr3:51406807              | RBM15B:miR-559         |
| rs2292159  | chr3:51966548              | GPR62:miR-30a-3p       |
| rs2292159  | chr3:51966548              | GPR62:miR-30e-3p       |
| rs1045671  | chr3:51966579              | PCBP4:miR-146a         |
| rs1045671  | chr3:51966579              | PCBP4:miR-146b         |

**Supplemental Table 4: SNPs in miRNA target sites based on PITA prediction**

| <b>SNP</b> | <b>SNP Position (hg18)</b> | <b>PITA Prediction</b> |
|------------|----------------------------|------------------------|
| rs11924827 | chr3:51966655              | PCBP4:miR-575          |
| rs61741642 | chr3:52258813              | PPM1M:miR-598          |
| rs1767     | chr3:52265514              | TMEM113:miR-518b       |
| rs1767     | chr3:52265514              | TMEM113:miR-518c       |
| rs1767     | chr3:52265514              | TMEM113:miR-518d       |
| rs57823393 | chr3:52266118              | TMEM113:miR-555        |
| rs34922530 | chr3:52266414              | TMEM113:miR-181b       |
| rs34922530 | chr3:52266414              | TMEM113:miR-181d       |
| rs10575729 | chr3:53295104              | DCP1A:miR-421          |
| rs10575729 | chr3:53295104              | DCP1A:miR-545          |
| rs35336193 | chr3:53296462              | DCP1A:miR-27a          |
| rs35336193 | chr3:53296462              | DCP1A:miR-27b          |
| rs35336193 | chr3:53296462              | DCP1A:miR-128a         |
| rs35336193 | chr3:53296462              | DCP1A:miR-128b         |
| rs35336193 | chr3:53296462              | DCP1A:miR-769-5p       |
| rs35103194 | chr3:53296483              | DCP1A:miR-580          |
| rs34241531 | chr3:53820905              | CACNA1D:miR-151        |
| rs3830517  | chr3:55083358              | CACNA2D3:miR-767-5p    |
| rs358077   | chr3:55083398              | CACNA2D3:miR-433       |
| rs17055392 | chr3:55475740              | WNT5A:miR-578          |
| rs17055392 | chr3:55475740              | WNT5A:miR-581          |
| rs1056613  | chr3:55476727              | WNT5A:miR-203          |
| rs60853936 | chr3:55476884              | WNT5A:miR-30a-5p       |
| rs60853936 | chr3:55476884              | WNT5A:miR-30b          |
| rs60853936 | chr3:55476884              | WNT5A:miR-30c          |
| rs60853936 | chr3:55476884              | WNT5A:miR-30d          |
| rs60853936 | chr3:55476884              | WNT5A:miR-30e-5p       |
| rs3178762  | chr3:55476957              | WNT5A:miR-548d         |
| rs11426209 | chr3:56630821              | CCDC66:miR-153         |
| rs5849222  | chr3:57588752              | FLJ34969:miR-519e      |
| rs5849222  | chr3:57588752              | FLJ34969:miR-515-3p    |
| rs56296846 | chr3:57888696              | SLMAP:miR-522          |
| rs9986     | chr3:58255446              | ABHD6:miR-582          |
| rs34753442 | chr3:64054819              | PRICKLE2:miR-573       |
| rs34753442 | chr3:64054819              | PRICKLE2:miR-143       |
| rs34585452 | chr3:64057869              | PRICKLE2:miR-33        |
| rs34585452 | chr3:64057869              | PRICKLE2:miR-33b       |
| rs62249882 | chr3:64058178              | PRICKLE2:miR-22        |
| rs9826322  | chr3:65321626              | MAGI1:miR-495          |
| rs35498666 | chr3:67143879              | KBTBD8:miR-660         |
| rs10550093 | chr3:69154794              | TMF1:miR-559           |
| rs36068708 | chr3:69154797              | TMF1:miR-559           |
| rs3821564  | chr3:69237076              | ARL6IP5:miR-380-3p     |
| rs11369213 | chr3:69302244              | FRMD4B:miR-382         |
| rs11447250 | chr3:69302245              | FRMD4B:miR-382         |
| rs34037301 | chr3:70098380              | MITF:miR-605           |
| rs576      | chr3:70099157              | MITF:miR-597           |
| rs576      | chr3:70099157              | MITF:miR-599           |
| rs35450611 | chr3:70099217              | MITF:miR-155           |
| rs36084453 | chr3:70099937              | MITF:miR-148b          |
| rs36084453 | chr3:70099937              | MITF:miR-152           |
| rs1043345  | chr3:70100089              | MITF:miR-512-3p        |

**Supplemental Table 4: SNPs in miRNA target sites based on PITA prediction**

| <b>SNP</b> | <b>SNP Position (hg18)</b> | <b>PITA Prediction</b> |
|------------|----------------------------|------------------------|
| rs17008063 | chr3:71089679              | FOXP1:miR-512-5p       |
| rs13082259 | chr3:71089749              | FOXP1:miR-155          |
| rs13082259 | chr3:71089749              | FOXP1:miR-371          |
| rs11425709 | chr3:71090229              | FOXP1:miR-103          |
| rs11425709 | chr3:71090229              | FOXP1:miR-107          |
| rs34865714 | chr3:71090495              | FOXP1:miR-655          |
| rs59473871 | chr3:71090608              | FOXP1:miR-583          |
| rs55867216 | chr3:72508116              | RYBP:miR-203           |
| rs55843310 | chr3:73514884              | PDZRN3:miR-382         |
| rs11127602 | chr3:77779010              | ROBO2:miR-493-5p       |
| rs11127602 | chr3:77779010              | ROBO2:miR-33           |
| rs14416    | chr3:87070407              | VGLL3:miR-138          |
| rs6551275  | chr3:88275113              | ZNF654:miR-153         |
| rs36097210 | chr3:89611514              | EPHA3:miR-625          |
| rs36097210 | chr3:89611514              | EPHA3:miR-625          |
| rs704586   | chr3:99997851              | DCBLD2:miR-582         |
| rs1058732  | chr3:99998659              | DCBLD2:miR-484         |
| rs1058732  | chr3:99998659              | DCBLD2:miR-24          |
| rs17270986 | chr3:100000762             | DCBLD2:miR-509         |
| rs1801864  | chr3:101565101             | TOMM70A:miR-214        |
| rs15266    | chr3:101565102             | TOMM70A:miR-214        |
| rs56809397 | chr3:101565535             | TOMM70A:miR-106a       |
| rs56809397 | chr3:101565535             | TOMM70A:miR-106b       |
| rs56809397 | chr3:101565535             | TOMM70A:miR-17-5p      |
| rs56809397 | chr3:101565535             | TOMM70A:miR-20a        |
| rs56809397 | chr3:101565535             | TOMM70A:miR-20b        |
| rs1045610  | chr3:101566710             | TOMM70A:miR-302c*      |
| rs11332311 | chr3:101566795             | TOMM70A:miR-421        |
| rs11332311 | chr3:101566795             | TOMM70A:miR-545        |
| rs10703455 | chr3:101950308             | TFG:miR-493-5p         |
| rs5851221  | chr3:101950879             | ABI3BP:miR-217         |
| rs5851221  | chr3:101950879             | ABI3BP:miR-222         |
| rs1027704  | chr3:101951120             | ABI3BP:miR-181b        |
| rs1027704  | chr3:101951120             | ABI3BP:miR-181d        |
| rs4061093  | chr3:101951120             | ABI3BP:miR-181b        |
| rs4061093  | chr3:101951120             | ABI3BP:miR-181d        |
| rs1045682  | chr3:102794325             | PCNP:miR-507           |
| rs35317759 | chr3:102794958             | PCNP:miR-140           |
| rs35317759 | chr3:102794958             | PCNP:miR-522           |
| rs13088976 | chr3:103061032             | NFKBIZ:miR-610         |
| rs35312427 | chr3:106859938             | CBLB:miR-129           |
| rs11402320 | chr3:109244904             | CD47:miR-577           |
| rs340162   | chr3:113319639             | C3orf52:miR-559        |
| rs7648784  | chr3:114921497             | MAK3:miR-590           |
| rs14360    | chr3:116922697             | GAP43:miR-522          |
| rs14360    | chr3:116922697             | GAP43:miR-373*         |
| rs28399411 | chr3:116922800             | GAP43:miR-32           |
| rs28399411 | chr3:116922800             | GAP43:miR-363          |
| rs12173    | chr3:121597549             | FSTL1:miR-601          |
| rs6782025  | chr3:122620666             | STXBP5L:miR-584        |
| rs16833133 | chr3:123627563             | KPNA1:miR-520d*        |
| rs3749210  | chr3:123627787             | KPNA1:miR-455          |

**Supplemental Table 4: SNPs in miRNA target sites based on PITA prediction**

| <b>SNP</b> | <b>SNP Position (hg18)</b> | <b>PITA Prediction</b> |
|------------|----------------------------|------------------------|
| rs17201246 | chr3:123628160             | KPNA1:miR-629          |
| rs14845    | chr3:124813898             | MYLK:miR-142-3p        |
| rs34709307 | chr3:124814466             | MYLK:miR-561           |
| rs35145256 | chr3:126433474             | ZNF148:miR-502         |
| rs35145256 | chr3:126433474             | ZNF148:miR-370         |
| rs11456717 | chr3:126730881             | OSBPL11:miR-421        |
| rs11456717 | chr3:126730881             | OSBPL11:miR-545        |
| rs35866601 | chr3:127662927             | ZXDC:miR-223           |
| rs11540033 | chr3:128236820             | PLXNA1:miR-101         |
| rs34069018 | chr3:129681075             | GATA2:miR-659          |
| rs34629369 | chr3:130016240             | RAB7:miR-583           |
| rs1050006  | chr3:130016261             | RAB7:miR-1             |
| rs1050006  | chr3:130016261             | RAB7:miR-206           |
| rs11542608 | chr3:130371608             | CNBP:miR-382           |
| rs3208356  | chr3:130852085             | TMCC1:miR-579          |
| rs34050914 | chr3:130852293             | TMCC1:miR-548b         |
| rs34050914 | chr3:130852293             | TMCC1:miR-548c         |
| rs11434122 | chr3:132203059             | ATP2C1:miR-153         |
| rs11542183 | chr3:132203235             | ATP2C1:miR-577         |
| rs11542183 | chr3:132203235             | ATP2C1:miR-559         |
| rs5852630  | chr3:132736580             | CPNE4:miR-186          |
| rs17412738 | chr3:133740109             | DNAJC13:miR-511        |
| rs13576    | chr3:133740436             | DNAJC13:miR-181b       |
| rs13576    | chr3:133740436             | DNAJC13:miR-181d       |
| rs13576    | chr3:133740436             | DNAJC13:miR-574        |
| rs13576    | chr3:133740436             | DNAJC13:miR-25         |
| rs13576    | chr3:133740436             | DNAJC13:miR-367        |
| rs13576    | chr3:133740436             | DNAJC13:miR-92         |
| rs13576    | chr3:133740436             | DNAJC13:miR-92b        |
| rs6671     | chr3:133740437             | DNAJC13:miR-181b       |
| rs6671     | chr3:133740437             | DNAJC13:miR-181d       |
| rs6671     | chr3:133740437             | DNAJC13:miR-574        |
| rs6671     | chr3:133740437             | DNAJC13:miR-25         |
| rs6671     | chr3:133740437             | DNAJC13:miR-367        |
| rs6671     | chr3:133740437             | DNAJC13:miR-92         |
| rs6671     | chr3:133740437             | DNAJC13:miR-92b        |
| rs3193182  | chr3:134597640             | TMEM108:miR-320        |
| rs56260919 | chr3:134790405             | CDV3:miR-559           |
| rs2293374  | chr3:135029935             | RAB6B:miR-147          |
| rs1131974  | chr3:135557624             | AMOTL2:miR-382         |
| rs57278795 | chr3:135802634             | KY:miR-520g            |
| rs57278795 | chr3:135802634             | KY:miR-520h            |
| rs1880375  | chr3:135804853             | KY:miR-374             |
| rs34290284 | chr3:135804856             | KY:miR-374             |
| rs696520   | chr3:137539551             | STAG1:miR-633          |
| rs3597     | chr3:139447174             | ARMC8:miR-199a*        |
| rs3597     | chr3:139447174             | ARMC8:miR-153          |
| rs11716014 | chr3:139497639             | ARMC8:miR-589          |
| rs11716014 | chr3:139497639             | ARMC8:miR-548d         |
| rs35338784 | chr3:142178102             | SLC25A36:miR-651       |
| rs16852263 | chr3:143512609             | XRN1:miR-637           |
| rs1272497  | chr3:144019510             | PCOLCE2:miR-25         |

**Supplemental Table 4: SNPs in miRNA target sites based on PITA prediction**

| <b>SNP</b> | <b>SNP Position (hg18)</b> | <b>PITA Prediction</b> |
|------------|----------------------------|------------------------|
| rs1272497  | chr3:144019510             | PCOLCE2:miR-367        |
| rs1272497  | chr3:144019510             | PCOLCE2:miR-92         |
| rs1272497  | chr3:144019510             | PCOLCE2:miR-92b        |
| rs35706965 | chr3:144258178             | SR140:miR-128a         |
| rs35706965 | chr3:144258178             | SR140:miR-128b         |
| rs8831     | chr3:144261685             | SR140:miR-520d*        |
| rs17667256 | chr3:145192058             | C3orf58:miR-490        |
| rs1061262  | chr3:147269980             | PLOD2:miR-96           |
| rs2279829  | chr3:148589009             | ZIC4:miR-519e          |
| rs1802144  | chr3:151161677             | RNF13:miR-382          |
| rs1052368  | chr3:151165422             | PFN2:miR-609           |
| rs1052279  | chr3:151165485             | PFN2:miR-380-3p        |
| rs11559021 | chr3:151166490             | PFN2:miR-563           |
| rs11537936 | chr3:151659284             | TSC22D2:miR-489        |
| rs62956961 | chr3:151660050             | TSC22D2:miR-570        |
| rs11330414 | chr3:151660062             | TSC22D2:miR-577        |
| rs10650924 | chr3:151743125             | SERP1:miR-130a         |
| rs10650924 | chr3:151743125             | SERP1:miR-130b         |
| rs10650924 | chr3:151743125             | SERP1:miR-301          |
| rs10650924 | chr3:151743125             | SERP1:miR-454-3p       |
| rs3086794  | chr3:151743129             | SERP1:miR-448          |
| rs35579941 | chr3:151744480             | SERP1:miR-122a         |
| rs10596613 | chr3:151784706             | EIF2A:miR-203          |
| rs34423011 | chr3:153662989             | MBNL1:miR-380-3p       |
| rs34423011 | chr3:153662989             | MBNL1:miR-302c*        |
| rs60679534 | chr3:153663007             | MBNL1:miR-511          |
| rs4356798  | chr3:153663268             | MBNL1:miR-590          |
| rs1801768  | chr3:153664110             | MBNL1:miR-589          |
| rs3211341  | chr3:153666093             | MBNL1:miR-633          |
| rs3211342  | chr3:153666177             | MBNL1:miR-142-5p       |
| rs1801771  | chr3:153666196             | MBNL1:miR-606          |
| rs13093372 | chr3:154364228             | RAP2B:miR-584          |
| rs61760458 | chr3:156382035             | MME:miR-594            |
| rs3085724  | chr3:157738210             | KCNAB1:miR-548a        |
| rs11546246 | chr3:158348494             | CCNL1:miR-130a         |
| rs11546246 | chr3:158348494             | CCNL1:miR-130b         |
| rs11546246 | chr3:158348494             | CCNL1:miR-301          |
| rs11546246 | chr3:158348494             | CCNL1:miR-454-3p       |
| rs11546246 | chr3:158348494             | CCNL1:miR-582          |
| rs2614     | chr3:158643693             | PTX3:miR-506           |
| rs6441173  | chr3:159297782             | SHOX2:miR-578          |
| rs6441173  | chr3:159297782             | SHOX2:miR-581          |
| rs56225390 | chr3:161458084             | IFT80:miR-142-5p       |
| rs56389920 | chr3:161700703             | KPNA4:miR-486          |
| rs11553778 | chr3:161701473             | KPNA4:miR-527          |
| rs11391347 | chr3:166388351             | SLITRK3:miR-518b       |
| rs11391347 | chr3:166388351             | SLITRK3:miR-518c       |
| rs11391347 | chr3:166388351             | SLITRK3:miR-518d       |
| rs9828429  | chr3:171297425             | PHC3:miR-186           |
| rs11707876 | chr3:171505135             | PRKCI:miR-203          |
| rs11540060 | chr3:171506265             | PRKCI:miR-588          |
| rs495702   | chr3:173598334             | FND3B:miR-573          |

**Supplemental Table 4: SNPs in miRNA target sites based on PITA prediction**

| <b>SNP</b> | <b>SNP Position (hg18)</b> | <b>PITA Prediction</b> |
|------------|----------------------------|------------------------|
| rs13064403 | chr3:173831306             | AADACL1:miR-517a       |
| rs13064403 | chr3:173831306             | AADACL1:miR-517c       |
| rs35755694 | chr3:178224138             | TBL1XR1:miR-18a*       |
| rs34664728 | chr3:178224366             | TBL1XR1:miR-202        |
| rs13064969 | chr3:178224664             | TBL1XR1:miR-503        |
| rs13065151 | chr3:178224781             | TBL1XR1:miR-30a-5p     |
| rs13065151 | chr3:178224781             | TBL1XR1:miR-30b        |
| rs13065151 | chr3:178224781             | TBL1XR1:miR-30c        |
| rs13065151 | chr3:178224781             | TBL1XR1:miR-30d        |
| rs13065151 | chr3:178224781             | TBL1XR1:miR-30e-5p     |
| rs13087746 | chr3:178224806             | TBL1XR1:miR-34a        |
| rs13087746 | chr3:178224806             | TBL1XR1:miR-34c        |
| rs13087746 | chr3:178224806             | TBL1XR1:miR-449        |
| rs13087746 | chr3:178224806             | TBL1XR1:miR-449b       |
| rs13087746 | chr3:178224806             | TBL1XR1:miR-142-3p     |
| rs13087748 | chr3:178224808             | TBL1XR1:miR-34a        |
| rs13087748 | chr3:178224808             | TBL1XR1:miR-34c        |
| rs13087748 | chr3:178224808             | TBL1XR1:miR-449        |
| rs13087748 | chr3:178224808             | TBL1XR1:miR-449b       |
| rs13087748 | chr3:178224808             | TBL1XR1:miR-142-3p     |
| rs13065166 | chr3:178224841             | TBL1XR1:miR-570        |
| rs7616373  | chr3:178225516             | TBL1XR1:miR-335        |
| rs6769752  | chr3:180788540             | ACTL6A:miR-203         |
| rs35845439 | chr3:181810200             | TTC14:miR-383          |
| rs11544675 | chr3:181810457             | TTC14:miR-143          |
| rs55637125 | chr3:182176697             | FXR1:miR-432           |
| rs3026204  | chr3:182176743             | FXR1:miR-609           |
| rs11915160 | chr3:182914265             | SOX2:miR-382           |
| rs11915160 | chr3:182914265             | SOX2:miR-524*          |
| rs1057949  | chr3:184144646             | DCUN1D1:miR-589        |
| rs11927407 | chr3:184883182             | KLHL24:miR-620         |
| rs4148595  | chr3:185120937             | ABCC5:miR-34b          |
| rs15954    | chr3:185384228             | AP2M1:miR-619          |
| rs1801035  | chr3:185384366             | AP2M1:miR-9            |
| rs11546693 | chr3:185460132             | CAMK2N2:miR-485-5p     |
| rs56077555 | chr3:185492902             | ECE2:miR-324-5p        |
| rs1061353  | chr3:185535701             | EIF4G1:miR-559         |
| rs63665263 | chr3:185590044             | CHRD:let-7a            |
| rs63665263 | chr3:185590044             | CHRD:let-7b            |
| rs63665263 | chr3:185590044             | CHRD:let-7c            |
| rs63665263 | chr3:185590044             | CHRD:let-7d            |
| rs63665263 | chr3:185590044             | CHRD:let-7f            |
| rs63665263 | chr3:185590044             | CHRD:let-7g            |
| rs63665263 | chr3:185590044             | CHRD:let-7i            |
| rs63665263 | chr3:185590044             | CHRD:miR-98            |
| rs2673     | chr3:185782518             | EPHB3:miR-526b         |
| rs2673     | chr3:185782518             | EPHB3:miR-145          |
| rs35514470 | chr3:185782736             | EPHB3:miR-342          |
| rs1949042  | chr3:186278589             | LOC285382:miR-384      |
| rs35690642 | chr3:186282322             | LOC285382:miR-568      |
| rs35690642 | chr3:186282322             | LOC285382:miR-548c     |
| rs3834186  | chr3:186683293             | MAP3K13:miR-450        |



**Supplemental Table 4: SNPs in miRNA target sites based on PITA prediction**

| <b>SNP</b> | <b>SNP Position (hg18)</b> | <b>PITA Prediction</b> |
|------------|----------------------------|------------------------|
| rs3834186  | chr3:186683293             | MAP3K13:miR-129        |
| rs3087964  | chr3:186831096             | SENP2:miR-520a*        |
| rs3087964  | chr3:186831096             | SENP2:miR-525          |
| rs7355810  | chr3:186845006             | IGF2BP2:miR-485-5p     |
| rs1061425  | chr3:187117369             | SFRS10:miR-142-3p      |
| rs56220221 | chr3:187349460             | DGKG:miR-568           |
| rs28480687 | chr3:187349461             | DGKG:miR-568           |
| rs3917143  | chr3:187990087             | EIF4A2:miR-511         |
| rs3206822  | chr3:187990259             | EIF4A2:miR-145         |
| rs34066451 | chr3:188922148             | BCL6:miR-548a          |
| rs34066451 | chr3:188922148             | BCL6:miR-9*            |
| rs58900133 | chr3:191507575             | CLDN1:miR-323          |
| rs17500920 | chr3:191507587             | CLDN1:miR-576          |
| rs1024949  | chr3:191830426             | IL1RAP:miR-539         |
| rs35806660 | chr3:193344338             | FGF12:miR-524*         |
| rs10419    | chr3:194897956             | OPA1:miR-484           |
| rs9414     | chr3:196724780             | PPP1R2:miR-106a        |
| rs9414     | chr3:196724780             | PPP1R2:miR-106b        |
| rs9414     | chr3:196724780             | PPP1R2:miR-17-5p       |
| rs9414     | chr3:196724780             | PPP1R2:miR-20a         |
| rs9414     | chr3:196724780             | PPP1R2:miR-20b         |
| rs3832181  | chr3:197567307             | UBXD7:miR-369-3p       |
| rs3832181  | chr3:197567307             | UBXD7:miR-655          |
| rs58204718 | chr3:197795721             | FBXO45:miR-558         |
| rs1046735  | chr3:198039964             | PAK2:miR-559           |
| rs1046736  | chr3:198039972             | PAK2:miR-545           |
| rs11555147 | chr3:198043639             | PAK2:miR-577           |
| rs11555147 | chr3:198043639             | PAK2:miR-559           |
| rs33985555 | chr4:77605                 | ZNF595:miR-186         |
| rs17164985 | chr4:752285                | PCGF3:miR-136          |
| rs55780751 | chr4:752296                | PCGF3:miR-27a          |
| rs55780751 | chr4:752296                | PCGF3:miR-27b          |
| rs1049497  | chr4:1664561               | SLBP:miR-624           |
| rs61738628 | chr4:1688860               | TMEM129:miR-141        |
| rs61738628 | chr4:1688860               | TMEM129:miR-200a       |
| rs61738628 | chr4:1688860               | TMEM129:miR-200b       |
| rs61738628 | chr4:1688860               | TMEM129:miR-200c       |
| rs34717201 | chr4:1914458               | WHSC1:miR-583          |
| rs3762940  | chr4:2203164               | C4orf15:miR-583        |
| rs1803019  | chr4:2704031               | C4orf8:miR-190         |
| rs35845646 | chr4:4471195               | D4S234E:miR-659        |
| rs35845646 | chr4:4471195               | D4S234E:miR-521        |
| rs11549294 | chr4:6935828               | KIAA0232:miR-139       |
| rs11549294 | chr4:6935828               | KIAA0232:miR-27a       |
| rs11549294 | chr4:6935828               | KIAA0232:miR-27b       |
| rs11549293 | chr4:6935955               | KIAA0232:miR-495       |
| rs1043704  | chr4:7109092               | MGC21874:miR-132       |
| rs1043704  | chr4:7109092               | MGC21874:miR-212       |
| rs34084354 | chr4:7109946               | MGC21874:miR-302c*     |
| rs28640905 | chr4:7795397               | SORCS2:miR-583         |
| rs1802032  | chr4:9685225               | WDR1:miR-544           |
| rs7441357  | chr4:12978588              | RAB28:miR-361          |

**Supplemental Table 4: SNPs in miRNA target sites based on PITA prediction**

| <b>SNP</b> | <b>SNP Position (hg18)</b> | <b>PITA Prediction</b> |
|------------|----------------------------|------------------------|
| rs35180652 | chr4:14678064              | CPEB2:miR-647          |
| rs35180652 | chr4:14678064              | CPEB2:miR-522          |
| rs12643066 | chr4:14678684              | CPEB2:miR-624          |
| rs10013449 | chr4:14678687              | CPEB2:miR-624          |
| rs34789260 | chr4:14679652              | CPEB2:miR-368          |
| rs13116725 | chr4:14679792              | CPEB2:miR-552          |
| rs13148665 | chr4:14679798              | CPEB2:miR-552          |
| rs55803189 | chr4:15772135              | TAPT1:miR-527          |
| rs56147460 | chr4:15772136              | TAPT1:miR-527          |
| rs14496    | chr4:16112325              | LDB2:miR-582           |
| rs16895878 | chr4:17456379              | LCORL:miR-302a         |
| rs16895878 | chr4:17456379              | LCORL:miR-302b         |
| rs16895878 | chr4:17456379              | LCORL:miR-302c         |
| rs16895878 | chr4:17456379              | LCORL:miR-302d         |
| rs16895878 | chr4:17456379              | LCORL:miR-373          |
| rs16895878 | chr4:17456379              | LCORL:miR-520a         |
| rs16895878 | chr4:17456379              | LCORL:miR-520b         |
| rs16895878 | chr4:17456379              | LCORL:miR-520c         |
| rs16895878 | chr4:17456379              | LCORL:miR-520d         |
| rs16895878 | chr4:17456379              | LCORL:miR-520e         |
| rs16895878 | chr4:17456379              | LCORL:miR-526b*        |
| rs2288308  | chr4:20340145              | KCNIP4:miR-302a        |
| rs2288308  | chr4:20340145              | KCNIP4:miR-302b        |
| rs2288308  | chr4:20340145              | KCNIP4:miR-302c        |
| rs2288308  | chr4:20340145              | KCNIP4:miR-302d        |
| rs2288308  | chr4:20340145              | KCNIP4:miR-373         |
| rs2288308  | chr4:20340145              | KCNIP4:miR-520a        |
| rs2288308  | chr4:20340145              | KCNIP4:miR-520b        |
| rs2288308  | chr4:20340145              | KCNIP4:miR-520c        |
| rs2288308  | chr4:20340145              | KCNIP4:miR-520d        |
| rs2288308  | chr4:20340145              | KCNIP4:miR-520e        |
| rs2288308  | chr4:20340145              | KCNIP4:miR-526b*       |
| rs12649419 | chr4:20340596              | KCNIP4:miR-188         |
| rs11723169 | chr4:22337396              | LOC643751:miR-31       |
| rs58448908 | chr4:23402849              | PPARGC1A:miR-369-3p    |
| rs58448908 | chr4:23402849              | PPARGC1A:miR-655       |
| rs17847356 | chr4:23403134              | PPARGC1A:miR-126*      |
| rs2279525  | chr4:23403350              | PPARGC1A:miR-323       |
| rs41359445 | chr4:23403442              | PPARGC1A:miR-600       |
| rs61351054 | chr4:23403791              | PPARGC1A:miR-659       |
| rs3774923  | chr4:23404162              | PPARGC1A:miR-510       |
| rs41398746 | chr4:23404662              | PPARGC1A:miR-626       |
| rs17847352 | chr4:23404892              | PPARGC1A:miR-570       |
| rs17847352 | chr4:23404892              | PPARGC1A:miR-103       |
| rs17847352 | chr4:23404892              | PPARGC1A:miR-107       |
| rs6821591  | chr4:23406098              | PPARGC1A:miR-187       |
| rs3796780  | chr4:24888086              | PI4K2B:miR-125a        |
| rs3796780  | chr4:24888086              | PI4K2B:miR-125b        |
| rs1129231  | chr4:26366002              | TBC1D19:miR-432        |
| rs35928836 | chr4:26634190              | STIM2:miR-145          |
| rs35928836 | chr4:26634190              | STIM2:miR-30a-3p       |
| rs35928836 | chr4:26634190              | STIM2:miR-30e-3p       |

**Supplemental Table 4: SNPs in miRNA target sites based on PITA prediction**

| <b>SNP</b> | <b>SNP Position (hg18)</b> | <b>PITA Prediction</b> |
|------------|----------------------------|------------------------|
| rs35840384 | chr4:26634191              | STIM2:miR-145          |
| rs36111019 | chr4:26634191              | STIM2:miR-145          |
| rs35840384 | chr4:26634191              | STIM2:miR-30a-3p       |
| rs35840384 | chr4:26634191              | STIM2:miR-30e-3p       |
| rs36111019 | chr4:26634191              | STIM2:miR-30a-3p       |
| rs36111019 | chr4:26634191              | STIM2:miR-30e-3p       |
| rs61795382 | chr4:30756789              | PCDH7:miR-516-5p       |
| rs16884447 | chr4:30757400              | PCDH7:miR-609          |
| rs58334461 | chr4:37289130              | RELL1:miR-106a         |
| rs58334461 | chr4:37289130              | RELL1:miR-106b         |
| rs58334461 | chr4:37289130              | RELL1:miR-17-5p        |
| rs58334461 | chr4:37289130              | RELL1:miR-20a          |
| rs58334461 | chr4:37289130              | RELL1:miR-20b          |
| rs58334461 | chr4:37289130              | RELL1:miR-302a         |
| rs58334461 | chr4:37289130              | RELL1:miR-302b         |
| rs58334461 | chr4:37289130              | RELL1:miR-302c         |
| rs58334461 | chr4:37289130              | RELL1:miR-302d         |
| rs58334461 | chr4:37289130              | RELL1:miR-373          |
| rs58334461 | chr4:37289130              | RELL1:miR-520a         |
| rs58334461 | chr4:37289130              | RELL1:miR-520b         |
| rs58334461 | chr4:37289130              | RELL1:miR-520c         |
| rs58334461 | chr4:37289130              | RELL1:miR-520d         |
| rs58334461 | chr4:37289130              | RELL1:miR-520e         |
| rs58334461 | chr4:37289130              | RELL1:miR-526b*        |
| rs62307873 | chr4:39501052              | PDS5A:miR-521          |
| rs1046817  | chr4:39502394              | PDS5A:miR-18a          |
| rs1046817  | chr4:39502394              | PDS5A:miR-18b          |
| rs1046817  | chr4:39502394              | PDS5A:miR-519a         |
| rs1046817  | chr4:39502394              | PDS5A:miR-519b         |
| rs1046817  | chr4:39502394              | PDS5A:miR-519c         |
| rs1063611  | chr4:41440919              | PHOX2B:miR-448         |
| rs1063611  | chr4:41440919              | PHOX2B:miR-493-5p      |
| rs35977299 | chr4:41441126              | PHOX2B:miR-649         |
| rs35350459 | chr4:41441177              | PHOX2B:miR-185         |
| rs6826373  | chr4:41441217              | PHOX2B:miR-622         |
| rs62412180 | chr4:41441234              | PHOX2B:miR-582         |
| rs10018324 | chr4:41808006              | CCDC4:miR-302c*        |
| rs1141790  | chr4:42106214              | ATP8A1:miR-613         |
| rs1128553  | chr4:44398963              | GNPDA2:miR-577         |
| rs45527131 | chr4:47833675              | TEC:miR-146a           |
| rs45527131 | chr4:47833675              | TEC:miR-146b           |
| rs45527131 | chr4:47833675              | TEC:miR-548a           |
| rs17577083 | chr4:52474992              | DCUN1D4:miR-571        |
| rs17051586 | chr4:53158323              | USP46:miR-451          |
| rs7680422  | chr4:54856274              | PDGFRA:miR-33          |
| rs7680422  | chr4:54856274              | PDGFRA:miR-33b         |
| rs7680422  | chr4:54856274              | PDGFRA:miR-544         |
| rs10529257 | chr4:55995516              | CLOCK:miR-490          |
| rs5858333  | chr4:55995806              | CLOCK:miR-368          |
| rs57031518 | chr4:56891127              | KIAA1211:miR-577       |
| rs58519345 | chr4:56891303              | KIAA1211:miR-656       |
| rs13122620 | chr4:56891317              | KIAA1211:miR-655       |

**Supplemental Table 4: SNPs in miRNA target sites based on PITA prediction**

| <b>SNP</b> | <b>SNP Position (hg18)</b> | <b>PITA Prediction</b> |
|------------|----------------------------|------------------------|
| rs13122620 | chr4:56891317              | KIAA1211:miR-369-3p    |
| rs1057974  | chr4:68167213              | UBE1L2:miR-583         |
| rs1057974  | chr4:68167213              | UBE1L2:miR-539         |
| rs35250360 | chr4:68862243              | YTHDC1:miR-145         |
| rs6934     | chr4:71877985              | RUFY3:miR-325          |
| rs7663882  | chr4:72067009              | MOBKL1A:miR-494        |
| rs7663882  | chr4:72067009              | MOBKL1A:miR-641        |
| rs34176960 | chr4:72067307              | MOBKL1A:miR-491        |
| rs1062677  | chr4:72652409              | SLC4A4:miR-576         |
| rs1062678  | chr4:72653121              | SLC4A4:miR-421         |
| rs1062679  | chr4:72653270              | SLC4A4:miR-373*        |
| rs1062679  | chr4:72653270              | SLC4A4:miR-616         |
| rs4403013  | chr4:72653320              | SLC4A4:miR-369-3p      |
| rs4403013  | chr4:72653320              | SLC4A4:miR-374         |
| rs34921070 | chr4:72653321              | SLC4A4:miR-369-3p      |
| rs34921070 | chr4:72653321              | SLC4A4:miR-374         |
| rs4403014  | chr4:72653325              | SLC4A4:miR-369-3p      |
| rs4403014  | chr4:72653325              | SLC4A4:miR-374         |
| rs41265675 | chr4:72653335              | SLC4A4:miR-23a         |
| rs41265675 | chr4:72653335              | SLC4A4:miR-23b         |
| rs10010105 | chr4:72654371              | SLC4A4:miR-510         |
| rs3088058  | chr4:72656424              | SLC4A4:miR-577         |
| rs3088058  | chr4:72656424              | SLC4A4:miR-559         |
| rs2682     | chr4:73365593              | ADAMTS3:miR-495        |
| rs3211021  | chr4:75080536              | CXCL5:miR-126*         |
| rs1460008  | chr4:75473146              | EREG:miR-181b          |
| rs1460008  | chr4:75473146              | EREG:miR-181d          |
| rs17000606 | chr4:76671643              | THAP6:miR-641          |
| rs533820   | chr4:77090424              | SDAD1:miR-548b         |
| rs1127710  | chr4:77254890              | NUP54:miR-577          |
| rs10654    | chr4:77254919              | NUP54:miR-522          |
| rs33933171 | chr4:77254934              | NUP54:miR-196a         |
| rs33933171 | chr4:77254934              | NUP54:miR-196b         |
| rs33933171 | chr4:77254934              | NUP54:miR-140          |
| rs9652     | chr4:77254938              | NUP54:miR-196a         |
| rs9652     | chr4:77254938              | NUP54:miR-196b         |
| rs9652     | chr4:77254938              | NUP54:miR-140          |
| rs13128914 | chr4:78855678              | CNOT6L:miR-182*        |
| rs17448633 | chr4:78857177              | CNOT6L:miR-143         |
| rs17448633 | chr4:78857177              | CNOT6L:miR-653         |
| rs3205281  | chr4:78857515              | CNOT6L:miR-643         |
| rs34724331 | chr4:78858029              | CNOT6L:miR-494         |
| rs34724331 | chr4:78858029              | CNOT6L:miR-641         |
| rs34724331 | chr4:78858029              | CNOT6L:miR-410         |
| rs34724331 | chr4:78858029              | CNOT6L:miR-369-3p      |
| rs1846912  | chr4:78858946              | CNOT6L:miR-559         |
| rs4109404  | chr4:78859050              | CNOT6L:miR-192         |
| rs4109404  | chr4:78859050              | CNOT6L:miR-215         |
| rs1846913  | chr4:78859055              | CNOT6L:miR-192         |
| rs1846913  | chr4:78859055              | CNOT6L:miR-215         |
| rs1846913  | chr4:78859055              | CNOT6L:miR-486         |
| rs11098228 | chr4:79684002              | FRAS1:miR-381          |

**Supplemental Table 4: SNPs in miRNA target sites based on PITA prediction**

| <b>SNP</b> | <b>SNP Position (hg18)</b> | <b>PITA Prediction</b> |
|------------|----------------------------|------------------------|
| rs17003335 | chr4:79684394              | FRAS1:miR-768-5p       |
| rs58762366 | chr4:80058707              | PAQR3:miR-203          |
| rs7747     | chr4:81046086              | ANTXR2:miR-590         |
| rs28760378 | chr4:81343968              | PRDM8:miR-618          |
| rs35168339 | chr4:82193800              | BMP3:miR-34a           |
| rs35168339 | chr4:82193800              | BMP3:miR-34c           |
| rs35168339 | chr4:82193800              | BMP3:miR-449           |
| rs35168339 | chr4:82193800              | BMP3:miR-449b          |
| rs33951934 | chr4:82197399              | BMP3:miR-656           |
| rs1801067  | chr4:83563465              | HNRPDL:miR-422a        |
| rs4693031  | chr4:83625544              | FLJ12993:miR-125a      |
| rs4693031  | chr4:83625544              | FLJ12993:miR-125b      |
| rs6840     | chr4:83770031              | SCD5:miR-520a*         |
| rs6840     | chr4:83770031              | SCD5:miR-525           |
| rs35490627 | chr4:83771302              | SCD5:miR-495           |
| rs56205403 | chr4:84068004              | DKFZp686L1814:miR-361  |
| rs56205403 | chr4:84068004              | DKFZp686L1814:miR-583  |
| rs1061727  | chr4:85811372              | WDFY3:miR-105          |
| rs1061727  | chr4:85811372              | WDFY3:miR-519e         |
| rs56937789 | chr4:87141163              | ARHGAP24:miR-203       |
| rs60234541 | chr4:87141328              | ARHGAP24:miR-545       |
| rs34636402 | chr4:88280653              | AFF1:miR-380-3p        |
| rs35907994 | chr4:88280669              | AFF1:miR-380-3p        |
| rs56202513 | chr4:88280669              | AFF1:miR-380-3p        |
| rs35907994 | chr4:88280669              | AFF1:miR-380-3p        |
| rs56202513 | chr4:88280669              | AFF1:miR-380-3p        |
| rs3733372  | chr4:88280979              | AFF1:miR-381           |
| rs9138     | chr4:89123366              | SPP1:miR-544           |
| rs2602122  | chr4:89836464              | NAP1L5:miR-222         |
| rs17016074 | chr4:90866301              | SNCA:miR-31            |
| rs35733299 | chr4:90866426              | SNCA:miR-506           |
| rs62320431 | chr4:95430481              | SMARCAD1:miR-320       |
| rs8336     | chr4:95430633              | SMARCAD1:miR-143       |
| rs8336     | chr4:95430633              | SMARCAD1:miR-573       |
| rs36011297 | chr4:100020327             | EIF4E:miR-559          |
| rs1803729  | chr4:101088495             | H2AFZ:miR-9*           |
| rs1047211  | chr4:102164436             | PPP3CA:miR-338         |
| rs1047211  | chr4:102164436             | PPP3CA:miR-770-5p      |
| rs35136542 | chr4:103757301             | NFKB1:miR-450          |
| rs35136542 | chr4:103757301             | NFKB1:miR-129          |
| rs5860728  | chr4:103757302             | NFKB1:miR-450          |
| rs5860728  | chr4:103757302             | NFKB1:miR-129          |
| rs1054495  | chr4:103936461             | UBE2D3:miR-185         |
| rs11558052 | chr4:103937161             | UBE2D3:miR-222         |
| rs34841746 | chr4:106381877             | KIAA1546:miR-561       |
| rs34841746 | chr4:106381877             | KIAA1546:miR-520d*     |
| rs17036408 | chr4:107110147             | NPNT:miR-190           |
| rs28457630 | chr4:107112095             | NPNT:miR-579           |
| rs1802116  | chr4:108754558             | PAPSS1:miR-410         |
| rs1802116  | chr4:108754558             | PAPSS1:miR-194         |
| rs9569     | chr4:108754784             | PAPSS1:miR-421         |
| rs4365796  | chr4:109189332             | LEF1:miR-557           |

**Supplemental Table 4: SNPs in miRNA target sites based on PITA prediction**

| <b>SNP</b> | <b>SNP Position (hg18)</b> | <b>PITA Prediction</b> |
|------------|----------------------------|------------------------|
| rs34730464 | chr4:111703828             | ENPEP:miR-550          |
| rs2739202  | chr4:111758171             | PITX2:miR-539          |
| rs2739201  | chr4:111758173             | PITX2:miR-539          |
| rs58434028 | chr4:111758264             | PITX2:miR-623          |
| rs58434028 | chr4:111758264             | PITX2:miR-502          |
| rs6533526  | chr4:111758276             | PITX2:miR-548c         |
| rs1045940  | chr4:113329151             | FLJ39370:miR-527       |
| rs3733630  | chr4:113416236             | TIFA:miR-186           |
| rs13124509 | chr4:114522474             | ANK2:miR-142-5p        |
| rs55917368 | chr4:114522624             | ANK2:miR-33            |
| rs55917368 | chr4:114522624             | ANK2:miR-586           |
| rs34406850 | chr4:114595045             | CAMK2D:miR-765         |
| rs35790127 | chr4:115042089             | ARSJ:miR-559           |
| rs15128    | chr4:119863575             | SEC24D:miR-144         |
| rs58051836 | chr4:120635327             | PDE5A:miR-202          |
| rs13107938 | chr4:122469857             | GPR103:miR-373*        |
| rs1048201  | chr4:124033758             | FGF2:miR-194           |
| rs3804158  | chr4:124034350             | FGF2:miR-377           |
| rs45441398 | chr4:124036022             | FGF2:miR-410           |
| rs7655413  | chr4:124036978             | FGF2:miR-26a           |
| rs7655413  | chr4:124036978             | FGF2:miR-26b           |
| rs41300351 | chr4:129410761             | PGRMC2:miR-493-5p      |
| rs3816604  | chr4:130014194             | PHF17:miR-141          |
| rs3816604  | chr4:130014194             | PHF17:miR-200a         |
| rs10970    | chr4:134331061             | PCDH10:miR-24          |
| rs1058267  | chr4:134332052             | PCDH10:miR-496         |
| rs11545027 | chr4:141761783             | TBC1D9:miR-431         |
| rs11365088 | chr4:144361236             | USP38:miR-433          |
| rs12501651 | chr4:144361609             | USP38:miR-128a         |
| rs12501651 | chr4:144361609             | USP38:miR-128b         |
| rs17017380 | chr4:144362051             | USP38:miR-802          |
| rs62344037 | chr4:145878648             | HHIP:miR-122a          |
| rs35984115 | chr4:146268771             | ABCE1:miR-506          |
| rs36227325 | chr4:146276336             | OTUD4:miR-520g         |
| rs36227325 | chr4:146276336             | OTUD4:miR-520h         |
| rs36227325 | chr4:146276336             | OTUD4:miR-106a         |
| rs36227325 | chr4:146276336             | OTUD4:miR-106b         |
| rs36227325 | chr4:146276336             | OTUD4:miR-17-5p        |
| rs36227325 | chr4:146276336             | OTUD4:miR-20a          |
| rs36227325 | chr4:146276336             | OTUD4:miR-20b          |
| rs36227325 | chr4:146276336             | OTUD4:miR-302a         |
| rs36227325 | chr4:146276336             | OTUD4:miR-302b         |
| rs36227325 | chr4:146276336             | OTUD4:miR-302c         |
| rs36227325 | chr4:146276336             | OTUD4:miR-302d         |
| rs36227325 | chr4:146276336             | OTUD4:miR-373          |
| rs36227325 | chr4:146276336             | OTUD4:miR-520a         |
| rs36227325 | chr4:146276336             | OTUD4:miR-520b         |
| rs36227325 | chr4:146276336             | OTUD4:miR-520c         |
| rs36227325 | chr4:146276336             | OTUD4:miR-520d         |
| rs36227325 | chr4:146276336             | OTUD4:miR-520e         |
| rs36227325 | chr4:146276336             | OTUD4:miR-526b*        |
| rs1063615  | chr4:146276389             | OTUD4:miR-607          |

**Supplemental Table 4: SNPs in miRNA target sites based on PITA prediction**

| <b>SNP</b> | <b>SNP Position (hg18)</b> | <b>PITA Prediction</b> |
|------------|----------------------------|------------------------|
| rs36227003 | chr4:146277274             | OTUD4:miR-199a         |
| rs36227003 | chr4:146277274             | OTUD4:miR-199b         |
| rs11416    | chr4:146698557             | SMAD1:miR-650          |
| rs11416    | chr4:146698557             | SMAD1:miR-518f*        |
| rs11416    | chr4:146698557             | SMAD1:miR-520a*        |
| rs11416    | chr4:146698557             | SMAD1:miR-525          |
| rs11416    | chr4:146698557             | SMAD1:miR-526a         |
| rs11416    | chr4:146698557             | SMAD1:miR-526c         |
| rs35586342 | chr4:149221047             | NR3C2:miR-25           |
| rs35586342 | chr4:149221047             | NR3C2:miR-367          |
| rs35586342 | chr4:149221047             | NR3C2:miR-92           |
| rs35586342 | chr4:149221047             | NR3C2:miR-92b          |
| rs60709046 | chr4:149221545             | NR3C2:miR-19a          |
| rs60709046 | chr4:149221545             | NR3C2:miR-19b          |
| rs17026780 | chr4:151405888             | LRBA:miR-582           |
| rs4399968  | chr4:153462774             | FBXW7:miR-593          |
| rs4399968  | chr4:153462774             | FBXW7:miR-624          |
| rs4399968  | chr4:153462774             | FBXW7:miR-338          |
| rs55788832 | chr4:153769030             | FLJ32028:miR-578       |
| rs55788832 | chr4:153769030             | FLJ32028:miR-581       |
| rs36107658 | chr4:154051178             | ARFIP1:miR-204         |
| rs36107658 | chr4:154051178             | ARFIP1:miR-211         |
| rs17029398 | chr4:154118006             | KIAA1727:miR-548a      |
| rs17029398 | chr4:154118006             | KIAA1727:miR-9*        |
| rs1062835  | chr4:154478095             | TRIM2:miR-432          |
| rs3180908  | chr4:157902757             | PDGFC:miR-767-5p       |
| rs41280451 | chr4:158506304             | GRIA2:miR-643          |
| rs3749464  | chr4:160499182             | RAPGEF2:miR-196a       |
| rs3749464  | chr4:160499182             | RAPGEF2:miR-196b       |
| rs35914540 | chr4:162526061             | FSTL5:miR-522          |
| rs12200    | chr4:166638888             | CPE:miR-130a           |
| rs12200    | chr4:166638888             | CPE:miR-130b           |
| rs12200    | chr4:166638888             | CPE:miR-301            |
| rs12200    | chr4:166638888             | CPE:miR-454-3p         |
| rs57057442 | chr4:170085952             | PALLD:miR-641          |
| rs12509103 | chr4:171144370             | MFAP3L:miR-363*        |
| rs55782822 | chr4:171149045             | MFAP3L:miR-217         |
| rs55782822 | chr4:171149045             | MFAP3L:miR-222         |
| rs1050092  | chr4:175394787             | FBXO8:miR-496          |
| rs45522334 | chr4:175649595             | HPGD:miR-579           |
| rs17061725 | chr4:176791216             | GPM6A:miR-520d*        |
| rs17061725 | chr4:176791216             | GPM6A:miR-330          |
| rs17061725 | chr4:176791216             | GPM6A:miR-518b         |
| rs17061725 | chr4:176791216             | GPM6A:miR-518c         |
| rs17061725 | chr4:176791216             | GPM6A:miR-518d         |
| rs2278903  | chr4:177486527             | SPCS3:miR-569          |
| rs7671657  | chr4:183959166             | ODZ3:miR-548c          |
| rs7672260  | chr4:183959450             | ODZ3:miR-363           |
| rs35670696 | chr4:183960330             | ODZ3:miR-183           |
| rs35670696 | chr4:183960330             | ODZ3:miR-633           |
| rs35670696 | chr4:183960330             | ODZ3:miR-199a*         |
| rs11371540 | chr4:183960771             | ODZ3:miR-593           |

**Supplemental Table 4: SNPs in miRNA target sites based on PITA prediction**

| <b>SNP</b> | <b>SNP Position (hg18)</b> | <b>PITA Prediction</b> |
|------------|----------------------------|------------------------|
| rs11371540 | chr4:183960771             | ODZ3:miR-624           |
| rs11542347 | chr4:183960774             | ODZ3:miR-593           |
| rs11542347 | chr4:183960774             | ODZ3:miR-624           |
| rs62336285 | chr4:183961062             | ODZ3:miR-369-3p        |
| rs3193661  | chr4:184669141             | ING2:miR-568           |
| rs3193659  | chr4:184669151             | ING2:miR-559           |
| rs58025549 | chr4:185545979             | IRF2:miR-595           |
| rs3832301  | chr4:185545980             | IRF2:miR-595           |
| rs61441758 | chr4:185545980             | IRF2:miR-595           |
| rs1803900  | chr4:185914115             | ACSL1:miR-216          |
| rs2292899  | chr4:185915104             | ACSL1:miR-34b          |
| rs2292899  | chr4:185915104             | ACSL1:miR-34a          |
| rs2292899  | chr4:185915104             | ACSL1:miR-34c          |
| rs2292899  | chr4:185915104             | ACSL1:miR-449          |
| rs2292899  | chr4:185915104             | ACSL1:miR-449b         |
| rs2292899  | chr4:185915104             | ACSL1:miR-142-3p       |
| rs6813224  | chr4:186320807             | KIAA1430:miR-802       |
| rs3842594  | chr4:186744223             | SORBS2:miR-549         |
| rs33967166 | chr4:186744224             | SORBS2:miR-549         |
| rs3172664  | chr4:186744970             | SORBS2:miR-126*        |
| rs35072060 | chr4:187746058             | FAT:miR-140            |
| rs11542880 | chr4:187746147             | FAT:miR-551b           |
| rs60826175 | chr5:713344                | TPPP:miR-568           |
| rs3830370  | chr5:1930639               | IRX4:miR-122a          |
| rs1043196  | chr5:5543270               | KIAA0947:miR-208       |
| rs28381437 | chr5:6809157               | POLS:miR-448           |
| rs9332     | chr5:7953712               | MTRR:miR-361           |
| rs61752751 | chr5:11025711              | CTNND2:miR-548c        |
| rs1044405  | chr5:16526310              | FLJ20152:miR-484       |
| rs32147    | chr5:16527644              | FLJ20152:miR-32        |
| rs1393229  | chr5:17329645              | BASP1:miR-613          |
| rs1393228  | chr5:17329647              | BASP1:miR-613          |
| rs1393227  | chr5:17329674              | BASP1:miR-539          |
| rs3832327  | chr5:32144445              | PDZD2:miR-600          |
| rs33977079 | chr5:32144446              | PDZD2:miR-600          |
| rs3062060  | chr5:32144450              | PDZD2:miR-600          |
| rs55693155 | chr5:32391034              | ZFR:miR-105            |
| rs15075    | chr5:32637131              | SUB1:miR-563           |
| rs14966    | chr5:34990840              | DNAJA5:miR-30a-5p      |
| rs14966    | chr5:34990840              | DNAJA5:miR-30b         |
| rs14966    | chr5:34990840              | DNAJA5:miR-30c         |
| rs14966    | chr5:34990840              | DNAJA5:miR-30d         |
| rs14966    | chr5:34990840              | DNAJA5:miR-30e-5p      |
| rs2269273  | chr5:36723855              | SLC1A3:miR-568         |
| rs34031034 | chr5:37100871              | NIPBL:miR-544          |
| rs10315    | chr5:38974100              | RICTOR:miR-577         |
| rs36033427 | chr5:38974719              | RICTOR:miR-203         |
| rs36033427 | chr5:38974719              | RICTOR:miR-613         |
| rs45622440 | chr5:38974721              | RICTOR:miR-203         |
| rs45622440 | chr5:38974721              | RICTOR:miR-613         |
| rs16867891 | chr5:38976307              | RICTOR:miR-518c*       |
| rs2163299  | chr5:38977464              | RICTOR:miR-548b        |



**Supplemental Table 4: SNPs in miRNA target sites based on PITA prediction**

| <b>SNP</b> | <b>SNP Position (hg18)</b> | <b>PITA Prediction</b> |
|------------|----------------------------|------------------------|
| rs2163299  | chr5:38977464              | RICTOR:miR-548c        |
| rs56362760 | chr5:39407562              | DAB2:miR-573           |
| rs2738242  | chr5:39407619              | DAB2:miR-568           |
| rs2542708  | chr5:39407668              | DAB2:miR-522           |
| rs2542709  | chr5:39407743              | DAB2:miR-134           |
| rs34292915 | chr5:41344942              | PLCXD3:miR-651         |
| rs36055260 | chr5:41345864              | PLCXD3:miR-630         |
| rs45458097 | chr5:42755538              | GHR:miR-208            |
| rs11369980 | chr5:42755825              | GHR:miR-548c           |
| rs33932726 | chr5:42755826              | GHR:miR-548c           |
| rs34239256 | chr5:42835812              | SEPP1:miR-633          |
| rs28919927 | chr5:42835814              | SEPP1:miR-633          |
| rs41268421 | chr5:50725740              | ISL1:miR-188           |
| rs2233213  | chr5:52433762              | MOCS2:miR-561          |
| rs567      | chr5:53014854              | NDUFS4:miR-32          |
| rs34170674 | chr5:53876639              | SNAG1:miR-185          |
| rs10033    | chr5:54756680              | PPAP2A:miR-503         |
| rs4084822  | chr5:55272985              | IL6ST:miR-372          |
| rs4084822  | chr5:55272985              | IL6ST:miR-93           |
| rs4084822  | chr5:55272985              | IL6ST:miR-512-3p       |
| rs702688   | chr5:56226743              | MAP3K1:miR-576         |
| rs7711525  | chr5:56226950              | MAP3K1:miR-559         |
| rs10045390 | chr5:56253098              | MIER3:miR-30a-5p       |
| rs10045390 | chr5:56253098              | MIER3:miR-30b          |
| rs10045390 | chr5:56253098              | MIER3:miR-30c          |
| rs10045390 | chr5:56253098              | MIER3:miR-30d          |
| rs10045390 | chr5:56253098              | MIER3:miR-30e-5p       |
| rs1043020  | chr5:57785672              | PLK2:miR-561           |
| rs15009    | chr5:57786107              | PLK2:miR-516-3p        |
| rs4647102  | chr5:60235120              | ERCC8:miR-634          |
| rs34439084 | chr5:61717353              | KIF2A:miR-216          |
| rs34018584 | chr5:61717685              | KIF2A:miR-1            |
| rs34018584 | chr5:61717685              | KIF2A:miR-206          |
| rs16892964 | chr5:63943020              | R7BP:miR-580           |
| rs7705258  | chr5:64350127              | SDCCAG10:miR-182       |
| rs2166388  | chr5:65154905              | NLN:miR-579            |
| rs2166389  | chr5:65154906              | NLN:miR-579            |
| rs16894862 | chr5:65410275              | ERBB2IP:miR-140        |
| rs10471668 | chr5:65410797              | ERBB2IP:miR-511        |
| rs56286990 | chr5:65411351              | ERBB2IP:miR-518c*      |
| rs56242459 | chr5:65411819              | ERBB2IP:miR-189        |
| rs34416301 | chr5:65411822              | ERBB2IP:miR-189        |
| rs34416301 | chr5:65411822              | ERBB2IP:miR-512-3p     |
| rs55996357 | chr5:65411943              | ERBB2IP:miR-561        |
| rs60627043 | chr5:65510861              | SFRS12:miR-577         |
| rs3846482  | chr5:65510996              | SFRS12:miR-199a*       |
| rs5868531  | chr5:67629989              | PIK3R1:miR-512-3p      |
| rs5868531  | chr5:67629989              | PIK3R1:miR-153         |
| rs5868532  | chr5:67632926              | PIK3R1:miR-103         |
| rs5868532  | chr5:67632926              | PIK3R1:miR-107         |
| rs34873643 | chr5:67632927              | PIK3R1:miR-103         |
| rs34873643 | chr5:67632927              | PIK3R1:miR-107         |

**Supplemental Table 4: SNPs in miRNA target sites based on PITA prediction**

| <b>SNP</b> | <b>SNP Position (hg18)</b> | <b>PITA Prediction</b> |
|------------|----------------------------|------------------------|
| rs58068754 | chr5:71540049              | MAP1B:miR-580          |
| rs11551257 | chr5:71540121              | MAP1B:miR-452*         |
| rs3191502  | chr5:71540920              | MAP1B:miR-589          |
| rs34653826 | chr5:72241623              | TNPO1:miR-203          |
| rs35984748 | chr5:72244467              | TNPO1:miR-331          |
| rs12518829 | chr5:72420018              | FCHO2:miR-636          |
| rs12518829 | chr5:72420018              | FCHO2:miR-218          |
| rs60533722 | chr5:72883969              | ANKRA2:miR-23a         |
| rs60533722 | chr5:72883969              | ANKRA2:miR-23b         |
| rs35436905 | chr5:74692553              | HMGCR:miR-655          |
| rs6864605  | chr5:77334291              | AP3B1:miR-559          |
| rs11552314 | chr5:77334375              | AP3B1:miR-630          |
| rs6870027  | chr5:77810312              | SCAMP1:miR-548c        |
| rs11558670 | chr5:77816981              | LHFPL2:miR-659         |
| rs11432990 | chr5:77817823              | LHFPL2:miR-186         |
| rs3087813  | chr5:79017306              | PAPD4:miR-562          |
| rs1055189  | chr5:79314887              | MTX3:miR-569           |
| rs1802976  | chr5:79809451              | ZFYVE16:miR-154        |
| rs9641     | chr5:80751669              | SSBP2:miR-203          |
| rs17206014 | chr5:82912040              | CSPG2:miR-573          |
| rs10474257 | chr5:86722661              | RASA1:miR-19a          |
| rs10474257 | chr5:86722661              | RASA1:miR-19b          |
| rs1803616  | chr5:86722964              | RASA1:miR-518c*        |
| rs62368952 | chr5:86723405              | RASA1:miR-582          |
| rs56660854 | chr5:88054157              | MEF2C:miR-548a         |
| rs56660854 | chr5:88054157              | MEF2C:miR-9*           |
| rs35930204 | chr5:89725390              | CETN3:miR-154*         |
| rs35930204 | chr5:89725390              | CETN3:miR-487a         |
| rs2033261  | chr5:89789858              | LOC153364:miR-181b     |
| rs2033261  | chr5:89789858              | LOC153364:miR-181d     |
| rs13355867 | chr5:89791858              | LOC153364:miR-494      |
| rs13355867 | chr5:89791858              | LOC153364:miR-641      |
| rs13355867 | chr5:89791858              | LOC153364:miR-410      |
| rs13355867 | chr5:89791858              | LOC153364:miR-369-3p   |
| rs34017289 | chr5:89792196              | LOC153364:miR-381      |
| rs34017289 | chr5:89792196              | LOC153364:miR-524*     |
| rs11557537 | chr5:95157675              | RHOBTB3:miR-106a       |
| rs11557537 | chr5:95157675              | RHOBTB3:miR-106b       |
| rs11557537 | chr5:95157675              | RHOBTB3:miR-17-5p      |
| rs11557537 | chr5:95157675              | RHOBTB3:miR-20a        |
| rs11557537 | chr5:95157675              | RHOBTB3:miR-20b        |
| rs11557537 | chr5:95157675              | RHOBTB3:miR-142-5p     |
| rs11557537 | chr5:95157675              | RHOBTB3:miR-559        |
| rs11557537 | chr5:95157675              | RHOBTB3:miR-142-5p     |
| rs35457589 | chr5:95246914              | ELL2:miR-635           |
| rs35630308 | chr5:95249197              | ELL2:miR-548c          |
| rs2348979  | chr5:95249642              | ELL2:miR-650           |
| rs2348979  | chr5:95249642              | ELL2:miR-34b           |
| rs2348979  | chr5:95249642              | ELL2:miR-34a           |
| rs2348979  | chr5:95249642              | ELL2:miR-34c           |
| rs2348979  | chr5:95249642              | ELL2:miR-449           |
| rs2348979  | chr5:95249642              | ELL2:miR-449b          |

**Supplemental Table 4: SNPs in miRNA target sites based on PITA prediction**

| <b>SNP</b> | <b>SNP Position (hg18)</b> | <b>PITA Prediction</b> |
|------------|----------------------------|------------------------|
| rs2348980  | chr5:95249654              | ELL2:miR-569           |
| rs28118    | chr5:96134594              | CAST:miR-30a-5p        |
| rs28118    | chr5:96134594              | CAST:miR-30b           |
| rs28118    | chr5:96134594              | CAST:miR-30c           |
| rs28118    | chr5:96134594              | CAST:miR-30d           |
| rs28118    | chr5:96134594              | CAST:miR-30e-5p        |
| rs2455425  | chr5:98219636              | CHD1:miR-30a-5p        |
| rs2455425  | chr5:98219636              | CHD1:miR-30b           |
| rs2455425  | chr5:98219636              | CHD1:miR-30c           |
| rs2455425  | chr5:98219636              | CHD1:miR-30d           |
| rs2455425  | chr5:98219636              | CHD1:miR-30e-5p        |
| rs3086314  | chr5:99949884              | UNQ1912:miR-365        |
| rs17779334 | chr5:100171748             | ST8SIA4:miR-565        |
| rs5869926  | chr5:100174922             | ST8SIA4:miR-577        |
| rs33919201 | chr5:100174923             | ST8SIA4:miR-577        |
| rs10075853 | chr5:100175108             | ST8SIA4:miR-218        |
| rs3209752  | chr5:102393147             | PAM:miR-140            |
| rs8488     | chr5:102566651             | HISPPD1:miR-181b       |
| rs8488     | chr5:102566651             | HISPPD1:miR-181d       |
| rs17297682 | chr5:102566693             | HISPPD1:miR-181a       |
| rs17297682 | chr5:102566693             | HISPPD1:miR-181c       |
| rs6887316  | chr5:108699607             | PJA2:miR-580           |
| rs56059589 | chr5:109230778             | MAN2A1:miR-135a        |
| rs56059589 | chr5:109230778             | MAN2A1:miR-135b        |
| rs17839485 | chr5:111093245             | C5orf13:miR-583        |
| rs1056131  | chr5:111093663             | C5orf13:miR-604        |
| rs1804197  | chr5:112207808             | APC:miR-30a-3p         |
| rs1804197  | chr5:112207808             | APC:miR-30e-3p         |
| rs6875894  | chr5:112207864             | APC:miR-135a           |
| rs6875894  | chr5:112207864             | APC:miR-135b           |
| rs6875894  | chr5:112207864             | APC:miR-584            |
| rs34867143 | chr5:112208091             | APC:miR-223            |
| rs11432316 | chr5:112208127             | APC:miR-568            |
| rs11432316 | chr5:112208127             | APC:miR-129            |
| rs34829795 | chr5:112208128             | APC:miR-568            |
| rs34829795 | chr5:112208128             | APC:miR-129            |
| rs12189    | chr5:112208156             | APC:miR-422a           |
| rs11373376 | chr5:112208382             | APC:miR-582            |
| rs3984997  | chr5:114886725             | FEM1C:miR-202          |
| rs3984998  | chr5:114886729             | FEM1C:miR-202          |
| rs3776801  | chr5:114887552             | FEM1C:miR-568          |
| rs34109965 | chr5:114977340             | TMED7:miR-30a-3p       |
| rs34109965 | chr5:114977340             | TMED7:miR-30e-3p       |
| rs11550719 | chr5:114977481             | TMED7:miR-582          |
| rs9637898  | chr5:114979755             | TMED7:miR-768-5p       |
| rs6895938  | chr5:115277497             | AP3S1:miR-488          |
| rs6895938  | chr5:115277497             | AP3S1:miR-515-5p       |
| rs6895938  | chr5:115277497             | AP3S1:miR-519e*        |
| rs6895941  | chr5:115277498             | AP3S1:miR-488          |
| rs6895941  | chr5:115277498             | AP3S1:miR-515-5p       |
| rs6895941  | chr5:115277498             | AP3S1:miR-519e*        |
| rs7712615  | chr5:115808863             | SEMA6A:miR-376a        |

**Supplemental Table 4: SNPs in miRNA target sites based on PITA prediction**

| <b>SNP</b> | <b>SNP Position (hg18)</b> | <b>PITA Prediction</b> |
|------------|----------------------------|------------------------|
| rs7712615  | chr5:115808863             | SEMA6A:miR-376b        |
| rs35380761 | chr5:120050693             | LOC51334:miR-628       |
| rs10558436 | chr5:122193370             | SNX2:miR-568           |
| rs11952411 | chr5:122979574             | CSNK1G3:miR-628        |
| rs57925933 | chr5:124000697             | ZNF608:miR-508         |
| rs33927774 | chr5:124000698             | ZNF608:miR-508         |
| rs12657182 | chr5:124000922             | ZNF608:miR-553         |
| rs56071397 | chr5:126233486             | MARCH3:miR-562         |
| rs17164927 | chr5:126821842             | MEGF10:miR-452         |
| rs3087889  | chr5:127552843             | SLC12A2:miR-186        |
| rs12520897 | chr5:129550171             | CSS3:miR-657           |
| rs3211171  | chr5:130756160             | CDC42SE2:miR-532       |
| rs11557375 | chr5:131317645             | ACSL6:miR-559          |
| rs11557375 | chr5:131317645             | ACSL6:miR-577          |
| rs11557375 | chr5:131317645             | ACSL6:miR-142-5p       |
| rs847      | chr5:132024568             | IL13:miR-381           |
| rs42403    | chr5:132121893             | SEPT8:miR-138          |
| rs2286012  | chr5:132122196             | SEPT8:miR-135a         |
| rs2286012  | chr5:132122196             | SEPT8:miR-135b         |
| rs14355    | chr5:132468184             | HSPA4:miR-106a         |
| rs14355    | chr5:132468184             | HSPA4:miR-106b         |
| rs14355    | chr5:132468184             | HSPA4:miR-17-5p        |
| rs14355    | chr5:132468184             | HSPA4:miR-20a          |
| rs14355    | chr5:132468184             | HSPA4:miR-20b          |
| rs14355    | chr5:132468184             | HSPA4:miR-580          |
| rs34654406 | chr5:133521155             | SKP1A:miR-769-3p       |
| rs3209711  | chr5:133560686             | PPP2CA:miR-659         |
| rs34880639 | chr5:133755105             | UBE2B:miR-643          |
| rs62379978 | chr5:133943868             | PHF15:miR-21           |
| rs62379978 | chr5:133943868             | PHF15:miR-28           |
| rs329327   | chr5:133946805             | PHF15:miR-141          |
| rs329327   | chr5:133946805             | PHF15:miR-200a         |
| rs329327   | chr5:133946805             | PHF15:miR-200b         |
| rs329327   | chr5:133946805             | PHF15:miR-200c         |
| rs10479083 | chr5:133970377             | SAR1B:miR-223          |
| rs6884245  | chr5:134090940             | SEC24A:miR-22          |
| rs1049478  | chr5:134698296             | H2AFY:miR-559          |
| rs1049478  | chr5:134698296             | H2AFY:miR-577          |
| rs3813315  | chr5:136982760             | KLHL3:miR-32           |
| rs11739162 | chr5:137116133             | HNRPA0:miR-302c*       |
| rs10070991 | chr5:137304031             | PKD2L2:miR-581         |
| rs10070991 | chr5:137304031             | PKD2L2:miR-422a        |
| rs3798151  | chr5:137799396             | JMJD1B:miR-565         |
| rs3087736  | chr5:137871320             | ETF1:miR-106a          |
| rs3087736  | chr5:137871320             | ETF1:miR-106b          |
| rs3087736  | chr5:137871320             | ETF1:miR-17-5p         |
| rs3087736  | chr5:137871320             | ETF1:miR-20a           |
| rs3087736  | chr5:137871320             | ETF1:miR-20b           |
| rs3087736  | chr5:137871320             | ETF1:miR-519d          |
| rs3087736  | chr5:137871320             | ETF1:miR-302a          |
| rs3087736  | chr5:137871320             | ETF1:miR-302b          |
| rs3087736  | chr5:137871320             | ETF1:miR-302c          |

**Supplemental Table 4: SNPs in miRNA target sites based on PITA prediction**

| <b>SNP</b> | <b>SNP Position (hg18)</b> | <b>PITA Prediction</b> |
|------------|----------------------------|------------------------|
| rs3087736  | chr5:137871320             | ETF1:miR-302d          |
| rs3087736  | chr5:137871320             | ETF1:miR-373           |
| rs3087736  | chr5:137871320             | ETF1:miR-519e          |
| rs3087736  | chr5:137871320             | ETF1:miR-520a          |
| rs3087736  | chr5:137871320             | ETF1:miR-520b          |
| rs3087736  | chr5:137871320             | ETF1:miR-520c          |
| rs3087736  | chr5:137871320             | ETF1:miR-520d          |
| rs3087736  | chr5:137871320             | ETF1:miR-520e          |
| rs3087736  | chr5:137871320             | ETF1:miR-526b*         |
| rs3087736  | chr5:137871320             | ETF1:miR-515-3p        |
| rs3087736  | chr5:137871320             | ETF1:miR-520f          |
| rs17031    | chr5:138298441             | CTNNA1:miR-141         |
| rs17031    | chr5:138298441             | CTNNA1:miR-200a        |
| rs55932698 | chr5:138693095             | MATR3:miR-653          |
| rs1801867  | chr5:138693761             | MATR3:miR-521          |
| rs5871723  | chr5:139476360             | PURA:miR-593           |
| rs5871723  | chr5:139476360             | PURA:miR-768-5p        |
| rs12656477 | chr5:139693764             | HBEGF:miR-640          |
| rs12656477 | chr5:139693764             | HBEGF:miR-520a*        |
| rs12656477 | chr5:139693764             | HBEGF:miR-525          |
| rs155360   | chr5:140289200             | PCDHAC1:miR-659        |
| rs60692195 | chr5:140371375             | PCDHA10:miR-577        |
| rs14615    | chr5:140372001             | PCDHA8:miR-302c*       |
| rs55798800 | chr5:140875669             | DIAPH1:miR-186         |
| rs14251    | chr5:140999294             | FCHSD1:miR-205         |
| rs4995946  | chr5:141212960             | PCDH1:miR-324-5p       |
| rs10058887 | chr5:142582753             | ARHGAP26:miR-568       |
| rs10482716 | chr5:142637770             | NR3C1:miR-19a          |
| rs10482716 | chr5:142637770             | NR3C1:miR-19b          |
| rs11552272 | chr5:142637822             | NR3C1:miR-559          |
| rs11552272 | chr5:142637822             | NR3C1:miR-577          |
| rs10482714 | chr5:142638097             | NR3C1:miR-521          |
| rs61753507 | chr5:142639265             | NR3C1:miR-561          |
| rs61753504 | chr5:142640471             | NR3C1:miR-542-3p       |
| rs1803634  | chr5:142641231             | NR3C1:miR-378          |
| rs12109284 | chr5:143519978             | YIPF5:miR-648          |
| rs1802025  | chr5:145871061             | TCERG1:miR-140         |
| rs1802024  | chr5:145871085             | TCERG1:miR-142-5p      |
| rs1049378  | chr5:146750676             | DPYSL3:miR-498         |
| rs1049378  | chr5:146750676             | DPYSL3:miR-607         |
| rs36032656 | chr5:147496936             | SPINK5:miR-376a        |
| rs36032656 | chr5:147496936             | SPINK5:miR-376b        |
| rs36032656 | chr5:147496936             | SPINK5:miR-513         |
| rs4987255  | chr5:148188290             | ADRB2:miR-365          |
| rs57308456 | chr5:148728651             | MGC3265:miR-559        |
| rs8221     | chr5:148855800             | CSNK1A1:miR-559        |
| rs8221     | chr5:148855800             | CSNK1A1:miR-577        |
| rs3828609  | chr5:149413056             | CSF1R:miR-512-3p       |
| rs15645    | chr5:149579417             | CAMK2A:miR-653         |
| rs61217791 | chr5:149582417             | CAMK2A:miR-184         |
| rs55954668 | chr5:149914114             | NDST1:miR-656          |
| rs36071594 | chr5:149917689             | NDST1:miR-633          |

**Supplemental Table 4: SNPs in miRNA target sites based on PITA prediction**

| <b>SNP</b> | <b>SNP Position (hg18)</b> | <b>PITA Prediction</b> |
|------------|----------------------------|------------------------|
| rs35295884 | chr5:150627581             | GM2A:miR-542-3p        |
| rs3734045  | chr5:150864065             | FAT2:miR-34b           |
| rs62379673 | chr5:150864488             | FAT2:miR-106a          |
| rs62379673 | chr5:150864488             | FAT2:miR-106b          |
| rs62379673 | chr5:150864488             | FAT2:miR-17-5p         |
| rs62379673 | chr5:150864488             | FAT2:miR-20a           |
| rs62379673 | chr5:150864488             | FAT2:miR-20b           |
| rs62379673 | chr5:150864488             | FAT2:miR-519d          |
| rs62379673 | chr5:150864488             | FAT2:miR-302a          |
| rs62379673 | chr5:150864488             | FAT2:miR-302b          |
| rs62379673 | chr5:150864488             | FAT2:miR-302c          |
| rs62379673 | chr5:150864488             | FAT2:miR-302d          |
| rs62379673 | chr5:150864488             | FAT2:miR-373           |
| rs62379673 | chr5:150864488             | FAT2:miR-519e          |
| rs62379673 | chr5:150864488             | FAT2:miR-520a          |
| rs62379673 | chr5:150864488             | FAT2:miR-520b          |
| rs62379673 | chr5:150864488             | FAT2:miR-520c          |
| rs62379673 | chr5:150864488             | FAT2:miR-520d          |
| rs62379673 | chr5:150864488             | FAT2:miR-520e          |
| rs62379673 | chr5:150864488             | FAT2:miR-526b*         |
| rs1059829  | chr5:151022222             | SPARC:miR-768-5p       |
| rs707178   | chr5:153351598             | C5orf3:miR-548d        |
| rs707178   | chr5:153351598             | C5orf3:miR-520d*       |
| rs11551505 | chr5:154174613             | LARP1:miR-136          |
| rs33954943 | chr5:156752794             | CYFIP2:miR-579         |
| rs57848878 | chr5:156834181             | ICHTHYIN:miR-181b      |
| rs57848878 | chr5:156834181             | ICHTHYIN:miR-181d      |
| rs3836882  | chr5:157145968             | ENTH:miR-410           |
| rs12284    | chr5:157146765             | ENTH:miR-548a          |
| rs1276707  | chr5:158058063             | EBF:miR-369-3p         |
| rs1276707  | chr5:158058063             | EBF:miR-524*           |
| rs11555239 | chr5:158517068             | FLJ31951:miR-559       |
| rs11555239 | chr5:158517068             | FLJ31951:miR-577       |
| rs11555239 | chr5:158517068             | FLJ31951:miR-142-5p    |
| rs11555239 | chr5:158517068             | FLJ31951:miR-559       |
| rs11555238 | chr5:158517073             | FLJ31951:miR-142-5p    |
| rs11555238 | chr5:158517073             | FLJ31951:miR-559       |
| rs60279557 | chr5:160649397             | GABRB2:miR-644         |
| rs55798116 | chr5:160649399             | GABRB2:miR-644         |
| rs153294   | chr5:160650248             | GABRB2:miR-493-5p      |
| rs34906738 | chr5:160653455             | GABRB2:miR-581         |
| rs998754   | chr5:161258512             | GABRA1:miR-153         |
| rs998754   | chr5:161258512             | GABRA1:miR-496         |
| rs7443935  | chr5:167622845             | ODZ2:miR-196a          |
| rs7443935  | chr5:167622845             | ODZ2:miR-196b          |
| rs7443935  | chr5:167622845             | ODZ2:let-7a            |
| rs7443935  | chr5:167622845             | ODZ2:let-7b            |
| rs7443935  | chr5:167622845             | ODZ2:let-7c            |
| rs7443935  | chr5:167622845             | ODZ2:let-7d            |
| rs7443935  | chr5:167622845             | ODZ2:let-7f            |
| rs7443935  | chr5:167622845             | ODZ2:let-7g            |
| rs7443935  | chr5:167622845             | ODZ2:let-7i            |

**Supplemental Table 4: SNPs in miRNA target sites based on PITA prediction**

| <b>SNP</b> | <b>SNP Position (hg18)</b> | <b>PITA Prediction</b> |
|------------|----------------------------|------------------------|
| rs7443935  | chr5:167622845             | ODZ2:miR-98            |
| rs2305737  | chr5:167878839             | RARS:miR-508           |
| rs34975648 | chr5:170095676             | KCNIP1:miR-658         |
| rs6859650  | chr5:170770263             | NPM1:miR-33            |
| rs6859650  | chr5:170770263             | NPM1:miR-544           |
| rs34486870 | chr5:171221591             | FBXW11:miR-623         |
| rs35951290 | chr5:171693162             | SH3PXD2B:miR-583       |
| rs35951290 | chr5:171693162             | SH3PXD2B:miR-185       |
| rs35661076 | chr5:171696199             | SH3PXD2B:miR-96        |
| rs34412722 | chr5:172127738             | DUSP1:miR-568          |
| rs11539173 | chr5:172394447             | ATP6V0E:miR-539        |
| rs15180    | chr5:172394458             | ATP6V0E:miR-583        |
| rs4849     | chr5:172394490             | ATP6V0E:miR-625        |
| rs4849     | chr5:172394490             | ATP6V0E:miR-765        |
| rs8367     | chr5:172394497             | ATP6V0E:miR-587        |
| rs4857     | chr5:172394498             | ATP6V0E:miR-587        |
| rs60728179 | chr5:172394499             | ATP6V0E:miR-587        |
| rs36011372 | chr5:172495096             | LOC153222:miR-330      |
| rs11749456 | chr5:175869619             | UBXD8:miR-561          |
| rs11749456 | chr5:175869619             | UBXD8:miR-186          |
| rs1128287  | chr5:176661064             | RAB24:miR-153          |
| rs1049880  | chr5:176955648             | TMED9:miR-499          |
| rs13972    | chr5:177570515             | HNRPAB:miR-604         |
| rs36119714 | chr5:178973967             | HNRPH1:miR-561         |
| rs1802906  | chr5:178973977             | HNRPH1:miR-455         |
| rs3205295  | chr5:179089818             | CANX:miR-141           |
| rs3205295  | chr5:179089818             | CANX:miR-200a          |
| rs3205295  | chr5:179089818             | CANX:miR-429           |
| rs14801    | chr5:179196851             | SQSTM1:miR-372         |
| rs14801    | chr5:179196851             | SQSTM1:miR-93          |
| rs14801    | chr5:179196851             | SQSTM1:miR-106a        |
| rs14801    | chr5:179196851             | SQSTM1:miR-106b        |
| rs14801    | chr5:179196851             | SQSTM1:miR-17-5p       |
| rs14801    | chr5:179196851             | SQSTM1:miR-20a         |
| rs14801    | chr5:179196851             | SQSTM1:miR-20b         |
| rs10169    | chr5:179315149             | RNF130:miR-559         |
| rs10169    | chr5:179315149             | RNF130:miR-577         |
| rs10169    | chr5:179315149             | RNF130:miR-203         |
| rs14736    | chr5:179595512             | MAPK9:miR-655          |
| rs1803841  | chr5:179595622             | MAPK9:miR-520g         |
| rs1803841  | chr5:179595622             | MAPK9:miR-520h         |
| rs1803841  | chr5:179595622             | MAPK9:miR-106a         |
| rs1803841  | chr5:179595622             | MAPK9:miR-106b         |
| rs1803841  | chr5:179595622             | MAPK9:miR-17-5p        |
| rs1803841  | chr5:179595622             | MAPK9:miR-20a          |
| rs1803841  | chr5:179595622             | MAPK9:miR-20b          |
| rs59738929 | chr5:179660934             | GFPT2:miR-133a         |
| rs59738929 | chr5:179660934             | GFPT2:miR-133b         |
| rs35324011 | chr5:179934027             | CNOT6:miR-19a          |
| rs35324011 | chr5:179934027             | CNOT6:miR-19b          |
| rs57315483 | chr5:179935027             | CNOT6:miR-186          |
| rs34524755 | chr5:179935455             | CNOT6:miR-382          |

**Supplemental Table 4: SNPs in miRNA target sites based on PITA prediction**

| <b>SNP</b> | <b>SNP Position (hg18)</b> | <b>PITA Prediction</b> |
|------------|----------------------------|------------------------|
| rs17080395 | chr5:179937869             | CNOT6:miR-202          |
| rs9387     | chr5:180150232             | MGAT1:miR-548c         |
| rs9918205  | chr5:180343177             | LOC646227:miR-557      |
| rs1064329  | chr6:1259884               | FOXQ1:miR-577          |
| rs1064329  | chr6:1259884               | FOXQ1:miR-559          |
| rs5873799  | chr6:1340805               | FOXF2:miR-186          |
| rs62390613 | chr6:1557650               | FOXC1:miR-516-5p       |
| rs62390613 | chr6:1557650               | TRIM39:miR-134         |
| rs34953829 | chr6:4008180               | PRPF4B:miR-30a-5p      |
| rs34953829 | chr6:4008180               | PRPF4B:miR-30b         |
| rs34953829 | chr6:4008180               | PRPF4B:miR-30c         |
| rs34953829 | chr6:4008180               | PRPF4B:miR-30d         |
| rs34953829 | chr6:4008180               | PRPF4B:miR-30e-5p      |
| rs593291   | chr6:4013715               | C6orf146:miR-527       |
| rs55682129 | chr6:4899709               | CDYL:miR-365           |
| rs28618179 | chr6:5944107               | NRN1:miR-376a          |
| rs28618179 | chr6:5944107               | NRN1:miR-376b          |
| rs28618179 | chr6:5944107               | NRN1:miR-513           |
| rs34270368 | chr6:6090235               | F13A1:miR-130a         |
| rs34270368 | chr6:6090235               | F13A1:miR-130b         |
| rs34270368 | chr6:6090235               | F13A1:miR-301          |
| rs34270368 | chr6:6090235               | F13A1:miR-454-3p       |
| rs41302873 | chr6:7232927               | SSR1:miR-494           |
| rs41302873 | chr6:7232927               | SSR1:miR-641           |
| rs2748376  | chr6:7960128               | MUTED:miR-508          |
| rs16893358 | chr6:10505012              | TFAP2A:miR-586         |
| rs2857061  | chr6:10505112              | TFAP2A:miR-625         |
| rs2763168  | chr6:10505113              | TFAP2A:miR-625         |
| rs2857060  | chr6:10505546              | TFAP2A:miR-142-5p      |
| rs2857060  | chr6:10505546              | TFAP2A:miR-559         |
| rs2857059  | chr6:10505548              | TFAP2A:miR-559         |
| rs1045385  | chr6:10506102              | TFAP2A:miR-768-3p      |
| rs1045385  | chr6:10506102              | TFAP2A:miR-101         |
| rs8523     | chr6:11089039              | ELOVL2:miR-583         |
| rs8523     | chr6:11089039              | ELOVL2:miR-522         |
| rs843973   | chr6:11686222              | LOC100113407:miR-581   |
| rs843973   | chr6:11686222              | LOC100113407:miR-578   |
| rs12191269 | chr6:11687764              | LOC100113407:miR-384   |
| rs35291024 | chr6:11691411              | LOC100113407:miR-448   |
| rs35188801 | chr6:12272937              | HIVEP1:miR-380-3p      |
| rs41267692 | chr6:14087901              | RNF182:miR-600         |
| rs41267692 | chr6:14087901              | RNF182:miR-548b        |
| rs41267692 | chr6:14087901              | RNF182:miR-548c        |
| rs11554819 | chr6:15629247              | JARID2:miR-562         |
| rs11554819 | chr6:15629247              | JARID2:miR-142-5p      |
| rs12202423 | chr6:16256143              | MYLIP:miR-154          |
| rs2205794  | chr6:16256155              | MYLIP:miR-500          |
| rs11552211 | chr6:16256341              | MYLIP:miR-432          |
| rs1049189  | chr6:16410068              | ATXN1:miR-335          |
| rs56071504 | chr6:16413482              | ATXN1:miR-769-3p       |
| rs1061550  | chr6:17401049              | RBM24:miR-552          |
| rs1802808  | chr6:19947788              | ID4:miR-589            |



**Supplemental Table 4: SNPs in miRNA target sites based on PITA prediction**

| <b>SNP</b> | <b>SNP Position (hg18)</b> | <b>PITA Prediction</b> |
|------------|----------------------------|------------------------|
| rs3798340  | chr6:19948651              | ID4:miR-768-5p         |
| rs56364223 | chr6:20598705              | E2F3:miR-542-3p        |
| rs35225726 | chr6:20600933              | E2F3:miR-499           |
| rs11556729 | chr6:21706703              | SOX4:miR-629           |
| rs35505782 | chr6:24813281              | C6orf62:miR-185        |
| rs10946721 | chr6:24813290              | C6orf62:miR-548b       |
| rs10946721 | chr6:24813290              | C6orf62:miR-548c       |
| rs59735047 | chr6:24813293              | C6orf62:miR-548b       |
| rs59735047 | chr6:24813293              | C6orf62:miR-548c       |
| rs3752420  | chr6:26135114              | HIST1H4B:miR-125a      |
| rs3752420  | chr6:26135114              | HIST1H4B:miR-125b      |
| rs41266799 | chr6:26266814              | HIST1H2BD:miR-644      |
| rs34270246 | chr6:26742821              | ZNF322A:miR-766        |
| rs34270246 | chr6:26742821              | ZNF322A:miR-216        |
| rs13214818 | chr6:33528265              | SYNGAP1:miR-594        |
| rs34678276 | chr6:34097833              | GRM4:miR-513           |
| rs35264293 | chr6:34364302              | NUDT3:miR-329          |
| rs34206704 | chr6:35325306              | SCUBE3:miR-576         |
| rs41270060 | chr6:35325587              | SCUBE3:miR-519a        |
| rs41270060 | chr6:35325587              | SCUBE3:miR-519b        |
| rs41270060 | chr6:35325587              | SCUBE3:miR-519c        |
| rs1051950  | chr6:35573788              | TULP1:miR-134          |
| rs3748045  | chr6:36306555              | BRPF3:miR-214          |
| rs1046578  | chr6:37003813              | C6orf89:miR-96         |
| rs34646865 | chr6:37249995              | PIM1:miR-769-3p        |
| rs60693654 | chr6:37407079              | TBC1D22B:miR-608       |
| rs3734329  | chr6:37407091              | TBC1D22B:miR-520a*     |
| rs3734329  | chr6:37407091              | TBC1D22B:miR-525       |
| rs3734329  | chr6:37407091              | TBC1D22B:miR-198       |
| rs57137575 | chr6:37407402              | TBC1D22B:miR-565       |
| rs1043630  | chr6:38230341              | ZFAND3:miR-185         |
| rs34732653 | chr6:43087290              | PPP2R5D:miR-196a       |
| rs34732653 | chr6:43087290              | PPP2R5D:miR-196b       |
| rs41274908 | chr6:43087299              | PPP2R5D:miR-452*       |
| rs1054384  | chr6:43087976              | PPP2R5D:miR-491        |
| rs11552141 | chr6:43237406              | PTK7:miR-503           |
| rs41275946 | chr6:43362801              | TTBK1:miR-452          |
| rs13211310 | chr6:43362806              | TTBK1:miR-452          |
| rs2841654  | chr6:43363071              | TTBK1:miR-484          |
| rs9462887  | chr6:43411983              | ZNF318:miR-452*        |
| rs9462887  | chr6:43411983              | ZNF318:miR-216         |
| rs7692     | chr6:43411985              | ZNF318:miR-452*        |
| rs7692     | chr6:43411985              | ZNF318:miR-216         |
| rs6911354  | chr6:43412050              | ZNF318:miR-381         |
| rs1063511  | chr6:44329542              | HSP90AB1:miR-559       |
| rs590091   | chr6:45623835              | RUNX2:miR-570          |
| rs7451304  | chr6:45625609              | RUNX2:miR-302a         |
| rs7451304  | chr6:45625609              | RUNX2:miR-302b         |
| rs7451304  | chr6:45625609              | RUNX2:miR-302c         |
| rs7451304  | chr6:45625609              | RUNX2:miR-302d         |
| rs7451304  | chr6:45625609              | RUNX2:miR-373          |
| rs7451304  | chr6:45625609              | RUNX2:miR-520a         |

**Supplemental Table 4: SNPs in miRNA target sites based on PITA prediction**

| <b>SNP</b> | <b>SNP Position (hg18)</b> | <b>PITA Prediction</b> |
|------------|----------------------------|------------------------|
| rs7451304  | chr6:45625609              | RUNX2:miR-520b         |
| rs7451304  | chr6:45625609              | RUNX2:miR-520c         |
| rs7451304  | chr6:45625609              | RUNX2:miR-520d         |
| rs7451304  | chr6:45625609              | RUNX2:miR-520e         |
| rs7451304  | chr6:45625609              | RUNX2:miR-526b*        |
| rs35633395 | chr6:45626509              | RUNX2:miR-580          |
| rs2799354  | chr6:46298336              | DSCR1L1:miR-26a        |
| rs2799354  | chr6:46298336              | DSCR1L1:miR-26b        |
| rs6149561  | chr6:46753726              | SLC25A27:miR-380-3p    |
| rs35023081 | chr6:46753727              | SLC25A27:miR-380-3p    |
| rs36041587 | chr6:47702213              | CD2AP:miR-181b         |
| rs36041587 | chr6:47702213              | CD2AP:miR-181d         |
| rs7769978  | chr6:50923188              | TFAP2B:miR-539         |
| rs62405438 | chr6:50923273              | TFAP2B:miR-132         |
| rs62405438 | chr6:50923273              | TFAP2B:miR-212         |
| rs2784198  | chr6:51588445              | PKHD1:miR-452          |
| rs3207469  | chr6:53240272              | ELOVL5:miR-203         |
| rs41273876 | chr6:53241807              | ELOVL5:miR-569         |
| rs17885545 | chr6:53471206              | GCLC:miR-148b          |
| rs17885545 | chr6:53471206              | GCLC:miR-152           |
| rs6920761  | chr6:53623002              | KLHL31:miR-573         |
| rs41271848 | chr6:56431120              | DST:miR-521            |
| rs41271848 | chr6:56431120              | DST:miR-523            |
| rs2840262  | chr6:57163074              | RAB23:miR-518b         |
| rs2840262  | chr6:57163074              | RAB23:miR-518c         |
| rs2840262  | chr6:57163074              | RAB23:miR-518d         |
| rs9449511  | chr6:62448114              | KHDRBS2:miR-524*       |
| rs2758267  | chr6:64348485              | PTP4A1:miR-768-5p      |
| rs2758267  | chr6:64348485              | PTP4A1:miR-522         |
| rs10561236 | chr6:70975710              | COL19A1:miR-494        |
| rs10561236 | chr6:70975710              | COL19A1:miR-641        |
| rs13820    | chr6:74594427              | CD109:miR-577          |
| rs58540334 | chr6:75850957              | COL12A1:miR-410        |
| rs15616    | chr6:76021362              | TMEM30A:miR-656        |
| rs3215618  | chr6:76484543              | SENP6:miR-31           |
| rs36132527 | chr6:79707051              | PHIP:miR-650           |
| rs1394282  | chr6:80251929              | C6orf152:miR-96        |
| rs60499238 | chr6:80681363              | ELOVL4:miR-32          |
| rs60499238 | chr6:80681363              | ELOVL4:miR-603         |
| rs55808788 | chr6:80681493              | ELOVL4:miR-190         |
| rs41270555 | chr6:80682435              | ELOVL4:miR-634         |
| rs1535421  | chr6:80808825              | TTK:miR-144            |
| rs7453801  | chr6:82512567              | FAM46A:miR-580         |
| rs7453801  | chr6:82512567              | FAM46A:miR-106a        |
| rs7453801  | chr6:82512567              | FAM46A:miR-106b        |
| rs7453801  | chr6:82512567              | FAM46A:miR-17-5p       |
| rs7453801  | chr6:82512567              | FAM46A:miR-20a         |
| rs7453801  | chr6:82512567              | FAM46A:miR-20b         |
| rs41270569 | chr6:82513302              | FAM46A:miR-448         |
| rs13213244 | chr6:84726670              | CYB5R4:miR-144         |
| rs7738931  | chr6:88906444              | CNR1:miR-33            |
| rs34654840 | chr6:89851089              | PNRC1:miR-605          |

**Supplemental Table 4: SNPs in miRNA target sites based on PITA prediction**

| <b>SNP</b> | <b>SNP Position (hg18)</b> | <b>PITA Prediction</b> |
|------------|----------------------------|------------------------|
| rs35888018 | chr6:89864133              | SRrp35:miR-499         |
| rs1045972  | chr6:89930894              | ACY1L2:miR-578         |
| rs1045974  | chr6:89930907              | ACY1L2:miR-132         |
| rs1045974  | chr6:89930907              | ACY1L2:miR-212         |
| rs1045988  | chr6:89931003              | ACY1L2:miR-488         |
| rs1045992  | chr6:89931016              | ACY1L2:miR-499         |
| rs1045995  | chr6:89931031              | ACY1L2:miR-656         |
| rs1045999  | chr6:89931053              | ACY1L2:miR-584         |
| rs1046001  | chr6:89931074              | ACY1L2:miR-384         |
| rs59902144 | chr6:90402184              | LYRM2:miR-515-3p       |
| rs59902144 | chr6:90402184              | LYRM2:miR-432          |
| rs58265329 | chr6:90693358              | BACH2:miR-582          |
| rs17513276 | chr6:90694146              | BACH2:miR-586          |
| rs3798790  | chr6:90694225              | BACH2:miR-142-3p       |
| rs62417360 | chr6:90694321              | BACH2:miR-190          |
| rs58132930 | chr6:94009409              | EPHA7:miR-653          |
| rs41273625 | chr6:94009572              | EPHA7:miR-561          |
| rs34697788 | chr6:96768343              | FUT9:miR-520d*         |
| rs11966295 | chr6:97695162              | KLHL32:miR-656         |
| rs11966295 | chr6:97695162              | KLHL32:miR-23a         |
| rs11966295 | chr6:97695162              | KLHL32:miR-23b         |
| rs35800750 | chr6:100170095             | PRDM13:miR-660         |
| rs9486035  | chr6:105633870             | LIN28B:miR-769-3p      |
| rs10545196 | chr6:105712583             | POPDC3:miR-559         |
| rs2308162  | chr6:105712586             | POPDC3:miR-559         |
| rs35800305 | chr6:106740757             | ATG5:miR-365           |
| rs41292442 | chr6:107582205             | PDSS2:miR-423          |
| rs11363908 | chr6:107582298             | PDSS2:miR-595          |
| rs14502    | chr6:108087313             | FLJ10159:miR-148a      |
| rs3177228  | chr6:108639419             | SNX3:miR-361           |
| rs3177228  | chr6:108639419             | SNX3:miR-519a          |
| rs3177228  | chr6:108639419             | SNX3:miR-519b          |
| rs3177228  | chr6:108639419             | SNX3:miR-519c          |
| rs15321    | chr6:108639484             | SNX3:miR-568           |
| rs531393   | chr6:108639526             | SNX3:miR-205           |
| rs59053855 | chr6:109108071             | FOXO3:miR-335          |
| rs1268173  | chr6:109112606             | FOXO3:miR-584          |
| rs1803962  | chr6:109794442             | CD164:miR-223          |
| rs1803964  | chr6:109794989             | CD164:miR-374          |
| rs1803964  | chr6:109794989             | CD164:miR-369-3p       |
| rs1803964  | chr6:109794989             | CD164:miR-655          |
| rs61570809 | chr6:111038386             | CDC2L6:miR-380-3p      |
| rs4269406  | chr6:111038471             | CDC2L6:miR-653         |
| rs1061388  | chr6:111726987             | REV3L:miR-522          |
| rs465646   | chr6:111727451             | REV3L:miR-375          |
| rs55962943 | chr6:111727598             | REV3L:miR-520f         |
| rs17511602 | chr6:111727619             | REV3L:miR-30a-5p       |
| rs17511602 | chr6:111727619             | REV3L:miR-30b          |
| rs17511602 | chr6:111727619             | REV3L:miR-30c          |
| rs17511602 | chr6:111727619             | REV3L:miR-30d          |
| rs17511602 | chr6:111727619             | REV3L:miR-30e-5p       |
| rs41311410 | chr6:112089485             | FYN:miR-569            |

**Supplemental Table 4: SNPs in miRNA target sites based on PITA prediction**

| <b>SNP</b> | <b>SNP Position (hg18)</b> | <b>PITA Prediction</b> |
|------------|----------------------------|------------------------|
| rs3177143  | chr6:112528774             | LOC619208:miR-371      |
| rs1063446  | chr6:114288756             | MARCKS:miR-648         |
| rs12307    | chr6:114288801             | MARCKS:miR-563         |
| rs45460602 | chr6:114289225             | MARCKS:miR-655         |
| rs28558559 | chr6:114290941             | MARCKS:miR-410         |
| rs11391    | chr6:114368708             | HDAC2:miR-142-5p       |
| rs2105171  | chr6:116369550             | FRK:miR-450            |
| rs41289928 | chr6:116866042             | DSE:miR-136            |
| rs11544123 | chr6:117988335             | GOPC:miR-105           |
| rs11544123 | chr6:117988335             | GOPC:miR-429           |
| rs41305292 | chr6:117997545             | DCBLD1:miR-594         |
| rs1052258  | chr6:118134939             | C6orf68:miR-30a-5p     |
| rs1052258  | chr6:118134939             | C6orf68:miR-30b        |
| rs1052258  | chr6:118134939             | C6orf68:miR-30c        |
| rs1052258  | chr6:118134939             | C6orf68:miR-30d        |
| rs1052258  | chr6:118134939             | C6orf68:miR-30e-5p     |
| rs1053139  | chr6:118136462             | C6orf68:miR-597        |
| rs45541341 | chr6:118137352             | C6orf68:miR-361        |
| rs34758199 | chr6:118745384             | SLC35F1:miR-579        |
| rs3756943  | chr6:119542615             | MAN1A1:miR-361         |
| rs45494491 | chr6:122795415             | HSF2:miR-19a           |
| rs45494491 | chr6:122795415             | HSF2:miR-19b           |
| rs1132643  | chr6:123088715             | PKIB:miR-579           |
| rs17774884 | chr6:125187332             | TCBA1:miR-15a          |
| rs17774884 | chr6:125187332             | TCBA1:miR-15b          |
| rs17774884 | chr6:125187332             | TCBA1:miR-16           |
| rs17774884 | chr6:125187332             | TCBA1:miR-195          |
| rs17774884 | chr6:125187332             | TCBA1:miR-497          |
| rs1268078  | chr6:126123418             | HEY2:miR-15a           |
| rs1268078  | chr6:126123418             | HEY2:miR-15b           |
| rs1268078  | chr6:126123418             | HEY2:miR-16            |
| rs1268078  | chr6:126123418             | HEY2:miR-195           |
| rs1268078  | chr6:126123418             | HEY2:miR-497           |
| rs1268078  | chr6:126123418             | HEY2:miR-142-5p        |
| rs3839542  | chr6:126123960             | HEY2:miR-433           |
| rs41285254 | chr6:126292232             | NCOA7:miR-568          |
| rs1801763  | chr6:127806636             | KIAA0408:miR-500       |
| rs41285272 | chr6:127835982             | C6orf174:miR-511       |
| rs11544475 | chr6:128331718             | PTPRK:miR-613          |
| rs13201989 | chr6:128332789             | PTPRK:miR-568          |
| rs12965    | chr6:131202437             | EPB41L2:miR-147        |
| rs6900737  | chr6:131203036             | EPB41L2:miR-129        |
| rs6900737  | chr6:131203036             | EPB41L2:miR-194        |
| rs3777499  | chr6:131645136             | AKAP7:miR-662          |
| rs7746083  | chr6:131645346             | AKAP7:miR-627          |
| rs7746083  | chr6:131645346             | AKAP7:miR-661          |
| rs36028195 | chr6:134349945             | TBPL1:miR-145          |
| rs35776966 | chr6:134350418             | SLC2A12:miR-9          |
| rs55984236 | chr6:134532307             | SGK:miR-1              |
| rs55984236 | chr6:134532307             | SGK:miR-206            |
| rs7754021  | chr6:134532507             | SGK:miR-187            |
| rs7757811  | chr6:135324028             | HBS1L:miR-802          |

**Supplemental Table 4: SNPs in miRNA target sites based on PITA prediction**

| <b>SNP</b> | <b>SNP Position (hg18)</b> | <b>PITA Prediction</b> |
|------------|----------------------------|------------------------|
| rs10608076 | chr6:136555172             | PDE7B:miR-633          |
| rs6931460  | chr6:136555234             | PDE7B:miR-198          |
| rs6914212  | chr6:136555801             | PDE7B:miR-1            |
| rs6914212  | chr6:136555801             | PDE7B:miR-206          |
| rs62431281 | chr6:136623806             | BCLAF1:miR-653         |
| rs58541073 | chr6:136706683             | MAP7:miR-186           |
| rs11138    | chr6:136920127             | MAP3K5:miR-199a*       |
| rs57130404 | chr6:139603297             | TXLNB:miR-626          |
| rs4177     | chr6:139735276             | CITED2:miR-559         |
| rs4177     | chr6:139735276             | CITED2:miR-577         |
| rs4177     | chr6:139735276             | CITED2:miR-548c        |
| rs58995027 | chr6:139735280             | CITED2:miR-548c        |
| rs7763870  | chr6:139735439             | CITED2:miR-145         |
| rs3736731  | chr6:142581537             | C6orf55:miR-620        |
| rs58500519 | chr6:143115827             | HIVEP2:miR-606         |
| rs17072450 | chr6:143702808             | AIG1:miR-582           |
| rs1138410  | chr6:143788776             | DEADC1:miR-302c*       |
| rs41285017 | chr6:143852185             | PEX3:miR-143           |
| rs41285017 | chr6:143852185             | PEX3:miR-573           |
| rs10617218 | chr6:143852783             | PEX3:miR-142-5p        |
| rs10617218 | chr6:143852783             | PEX3:miR-381           |
| rs11969315 | chr6:144186615             | PHACTR2:miR-494        |
| rs1804733  | chr6:144303769             | PLAGL1:miR-181a        |
| rs1804733  | chr6:144303769             | PLAGL1:miR-181c        |
| rs11546879 | chr6:145214198             | UTRN:miR-578           |
| rs362820   | chr6:146798995             | GRM1:miR-568           |
| rs41285867 | chr6:146800295             | GRM1:miR-328           |
| rs1034245  | chr6:147748484             | STXBP5:miR-575         |
| rs237023   | chr6:149763733             | SUMO4:miR-494          |
| rs237023   | chr6:149763733             | SUMO4:miR-641          |
| rs35408612 | chr6:149772983             | MAP3K7IP2:miR-522      |
| rs34923937 | chr6:149773138             | MAP3K7IP2:miR-148b     |
| rs34923937 | chr6:149773138             | MAP3K7IP2:miR-152      |
| rs7896     | chr6:149773169             | MAP3K7IP2:miR-609      |
| rs35742973 | chr6:149773259             | MAP3K7IP2:miR-25       |
| rs35742973 | chr6:149773259             | MAP3K7IP2:miR-367      |
| rs35742973 | chr6:149773259             | MAP3K7IP2:miR-92       |
| rs35742973 | chr6:149773259             | MAP3K7IP2:miR-92b      |
| rs57481309 | chr6:150173773             | PCMT1:miR-548d         |
| rs4552     | chr6:150174012             | PCMT1:miR-584          |
| rs1061987  | chr6:151727845             | ZBTB2:miR-573          |
| rs9341070  | chr6:152461890             | ESR1:miR-122a          |
| rs56254212 | chr6:152463977             | ESR1:miR-524*          |
| rs9341074  | chr6:152464148             | ESR1:miR-660           |
| rs9341074  | chr6:152464148             | ESR1:miR-192           |
| rs9341074  | chr6:152464148             | ESR1:miR-215           |
| rs9341074  | chr6:152464148             | ESR1:miR-193b          |
| rs3798757  | chr6:152465936             | ESR1:miR-586           |
| rs3798757  | chr6:152465936             | ESR1:miR-648           |
| rs11558463 | chr6:152484616             | SYNE1:miR-181a         |
| rs11558463 | chr6:152484616             | SYNE1:miR-181c         |
| rs3940     | chr6:155620448             | TIAM2:miR-196a         |

**Supplemental Table 4: SNPs in miRNA target sites based on PITA prediction**

| <b>SNP</b> | <b>SNP Position (hg18)</b> | <b>PITA Prediction</b> |
|------------|----------------------------|------------------------|
| rs3940     | chr6:155620448             | TIAM2:miR-196b         |
| rs41268579 | chr6:158285541             | SNX9:miR-302a          |
| rs41268579 | chr6:158285541             | SNX9:miR-302b          |
| rs41268579 | chr6:158285541             | SNX9:miR-302c          |
| rs41268579 | chr6:158285541             | SNX9:miR-302d          |
| rs41268579 | chr6:158285541             | SNX9:miR-373           |
| rs41268579 | chr6:158285541             | SNX9:miR-520a          |
| rs41268579 | chr6:158285541             | SNX9:miR-520b          |
| rs41268579 | chr6:158285541             | SNX9:miR-520c          |
| rs41268579 | chr6:158285541             | SNX9:miR-520d          |
| rs41268579 | chr6:158285541             | SNX9:miR-520e          |
| rs41268579 | chr6:158285541             | SNX9:miR-526b*         |
| rs41268579 | chr6:158285541             | SNX9:miR-106a          |
| rs41268579 | chr6:158285541             | SNX9:miR-106b          |
| rs41268579 | chr6:158285541             | SNX9:miR-17-5p         |
| rs41268579 | chr6:158285541             | SNX9:miR-20a           |
| rs41268579 | chr6:158285541             | SNX9:miR-20b           |
| rs11962969 | chr6:160090154             | WTAP:miR-154           |
| rs14531    | chr6:160447498             | IGF2R:miR-185          |
| rs56157187 | chr6:163656256             | PACRG:miR-568          |
| rs41268567 | chr6:163656260             | PACRG:miR-568          |
| rs1044933  | chr6:163912453             | QKI:miR-559            |
| rs17592297 | chr6:163912634             | QKI:miR-148a           |
| rs4286788  | chr6:169847650             | C6orf120:miR-299-3p    |
| rs11557645 | chr6:170723647             | TBP:miR-625            |
| rs11557645 | chr6:170723647             | TBP:miR-491            |
| rs55985680 | chr6:170723780             | TBP:miR-431            |
| rs55985680 | chr6:170723780             | TBP:miR-630            |
| rs14782    | chr7:880916                | UNC84A:miR-559         |
| rs3183457  | chr7:880930                | UNC84A:miR-431         |
| rs1044528  | chr7:1549127               | MGC9712:miR-197        |
| rs1044529  | chr7:1549130               | MGC9712:miR-197        |
| rs11546922 | chr7:5533463               | ACTB:miR-559           |
| rs11546922 | chr7:5533463               | ACTB:miR-577           |
| rs3206243  | chr7:5533472               | ACTB:miR-653           |
| rs3206243  | chr7:5533472               | ACTB:miR-559           |
| rs3210647  | chr7:5533523               | ACTB:miR-557           |
| rs11546923 | chr7:5533536               | ACTB:miR-155           |
| rs11546918 | chr7:5533670               | ACTB:miR-570           |
| rs11546919 | chr7:5533673               | ACTB:miR-570           |
| rs11546941 | chr7:5533682               | ACTB:miR-648           |
| rs13447411 | chr7:5533695               | ACTB:miR-588           |
| rs13447411 | chr7:5533695               | ACTB:miR-221           |
| rs11546911 | chr7:5533704               | ACTB:miR-23a           |
| rs11546911 | chr7:5533704               | ACTB:miR-23b           |
| rs1802568  | chr7:5612718               | FSCN1:miR-577          |
| rs1802568  | chr7:5612718               | FSCN1:miR-559          |
| rs9401     | chr7:5626311               | TRIAD3:miR-361         |
| rs6970518  | chr7:6169158               | PSCD3:miR-637          |
| rs11354120 | chr7:6469081               | KDELRL2:miR-548c       |
| rs10259049 | chr7:7250055               | C1GALT1:miR-521        |
| rs14673    | chr7:8092937               | GLCC11:miR-203         |

**Supplemental Table 4: SNPs in miRNA target sites based on PITA prediction**

| <b>SNP</b> | <b>SNP Position (hg18)</b> | <b>PITA Prediction</b> |
|------------|----------------------------|------------------------|
| rs13236609 | chr7:12239403              | TMEM106B:miR-577       |
| rs61046115 | chr7:12242201              | TMEM106B:miR-613       |
| rs1058268  | chr7:12695794              | ARL4A:miR-106a         |
| rs1058268  | chr7:12695794              | ARL4A:miR-106b         |
| rs1058268  | chr7:12695794              | ARL4A:miR-17-5p        |
| rs1058268  | chr7:12695794              | ARL4A:miR-20a          |
| rs1058268  | chr7:12695794              | ARL4A:miR-20b          |
| rs34958926 | chr7:12696106              | ARL4A:miR-186          |
| rs3735343  | chr7:13900883              | ETV1:miR-583           |
| rs28627933 | chr7:13901833              | ETV1:miR-26a           |
| rs28627933 | chr7:13901833              | ETV1:miR-26b           |
| rs17167929 | chr7:14154194              | DGKB:miR-516-3p        |
| rs17168900 | chr7:15618124              | MEOX2:miR-189          |
| rs1050291  | chr7:15618129              | MEOX2:miR-655          |
| rs1131061  | chr7:15618265              | MEOX2:miR-335          |
| rs1131061  | chr7:15618265              | MEOX2:miR-559          |
| rs6979189  | chr7:16467979              | SOSTDC1:miR-186        |
| rs14556    | chr7:16712557              | BZW2:miR-101           |
| rs1043232  | chr7:16712573              | BZW2:miR-608           |
| rs2691583  | chr7:17798331              | SNX13:miR-25           |
| rs2691583  | chr7:17798331              | SNX13:miR-367          |
| rs2691583  | chr7:17798331              | SNX13:miR-92           |
| rs2691583  | chr7:17798331              | SNX13:miR-92b          |
| rs2691583  | chr7:17798331              | SNX13:miR-191*         |
| rs35082525 | chr7:17798781              | SNX13:miR-659          |
| rs60675760 | chr7:18673898              | HDAC9:miR-515-3p       |
| rs60675760 | chr7:18673898              | HDAC9:miR-376a         |
| rs60675760 | chr7:18673898              | HDAC9:miR-376b         |
| rs706086   | chr7:18674367              | HDAC9:miR-299-3p       |
| rs706086   | chr7:18674367              | HDAC9:miR-147          |
| rs35259071 | chr7:19122056              | TWIST1:miR-361         |
| rs28398883 | chr7:20418968              | ITGB8:miR-623          |
| rs1045957  | chr7:20421339              | ITGB8:miR-19a          |
| rs1045957  | chr7:20421339              | ITGB8:miR-19b          |
| rs35578769 | chr7:20788496              | SP8:miR-19a            |
| rs35578769 | chr7:20788496              | SP8:miR-19b            |
| rs35130029 | chr7:20788988              | SP8:miR-542-3p         |
| rs62453408 | chr7:20789501              | SP8:miR-10a            |
| rs62453408 | chr7:20789501              | SP8:miR-10b            |
| rs59521022 | chr7:22124495              | RAPGEF5:miR-186        |
| rs2069851  | chr7:22737829              | IL6:miR-574            |
| rs34846708 | chr7:23317296              | IGF2BP3:miR-562        |
| rs2268743  | chr7:23317565              | IGF2BP3:miR-548a       |
| rs2268741  | chr7:23318082              | IGF2BP3:miR-578        |
| rs58989925 | chr7:23511636              | TRA2A:miR-216          |
| rs59626159 | chr7:23650502              | LOC90693:miR-203       |
| rs13240851 | chr7:25142084              | C7orf31:miR-485-5p     |
| rs1049938  | chr7:26196697              | HNRNPA2B1:miR-583      |
| rs1049938  | chr7:26196697              | HNRNPA2B1:miR-7        |
| rs3210104  | chr7:26197215              | HNRNPA2B1:miR-573      |
| rs3210104  | chr7:26197215              | HNRNPA2B1:miR-143      |
| rs3210101  | chr7:26197219              | HNRNPA2B1:miR-518a     |

**Supplemental Table 4: SNPs in miRNA target sites based on PITA prediction**

| <b>SNP</b> | <b>SNP Position (hg18)</b> | <b>PITA Prediction</b> |
|------------|----------------------------|------------------------|
| rs3210101  | chr7:26197219              | HNRNPA2B1:miR-518e     |
| rs3210101  | chr7:26197219              | HNRNPA2B1:miR-518f     |
| rs3210100  | chr7:26197220              | HNRNPA2B1:miR-518a     |
| rs3210100  | chr7:26197220              | HNRNPA2B1:miR-518e     |
| rs3210100  | chr7:26197220              | HNRNPA2B1:miR-518f     |
| rs1049851  | chr7:26198049              | HNRNPA2B1:miR-521      |
| rs1049851  | chr7:26198049              | HNRNPA2B1:miR-523      |
| rs11557711 | chr7:26198127              | HNRNPA2B1:miR-548c     |
| rs9807     | chr7:26198130              | HNRNPA2B1:miR-548c     |
| rs28407029 | chr7:26219491              | CBX3:miR-1             |
| rs28407029 | chr7:26219491              | CBX3:miR-206           |
| rs17154295 | chr7:26673327              | SCAP2:miR-31           |
| rs17154295 | chr7:26673327              | SCAP2:miR-520g         |
| rs17154295 | chr7:26673327              | SCAP2:miR-520h         |
| rs17154295 | chr7:26673327              | SCAP2:miR-106a         |
| rs17154295 | chr7:26673327              | SCAP2:miR-106b         |
| rs17154295 | chr7:26673327              | SCAP2:miR-17-5p        |
| rs17154295 | chr7:26673327              | SCAP2:miR-20a          |
| rs17154295 | chr7:26673327              | SCAP2:miR-20b          |
| rs7786554  | chr7:27099494              | HOXA1:miR-100          |
| rs7786554  | chr7:27099494              | HOXA1:miR-99a          |
| rs7786554  | chr7:27099494              | HOXA1:miR-99b          |
| rs17449017 | chr7:27099672              | HOXA1:miR-181b         |
| rs17449017 | chr7:27099672              | HOXA1:miR-181d         |
| rs41305921 | chr7:27100130              | HOXA1:miR-30a-5p       |
| rs41305921 | chr7:27100130              | HOXA1:miR-30b          |
| rs41305921 | chr7:27100130              | HOXA1:miR-30c          |
| rs41305921 | chr7:27100130              | HOXA1:miR-30d          |
| rs41305921 | chr7:27100130              | HOXA1:miR-30e-5p       |
| rs34462126 | chr7:27100908              | HOXA1:miR-380-5p       |
| rs34462126 | chr7:27100908              | HOXA1:miR-640          |
| rs17427553 | chr7:27106569              | HOXA2:miR-559          |
| rs17427553 | chr7:27106569              | HOXA2:miR-577          |
| rs35828289 | chr7:27112920              | HOXA3:miR-646          |
| rs5883060  | chr7:27113660              | HOXA3:miR-186          |
| rs5883060  | chr7:27113660              | HOXA3:miR-561          |
| rs35000351 | chr7:27113661              | HOXA3:miR-186          |
| rs35000351 | chr7:27113661              | HOXA3:miR-561          |
| rs58116373 | chr7:27147929              | HOXA5:miR-514          |
| rs1057512  | chr7:27160128              | HOXA7:miR-548c         |
| rs36075045 | chr7:27176953              | HOXA10:miR-584         |
| rs58173083 | chr7:27176954              | HOXA10:miR-584         |
| rs41303372 | chr7:27204229              | HOXA13:miR-511         |
| rs58967392 | chr7:28826372              | CREB5:miR-600          |
| rs36036244 | chr7:28829673              | CREB5:miR-203          |
| rs36036244 | chr7:28829673              | CREB5:miR-362          |
| rs55751478 | chr7:28959569              | KIAA0644:miR-7         |
| rs12611    | chr7:29519302              | CHN2:miR-577           |
| rs3834868  | chr7:29519322              | CHN2:miR-578           |
| rs34184    | chr7:31713470              | C7orf16:miR-513        |
| rs10736    | chr7:32493212              | LSM5:miR-28            |
| rs11550335 | chr7:32493212              | LSM5:miR-28            |



**Supplemental Table 4: SNPs in miRNA target sites based on PITA prediction**

| <b>SNP</b> | <b>SNP Position (hg18)</b> | <b>PITA Prediction</b> |
|------------|----------------------------|------------------------|
| rs34489869 | chr7:34159756              | BMPER:miR-516-3p       |
| rs1044428  | chr7:34935339              | DPY19L1:miR-330        |
| rs62454466 | chr7:35911400              | SEPT7:miR-369-3p       |
| rs2722279  | chr7:37957654              | EPDR1:miR-559          |
| rs10696    | chr7:38236484              | STARD3NL:miR-210       |
| rs17421361 | chr7:38266314              | TARP:miR-202           |
| rs17421361 | chr7:38266314              | TARP:miR-380-3p        |
| rs58654742 | chr7:38390865              | AMPH:miR-802           |
| rs28464333 | chr7:39714240              | RALA:miR-583           |
| rs35784619 | chr7:41695151              | INHBA:miR-583          |
| rs35239129 | chr7:41695362              | INHBA:miR-135a         |
| rs35239129 | chr7:41695362              | INHBA:miR-135b         |
| rs1139448  | chr7:41695599              | INHBA:miR-205          |
| rs1139448  | chr7:41695599              | INHBA:miR-579          |
| rs2051935  | chr7:41970025              | GLI3:miR-320           |
| rs59496591 | chr7:43631298              | STK17A:miR-96          |
| rs56252693 | chr7:44840507              | H2AFV:miR-139          |
| rs56252693 | chr7:44840507              | H2AFV:miR-199a*        |
| rs9701     | chr7:44885725              | PURB:miR-185           |
| rs15555    | chr7:44885974              | PURB:miR-383           |
| rs15555    | chr7:44885974              | PURB:miR-106a          |
| rs15555    | chr7:44885974              | PURB:miR-106b          |
| rs15555    | chr7:44885974              | PURB:miR-17-5p         |
| rs15555    | chr7:44885974              | PURB:miR-20a           |
| rs15555    | chr7:44885974              | PURB:miR-20b           |
| rs15555    | chr7:44885974              | PURB:miR-302a          |
| rs15555    | chr7:44885974              | PURB:miR-302b          |
| rs15555    | chr7:44885974              | PURB:miR-302c          |
| rs15555    | chr7:44885974              | PURB:miR-302d          |
| rs15555    | chr7:44885974              | PURB:miR-373           |
| rs15555    | chr7:44885974              | PURB:miR-520a          |
| rs15555    | chr7:44885974              | PURB:miR-520b          |
| rs15555    | chr7:44885974              | PURB:miR-520c          |
| rs15555    | chr7:44885974              | PURB:miR-520d          |
| rs15555    | chr7:44885974              | PURB:miR-520e          |
| rs15555    | chr7:44885974              | PURB:miR-526b*         |
| rs3832522  | chr7:44887769              | PURB:miR-768-5p        |
| rs5883913  | chr7:44888182              | PURB:miR-580           |
| rs35838415 | chr7:45729058              | ADCY1:miR-132          |
| rs35838415 | chr7:45729058              | ADCY1:miR-212          |
| rs35360380 | chr7:45729215              | ADCY1:miR-204          |
| rs35360380 | chr7:45729215              | ADCY1:miR-211          |
| rs4209     | chr7:45729217              | ADCY1:miR-204          |
| rs4209     | chr7:45729217              | ADCY1:miR-211          |
| rs1128602  | chr7:45729221              | ADCY1:miR-204          |
| rs1128602  | chr7:45729221              | ADCY1:miR-211          |
| rs4988516  | chr7:45899449              | IGFBP1:miR-433         |
| rs13310009 | chr7:50479367              | FIGNL1:miR-539         |
| rs35341588 | chr7:50625335              | GRB10:miR-561          |
| rs34367018 | chr7:56034720              | GBAS:miR-510           |
| rs3217414  | chr7:56034721              | GBAS:miR-510           |
| rs1803516  | chr7:56098458              | CCT6A:miR-130a         |

**Supplemental Table 4: SNPs in miRNA target sites based on PITA prediction**

| <b>SNP</b> | <b>SNP Position (hg18)</b> | <b>PITA Prediction</b> |
|------------|----------------------------|------------------------|
| rs1803516  | chr7:56098458              | CCT6A:miR-130b         |
| rs1803516  | chr7:56098458              | CCT6A:miR-301          |
| rs1803516  | chr7:56098458              | CCT6A:miR-454-3p       |
| rs10266872 | chr7:64027675              | ZNF273:miR-495         |
| rs3801156  | chr7:70886612              | CALN1:miR-758          |
| rs446631   | chr7:72054766              | POM121:miR-325         |
| rs799219   | chr7:72493178              | BAZ1B:miR-185          |
| rs799219   | chr7:72493178              | BAZ1B:miR-583          |
| rs799219   | chr7:72493178              | BAZ1B:miR-7            |
| rs3833681  | chr7:72493608              | BAZ1B:miR-186          |
| rs62466282 | chr7:72588633              | BCL7B:miR-522          |
| rs11557175 | chr7:72589457              | BCL7B:miR-657          |
| rs3203011  | chr7:74978262              | PMS2L3:miR-204         |
| rs3203011  | chr7:74978262              | PMS2L3:miR-211         |
| rs1128035  | chr7:76778061              | LOC54103:miR-577       |
| rs7794033  | chr7:77423300              | PHTF2:miR-299-5p       |
| rs1138801  | chr7:79685288              | GNAI1:miR-19a          |
| rs1138801  | chr7:79685288              | GNAI1:miR-19b          |
| rs1138801  | chr7:79685288              | GNAI1:miR-568          |
| rs11549157 | chr7:82289556              | PCLO:miR-577           |
| rs11549156 | chr7:82289560              | PCLO:miR-577           |
| rs7801026  | chr7:83425821              | SEMA3A:miR-491         |
| rs9684     | chr7:86663558              | C7orf23:miR-577        |
| rs2013937  | chr7:89704739              | STEAP2:miR-32          |
| rs9731     | chr7:89882881              | CLDN12:miR-135a        |
| rs9731     | chr7:89882881              | CLDN12:miR-135b        |
| rs9731     | chr7:89882881              | CLDN12:miR-432*        |
| rs57094099 | chr7:90674852              | PFTK1:miR-801          |
| rs57094099 | chr7:90674852              | PFTK1:miR-33b          |
| rs35145764 | chr7:90677600              | PFTK1:miR-154*         |
| rs35145764 | chr7:90677600              | PFTK1:miR-487a         |
| rs35145764 | chr7:90677600              | PFTK1:miR-487b         |
| rs3088018  | chr7:90677601              | PFTK1:miR-154*         |
| rs3088018  | chr7:90677601              | PFTK1:miR-487a         |
| rs3088018  | chr7:90677601              | PFTK1:miR-487b         |
| rs1045701  | chr7:91926032              | GATAD1:miR-382         |
| rs1044920  | chr7:92029445              | MGC40405:miR-517a      |
| rs1044920  | chr7:92029445              | MGC40405:miR-517c      |
| rs28756324 | chr7:92075760              | CDK6:miR-559           |
| rs28756324 | chr7:92075760              | CDK6:miR-577           |
| rs28736851 | chr7:92075761              | CDK6:miR-559           |
| rs28736851 | chr7:92075761              | CDK6:miR-577           |
| rs34855746 | chr7:92078871              | CDK6:miR-561           |
| rs3202178  | chr7:93897937              | COL1A2:miR-140         |
| rs3202178  | chr7:93897937              | COL1A2:miR-584         |
| rs1061207  | chr7:93897952              | COL1A2:miR-19a         |
| rs1061207  | chr7:93897952              | COL1A2:miR-19b         |
| rs28364823 | chr7:94135230              | PEG10:miR-570          |
| rs17773605 | chr7:94762474              | PPP1R9A:miR-768-3p     |
| rs2272281  | chr7:96478206              | DLX6:miR-144           |
| rs2272282  | chr7:96478213              | DLX6:miR-144           |
| rs9373     | chr7:98463193              | SMURF1:miR-553         |

**Supplemental Table 4: SNPs in miRNA target sites based on PITA prediction**

| <b>SNP</b> | <b>SNP Position (hg18)</b> | <b>PITA Prediction</b> |
|------------|----------------------------|------------------------|
| rs14431    | chr7:98801718              | ARPC1A:miR-583         |
| rs11546363 | chr7:99011236              | ZNF655:miR-492         |
| rs13230847 | chr7:99590194              | FLJ10925:miR-216       |
| rs11512    | chr7:99902129              | TSC22D4:miR-490        |
| rs11559120 | chr7:99902129              | TSC22D4:miR-490        |
| rs11512    | chr7:99902129              | TSC22D4:miR-216        |
| rs11559120 | chr7:99902129              | TSC22D4:miR-216        |
| rs1052679  | chr7:100114554             | GNB2:miR-629           |
| rs35095297 | chr7:100116401             | PERQ1:miR-181b         |
| rs35095297 | chr7:100116401             | PERQ1:miR-181d         |
| rs2227714  | chr7:100568629             | SERPINE1:miR-10a       |
| rs2227714  | chr7:100568629             | SERPINE1:miR-10b       |
| rs1801003  | chr7:100568673             | SERPINE1:miR-425-5p    |
| rs11762601 | chr7:100987767             | EMID2:miR-766          |
| rs7457507  | chr7:102740187             | ZRF1:miR-580           |
| rs7811571  | chr7:102900344             | RELN:miR-491           |
| rs2307411  | chr7:103554432             | ORC5L:miR-610          |
| rs62486628 | chr7:104541644             | MLL5:miR-154*          |
| rs62486628 | chr7:104541644             | MLL5:miR-487a          |
| rs2073550  | chr7:104544719             | SRPK2:miR-801          |
| rs3192850  | chr7:104884511             | PUS7:miR-506           |
| rs10263784 | chr7:105678700             | PBEF1:miR-605          |
| rs10263784 | chr7:105678700             | PBEF1:miR-342          |
| rs62467974 | chr7:107187019             | CBLL1:miR-526b         |
| rs4727712  | chr7:108001681             | DNAJB9:miR-132         |
| rs4727712  | chr7:108001681             | DNAJB9:miR-212         |
| rs34492231 | chr7:110552393             | LRRN3:miR-188          |
| rs59573982 | chr7:112193225             | FLJ13576:miR-522       |
| rs59573982 | chr7:112193225             | FLJ13576:miR-135a      |
| rs59573982 | chr7:112193225             | FLJ13576:miR-135b      |
| rs11538991 | chr7:112193721             | FLJ13576:miR-768-5p    |
| rs2255813  | chr7:112509514             | GPR85:miR-382          |
| rs3823516  | chr7:112509521             | GPR85:miR-592          |
| rs60685449 | chr7:112510745             | GPR85:miR-508          |
| rs60956131 | chr7:115987021             | CAV1:miR-346           |
| rs34585220 | chr7:115988172             | CAV1:miR-559           |
| rs6868     | chr7:115988260             | CAV1:miR-140           |
| rs41281081 | chr7:116223501             | MET:miR-335            |
| rs1621     | chr7:116224842             | MET:miR-199a*          |
| rs1801056  | chr7:116345266             | CAPZA2:miR-140         |
| rs1801055  | chr7:116345353             | CAPZA2:miR-30a-3p      |
| rs1801055  | chr7:116345353             | CAPZA2:miR-30e-3p      |
| rs4730796  | chr7:117138399             | CTTNBP2:miR-553        |
| rs1061731  | chr7:117619374             | LSM8:miR-181b          |
| rs1061731  | chr7:117619374             | LSM8:miR-181d          |
| rs1061731  | chr7:117619374             | LSM8:miR-574           |
| rs13225586 | chr7:120175764             | KCND2:miR-557          |
| rs13238427 | chr7:120175926             | KCND2:miR-548c         |
| rs13238785 | chr7:120175950             | KCND2:miR-516-5p       |
| rs34866637 | chr7:121488849             | PTPRZ1:miR-514         |
| rs34866637 | chr7:121488849             | PTPRZ1:miR-96          |
| rs1073682  | chr7:123110320             | WASL:miR-498           |

**Supplemental Table 4: SNPs in miRNA target sites based on PITA prediction**

| <b>SNP</b> | <b>SNP Position (hg18)</b> | <b>PITA Prediction</b> |
|------------|----------------------------|------------------------|
| rs61387239 | chr7:123111403             | WASL:miR-1             |
| rs61387239 | chr7:123111403             | WASL:miR-206           |
| rs61387239 | chr7:123111403             | WASL:miR-142-3p        |
| rs34182595 | chr7:125866120             | GRM8:miR-103           |
| rs34182595 | chr7:125866120             | GRM8:miR-107           |
| rs35834356 | chr7:126798171             | LOC168850:miR-625      |
| rs35834356 | chr7:126798171             | LOC168850:miR-185      |
| rs17866349 | chr7:126798922             | LOC168850:miR-515-3p   |
| rs11539551 | chr7:127018927             | ARF5:miR-412           |
| rs41274233 | chr7:128198200             | CALU:miR-7             |
| rs11545535 | chr7:128198584             | CALU:miR-495           |
| rs1048459  | chr7:128286482             | FLNC:miR-320           |
| rs10954213 | chr7:128376663             | IRF5:miR-181b          |
| rs10954213 | chr7:128376663             | IRF5:miR-181d          |
| rs1046499  | chr7:128595568             | TSPAN33:miR-663        |
| rs1061285  | chr7:128640544             | SMO:miR-626            |
| rs35624913 | chr7:129557998             | KIAA0265:miR-491       |
| rs35624913 | chr7:129557998             | KIAA0265:miR-299-3p    |
| rs13228714 | chr7:129643610             | LOC136263:miR-140      |
| rs1050667  | chr7:129933229             | MEST:miR-140           |
| rs1050667  | chr7:129933229             | MEST:miR-644           |
| rs1050667  | chr7:129933229             | MEST:miR-203           |
| rs1803442  | chr7:129933230             | MEST:miR-140           |
| rs1803442  | chr7:129933230             | MEST:miR-644           |
| rs1803442  | chr7:129933230             | MEST:miR-203           |
| rs397594   | chr7:130823293             | MKLN1:miR-142-5p       |
| rs61633212 | chr7:131458802             | PLXNA4:miR-145         |
| rs1803232  | chr7:134303836             | CALD1:miR-34b          |
| rs1803232  | chr7:134303836             | CALD1:miR-527          |
| rs11204    | chr7:134304470             | CALD1:miR-142-5p       |
| rs14469    | chr7:134697359             | CNOT4:miR-653          |
| rs17168525 | chr7:135263802             | MTPN:miR-202           |
| rs8191992  | chr7:136351848             | CHRM2:miR-383          |
| rs1451527  | chr7:136563023             | PTN:miR-203            |
| rs1731951  | chr7:136726387             | DGKI:miR-376a*         |
| rs2351859  | chr7:137210366             | CREB3L2:miR-520d*      |
| rs13233916 | chr7:138524956             | TTC26:miR-506          |
| rs17160856 | chr7:138633246             | FLJ25778:miR-139       |
| rs17160856 | chr7:138633246             | FLJ25778:miR-27a       |
| rs17160856 | chr7:138633246             | FLJ25778:miR-27b       |
| rs35625460 | chr7:138642693             | FLJ25778:miR-603       |
| rs35625460 | chr7:138642693             | FLJ25778:miR-641       |
| rs35625460 | chr7:138642693             | FLJ25778:miR-124a      |
| rs1127424  | chr7:138758200             | LUC7L2:miR-517*        |
| rs12703525 | chr7:139431110             | KIAA1718:miR-372       |
| rs12703525 | chr7:139431110             | KIAA1718:miR-93        |
| rs17620927 | chr7:139799780             | MKRN1:miR-106a         |
| rs17620927 | chr7:139799780             | MKRN1:miR-106b         |
| rs17620927 | chr7:139799780             | MKRN1:miR-17-5p        |
| rs17620927 | chr7:139799780             | MKRN1:miR-20a          |
| rs17620927 | chr7:139799780             | MKRN1:miR-20b          |
| rs17620927 | chr7:139799780             | MKRN1:miR-519d         |

**Supplemental Table 4: SNPs in miRNA target sites based on PITA prediction**

| <b>SNP</b> | <b>SNP Position (hg18)</b> | <b>PITA Prediction</b> |
|------------|----------------------------|------------------------|
| rs17620927 | chr7:139799780             | MKRN1:miR-302a         |
| rs17620927 | chr7:139799780             | MKRN1:miR-302b         |
| rs17620927 | chr7:139799780             | MKRN1:miR-302c         |
| rs17620927 | chr7:139799780             | MKRN1:miR-302d         |
| rs17620927 | chr7:139799780             | MKRN1:miR-373          |
| rs17620927 | chr7:139799780             | MKRN1:miR-519e         |
| rs17620927 | chr7:139799780             | MKRN1:miR-520a         |
| rs17620927 | chr7:139799780             | MKRN1:miR-520b         |
| rs17620927 | chr7:139799780             | MKRN1:miR-520c         |
| rs17620927 | chr7:139799780             | MKRN1:miR-520d         |
| rs17620927 | chr7:139799780             | MKRN1:miR-520e         |
| rs17620927 | chr7:139799780             | MKRN1:miR-526b*        |
| rs11556753 | chr7:139800458             | MKRN1:miR-373*         |
| rs34116813 | chr7:139800726             | MKRN1:miR-513          |
| rs35607238 | chr7:141005376             | KIAA1147:miR-589       |
| rs11551881 | chr7:142711140             | CASP2:let-7e           |
| rs8829     | chr7:148135551             | EZH2:miR-101           |
| rs11541108 | chr7:148135587             | EZH2:miR-567           |
| rs11764897 | chr7:149701995             | REPIN1:miR-520a*       |
| rs11764897 | chr7:149701995             | REPIN1:miR-525         |
| rs41312081 | chr7:150272989             | KCNH2:miR-651          |
| rs11772645 | chr7:150344499             | ATG9B:miR-657          |
| rs11772645 | chr7:150344499             | ATG9B:miR-637          |
| rs3800789  | chr7:150344760             | ATG9B:miR-647          |
| rs11542751 | chr7:150404476             | SLC4A2:miR-583         |
| rs11542751 | chr7:150404476             | SLC4A2:miR-577         |
| rs7429     | chr7:150884159             | PRKAG2:miR-769-3p      |
| rs62481481 | chr7:151463368             | MLL3:miR-659           |
| rs62472998 | chr7:154316351             | DPP6:miR-381           |
| rs34506906 | chr7:154366348             | PAXIP1:miR-519a        |
| rs34506906 | chr7:154366348             | PAXIP1:miR-519b        |
| rs34506906 | chr7:154366348             | PAXIP1:miR-519c        |
| rs1129896  | chr7:154731992             | INSIG1:miR-559         |
| rs1129897  | chr7:154731993             | INSIG1:miR-559         |
| rs1006525  | chr7:155264962             | RBM33:miR-768-5p       |
| rs1053214  | chr7:156168208             | LMBR1:miR-380-3p       |
| rs35152520 | chr7:156871698             | DNAJB6:miR-145         |
| rs2366514  | chr7:156871699             | DNAJB6:miR-145         |
| rs35732045 | chr7:156871715             | DNAJB6:miR-559         |
| rs57227525 | chr7:156871754             | DNAJB6:miR-634         |
| rs6992443  | chr8:1637345               | DLGAP2:miR-377         |
| rs6992443  | chr8:1637345               | DLGAP2:miR-154*        |
| rs6992443  | chr8:1637345               | DLGAP2:miR-487a        |
| rs6992443  | chr8:1637345               | DLGAP2:miR-126*        |
| rs34664602 | chr8:1638873               | DLGAP2:miR-129         |
| rs60260705 | chr8:1893461               | ARHGEF10:miR-380-3p    |
| rs60260705 | chr8:1893461               | ARHGEF10:miR-130a      |
| rs60260705 | chr8:1893461               | ARHGEF10:miR-130b      |
| rs60260705 | chr8:1893461               | ARHGEF10:miR-301       |
| rs60260705 | chr8:1893461               | ARHGEF10:miR-454-3p    |
| rs11986753 | chr8:1894116               | ARHGEF10:miR-490       |
| rs59430375 | chr8:2780553               | CSMD1:miR-186          |

**Supplemental Table 4: SNPs in miRNA target sites based on PITA prediction**

| <b>SNP</b> | <b>SNP Position (hg18)</b> | <b>PITA Prediction</b> |
|------------|----------------------------|------------------------|
| rs56986664 | chr8:2781167               | CSMD1:miR-567          |
| rs3214964  | chr8:2782827               | CSMD1:miR-361          |
| rs3735812  | chr8:11654774              | GATA4:miR-191          |
| rs62494571 | chr8:12077546              | FAM86B1:miR-575        |
| rs1018856  | chr8:12623853              | LONRF1:miR-137         |
| rs7005881  | chr8:12624420              | LONRF1:miR-34a         |
| rs7005881  | chr8:12624420              | LONRF1:miR-34c         |
| rs7005881  | chr8:12624420              | LONRF1:miR-449         |
| rs7005881  | chr8:12624420              | LONRF1:miR-449b        |
| rs7005881  | chr8:12624420              | LONRF1:miR-142-3p      |
| rs17118615 | chr8:13991886              | SGCZ:miR-143           |
| rs14732    | chr8:15666322              | TUSC3:miR-603          |
| rs34625377 | chr8:17131791              | CNOT7:miR-142-5p       |
| rs11554623 | chr8:17132288              | CNOT7:miR-559          |
| rs8276     | chr8:17197228              | VPS37A:miR-539         |
| rs7001231  | chr8:19306010              | ChGn:miR-581           |
| rs8011     | chr8:20123322              | ATP6V1B2:miR-25        |
| rs8011     | chr8:20123322              | ATP6V1B2:miR-367       |
| rs8011     | chr8:20123322              | ATP6V1B2:miR-92        |
| rs8011     | chr8:20123322              | ATP6V1B2:miR-92b       |
| rs2960142  | chr8:21919197              | XPO7:miR-432           |
| rs15168    | chr8:21919870              | XPO7:miR-577           |
| rs1063441  | chr8:21995746              | EPB49:miR-526b         |
| rs61350751 | chr8:22017546              | RAI16:miR-182          |
| rs55931974 | chr8:22027914              | HR:miR-186             |
| rs34341867 | chr8:22334511              | SLC39A14:miR-765       |
| rs34341867 | chr8:22334511              | SLC39A14:miR-516-5p    |
| rs34341867 | chr8:22334511              | SLC39A14:miR-490       |
| rs7431     | chr8:22454407              | PPP3CC:miR-570         |
| rs58582390 | chr8:23756465              | STC1:miR-454-5p        |
| rs58582390 | chr8:23756465              | STC1:miR-668           |
| rs13252190 | chr8:23756609              | STC1:miR-574           |
| rs60163317 | chr8:23758153              | STC1:miR-564           |
| rs60163317 | chr8:23758153              | STC1:miR-144           |
| rs60163317 | chr8:23758153              | STC1:miR-148a          |
| rs4056572  | chr8:25341643              | KCTD9:miR-573          |
| rs4056572  | chr8:25341643              | KCTD9:miR-522          |
| rs4056574  | chr8:25341689              | KCTD9:miR-154          |
| rs62502020 | chr8:25341885              | KCTD9:miR-629          |
| rs3057729  | chr8:25342702              | KCTD9:miR-559          |
| rs10495    | chr8:26571389              | DPYSL2:miR-548d        |
| rs1058457  | chr8:26571493              | DPYSL2:miR-34b         |
| rs17055967 | chr8:26683182              | ADRA1A:miR-559         |
| rs17055967 | chr8:26683182              | ADRA1A:miR-577         |
| rs2271920  | chr8:27372034              | PTK2B:miR-331          |
| rs35521239 | chr8:28260413              | ZNF395:miR-605         |
| rs35521239 | chr8:28260413              | ZNF395:miR-454-5p      |
| rs62502406 | chr8:28260417              | ZNF395:miR-605         |
| rs62502406 | chr8:28260417              | ZNF395:miR-454-5p      |
| rs2692     | chr8:28980813              | KIF13B:miR-496         |
| rs10088145 | chr8:30535973              | RBPMS:miR-562          |
| rs1046     | chr8:30763168              | PPP2CB:miR-155         |

**Supplemental Table 4: SNPs in miRNA target sites based on PITA prediction**

| <b>SNP</b> | <b>SNP Position (hg18)</b> | <b>PITA Prediction</b> |
|------------|----------------------------|------------------------|
| rs1044     | chr8:30763245              | PPP2CB:miR-9*          |
| rs2241300  | chr8:30973010              | PURG:miR-335           |
| rs2241300  | chr8:30973010              | PURG:miR-506           |
| rs2241300  | chr8:30973010              | PURG:miR-29a           |
| rs2241300  | chr8:30973010              | PURG:miR-29b           |
| rs2241300  | chr8:30973010              | PURG:miR-29c           |
| rs3313     | chr8:38187577              | BAG4:miR-568           |
| rs17182477 | chr8:38389580              | FGFR1:miR-200a*        |
| rs11548610 | chr8:38389779              | FGFR1:miR-545          |
| rs11548610 | chr8:38389779              | FGFR1:miR-559          |
| rs1802270  | chr8:38829378              | TACC1:miR-424          |
| rs4737147  | chr8:40508206              | ZMAT4:miR-379          |
| rs4736958  | chr8:41238654              | SFRP1:miR-140          |
| rs35125180 | chr8:41631638              | ANK1:miR-381           |
| rs3832594  | chr8:41906866              | MYST3:miR-205          |
| rs15329    | chr8:41907625              | MYST3:miR-513          |
| rs1050991  | chr8:41908695              | MYST3:miR-589          |
| rs11558227 | chr8:42382254              | VDAC3:miR-768-5p       |
| rs35705942 | chr8:52895343              | PCMTD1:miR-552         |
| rs11550739 | chr8:55042589              | TCEA1:miR-493-5p       |
| rs11782817 | chr8:57236787              | PLAG1:miR-27a          |
| rs11782817 | chr8:57236787              | PLAG1:miR-27b          |
| rs11782817 | chr8:57236787              | PLAG1:miR-144          |
| rs34715615 | chr8:57237485              | PLAG1:miR-559          |
| rs56820814 | chr8:59222817              | C8orf72:miR-9*         |
| rs61342818 | chr8:65657875              | BHLHB5:miR-655         |
| rs61342818 | chr8:65657875              | BHLHB5:miR-302b*       |
| rs16931326 | chr8:65657887              | BHLHB5:miR-135a        |
| rs16931326 | chr8:65657887              | BHLHB5:miR-135b        |
| rs3750184  | chr8:66679044              | ARMC1:miR-302a*        |
| rs3763513  | chr8:66784346              | MTFR1:miR-216          |
| rs3763513  | chr8:66784346              | MTFR1:miR-452*         |
| rs56198403 | chr8:67249861              | TRIM55:miR-569         |
| rs5892065  | chr8:67708360              | VCPIP1:miR-186         |
| rs35802644 | chr8:67708361              | VCPIP1:miR-186         |
| rs3087714  | chr8:70735558              | SULF1:miR-330          |
| rs60220895 | chr8:71186929              | NCOA2:miR-647          |
| rs60220895 | chr8:71186929              | NCOA2:miR-656          |
| rs8993     | chr8:71648639              | TRAM1:miR-620          |
| rs1043024  | chr8:71648640              | TRAM1:miR-620          |
| rs34541916 | chr8:74866320              | UBE2W:miR-630          |
| rs55709201 | chr8:74866925              | UBE2W:miR-582          |
| rs62508045 | chr8:74867256              | UBE2W:miR-520d*        |
| rs2941477  | chr8:76639225              | HNF4G:miR-323          |
| rs34772424 | chr8:76641293              | HNF4G:miR-591          |
| rs2941484  | chr8:76641323              | HNF4G:miR-568          |
| rs16939381 | chr8:77940674              | ZFH4:miR-653           |
| rs11419240 | chr8:77941251              | ZFH4:miR-548c          |
| rs35892151 | chr8:77941252              | ZFH4:miR-548c          |
| rs17445167 | chr8:77941317              | ZFH4:miR-494           |
| rs1801420  | chr8:79676955              | PKIA:miR-501           |
| rs2467789  | chr8:80839819              | HEY1:miR-577           |

**Supplemental Table 4: SNPs in miRNA target sites based on PITA prediction**

| <b>SNP</b> | <b>SNP Position (hg18)</b> | <b>PITA Prediction</b> |
|------------|----------------------------|------------------------|
| rs62514914 | chr8:80839860              | HEY1:miR-186           |
| rs1042683  | chr8:81111508              | TPD52:miR-140          |
| rs1802745  | chr8:81112861              | TPD52:miR-452          |
| rs408925   | chr8:81596841              | ZBTB10:miR-548c        |
| rs10098288 | chr8:82359513              | FABP5:miR-521          |
| rs10094238 | chr8:85995994              | LOC138046:miR-623      |
| rs10094238 | chr8:85995994              | LOC138046:miR-142-3p   |
| rs4566     | chr8:86548334              | CA3:miR-328            |
| rs58997023 | chr8:87548742              | WWP1:miR-302c*         |
| rs28988888 | chr8:89120872              | MMP16:miR-641          |
| rs28988886 | chr8:89121107              | MMP16:miR-562          |
| rs28988884 | chr8:89121576              | MMP16:miR-539          |
| rs28988882 | chr8:89122356              | MMP16:miR-559          |
| rs62526888 | chr8:91706943              | TMEM64:miR-186         |
| rs3830308  | chr8:92040248              | EFCBP1:miR-186         |
| rs34984375 | chr8:92040255              | EFCBP1:miR-186         |
| rs35868637 | chr8:94813052              | RBM12B:miR-142-5p      |
| rs2924475  | chr8:96009918              | TP53INP1:miR-570       |
| rs60534730 | chr8:97223954              | GDF6:miR-203           |
| rs2449512  | chr8:98807085              | MTDH:miR-539           |
| rs34994236 | chr8:99536851              | STK3:miR-299-5p        |
| rs2446917  | chr8:101214885             | FBXO43:miR-522         |
| rs12542891 | chr8:101338680             | RNF19:miR-518b         |
| rs12542891 | chr8:101338680             | RNF19:miR-518c         |
| rs12542891 | chr8:101338680             | RNF19:miR-518d         |
| rs7834075  | chr8:101339499             | RNF19:miR-613          |
| rs11988199 | chr8:101339620             | RNF19:miR-409-3p       |
| rs11988199 | chr8:101339620             | RNF19:miR-512-3p       |
| rs1062376  | chr8:102000325             | YWHAZ:miR-454-5p       |
| rs4003437  | chr8:102000433             | YWHAZ:miR-452*         |
| rs3921614  | chr8:102001302             | YWHAZ:miR-548c         |
| rs61058951 | chr8:102769800             | NCALD:miR-527          |
| rs14674    | chr8:103335416             | EDD1:miR-642           |
| rs28485929 | chr8:103908275             | AZIN1:miR-605          |
| rs2809     | chr8:103908539             | AZIN1:miR-96           |
| rs2809     | chr8:103908539             | AZIN1:miR-593          |
| rs62527061 | chr8:104480596             | SLC25A32:miR-769-3p    |
| rs61055369 | chr8:105333280             | RIMS2:miR-140          |
| rs34750742 | chr8:105333281             | RIMS2:miR-140          |
| rs34782242 | chr8:105333931             | RIMS2:miR-450          |
| rs34782242 | chr8:105333931             | RIMS2:miR-129          |
| rs34435746 | chr8:105333932             | RIMS2:miR-450          |
| rs34435746 | chr8:105333932             | RIMS2:miR-129          |
| rs1053039  | chr8:106885662             | ZFPM2:miR-142-5p       |
| rs12542906 | chr8:107833970             | OXR1:miR-7             |
| rs1048378  | chr8:110424921             | ENY2:miR-577           |
| rs1045664  | chr8:113304383             | CSMD3:miR-561          |
| rs12681983 | chr8:113304692             | CSMD3:miR-620          |
| rs5894075  | chr8:113304851             | CSMD3:miR-570          |
| rs231153   | chr8:116490610             | TRPS1:miR-552          |
| rs231153   | chr8:116490610             | TRPS1:miR-491          |
| rs56778552 | chr8:116494941             | TRPS1:miR-801          |



**Supplemental Table 4: SNPs in miRNA target sites based on PITA prediction**

| <b>SNP</b> | <b>SNP Position (hg18)</b> | <b>PITA Prediction</b> |
|------------|----------------------------|------------------------|
| rs17297063 | chr8:117927368             | RAD21:miR-374          |
| rs17297063 | chr8:117927368             | RAD21:miR-369-3p       |
| rs11548731 | chr8:117927421             | RAD21:miR-335          |
| rs11548728 | chr8:117927438             | RAD21:miR-424          |
| rs11548728 | chr8:117927438             | RAD21:miR-802          |
| rs14795    | chr8:117927531             | RAD21:miR-625          |
| rs11562692 | chr8:119271149             | SAMD12:miR-571         |
| rs4467962  | chr8:119278394             | SAMD12:miR-142-5p      |
| rs3094022  | chr8:120005337             | TNFRSF11B:miR-568      |
| rs3094022  | chr8:120005337             | TNFRSF11B:miR-19a      |
| rs3094022  | chr8:120005337             | TNFRSF11B:miR-19b      |
| rs11573945 | chr8:120005422             | TNFRSF11B:miR-584      |
| rs11573945 | chr8:120005422             | TNFRSF11B:miR-135a     |
| rs11573945 | chr8:120005422             | TNFRSF11B:miR-135b     |
| rs3134037  | chr8:120005452             | TNFRSF11B:miR-216      |
| rs3134038  | chr8:120005457             | TNFRSF11B:miR-216      |
| rs3094021  | chr8:120005498             | TNFRSF11B:miR-124a     |
| rs1057315  | chr8:122695013             | HAS2:miR-561           |
| rs3802266  | chr8:124054889             | ZHX2:miR-660           |
| rs60966457 | chr8:124330244             | ZHX1:miR-561           |
| rs35738235 | chr8:124895612             | FAM91A1:miR-410        |
| rs17351749 | chr8:124895710             | FAM91A1:miR-183        |
| rs58300080 | chr8:124895776             | FAM91A1:miR-383        |
| rs7017024  | chr8:131136120             | DDEF1:miR-431          |
| rs7017024  | chr8:131136120             | DDEF1:miR-643          |
| rs7016780  | chr8:131136121             | DDEF1:miR-431          |
| rs7016780  | chr8:131136121             | DDEF1:miR-643          |
| rs4736611  | chr8:133927894             | PHF20L1:miR-181b       |
| rs4736611  | chr8:133927894             | PHF20L1:miR-181d       |
| rs62514123 | chr8:133928302             | PHF20L1:miR-483        |
| rs3184618  | chr8:136728608             | KHDRBS3:miR-630        |
| rs59580956 | chr8:136728685             | KHDRBS3:miR-511        |
| rs59580956 | chr8:136728685             | KHDRBS3:miR-187        |
| rs35205542 | chr8:136728912             | KHDRBS3:miR-129        |
| rs41272407 | chr8:141738145             | PTK2:miR-559           |
| rs41305527 | chr8:141738505             | PTK2:miR-221           |
| rs5895799  | chr8:145062072             | PLEC1:miR-124a         |
| rs5895799  | chr8:145062072             | PLEC1:miR-506          |
| rs5895799  | chr8:145062072             | PLEC1:miR-566          |
| rs13263500 | chr8:145719128             | LRRC14:miR-149         |
| rs7048532  | chr9:2183359               | SMARCA2:miR-186        |
| rs7048532  | chr9:2183359               | SMARCA2:miR-335        |
| rs45616134 | chr9:2183437               | SMARCA2:miR-542-3p     |
| rs10967349 | chr9:2644402               | VLDLR:miR-205          |
| rs62534387 | chr9:2794197               | KIAA0020:miR-376a*     |
| rs3174298  | chr9:4696366               | CDC37L1:miR-559        |
| rs35275364 | chr9:5764270               | KIAA1432:miR-200b      |
| rs35275364 | chr9:5764270               | KIAA1432:miR-200c      |
| rs35275364 | chr9:5764270               | KIAA1432:miR-429       |
| rs56225076 | chr9:6001046               | RANBP6:miR-194         |
| rs36108024 | chr9:6497024               | UHRF2:miR-202          |
| rs62536166 | chr9:8304850               | PTPRD:miR-34a          |

**Supplemental Table 4: SNPs in miRNA target sites based on PITA prediction**

| <b>SNP</b> | <b>SNP Position (hg18)</b> | <b>PITA Prediction</b> |
|------------|----------------------------|------------------------|
| rs62536166 | chr9:8304850               | PTPRD:miR-34c          |
| rs62536166 | chr9:8304850               | PTPRD:miR-449          |
| rs62536166 | chr9:8304850               | PTPRD:miR-449b         |
| rs62536166 | chr9:8304850               | PTPRD:miR-148b         |
| rs62536166 | chr9:8304850               | PTPRD:miR-152          |
| rs62536166 | chr9:8304850               | PTPRD:miR-153          |
| rs7027735  | chr9:8305133               | PTPRD:miR-299-5p       |
| rs12340202 | chr9:8306465               | PTPRD:miR-656          |
| rs3215100  | chr9:8307231               | PTPRD:miR-548b         |
| rs3215100  | chr9:8307231               | PTPRD:miR-548c         |
| rs10756453 | chr9:13095959              | MPDZ:miR-569           |
| rs484555   | chr9:14075583              | NFIB:miR-143           |
| rs484555   | chr9:14075583              | NFIB:miR-577           |
| rs3739759  | chr9:14077766              | NFIB:miR-338           |
| rs3739759  | chr9:14077766              | NFIB:miR-770-5p        |
| rs7858     | chr9:14077769              | NFIB:miR-338           |
| rs7858     | chr9:14077769              | NFIB:miR-770-5p        |
| rs3209160  | chr9:14608316              | ZDHHC21:miR-196a       |
| rs3209160  | chr9:14608316              | ZDHHC21:miR-196b       |
| rs41303233 | chr9:15455038              | PSIP1:miR-643          |
| rs11542612 | chr9:15455219              | PSIP1:miR-32           |
| rs3179845  | chr9:16406403              | BNC2:miR-452           |
| rs9407885  | chr9:17786948              | SH3GL2:miR-544         |
| rs11552822 | chr9:21961108              | CDKN2A:miR-517a        |
| rs11552822 | chr9:21961108              | CDKN2A:miR-517c        |
| rs34968276 | chr9:21961109              | CDKN2A:miR-517a        |
| rs34968276 | chr9:21961109              | CDKN2A:miR-517c        |
| rs35009436 | chr9:25667185              | TUSC1:miR-141          |
| rs35009436 | chr9:25667185              | TUSC1:miR-200a         |
| rs35009436 | chr9:25667185              | TUSC1:miR-429          |
| rs13297394 | chr9:32530842              | TOPORS:miR-488         |
| rs34721491 | chr9:32531033              | TOPORS:miR-186         |
| rs11542818 | chr9:33029015              | DNAJA1:miR-584         |
| rs41316007 | chr9:34077782              | WDR40A:miR-320         |
| rs10565742 | chr9:34242474              | UBAP1:miR-522          |
| rs1802446  | chr9:34603855              | DCTN3:miR-185          |
| rs1053447  | chr9:35046679              | VCP:miR-568            |
| rs1053318  | chr9:35046961              | VCP:miR-339            |
| rs35188451 | chr9:35094914              | KIAA1539:miR-650       |
| rs10972766 | chr9:36153089              | C9orf19:miR-489        |
| rs1803192  | chr9:36201812              | CLTA:miR-651           |
| rs1803194  | chr9:36201882              | CLTA:miR-577           |
| rs35533603 | chr9:36326871              | RNF38:miR-568          |
| rs41277099 | chr9:36326952              | RNF38:miR-516-5p       |
| rs41277099 | chr9:36326952              | RNF38:miR-637          |
| rs12347708 | chr9:36667608              | MELK:miR-181b          |
| rs12347708 | chr9:36667608              | MELK:miR-181d          |
| rs41278297 | chr9:37428158              | ZBTB5:miR-29a          |
| rs41278297 | chr9:37428158              | ZBTB5:miR-29b          |
| rs41278297 | chr9:37428158              | ZBTB5:miR-29c          |
| rs2308190  | chr9:37429791              | ZBTB5:miR-532          |
| rs62640004 | chr9:37770747              | EXOSC3:miR-203         |

**Supplemental Table 4: SNPs in miRNA target sites based on PITA prediction**

| <b>SNP</b> | <b>SNP Position (hg18)</b> | <b>PITA Prediction</b> |
|------------|----------------------------|------------------------|
| rs61500043 | chr9:71059718              | TJP2:miR-656           |
| rs41308894 | chr9:71197143              | C9orf61:miR-450        |
| rs41286035 | chr9:72031225              | MAMDC2:miR-7           |
| rs3182600  | chr9:74159224              | ZFAND5:miR-374         |
| rs3182600  | chr9:74159224              | ZFAND5:miR-369-3p      |
| rs1043071  | chr9:74159314              | ZFAND5:miR-510         |
| rs1802350  | chr9:74159338              | ZFAND5:miR-559         |
| rs1043033  | chr9:74159398              | ZFAND5:miR-383         |
| rs1043033  | chr9:74159398              | ZFAND5:let-7a          |
| rs1043033  | chr9:74159398              | ZFAND5:let-7b          |
| rs1043033  | chr9:74159398              | ZFAND5:let-7c          |
| rs1043033  | chr9:74159398              | ZFAND5:let-7d          |
| rs1043033  | chr9:74159398              | ZFAND5:let-7f          |
| rs1043033  | chr9:74159398              | ZFAND5:let-7g          |
| rs1043033  | chr9:74159398              | ZFAND5:let-7i          |
| rs1043033  | chr9:74159398              | ZFAND5:miR-98          |
| rs6715     | chr9:74159402              | ZFAND5:let-7a          |
| rs6715     | chr9:74159402              | ZFAND5:let-7b          |
| rs6715     | chr9:74159402              | ZFAND5:let-7c          |
| rs6715     | chr9:74159402              | ZFAND5:let-7d          |
| rs6715     | chr9:74159402              | ZFAND5:let-7f          |
| rs6715     | chr9:74159402              | ZFAND5:let-7g          |
| rs6715     | chr9:74159402              | ZFAND5:let-7i          |
| rs6715     | chr9:74159402              | ZFAND5:miR-98          |
| rs6715     | chr9:74159402              | ZFAND5:miR-515-3p      |
| rs6715     | chr9:74159402              | ZFAND5:miR-520f        |
| rs1802349  | chr9:74159549              | ZFAND5:miR-488         |
| rs11549115 | chr9:74160058              | ZFAND5:miR-140         |
| rs7872010  | chr9:79189644              | VPS13A:miR-559         |
| rs7872010  | chr9:79189644              | VPS13A:miR-568         |
| rs1132276  | chr9:81530330              | TLE4:miR-622           |
| rs33918432 | chr9:81530406              | TLE4:miR-548b          |
| rs33918432 | chr9:81530406              | TLE4:miR-548c          |
| rs35737418 | chr9:83388541              | TLE1:miR-620           |
| rs11292389 | chr9:85052613              | FRMD3:miR-224          |
| rs12404    | chr9:85466229              | UBQLN1:miR-612         |
| rs11659    | chr9:85466396              | UBQLN1:miR-519a        |
| rs11659    | chr9:85466396              | UBQLN1:miR-519b        |
| rs11659    | chr9:85466396              | UBQLN1:miR-519c        |
| rs11548852 | chr9:85773388              | HNRPK:miR-495          |
| rs3196513  | chr9:85773786              | HNRPK:miR-588          |
| rs56148123 | chr9:87351810              | AGTPBP1:miR-579        |
| rs4440696  | chr9:88093187              | ZCCHC6:miR-187         |
| rs4440696  | chr9:88093187              | ZCCHC6:miR-511         |
| rs3118864  | chr9:89512708              | DAPK1:miR-184          |
| rs11555956 | chr9:90282734              | SPIN:miR-559           |
| rs36046828 | chr9:90282937              | SPIN:miR-653           |
| rs11554135 | chr9:90817902              | SHC3:miR-494           |
| rs11554135 | chr9:90817902              | SHC3:miR-641           |
| rs12519    | chr9:90817902              | SHC3:miR-494           |
| rs12519    | chr9:90817902              | SHC3:miR-641           |
| rs11539615 | chr9:92412046              | DIRAS2:miR-577         |

**Supplemental Table 4: SNPs in miRNA target sites based on PITA prediction**

| <b>SNP</b> | <b>SNP Position (hg18)</b> | <b>PITA Prediction</b> |
|------------|----------------------------|------------------------|
| rs11539615 | chr9:92412046              | DIRAS2:miR-142-5p      |
| rs11541746 | chr9:95366922              | C9orf10:miR-575        |
| rs41274410 | chr9:95366925              | C9orf10:miR-575        |
| rs11975    | chr9:95367512              | C9orf10:miR-580        |
| rs1140722  | chr9:95480149              | PHF2:miR-659           |
| rs11545561 | chr9:96262786              | HIATL1:miR-186         |
| rs17840743 | chr9:96262786              | HIATL1:miR-186         |
| rs36021882 | chr9:98302507              | CDC14B:miR-499         |
| rs11568808 | chr9:100951974             | TGFBR1:miR-582         |
| rs11568809 | chr9:100952457             | TGFBR1:miR-646         |
| rs11568809 | chr9:100952457             | TGFBR1:miR-562         |
| rs41283642 | chr9:100955708             | TGFBR1:miR-142-3p      |
| rs1131340  | chr9:101667136             | NR4A3:miR-181b         |
| rs1131340  | chr9:101667136             | NR4A3:miR-181d         |
| rs1131340  | chr9:101667136             | NR4A3:miR-574          |
| rs41273939 | chr9:101783405             | TXNDC4:miR-802         |
| rs16919211 | chr9:102379661             | TMEFF1:miR-544         |
| rs10649646 | chr9:103126494             | PRG-3:miR-630          |
| rs59819238 | chr9:103126496             | PRG-3:miR-630          |
| rs59311341 | chr9:103163073             | BAAT:miR-19a           |
| rs59311341 | chr9:103163073             | BAAT:miR-19b           |
| rs61261464 | chr9:103163501             | BAAT:miR-186           |
| rs1135370  | chr9:103164329             | BAAT:miR-584           |
| rs59775931 | chr9:103372889             | GRIN3A:miR-600         |
| rs41282161 | chr9:103396221             | PPP3R2:miR-182*        |
| rs3739725  | chr9:103396344             | PPP3R2:miR-765         |
| rs10991377 | chr9:106583197             | ABCA1:miR-382          |
| rs11540325 | chr9:106584811             | ABCA1:miR-575          |
| rs34352903 | chr9:106586218             | ABCA1:miR-641          |
| rs56876158 | chr9:107192606             | SLC44A1:miR-34b        |
| rs56876158 | chr9:107192606             | SLC44A1:miR-650        |
| rs7018714  | chr9:107192642             | SLC44A1:miR-374        |
| rs11330639 | chr9:107576248             | TMEM38B:miR-539        |
| rs58896239 | chr9:107576252             | TMEM38B:miR-539        |
| rs10978241 | chr9:107576689             | TMEM38B:miR-579        |
| rs55713214 | chr9:109132782             | RAD23B:miR-494         |
| rs14705    | chr9:109134188             | RAD23B:miR-186         |
| rs12336214 | chr9:109286965             | KLF4:miR-142-5p        |
| rs12336214 | chr9:109286965             | KLF4:miR-656           |
| rs11550076 | chr9:109287173             | KLF4:miR-32            |
| rs11550076 | chr9:109287173             | KLF4:miR-363           |
| rs45505996 | chr9:109287203             | KLF4:miR-626           |
| rs7023002  | chr9:109287739             | KLF4:miR-591           |
| rs34632045 | chr9:110975146             | EPB41L4B:miR-496       |
| rs60747260 | chr9:111042516             | EPB41L4B:miR-142-5p    |
| rs41278389 | chr9:111043572             | EPB41L4B:miR-580       |
| rs34967113 | chr9:111746242             | PALM2:miR-568          |
| rs4978878  | chr9:111972125             | PALM2-AKAP2:miR-373*   |
| rs4978878  | chr9:111972125             | PALM2-AKAP2:miR-616    |
| rs41278417 | chr9:111974311             | AKAP2:miR-1            |
| rs41278417 | chr9:111974311             | PALM2-AKAP2:miR-1      |
| rs41278417 | chr9:111974311             | PALM2-AKAP2:miR-206    |

**Supplemental Table 4: SNPs in miRNA target sites based on PITA prediction**

| <b>SNP</b> | <b>SNP Position (hg18)</b> | <b>PITA Prediction</b> |
|------------|----------------------------|------------------------|
| rs58477888 | chr9:114671718             | SNX30:miR-634          |
| rs912665   | chr9:114671718             | SNX30:miR-634          |
| rs58477888 | chr9:114671718             | SNX30:miR-548d         |
| rs912665   | chr9:114671718             | SNX30:miR-548d         |
| rs58178966 | chr9:114676878             | SNX30:miR-421          |
| rs58178966 | chr9:114676878             | SNX30:miR-545          |
| rs15076    | chr9:114676879             | SNX30:miR-421          |
| rs15076    | chr9:114676879             | SNX30:miR-545          |
| rs3184777  | chr9:114967695             | FKBP15:miR-583         |
| rs1128147  | chr9:114967698             | FKBP15:miR-583         |
| rs34450094 | chr9:118202211             | PAPPA:miR-196a         |
| rs34450094 | chr9:118202211             | PAPPA:miR-196b         |
| rs34450094 | chr9:118202211             | PAPPA:let-7a           |
| rs34450094 | chr9:118202211             | PAPPA:let-7b           |
| rs34450094 | chr9:118202211             | PAPPA:let-7c           |
| rs34450094 | chr9:118202211             | PAPPA:let-7d           |
| rs34450094 | chr9:118202211             | PAPPA:let-7f           |
| rs34450094 | chr9:118202211             | PAPPA:let-7g           |
| rs34450094 | chr9:118202211             | PAPPA:let-7i           |
| rs34450094 | chr9:118202211             | PAPPA:miR-98           |
| rs34450094 | chr9:118202211             | PAPPA:miR-432          |
| rs56186860 | chr9:123584631             | DAB2IP:miR-642         |
| rs56186860 | chr9:123584631             | DAB2IP:miR-642         |
| rs10568818 | chr9:124006350             | LHX6:miR-135a          |
| rs10568818 | chr9:124006350             | LHX6:miR-135b          |
| rs58532716 | chr9:124006351             | LHX6:miR-135a          |
| rs58532716 | chr9:124006351             | LHX6:miR-135b          |
| rs59695989 | chr9:124905903             | RABGAP1:miR-616        |
| rs10985891 | chr9:124927444             | STRBP:miR-384          |
| rs41274378 | chr9:126324569             | NR6A1:miR-377          |
| rs1110026  | chr9:126324572             | NR6A1:miR-377          |
| rs1110026  | chr9:126324572             | NR6A1:miR-335          |
| rs1064785  | chr9:126324576             | NR6A1:miR-335          |
| rs14622    | chr9:126616878             | OLFML2A:miR-577        |
| rs14622    | chr9:126616878             | OLFML2A:miR-559        |
| rs8975     | chr9:126616908             | OLFML2A:miR-600        |
| rs59019646 | chr9:126679504             | ARPC5L:miR-628         |
| rs3832632  | chr9:126681854             | GOLGA1:miR-190         |
| rs3209735  | chr9:127323573             | MAPKAP1:miR-620        |
| rs11792585 | chr9:127768280             | PBX3:miR-562           |
| rs11792585 | chr9:127768280             | PBX3:miR-142-5p        |
| rs35508948 | chr9:127769189             | PBX3:miR-129           |
| rs12379699 | chr9:128199648             | C9orf28:miR-651        |
| rs57760288 | chr9:128305606             | C9orf28:miR-558        |
| rs10339    | chr9:128889551             | ANGPTL2:miR-496        |
| rs35150575 | chr9:129021576             | RALGPS1:miR-641        |
| rs57440312 | chr9:129024917             | RALGPS1:miR-539        |
| rs55850849 | chr9:129195519             | GARNL3:miR-183         |
| rs55850849 | chr9:129195519             | GARNL3:miR-652         |
| rs1132847  | chr9:129307483             | C9orf88:miR-648        |
| rs56802879 | chr9:129534766             | TOR2A:miR-594          |
| rs1042320  | chr9:129616079             | FPGS:miR-524           |

**Supplemental Table 4: SNPs in miRNA target sites based on PITA prediction**

| <b>SNP</b> | <b>SNP Position (hg18)</b> | <b>PITA Prediction</b> |
|------------|----------------------------|------------------------|
| rs1042320  | chr9:129616079             | FPGS:miR-525*          |
| rs3192738  | chr9:130296868             | ODF2:miR-583           |
| rs56234711 | chr9:130496858             | SET:miR-625            |
| rs10988093 | chr9:130496946             | SET:miR-630            |
| rs1061240  | chr9:130497076             | SET:miR-658            |
| rs10988095 | chr9:130497167             | SET:miR-326            |
| rs10988096 | chr9:130497169             | SET:miR-326            |
| rs60244041 | chr9:130612480             | TBC1D13:miR-345        |
| rs60244041 | chr9:130612480             | TBC1D13:miR-101        |
| rs60244041 | chr9:130612480             | TBC1D13:miR-15a        |
| rs60244041 | chr9:130612480             | TBC1D13:miR-15b        |
| rs60244041 | chr9:130612480             | TBC1D13:miR-16         |
| rs60244041 | chr9:130612480             | TBC1D13:miR-195        |
| rs60244041 | chr9:130612480             | TBC1D13:miR-497        |
| rs55985529 | chr9:130624470             | C9orf114:miR-154       |
| rs12342339 | chr9:130892321             | DOLPP1:miR-506         |
| rs11482915 | chr9:132035722             | FREQ:miR-568           |
| rs12552647 | chr9:132503356             | FUBP3:miR-613          |
| rs12552647 | chr9:132503356             | FUBP3:miR-191          |
| rs2027386  | chr9:132548103             | PRDM12:miR-656         |
| rs58954685 | chr9:134756994             | TSC1:miR-31            |
| rs58954685 | chr9:134756994             | TSC1:miR-520g          |
| rs58954685 | chr9:134756994             | TSC1:miR-520h          |
| rs17151353 | chr9:135888406             | BRD3:miR-656           |
| rs433402   | chr9:135888448             | BRD3:let-7a            |
| rs433402   | chr9:135888448             | BRD3:let-7b            |
| rs433402   | chr9:135888448             | BRD3:let-7c            |
| rs433402   | chr9:135888448             | BRD3:let-7d            |
| rs433402   | chr9:135888448             | BRD3:let-7f            |
| rs433402   | chr9:135888448             | BRD3:let-7g            |
| rs433402   | chr9:135888448             | BRD3:let-7i            |
| rs433402   | chr9:135888448             | BRD3:miR-98            |
| rs34439674 | chr9:136472222             | RXRA:miR-574           |
| rs56031840 | chr9:136876399             | COL5A1:miR-582         |
| rs3128575  | chr9:136876471             | COL5A1:miR-126*        |
| rs34883129 | chr9:137129671             | OLFM1:miR-586          |
| rs34883129 | chr9:137129671             | OLFM1:miR-519a         |
| rs34883129 | chr9:137129671             | OLFM1:miR-519b         |
| rs34883129 | chr9:137129671             | OLFM1:miR-519c         |
| rs13293894 | chr9:137129751             | OLFM1:miR-223          |
| rs13286076 | chr9:137129762             | OLFM1:miR-493-3p       |
| rs34512090 | chr9:137519996             | KIAA0649:miR-520d*     |
| rs3780189  | chr9:138238037             | QSOX2:miR-656          |
| rs3903141  | chr9:139257969             | TUBB2C:miR-302a        |
| rs3903141  | chr9:139257969             | TUBB2C:miR-302b        |
| rs3903141  | chr9:139257969             | TUBB2C:miR-302c        |
| rs3903141  | chr9:139257969             | TUBB2C:miR-302d        |
| rs3903141  | chr9:139257969             | TUBB2C:miR-373         |
| rs3903141  | chr9:139257969             | TUBB2C:miR-520a        |
| rs3903141  | chr9:139257969             | TUBB2C:miR-520b        |
| rs3903141  | chr9:139257969             | TUBB2C:miR-520c        |
| rs3903141  | chr9:139257969             | TUBB2C:miR-520d        |

**Supplemental Table 4: SNPs in miRNA target sites based on PITA prediction**

| <b>SNP</b> | <b>SNP Position (hg18)</b> | <b>PITA Prediction</b> |
|------------|----------------------------|------------------------|
| rs3903141  | chr9:139257969             | TUBB2C:miR-520e        |
| rs3903141  | chr9:139257969             | TUBB2C:miR-526b*       |
| rs3903141  | chr9:139257969             | TUBB2C:miR-106a        |
| rs3903141  | chr9:139257969             | TUBB2C:miR-106b        |
| rs3903141  | chr9:139257969             | TUBB2C:miR-17-5p       |
| rs3903141  | chr9:139257969             | TUBB2C:miR-20a         |
| rs3903141  | chr9:139257969             | TUBB2C:miR-20b         |
| rs3903141  | chr9:139257969             | TUBB2C:miR-580         |
| rs17158753 | chr10:313034               | DIP2C:miR-650          |
| rs17293531 | chr10:848207               | LARP5:miR-485-5p       |
| rs34248524 | chr10:1165477              | WDR37:miR-577          |
| rs34248524 | chr10:1165477              | WDR37:miR-381          |
| rs11250281 | chr10:1165894              | WDR37:miR-384          |
| rs11544693 | chr10:3811528              | KLF6:miR-409-5p        |
| rs60106768 | chr10:3811549              | KLF6:miR-767-5p        |
| rs10527882 | chr10:5192142              | AKR1CL1:miR-581        |
| rs10705866 | chr10:5192144              | AKR1CL1:miR-581        |
| rs12838    | chr10:5847890              | GDI2:miR-524*          |
| rs12838    | chr10:5847890              | GDI2:miR-335           |
| rs3838748  | chr10:6198818              | RBM17:miR-142-5p       |
| rs3839918  | chr10:8156247              | GATA3:miR-101          |
| rs34211650 | chr10:11412841             | CUGBP2:let-7a          |
| rs34211650 | chr10:11412841             | CUGBP2:let-7b          |
| rs34211650 | chr10:11412841             | CUGBP2:let-7c          |
| rs34211650 | chr10:11412841             | CUGBP2:let-7d          |
| rs34211650 | chr10:11412841             | CUGBP2:let-7f          |
| rs34211650 | chr10:11412841             | CUGBP2:let-7g          |
| rs34211650 | chr10:11412841             | CUGBP2:let-7i          |
| rs34211650 | chr10:11412841             | CUGBP2:miR-98          |
| rs1802475  | chr10:11415412             | CUGBP2:miR-576         |
| rs17454839 | chr10:11415665             | CUGBP2:miR-522         |
| rs34057408 | chr10:11542570             | USP6NL:miR-577         |
| rs61048750 | chr10:11542657             | USP6NL:miR-568         |
| rs3057294  | chr10:11542660             | USP6NL:miR-568         |
| rs3057294  | chr10:11542660             | USP6NL:miR-548c        |
| rs34036377 | chr10:12002566             | UPF2:miR-138           |
| rs61846677 | chr10:12003143             | UPF2:miR-485-5p        |
| rs61846677 | chr10:12003143             | UPF2:miR-138           |
| rs28422123 | chr10:13400139             | SEPHS1:miR-182         |
| rs2650     | chr10:13400176             | SEPHS1:miR-595         |
| rs2650     | chr10:13400176             | SEPHS1:miR-648         |
| rs28410783 | chr10:13400231             | SEPHS1:miR-646         |
| rs28711667 | chr10:13400271             | SEPHS1:miR-568         |
| rs60843570 | chr10:13725760             | FRMD4A:miR-450         |
| rs60843570 | chr10:13725760             | FRMD4A:miR-31          |
| rs41301095 | chr10:13726141             | FRMD4A:miR-448         |
| rs1132513  | chr10:14600583             | FAM107B:miR-140        |
| rs1054657  | chr10:15189986             | NMT2:miR-368           |
| rs17156419 | chr10:15294578             | C10orf38:miR-384       |
| rs11346426 | chr10:16594323             | PTER:miR-143           |
| rs4747277  | chr10:16595808             | C1QL3:miR-487b         |
| rs9235     | chr10:17319405             | VIM:miR-590            |

**Supplemental Table 4: SNPs in miRNA target sites based on PITA prediction**

| <b>SNP</b> | <b>SNP Position (hg18)</b> | <b>PITA Prediction</b> |
|------------|----------------------------|------------------------|
| rs59058506 | chr10:17672346             | PTPLA:miR-506          |
| rs1046802  | chr10:18869253             | CACNB2:miR-609         |
| rs4748484  | chr10:18869267             | CACNB2:miR-656         |
| rs4748485  | chr10:18869268             | CACNB2:miR-656         |
| rs5783610  | chr10:18869963             | CACNB2:miR-302b*       |
| rs35051239 | chr10:18869964             | CACNB2:miR-302b*       |
| rs5783611  | chr10:18869987             | CACNB2:miR-30a-5p      |
| rs5783611  | chr10:18869987             | CACNB2:miR-30b         |
| rs5783611  | chr10:18869987             | CACNB2:miR-30c         |
| rs5783611  | chr10:18869987             | CACNB2:miR-30d         |
| rs5783611  | chr10:18869987             | CACNB2:miR-30e-5p      |
| rs33980121 | chr10:18869988             | CACNB2:miR-30a-5p      |
| rs33980121 | chr10:18869988             | CACNB2:miR-30b         |
| rs33980121 | chr10:18869988             | CACNB2:miR-30c         |
| rs33980121 | chr10:18869988             | CACNB2:miR-30d         |
| rs33980121 | chr10:18869988             | CACNB2:miR-30e-5p      |
| rs16921055 | chr10:21110991             | NEBL:miR-568           |
| rs11556881 | chr10:21111147             | NEBL:miR-142-5p        |
| rs1062671  | chr10:21112138             | NEBL:miR-183           |
| rs12360168 | chr10:21842580             | FLJ45187:miR-19a       |
| rs12360168 | chr10:21842580             | FLJ45187:miR-19b       |
| rs41304595 | chr10:22864594             | PIP4K2A:miR-135a       |
| rs41304595 | chr10:22864594             | PIP4K2A:miR-135b       |
| rs1127941  | chr10:24912575             | ARHGAP21:miR-199a      |
| rs1127941  | chr10:24912575             | ARHGAP21:miR-199b      |
| rs3184313  | chr10:24912974             | ARHGAP21:miR-183       |
| rs3184313  | chr10:24912974             | ARHGAP21:miR-652       |
| rs3184310  | chr10:24912983             | ARHGAP21:miR-548d      |
| rs1127901  | chr10:24913117             | ARHGAP21:miR-532       |
| rs41279904 | chr10:25930692             | GPR158:miR-758         |
| rs3758451  | chr10:25930864             | GPR158:miR-561         |
| rs8190821  | chr10:26633450             | GAD2:miR-577           |
| rs1803070  | chr10:27077027             | ABI1:miR-655           |
| rs11552011 | chr10:27077060             | ABI1:miR-495           |
| rs9833     | chr10:27440867             | YME1L1:miR-581         |
| rs16928140 | chr10:28002030             | IRXL1:miR-424          |
| rs11549391 | chr10:29011461             | BAMBI:miR-452          |
| rs12411558 | chr10:29011521             | BAMBI:miR-655          |
| rs12411558 | chr10:29011521             | BAMBI:miR-369-3p       |
| rs5784080  | chr10:29011532             | BAMBI:miR-559          |
| rs55992850 | chr10:29011535             | BAMBI:miR-559          |
| rs35579124 | chr10:30790386             | MAP3K8:miR-203         |
| rs35579124 | chr10:30790386             | MAP3K8:miR-144         |
| rs59203025 | chr10:31856614             | ZEB1:miR-629           |
| rs1044795  | chr10:32135255             | ARHGAP12:miR-584       |
| rs10826997 | chr10:32136010             | ARHGAP12:miR-628       |
| rs1056356  | chr10:32340150             | KIF5B:miR-582          |
| rs17576669 | chr10:33229663             | ITGB1:miR-542-3p       |
| rs11553561 | chr10:33507085             | NRP1:miR-145           |
| rs2506144  | chr10:33508462             | NRP1:miR-323           |
| rs15460    | chr10:35338918             | CUL2:miR-651           |
| rs1131510  | chr10:35339091             | CUL2:miR-574           |



**Supplemental Table 4: SNPs in miRNA target sites based on PITA prediction**

| <b>SNP</b> | <b>SNP Position (hg18)</b> | <b>PITA Prediction</b> |
|------------|----------------------------|------------------------|
| rs34148312 | chr10:35540593             | CREM:miR-516-3p        |
| rs2435355  | chr10:42944839             | RET:miR-602            |
| rs28516711 | chr10:46380118             | SYT15:miR-654          |
| rs59292693 | chr10:46380675             | SYT15:miR-485-5p       |
| rs59292693 | chr10:46380675             | SYT15:let-7e           |
| rs3120443  | chr10:46380905             | SYT15:miR-340          |
| rs11324995 | chr10:46380927             | SYT15:miR-577          |
| rs4253074  | chr10:50393323             | PGBD3:miR-606          |
| rs7084674  | chr10:59798813             | UBE2D1:miR-33          |
| rs2893808  | chr10:61081698             | SLC16A9:miR-191        |
| rs35537819 | chr10:61221122             | CCDC6:miR-499          |
| rs34992845 | chr10:61221124             | CCDC6:miR-499          |
| rs1063825  | chr10:61222284             | CCDC6:miR-24           |
| rs11593747 | chr10:61222392             | CCDC6:miR-32           |
| rs11593747 | chr10:61222392             | CCDC6:miR-363          |
| rs10994151 | chr10:61459341             | ANK3:miR-135a          |
| rs10994151 | chr10:61459341             | ANK3:miR-135b          |
| rs10994151 | chr10:61459341             | ANK3:miR-578           |
| rs10994151 | chr10:61459341             | ANK3:miR-643           |
| rs7088302  | chr10:63626704             | PLEKHK1:miR-597        |
| rs11325764 | chr10:64242044             | EGR2:miR-140           |
| rs1042413  | chr10:64242377             | EGR2:miR-374           |
| rs34971101 | chr10:64242523             | EGR2:miR-223           |
| rs1042410  | chr10:64242530             | EGR2:miR-511           |
| rs2539     | chr10:64584533             | NRBF2:miR-154          |
| rs2539     | chr10:64584533             | NRBF2:miR-453          |
| rs15871    | chr10:65050784             | REEP3:miR-577          |
| rs34131426 | chr10:65051408             | REEP3:miR-522          |
| rs59457804 | chr10:69346428             | SIRT1:miR-30a-5p       |
| rs59457804 | chr10:69346428             | SIRT1:miR-30b          |
| rs59457804 | chr10:69346428             | SIRT1:miR-30c          |
| rs59457804 | chr10:69346428             | SIRT1:miR-30d          |
| rs59457804 | chr10:69346428             | SIRT1:miR-30e-5p       |
| rs4746720  | chr10:69346836             | SIRT1:miR-561          |
| rs35094409 | chr10:69347773             | SIRT1:miR-609          |
| rs35791720 | chr10:69348061             | SIRT1:miR-768-5p       |
| rs1673     | chr10:69641338             | MYPN:miR-651           |
| rs1162756  | chr10:69772942             | HNRPH3:miR-128a        |
| rs1162756  | chr10:69772942             | HNRPH3:miR-128b        |
| rs7898773  | chr10:70221054             | CCAR1:miR-29a          |
| rs7898773  | chr10:70221054             | CCAR1:miR-29b          |
| rs7898773  | chr10:70221054             | CCAR1:miR-29c          |
| rs13376784 | chr10:70601175             | VPS26A:miR-372         |
| rs13376784 | chr10:70601175             | VPS26A:miR-93          |
| rs1472821  | chr10:70601232             | VPS26A:miR-518a        |
| rs1472821  | chr10:70601232             | VPS26A:miR-518e        |
| rs1472821  | chr10:70601232             | VPS26A:miR-518f        |
| rs1472821  | chr10:70601232             | VPS26A:miR-518b        |
| rs1472821  | chr10:70601232             | VPS26A:miR-518c        |
| rs1472821  | chr10:70601232             | VPS26A:miR-518d        |
| rs14578    | chr10:70602515             | VPS26A:miR-19a         |
| rs14578    | chr10:70602515             | VPS26A:miR-19b         |

**Supplemental Table 4: SNPs in miRNA target sites based on PITA prediction**

| <b>SNP</b> | <b>SNP Position (hg18)</b> | <b>PITA Prediction</b> |
|------------|----------------------------|------------------------|
| rs10740336 | chr10:71731085             | LRRC20:miR-623         |
| rs10740336 | chr10:71731085             | LRRC20:miR-502         |
| rs3034645  | chr10:71998174             | KIAA1274:miR-568       |
| rs10390    | chr10:73246110             | PSAP:miR-589           |
| rs11555022 | chr10:73246110             | PSAP:miR-589           |
| rs59472992 | chr10:73488910             | SPOCK2:miR-425-5p      |
| rs60489647 | chr10:74867165             | PPP3CB:miR-31          |
| rs41306522 | chr10:74867925             | PPP3CB:miR-223         |
| rs34869528 | chr10:74867978             | PPP3CB:miR-299-3p      |
| rs16930885 | chr10:75201860             | SEC24C:miR-185         |
| rs11817848 | chr10:75201871             | SEC24C:miR-559         |
| rs12569766 | chr10:75231496             | KIAA0913:miR-365       |
| rs13013    | chr10:75232167             | NDST2:miR-492          |
| rs11539661 | chr10:75242427             | CAMK2G:miR-140         |
| rs2384389  | chr10:75243278             | CAMK2G:miR-658         |
| rs2306327  | chr10:75243784             | CAMK2G:miR-384         |
| rs36124091 | chr10:75548974             | VCL:miR-187            |
| rs12263058 | chr10:76461040             | MYST4:miR-568          |
| rs41305010 | chr10:76461521             | MYST4:miR-515-5p       |
| rs41305010 | chr10:76461521             | MYST4:miR-519e*        |
| rs35536583 | chr10:76524502             | DUSP13:miR-661         |
| rs3088142  | chr10:76524570             | DUSP13:miR-600         |
| rs1804198  | chr10:76660944             | VDAC2:miR-103          |
| rs1804198  | chr10:76660944             | VDAC2:miR-107          |
| rs1259502  | chr10:76661106             | VDAC2:miR-340          |
| rs57460907 | chr10:78299789             | KCNMA1:miR-599         |
| rs57460907 | chr10:78299789             | KCNMA1:miR-594         |
| rs964      | chr10:79220633             | DLG5:miR-605           |
| rs34373184 | chr10:79221868             | DLG5:miR-105           |
| rs16937126 | chr10:80812952             | C10orf56:miR-335       |
| rs58896019 | chr10:82396215             | SH2D4B:miR-452         |
| rs17107469 | chr10:82396227             | SH2D4B:miR-199a*       |
| rs12783710 | chr10:82396254             | SH2D4B:miR-143         |
| rs11550183 | chr10:85902165             | GHITM:miR-558          |
| rs34683871 | chr10:88185931             | WAPAL:miR-381          |
| rs34285032 | chr10:88186154             | WAPAL:miR-369-3p       |
| rs10639405 | chr10:88186155             | WAPAL:miR-369-3p       |
| rs33920563 | chr10:88186156             | WAPAL:miR-369-3p       |
| rs7069799  | chr10:88187157             | WAPAL:miR-548c         |
| rs45601731 | chr10:88482886             | LDB3:miR-19a           |
| rs45601731 | chr10:88482886             | LDB3:miR-19b           |
| rs35222021 | chr10:88484613             | LDB3:miR-191           |
| rs11202142 | chr10:88485614             | LDB3:miR-320           |
| rs11202142 | chr10:88485614             | LDB3:miR-9*            |
| rs3895069  | chr10:89715434             | PTEN:miR-202           |
| rs1044492  | chr10:89715712             | PTEN:miR-136           |
| rs1530281  | chr10:90673104             | STAMBPL1:miR-648       |
| rs3832648  | chr10:92491648             | HTR7:miR-10a           |
| rs3832648  | chr10:92491648             | HTR7:miR-10b           |
| rs56288532 | chr10:92491653             | HTR7:miR-10a           |
| rs56288532 | chr10:92491653             | HTR7:miR-10b           |
| rs57675875 | chr10:92491841             | HTR7:miR-544           |

**Supplemental Table 4: SNPs in miRNA target sites based on PITA prediction**

| <b>SNP</b> | <b>SNP Position (hg18)</b> | <b>PITA Prediction</b> |
|------------|----------------------------|------------------------|
| rs11186355 | chr10:92651039             | RPP30:miR-28           |
| rs11541126 | chr10:93033831             | PCGF5:miR-577          |
| rs11541126 | chr10:93033831             | PCGF5:miR-559          |
| rs58530579 | chr10:93263813             | HECTD2:miR-34a         |
| rs58530579 | chr10:93263813             | HECTD2:miR-34c         |
| rs58530579 | chr10:93263813             | HECTD2:miR-449         |
| rs58530579 | chr10:93263813             | HECTD2:miR-449b        |
| rs58530579 | chr10:93263813             | HECTD2:miR-34b         |
| rs11186597 | chr10:93264351             | HECTD2:miR-609         |
| rs45556637 | chr10:93800792             | CPEB3:miR-520g         |
| rs45556637 | chr10:93800792             | CPEB3:miR-520h         |
| rs45556637 | chr10:93800792             | CPEB3:miR-106a         |
| rs45556637 | chr10:93800792             | CPEB3:miR-106b         |
| rs45556637 | chr10:93800792             | CPEB3:miR-17-5p        |
| rs45556637 | chr10:93800792             | CPEB3:miR-20a          |
| rs45556637 | chr10:93800792             | CPEB3:miR-20b          |
| rs45556637 | chr10:93800792             | CPEB3:miR-302a         |
| rs45556637 | chr10:93800792             | CPEB3:miR-302b         |
| rs45556637 | chr10:93800792             | CPEB3:miR-302c         |
| rs45556637 | chr10:93800792             | CPEB3:miR-302d         |
| rs45556637 | chr10:93800792             | CPEB3:miR-373          |
| rs45556637 | chr10:93800792             | CPEB3:miR-520a         |
| rs45556637 | chr10:93800792             | CPEB3:miR-520b         |
| rs45556637 | chr10:93800792             | CPEB3:miR-520c         |
| rs45556637 | chr10:93800792             | CPEB3:miR-520d         |
| rs45556637 | chr10:93800792             | CPEB3:miR-520e         |
| rs45556637 | chr10:93800792             | CPEB3:miR-526b*        |
| rs17107567 | chr10:94101781             | MARCH5:miR-501         |
| rs34266748 | chr10:94203768             | IDE:miR-382            |
| rs3814155  | chr10:97062308             | SORBS1:miR-577         |
| rs3181116  | chr10:97617647             | ENTPD1:miR-587         |
| rs35222583 | chr10:98114457             | TLL2:miR-32            |
| rs12263129 | chr10:98271682             | SMBP:miR-105           |
| rs12263129 | chr10:98271682             | SMBP:miR-302a          |
| rs12263129 | chr10:98271682             | SMBP:miR-302b          |
| rs12263129 | chr10:98271682             | SMBP:miR-302c          |
| rs12263129 | chr10:98271682             | SMBP:miR-302d          |
| rs12263129 | chr10:98271682             | SMBP:miR-373           |
| rs12263129 | chr10:98271682             | SMBP:miR-520a          |
| rs12263129 | chr10:98271682             | SMBP:miR-520b          |
| rs12263129 | chr10:98271682             | SMBP:miR-520c          |
| rs12263129 | chr10:98271682             | SMBP:miR-520d          |
| rs12263129 | chr10:98271682             | SMBP:miR-520e          |
| rs12263129 | chr10:98271682             | SMBP:miR-526b*         |
| rs3740518  | chr10:99082362             | FRAT2:miR-768-5p       |
| rs2861951  | chr10:99183154             | PGAM1:miR-583          |
| rs28364829 | chr10:99423528             | PI4KII:miR-629         |
| rs1046249  | chr10:99425720             | PI4KII:miR-425-5p      |
| rs11592057 | chr10:101142181            | CNNM1:miR-635          |
| rs11592057 | chr10:101142181            | CNNM1:miR-380-5p       |
| rs1802213  | chr10:101462244            | COX15:miR-338          |
| rs11557932 | chr10:102114194            | SCD:miR-302a           |

**Supplemental Table 4: SNPs in miRNA target sites based on PITA prediction**

| <b>SNP</b> | <b>SNP Position (hg18)</b> | <b>PITA Prediction</b> |
|------------|----------------------------|------------------------|
| rs11557932 | chr10:102114194            | SCD:miR-302b           |
| rs11557932 | chr10:102114194            | SCD:miR-302c           |
| rs11557932 | chr10:102114194            | SCD:miR-302d           |
| rs11557932 | chr10:102114194            | SCD:miR-373            |
| rs11557932 | chr10:102114194            | SCD:miR-520a           |
| rs11557932 | chr10:102114194            | SCD:miR-520b           |
| rs11557932 | chr10:102114194            | SCD:miR-520c           |
| rs11557932 | chr10:102114194            | SCD:miR-520d           |
| rs11557932 | chr10:102114194            | SCD:miR-520e           |
| rs11557932 | chr10:102114194            | SCD:miR-526b*          |
| rs11557932 | chr10:102114194            | SCD:miR-106a           |
| rs11557932 | chr10:102114194            | SCD:miR-106b           |
| rs11557932 | chr10:102114194            | SCD:miR-17-5p          |
| rs11557932 | chr10:102114194            | SCD:miR-20a            |
| rs11557932 | chr10:102114194            | SCD:miR-20b            |
| rs11557932 | chr10:102114194            | SCD:miR-520g           |
| rs11557932 | chr10:102114194            | SCD:miR-520h           |
| rs11557932 | chr10:102114194            | SCD:miR-373*           |
| rs15019    | chr10:102114197            | SCD:miR-373*           |
| rs11557931 | chr10:102114212            | SCD:miR-578            |
| rs1135170  | chr10:102578873            | PAX2:miR-368           |
| rs11190719 | chr10:102579324            | PAX2:miR-642           |
| rs11190773 | chr10:102712418            | C10orf6:miR-199a       |
| rs11190773 | chr10:102712418            | C10orf6:miR-199b       |
| rs34928771 | chr10:102712639            | C10orf6:miR-130a       |
| rs34928771 | chr10:102712639            | C10orf6:miR-130b       |
| rs34928771 | chr10:102712639            | C10orf6:miR-301        |
| rs34928771 | chr10:102712639            | C10orf6:miR-454-3p     |
| rs11190774 | chr10:102714851            | C10orf6:miR-633        |
| rs60622673 | chr10:102714851            | C10orf6:miR-633        |
| rs722435   | chr10:102735052            | SEMA4G:miR-125a        |
| rs722435   | chr10:102735052            | SEMA4G:miR-125b        |
| rs722435   | chr10:102735052            | SEMA4G:miR-149         |
| rs35875591 | chr10:103303947            | BTRC:miR-32            |
| rs2028926  | chr10:103597094            | C10orf76:miR-154       |
| rs2028926  | chr10:103597094            | C10orf76:miR-219       |
| rs17847381 | chr10:103899933            | PPRC1:miR-548c         |
| rs11558772 | chr10:104132476            | GBF1:miR-768-5p        |
| rs11558772 | chr10:104132476            | GBF1:miR-146a          |
| rs11558772 | chr10:104132476            | GBF1:miR-146b          |
| rs11551830 | chr10:104383038            | SUFU:miR-548c          |
| rs3184159  | chr10:104565974            | C10orf26:miR-27a       |
| rs3184159  | chr10:104565974            | C10orf26:miR-27b       |
| rs57707166 | chr10:105138640            | TAF5:miR-595           |
| rs59729564 | chr10:108324167            | SORCS1:miR-507         |
| rs59729564 | chr10:108324167            | SORCS1:miR-500         |
| rs34154255 | chr10:108326704            | SORCS1:miR-383         |
| rs16448    | chr10:112034833            | MXI1:miR-583           |
| rs14401    | chr10:112035161            | MXI1:miR-579           |
| rs5787845  | chr10:112035935            | MXI1:miR-422a          |
| rs2233938  | chr10:112043876            | SMNDC1:miR-143         |
| rs5787876  | chr10:112647907            | PDCD4:miR-581          |

**Supplemental Table 4: SNPs in miRNA target sites based on PITA prediction**

| <b>SNP</b> | <b>SNP Position (hg18)</b> | <b>PITA Prediction</b> |
|------------|----------------------------|------------------------|
| rs13306145 | chr10:112829989            | ADRA2A:miR-135a        |
| rs13306145 | chr10:112829989            | ADRA2A:miR-135b        |
| rs2290963  | chr10:114180281            | ZDHHC6:miR-600         |
| rs2290964  | chr10:114180282            | ZDHHC6:miR-600         |
| rs238739   | chr10:115795379            | ADRB1:miR-30a-5p       |
| rs238739   | chr10:115795379            | ADRB1:miR-30b          |
| rs238739   | chr10:115795379            | ADRB1:miR-30c          |
| rs238739   | chr10:115795379            | ADRB1:miR-30d          |
| rs238739   | chr10:115795379            | ADRB1:miR-30e-5p       |
| rs17875447 | chr10:115796488            | ADRB1:miR-548c         |
| rs17875447 | chr10:115796488            | ADRB1:miR-577          |
| rs17875447 | chr10:115796488            | ADRB1:miR-559          |
| rs35807494 | chr10:115873510            | C10orf118:miR-141      |
| rs35807494 | chr10:115873510            | C10orf118:miR-200a     |
| rs35807494 | chr10:115873510            | C10orf118:miR-429      |
| rs12243048 | chr10:117695973            | ATRNL1:miR-361         |
| rs886981   | chr10:117813810            | GFRA1:miR-151          |
| rs1052959  | chr10:117813861            | GFRA1:miR-511          |
| rs41284400 | chr10:119755562            | RAB11FIP2:miR-424      |
| rs14085    | chr10:121579566            | C10orf119:miR-30a-5p   |
| rs14085    | chr10:121579566            | C10orf119:miR-30b      |
| rs14085    | chr10:121579566            | C10orf119:miR-30c      |
| rs14085    | chr10:121579566            | C10orf119:miR-30d      |
| rs14085    | chr10:121579566            | C10orf119:miR-30e-5p   |
| rs41294351 | chr10:123228892            | FGFR2:miR-181b         |
| rs41294351 | chr10:123228892            | FGFR2:miR-181d         |
| rs41294349 | chr10:123228976            | FGFR2:miR-338          |
| rs41294349 | chr10:123228976            | FGFR2:miR-770-5p       |
| rs3135825  | chr10:123229040            | FGFR2:miR-126*         |
| rs3763763  | chr10:124003594            | TACC2:miR-363          |
| rs3802703  | chr10:126298673            | FAM53B:miR-520d*       |
| rs1058510  | chr10:126667068            | CTBP2:miR-455          |
| rs1058498  | chr10:126667192            | CTBP2:miR-655          |
| rs35684967 | chr10:126667457            | CTBP2:miR-129          |
| rs58739132 | chr10:126667457            | CTBP2:miR-129          |
| rs7918847  | chr10:129773946            | PTPRE:miR-656          |
| rs11422191 | chr10:131524852            | EBF3:miR-373*          |
| rs11422191 | chr10:131524852            | EBF3:miR-559           |
| rs11422191 | chr10:131524852            | EBF3:miR-577           |
| rs33925059 | chr10:131524853            | EBF3:miR-559           |
| rs33925059 | chr10:131524853            | EBF3:miR-577           |
| rs11390227 | chr10:131524855            | EBF3:miR-559           |
| rs11390227 | chr10:131524855            | EBF3:miR-577           |
| rs34059138 | chr10:131524856            | EBF3:miR-577           |
| rs34107887 | chr10:131525672            | EBF3:miR-30a-3p        |
| rs34107887 | chr10:131525672            | EBF3:miR-30e-3p        |
| rs34107887 | chr10:131525672            | EBF3:miR-145           |
| rs35382542 | chr10:134445745            | INPP5A:miR-548d        |
| rs34343982 | chr10:134445746            | INPP5A:miR-548d        |
| rs1050401  | chr11:754964               | TALDO1:miR-383         |
| rs10798    | chr11:2826741              | KCNQ1:miR-23a          |
| rs10798    | chr11:2826741              | KCNQ1:miR-23b          |

**Supplemental Table 4: SNPs in miRNA target sites based on PITA prediction**

| <b>SNP</b> | <b>SNP Position (hg18)</b> | <b>PITA Prediction</b> |
|------------|----------------------------|------------------------|
| rs1052593  | chr11:2861449              | CDKN1C:miR-129         |
| rs13563    | chr11:2861576              | CDKN1C:miR-153         |
| rs1050554  | chr11:2922281              | NAP1L4:miR-568         |
| rs36088476 | chr11:3690010              | NUP98:miR-32           |
| rs3177020  | chr11:4116675              | RRM1:miR-613           |
| rs2723636  | chr11:6426633              | TRIM3:miR-484          |
| rs1802921  | chr11:6454460              | ARFIP2:miR-204         |
| rs1802921  | chr11:6454460              | ARFIP2:miR-211         |
| rs1802923  | chr11:6454502              | ARFIP2:miR-368         |
| rs1802923  | chr11:6454502              | ARFIP2:miR-765         |
| rs2555171  | chr11:6592213              | TPP1:miR-103           |
| rs2555171  | chr11:6592213              | TPP1:miR-107           |
| rs4586135  | chr11:7444751              | SYT9:miR-185           |
| rs3282     | chr11:7446737              | SYT9:miR-767-3p        |
| rs5789521  | chr11:7446786              | SYT9:miR-650           |
| rs1055233  | chr11:8084071              | TUB:miR-320            |
| rs1055233  | chr11:8084071              | TUB:miR-548a           |
| rs1055233  | chr11:8084071              | TUB:miR-146a           |
| rs1055233  | chr11:8084071              | TUB:miR-146b           |
| rs35044261 | chr11:8925455              | TMEM9B:miR-583         |
| rs35440828 | chr11:10285319             | ADM:miR-144            |
| rs4698     | chr11:10285343             | ADM:miR-181b           |
| rs4698     | chr11:10285343             | ADM:miR-181d           |
| rs56724376 | chr11:10490277             | RNF141:miR-656         |
| rs11929    | chr11:10775409             | EIF4G2:miR-484         |
| rs63659660 | chr11:11934362             | USP47:miR-324-3p       |
| rs56146067 | chr11:11937422             | USP47:miR-545          |
| rs11022392 | chr11:12507973             | PARVA:miR-186          |
| rs34557626 | chr11:14256304             | RRAS2:miR-325          |
| rs11023803 | chr11:15948895             | SOX6:miR-18a           |
| rs11023803 | chr11:15948895             | SOX6:miR-18b           |
| rs34853590 | chr11:15950262             | SOX6:miR-409-3p        |
| rs34014906 | chr11:17064736             | PIK3C2A:miR-582        |
| rs11540752 | chr11:17065098             | PIK3C2A:miR-302b*      |
| rs1042876  | chr11:17309598             | NUCB2:miR-143          |
| rs5211     | chr11:17364870             | KCNJ11:miR-657         |
| rs1042806  | chr11:17700158             | MYOD1:miR-767-5p       |
| rs1042806  | chr11:17700158             | MYOD1:miR-220          |
| rs2291754  | chr11:18458594             | TSG101:miR-590         |
| rs56244714 | chr11:18681021             | TMEM86A:miR-483        |
| rs56244714 | chr11:18681021             | TMEM86A:miR-24         |
| rs8526     | chr11:20099470             | NAV2:miR-186           |
| rs1979073  | chr11:22356845             | SLC17A6:miR-656        |
| rs3195814  | chr11:22790999             | GAS2:miR-139           |
| rs3195814  | chr11:22790999             | GAS2:miR-17-3p         |
| rs11029982 | chr11:27344267             | LGR4:miR-584           |
| rs16917051 | chr11:27474699             | LIN7C:miR-218          |
| rs7124665  | chr11:27633663             | BDNF:miR-524*          |
| rs41282918 | chr11:27635356             | BDNF:miR-589           |
| rs12417138 | chr11:30389155             | MPPED2:miR-570         |
| rs5030327  | chr11:32366082             | WT1:miR-503            |
| rs10835909 | chr11:32417962             | WIT1:miR-589           |

**Supplemental Table 4: SNPs in miRNA target sites based on PITA prediction**

| <b>SNP</b> | <b>SNP Position (hg18)</b> | <b>PITA Prediction</b> |
|------------|----------------------------|------------------------|
| rs1802363  | chr11:32580433             | CCDC73:miR-199a*       |
| rs1802362  | chr11:32580490             | CCDC73:miR-570         |
| rs35682114 | chr11:32955930             | QSER1:miR-583          |
| rs8191     | chr11:34076803             | GPIAP1:miR-501         |
| rs8191     | chr11:34076803             | GPIAP1:miR-30a-5p      |
| rs8191     | chr11:34076803             | GPIAP1:miR-30b         |
| rs8191     | chr11:34076803             | GPIAP1:miR-30c         |
| rs8191     | chr11:34076803             | GPIAP1:miR-30d         |
| rs8191     | chr11:34076803             | GPIAP1:miR-30e-5p      |
| rs59577652 | chr11:34129117             | ABTB2:miR-569          |
| rs286890   | chr11:34637210             | EHF:miR-142-3p         |
| rs286890   | chr11:34637210             | EHF:miR-369-5p         |
| rs55734498 | chr11:35229492             | SLC1A2:miR-9*          |
| rs55734498 | chr11:35229492             | SLC1A2:miR-610         |
| rs16927202 | chr11:35238800             | SLC1A2:miR-552         |
| rs1570216  | chr11:35238910             | SLC1A2:miR-30a-5p      |
| rs1570216  | chr11:35238910             | SLC1A2:miR-30b         |
| rs1570216  | chr11:35238910             | SLC1A2:miR-30c         |
| rs1570216  | chr11:35238910             | SLC1A2:miR-30d         |
| rs1570216  | chr11:35238910             | SLC1A2:miR-30e-5p      |
| rs10551096 | chr11:35598852             | FJX1:miR-18a           |
| rs10551096 | chr11:35598852             | FJX1:miR-18b           |
| rs10551096 | chr11:35598852             | FJX1:miR-559           |
| rs34319421 | chr11:35598856             | FJX1:miR-559           |
| rs34319421 | chr11:35598856             | FJX1:miR-589           |
| rs4151045  | chr11:36556808             | RAG1:miR-361           |
| rs4151048  | chr11:36557260             | RAG1:miR-548c          |
| rs1056535  | chr11:43322573             | API5:miR-527           |
| rs1043746  | chr11:45861320             | CRY2:miR-625           |
| rs7928628  | chr11:46835006             | LRP4:miR-9*            |
| rs7928628  | chr11:46835006             | LRP4:miR-610           |
| rs14895    | chr11:46835112             | LRP4:miR-32            |
| rs11551406 | chr11:47139649             | C11orf49:miR-650       |
| rs1055824  | chr11:47142505             | ZNF289:miR-198         |
| rs1058418  | chr11:48145778             | PTPRJ:miR-516-3p       |
| rs10633679 | chr11:57224462             | ZDHHC5:miR-656         |
| rs34110973 | chr11:57224463             | ZDHHC5:miR-656         |
| rs947887   | chr11:57227825             | MED19:miR-32           |
| rs947887   | chr11:57227825             | MED19:miR-363          |
| rs11570227 | chr11:57340387             | CTNND1:miR-519a        |
| rs11570227 | chr11:57340387             | CTNND1:miR-519b        |
| rs11570227 | chr11:57340387             | CTNND1:miR-519c        |
| rs1057299  | chr11:57341354             | CTNND1:miR-9           |
| rs708228   | chr11:57342238             | CTNND1:miR-593         |
| rs708228   | chr11:57342238             | CTNND1:miR-624         |
| rs1802998  | chr11:57342349             | CTNND1:miR-518c*       |
| rs633713   | chr11:58141817             | ZFP91:miR-511          |
| rs2509925  | chr11:58143533             | ZFP91:miR-545          |
| rs1938588  | chr11:58650643             | FAM111B:miR-511        |
| rs1938588  | chr11:58650643             | FAM111B:miR-375        |
| rs14569    | chr11:58732159             | DTX4:miR-511           |
| rs498077   | chr11:59325778             | STX3A:miR-516-5p       |

**Supplemental Table 4: SNPs in miRNA target sites based on PITA prediction**

| <b>SNP</b> | <b>SNP Position (hg18)</b> | <b>PITA Prediction</b> |
|------------|----------------------------|------------------------|
| rs12790380 | chr11:59326713             | STX3A:miR-142-5p       |
| rs12790380 | chr11:59326713             | STX3A:miR-182          |
| rs61903590 | chr11:59326742             | STX3A:miR-381          |
| rs3209377  | chr11:60823979             | DDB1:miR-548c          |
| rs1058021  | chr11:60926820             | FLJ12529:miR-361       |
| rs1052603  | chr11:61488778             | VMD2:miR-9*            |
| rs11554851 | chr11:61488856             | VMD2:miR-31            |
| rs1050059  | chr11:62040026             | AHNAK:miR-106a         |
| rs1050059  | chr11:62040026             | AHNAK:miR-106b         |
| rs1050059  | chr11:62040026             | AHNAK:miR-17-5p        |
| rs1050059  | chr11:62040026             | AHNAK:miR-20a          |
| rs1050059  | chr11:62040026             | AHNAK:miR-20b          |
| rs1050059  | chr11:62040026             | AHNAK:miR-372          |
| rs1050059  | chr11:62040026             | AHNAK:miR-93           |
| rs1058684  | chr11:62117349             | MTA2:miR-146a          |
| rs1058684  | chr11:62117349             | MTA2:miR-146b          |
| rs60928821 | chr11:62117539             | MTA2:miR-150           |
| rs1053384  | chr11:63521655             | OTUB1:miR-493-5p       |
| rs14788    | chr11:63728456             | STIP1:miR-548d         |
| rs3839959  | chr11:63728466             | STIP1:miR-577          |
| rs3839959  | chr11:63728466             | STIP1:miR-488          |
| rs34502085 | chr11:63728474             | STIP1:miR-18a*         |
| rs3193820  | chr11:63768629             | PPP1R14B:miR-605       |
| rs3204919  | chr11:63840597             | ESRRA:miR-34b          |
| rs3204919  | chr11:63840597             | ESRRA:let-7a           |
| rs3204919  | chr11:63840597             | ESRRA:let-7b           |
| rs3204919  | chr11:63840597             | ESRRA:let-7c           |
| rs3204919  | chr11:63840597             | ESRRA:let-7d           |
| rs3204919  | chr11:63840597             | ESRRA:let-7f           |
| rs3204919  | chr11:63840597             | ESRRA:let-7g           |
| rs3204919  | chr11:63840597             | ESRRA:let-7i           |
| rs3204919  | chr11:63840597             | ESRRA:miR-98           |
| rs3204919  | chr11:63840597             | ESRRA:miR-650          |
| rs3204919  | chr11:63840597             | ESRRA:miR-368          |
| rs12790012 | chr11:63895705             | RPS6KA4:miR-641        |
| rs1059505  | chr11:64288897             | SF1:miR-653            |
| rs1061125  | chr11:64313232             | MAP4K2:miR-429         |
| rs35387404 | chr11:64875992             | DPF2:miR-637           |
| rs1044845  | chr11:64876993             | DPF2:miR-651           |
| rs56342407 | chr11:64937532             | FKSG44:miR-524*        |
| rs3832788  | chr11:65320075             | OVOL1:miR-577          |
| rs496388   | chr11:65320079             | OVOL1:miR-577          |
| rs496388   | chr11:65320079             | OVOL1:miR-559          |
| rs34038114 | chr11:65801438             | RAB1B:miR-519e         |
| rs34038114 | chr11:65801438             | RAB1B:miR-519d         |
| rs34038114 | chr11:65801438             | RAB1B:miR-520g         |
| rs34038114 | chr11:65801438             | RAB1B:miR-520h         |
| rs1043303  | chr11:65801458             | RAB1B:miR-140          |
| rs15969    | chr11:66150963             | RBM14:miR-650          |
| rs56790408 | chr11:66151121             | RBM14:miR-345          |
| rs61738767 | chr11:67152255             | NUDT8:miR-452          |
| rs3212906  | chr11:69177849             | CCND1:miR-410          |



**Supplemental Table 4: SNPs in miRNA target sites based on PITA prediction**

| <b>SNP</b> | <b>SNP Position (hg18)</b> | <b>PITA Prediction</b> |
|------------|----------------------------|------------------------|
| rs12286324 | chr11:69993374             | SHANK2:miR-494         |
| rs12785927 | chr11:69994723             | SHANK2:miR-410         |
| rs12785927 | chr11:69994723             | SHANK2:miR-374         |
| rs12785927 | chr11:69994723             | SHANK2:miR-369-3p      |
| rs12785928 | chr11:69994725             | SHANK2:miR-410         |
| rs12785928 | chr11:69994725             | SHANK2:miR-374         |
| rs12785928 | chr11:69994725             | SHANK2:miR-369-3p      |
| rs12785973 | chr11:69994794             | SHANK2:miR-587         |
| rs1055452  | chr11:71385113             | RNF121:miR-204         |
| rs1055452  | chr11:71385113             | RNF121:miR-211         |
| rs4466868  | chr11:71486411             | C11orf59:miR-509       |
| rs1045372  | chr11:72225556             | FCHSD2:miR-33          |
| rs3814729  | chr11:72227134             | FCHSD2:miR-448         |
| rs3814729  | chr11:72227134             | FCHSD2:miR-493-5p      |
| rs35343191 | chr11:72756784             | ARHGEF17:miR-337       |
| rs35343191 | chr11:72756784             | ARHGEF17:miR-766       |
| rs7941389  | chr11:72757627             | ARHGEF17:miR-594       |
| rs7941389  | chr11:72757627             | ARHGEF17:miR-605       |
| rs61901458 | chr11:73065146             | RAB6A:miR-376a*        |
| rs11539613 | chr11:73065349             | RAB6A:miR-153          |
| rs3182807  | chr11:73066374             | RAB6A:miR-203          |
| rs3741142  | chr11:73066522             | RAB6A:miR-23a          |
| rs3741142  | chr11:73066522             | RAB6A:miR-23b          |
| rs35662648 | chr11:74961445             | SERPINH1:miR-568       |
| rs59400584 | chr11:75530181             | UVRAG:miR-126*         |
| rs17134603 | chr11:75532712             | UVRAG:miR-518c*        |
| rs17134603 | chr11:75532712             | UVRAG:miR-548c         |
| rs1044265  | chr11:75939776             | C11orf30:miR-382       |
| rs17856033 | chr11:77489732             | ALG8:miR-189           |
| rs9922     | chr11:77604161             | GAB2:miR-410           |
| rs9922     | chr11:77604161             | GAB2:miR-191           |
| rs12270560 | chr11:78044896             | ODZ4:miR-630           |
| rs61900110 | chr11:82845499             | DLG2:miR-148a          |
| rs35315586 | chr11:82845885             | DLG2:miR-149           |
| rs11233623 | chr11:82847076             | DLG2:miR-196a          |
| rs11233623 | chr11:82847076             | DLG2:miR-196b          |
| rs34567508 | chr11:82847801             | DLG2:miR-568           |
| rs622406   | chr11:85050011             | ZF:miR-548a            |
| rs622406   | chr11:85050011             | ZF:miR-9*              |
| rs34488116 | chr11:85347206             | PICALM:miR-613         |
| rs36094205 | chr11:85347218             | PICALM:miR-632         |
| rs61284324 | chr11:85347599             | PICALM:miR-205         |
| rs15135    | chr11:86334451             | FZD4:miR-144           |
| rs11235098 | chr11:86711810             | TMEM135:miR-569        |
| rs3462     | chr11:87881140             | GRM5:miR-532           |
| rs59997101 | chr11:92267062             | FAT3:miR-579           |
| rs13447760 | chr11:93790240             | MRE11A:miR-559         |
| rs11574857 | chr11:93919323             | FUT4:miR-23a           |
| rs11574857 | chr11:93919323             | FUT4:miR-23b           |
| rs61450330 | chr11:93920992             | FUT4:miR-155           |
| rs61701647 | chr11:94441282             | SFRS2B:miR-187         |
| rs1129081  | chr11:95141787             | FAM76B:miR-203         |

**Supplemental Table 4: SNPs in miRNA target sites based on PITA prediction**

| <b>SNP</b> | <b>SNP Position (hg18)</b> | <b>PITA Prediction</b> |
|------------|----------------------------|------------------------|
| rs56333000 | chr11:99732343             | CNTN5:miR-548d         |
| rs36028285 | chr11:99732461             | CNTN5:miR-605          |
| rs488365   | chr11:100369577            | TMEM133:miR-101        |
| rs488365   | chr11:100369577            | TMEM133:miR-139        |
| rs35593916 | chr11:100369615            | TMEM133:miR-203        |
| rs484389   | chr11:100415019            | PGR:miR-641            |
| rs12999    | chr11:102438167            | DCUN1D5:miR-583        |
| rs34126377 | chr11:105288301            | GRIA4:miR-656          |
| rs58915339 | chr11:105474472            | AASDHPPT:miR-577       |
| rs58915339 | chr11:105474472            | AASDHPPT:miR-559       |
| rs58915339 | chr11:105474472            | AASDHPPT:miR-142-5p    |
| rs61743188 | chr11:106901521            | ALKBH8:miR-544         |
| rs61743188 | chr11:106901521            | ALKBH8:miR-557         |
| rs585507   | chr11:107083487            | SLN:miR-145            |
| rs7112974  | chr11:107480475            | CUL5:miR-509           |
| rs34584659 | chr11:107482512            | CUL5:miR-499           |
| rs3092837  | chr11:107742129            | ATM:miR-583            |
| rs35138658 | chr11:109541871            | ZC3H12C:miR-561        |
| rs643433   | chr11:109542013            | ZC3H12C:miR-589        |
| rs4252590  | chr11:111290026            | HSPB2:miR-125a         |
| rs4252590  | chr11:111290026            | HSPB2:miR-125b         |
| rs1057924  | chr11:112651411            | NCAM1:miR-210          |
| rs35983476 | chr11:112651604            | NCAM1:miR-184          |
| rs12275130 | chr11:112652087            | NCAM1:miR-602          |
| rs12275130 | chr11:112652087            | NCAM1:miR-496          |
| rs12275130 | chr11:112652087            | NCAM1:miR-557          |
| rs9619     | chr11:113826133            | REXO2:miR-448          |
| rs15469    | chr11:113826158            | REXO2:miR-522          |
| rs59374062 | chr11:114550435            | CADM1:miR-106a         |
| rs59374062 | chr11:114550435            | CADM1:miR-106b         |
| rs59374062 | chr11:114550435            | CADM1:miR-17-5p        |
| rs59374062 | chr11:114550435            | CADM1:miR-20a          |
| rs59374062 | chr11:114550435            | CADM1:miR-20b          |
| rs59374062 | chr11:114550435            | CADM1:miR-372          |
| rs59374062 | chr11:114550435            | CADM1:miR-93           |
| rs1048876  | chr11:114552104            | CADM1:miR-124a         |
| rs608176   | chr11:117538999            | SCN2B:miR-330          |
| rs61900934 | chr11:117774134            | UBE4A:miR-145          |
| rs1802486  | chr11:117785063            | ATP5L:miR-181a         |
| rs1802486  | chr11:117785063            | ATP5L:miR-181c         |
| rs9332868  | chr11:117898633            | MLL:miR-150            |
| rs12422097 | chr11:117976840            | ARCN1:miR-599          |
| rs45489001 | chr11:117978641            | ARCN1:miR-509          |
| rs35180728 | chr11:117978797            | ARCN1:miR-409-3p       |
| rs35180728 | chr11:117978797            | ARCN1:miR-613          |
| rs61901394 | chr11:118126196            | DDX6:miR-561           |
| rs484916   | chr11:118127346            | DDX6:miR-515-5p        |
| rs484916   | chr11:118127346            | DDX6:miR-519e*         |
| rs561717   | chr11:118127655            | DDX6:miR-768-5p        |
| rs3782048  | chr11:118272247            | BCL9L:miR-644          |
| rs7759     | chr11:118472501            | DPAGT1:miR-383         |
| rs1046471  | chr11:118492870            | TMEM24:miR-149         |

**Supplemental Table 4: SNPs in miRNA target sites based on PITA prediction**

| <b>SNP</b> | <b>SNP Position (hg18)</b> | <b>PITA Prediction</b> |
|------------|----------------------------|------------------------|
| rs12785779 | chr11:118684521            | MCAM:miR-568           |
| rs61900003 | chr11:118712580            | RNF26:miR-153          |
| rs6649     | chr11:118713138            | RNF26:miR-504          |
| rs11446937 | chr11:122335628            | C11orf63:miR-653       |
| rs55842997 | chr11:124141882            | C11orf61:miR-368       |
| rs3763     | chr11:124821071            | FEZ1:miR-375           |
| rs3763     | chr11:124821071            | FEZ1:miR-581           |
| rs12420149 | chr11:124959027            | EI24:miR-548b          |
| rs12420149 | chr11:124959027            | EI24:miR-548c          |
| rs3737336  | chr11:125335907            | CDON:miR-181b          |
| rs3737336  | chr11:125335907            | CDON:miR-181d          |
| rs3781768  | chr11:125638080            | SRPR:miR-137           |
| rs1049496  | chr11:125789619            | ST3GAL4:miR-518c*      |
| rs1049496  | chr11:125789619            | ST3GAL4:miR-642        |
| rs1128355  | chr11:127834044            | ETS1:miR-514           |
| rs41302401 | chr11:128186433            | FLI1:miR-9             |
| rs56126203 | chr11:129609147            | BTBD15:miR-9           |
| rs11555857 | chr11:131711301            | HNT:miR-302b*          |
| rs59742442 | chr12:263248               | JARID1A:miR-511        |
| rs34429881 | chr12:263637               | JARID1A:miR-633        |
| rs34910358 | chr12:889206               | WNK1:miR-492           |
| rs34910358 | chr12:889206               | WNK1:miR-422a          |
| rs11571496 | chr12:890693               | WNK1:miR-33            |
| rs11571495 | chr12:890767               | WNK1:miR-31            |
| rs11571493 | chr12:890802               | WNK1:miR-130a          |
| rs11571493 | chr12:890802               | WNK1:miR-130b          |
| rs11571493 | chr12:890802               | WNK1:miR-301           |
| rs11571493 | chr12:890802               | WNK1:miR-454-3p        |
| rs11571493 | chr12:890802               | WNK1:miR-520g          |
| rs11571493 | chr12:890802               | WNK1:miR-520h          |
| rs35187506 | chr12:1768055              | ADIPOR2:miR-605        |
| rs35187506 | chr12:1768055              | ADIPOR2:miR-491        |
| rs60372955 | chr12:4284375              | CCND2:miR-765          |
| rs61152953 | chr12:4284438              | CCND2:miR-559          |
| rs3217934  | chr12:4284472              | CCND2:miR-422b         |
| rs13312800 | chr12:4347998              | FGF23:miR-200b         |
| rs13312800 | chr12:4347998              | FGF23:miR-200c         |
| rs13312800 | chr12:4347998              | FGF23:miR-429          |
| rs61635955 | chr12:4792800              | KCNA6:miR-153          |
| rs41276728 | chr12:4893142              | KCNA1:miR-579          |
| rs1803110  | chr12:6217510              | CD9:miR-410            |
| rs41279084 | chr12:6217586              | CD9:miR-186            |
| rs1803109  | chr12:6217594              | CD9:miR-186            |
| rs1803109  | chr12:6217594              | CD9:miR-577            |
| rs2534716  | chr12:6443977              | VAMP1:miR-363*         |
| rs1049342  | chr12:6549558              | CHD4:miR-140           |
| rs11539540 | chr12:6549558              | CHD4:miR-140           |
| rs4764476  | chr12:6673942              | C12orf53:miR-15a       |
| rs4764476  | chr12:6673942              | C12orf53:miR-15b       |
| rs4764476  | chr12:6673942              | C12orf53:miR-16        |
| rs4764476  | chr12:6673942              | C12orf53:miR-195       |
| rs4764476  | chr12:6673942              | C12orf53:miR-497       |

**Supplemental Table 4: SNPs in miRNA target sites based on PITA prediction**

| <b>SNP</b> | <b>SNP Position (hg18)</b> | <b>PITA Prediction</b> |
|------------|----------------------------|------------------------|
| rs16932921 | chr12:6798830              | CD4:miR-579            |
| rs16932921 | chr12:6798830              | CD4:miR-181b           |
| rs16932921 | chr12:6798830              | CD4:miR-181d           |
| rs1044632  | chr12:6944873              | PHB2:miR-539           |
| rs12231823 | chr12:7255235              | PEX5:miR-591           |
| rs11542242 | chr12:7255263              | PEX5:miR-524*          |
| rs11542242 | chr12:7255263              | PEX5:miR-381           |
| rs12579221 | chr12:7965090              | SLC2A3:miR-577         |
| rs12579221 | chr12:7965090              | SLC2A3:miR-561         |
| rs56872129 | chr12:8818775              | FAM80B:miR-330         |
| rs56872129 | chr12:8818775              | FAM80B:miR-559         |
| rs11554711 | chr12:8820983              | FAM80B:miR-577         |
| rs56130437 | chr12:8984268              | M6PR:miR-524*          |
| rs11052491 | chr12:9739765              | CLEC2D:miR-516-3p      |
| rs16910526 | chr12:10162354             | CLEC7A:miR-429         |
| rs16910526 | chr12:10162354             | CLEC7A:miR-656         |
| rs1801810  | chr12:10202218             | OLR1:miR-653           |
| rs1801810  | chr12:10202218             | OLR1:miR-570           |
| rs1043145  | chr12:10743024             | CSDA:miR-559           |
| rs15223    | chr12:10743100             | CSDA:miR-183           |
| rs34166149 | chr12:11935661             | ETV6:miR-380-3p        |
| rs61738409 | chr12:12138961             | BCL2L14:miR-331        |
| rs12827301 | chr12:12164181             | LRP6:miR-495           |
| rs12827301 | chr12:12164181             | LRP6:miR-495           |
| rs12827301 | chr12:12164181             | LRP6:miR-495           |
| rs12827309 | chr12:12164189             | LRP6:miR-495           |
| rs61195540 | chr12:12164244             | LRP6:miR-568           |
| rs61195540 | chr12:12164244             | LRP6:miR-522           |
| rs61915603 | chr12:12687168             | CREBL2:miR-216         |
| rs61915603 | chr12:12687168             | CREBL2:miR-452*        |
| rs4555     | chr12:12688139             | CREBL2:miR-142-5p      |
| rs10237    | chr12:12766272             | CDKN1B:miR-485-3p      |
| rs3191064  | chr12:13260841             | EMP1:miR-19a           |
| rs3191064  | chr12:13260841             | EMP1:miR-19b           |
| rs1805503  | chr12:13606417             | GRIN2B:miR-568         |
| rs34370668 | chr12:14542472             | ATF7IP:miR-151         |
| rs11538258 | chr12:14830765             | WBP11:miR-493-5p       |
| rs1802754  | chr12:15641126             | PTPRO:miR-767-5p       |
| rs1043032  | chr12:15947489             | STRAP:miR-302c*        |
| rs1043072  | chr12:15947626             | STRAP:miR-34a          |
| rs1043072  | chr12:15947626             | STRAP:miR-34c          |
| rs1043072  | chr12:15947626             | STRAP:miR-449          |
| rs1043072  | chr12:15947626             | STRAP:miR-449b         |
| rs1043072  | chr12:15947626             | STRAP:miR-34b          |
| rs1043072  | chr12:15947626             | STRAP:let-7a           |
| rs1043072  | chr12:15947626             | STRAP:let-7b           |
| rs1043072  | chr12:15947626             | STRAP:let-7c           |
| rs1043072  | chr12:15947626             | STRAP:let-7d           |
| rs1043072  | chr12:15947626             | STRAP:let-7f           |
| rs1043072  | chr12:15947626             | STRAP:let-7g           |
| rs1043072  | chr12:15947626             | STRAP:let-7i           |
| rs1043072  | chr12:15947626             | STRAP:miR-98           |

**Supplemental Table 4: SNPs in miRNA target sites based on PITA prediction**

| <b>SNP</b> | <b>SNP Position (hg18)</b> | <b>PITA Prediction</b> |
|------------|----------------------------|------------------------|
| rs1043072  | chr12:15947626             | STRAP:miR-650          |
| rs35048756 | chr12:19562405             | AEBP2:miR-648          |
| rs11834998 | chr12:19564184             | AEBP2:miR-570          |
| rs13035    | chr12:21514389             | FLJ22028:miR-409-3p    |
| rs34674091 | chr12:21562349             | GOLT1B:miR-519d        |
| rs7606     | chr12:22109834             | CMAS:miR-187           |
| rs61921401 | chr12:22492947             | KIAA0528:miR-1         |
| rs61921401 | chr12:22492947             | KIAA0528:miR-206       |
| rs61921401 | chr12:22492947             | KIAA0528:miR-380-3p    |
| rs58278175 | chr12:24859410             | BCAT1:miR-1            |
| rs58278175 | chr12:24859410             | BCAT1:miR-206          |
| rs61764374 | chr12:25249685             | KRAS:miR-568           |
| rs61764373 | chr12:25249689             | KRAS:miR-568           |
| rs1141947  | chr12:25253689             | KRAS:miR-509           |
| rs712      | chr12:25253819             | KRAS:miR-768-5p        |
| rs6252     | chr12:28002340             | PTHLH:miR-429          |
| rs6251     | chr12:28002502             | PTHLH:miR-15a          |
| rs6251     | chr12:28002502             | PTHLH:miR-15b          |
| rs6251     | chr12:28002502             | PTHLH:miR-16           |
| rs6251     | chr12:28002502             | PTHLH:miR-195          |
| rs6251     | chr12:28002502             | PTHLH:miR-497          |
| rs6249     | chr12:28002503             | PTHLH:miR-15a          |
| rs6249     | chr12:28002503             | PTHLH:miR-15b          |
| rs6249     | chr12:28002503             | PTHLH:miR-16           |
| rs6249     | chr12:28002503             | PTHLH:miR-195          |
| rs6249     | chr12:28002503             | PTHLH:miR-497          |
| rs34973493 | chr12:28594252             | CCDC91:miR-569         |
| rs4931197  | chr12:29546882             | TMTC1:miR-9            |
| rs1063983  | chr12:30674575             | IPO8:miR-376a          |
| rs1063983  | chr12:30674575             | IPO8:miR-376b          |
| rs1063983  | chr12:30674575             | IPO8:miR-513           |
| rs11051005 | chr12:30674742             | IPO8:miR-548b          |
| rs11051005 | chr12:30674742             | IPO8:miR-548c          |
| rs4015571  | chr12:31326310             | FAM60A:miR-373*        |
| rs4015571  | chr12:31326310             | FAM60A:miR-616         |
| rs11833865 | chr12:31712283             | MGC50559:miR-181b      |
| rs11833865 | chr12:31712283             | MGC50559:miR-181d      |
| rs12698    | chr12:31715711             | LOC196394:miR-579      |
| rs1295     | chr12:32037154             | C12orf35:miR-181b      |
| rs1295     | chr12:32037154             | C12orf35:miR-181d      |
| rs7952795  | chr12:37006953             | ALG10B:miR-542-3p      |
| rs11461823 | chr12:37007203             | ALG10B:miR-600         |
| rs12425956 | chr12:37007235             | ALG10B:miR-377         |
| rs12425956 | chr12:37007235             | ALG10B:miR-342         |
| rs17125597 | chr12:37332812             | CPNE8:miR-578          |
| rs12308044 | chr12:37333187             | CPNE8:miR-27a          |
| rs12308044 | chr12:37333187             | CPNE8:miR-27b          |
| rs12426280 | chr12:38438218             | SLC2A13:miR-506        |
| rs35680052 | chr12:38439787             | SLC2A13:miR-583        |
| rs11461565 | chr12:40764057             | GLT8D3:miR-641         |
| rs2131213  | chr12:40766882             | GLT8D3:let-7e          |
| rs17224177 | chr12:40767710             | GLT8D3:miR-200b        |

**Supplemental Table 4: SNPs in miRNA target sites based on PITA prediction**

| <b>SNP</b> | <b>SNP Position (hg18)</b> | <b>PITA Prediction</b> |
|------------|----------------------------|------------------------|
| rs17224177 | chr12:40767710             | GLT8D3:miR-200c        |
| rs17224177 | chr12:40767710             | GLT8D3:miR-429         |
| rs2290539  | chr12:40839486             | YAF2:miR-522           |
| rs12227395 | chr12:41128411             | PPHLN1:miR-514         |
| rs7302676  | chr12:43188531             | NELL2:miR-493-5p       |
| rs7418     | chr12:46463059             | HDAC7A:miR-202*        |
| rs57061363 | chr12:46463491             | HDAC7A:miR-147         |
| rs11539602 | chr12:47682648             | PRKAG1:miR-383         |
| rs35891250 | chr12:47701354             | MLL2:miR-631           |
| rs59990555 | chr12:48012593             | C1QL4:miR-513          |
| rs3751214  | chr12:48323748             | FMNL3:miR-135a         |
| rs3751214  | chr12:48323748             | FMNL3:miR-135b         |
| rs8987     | chr12:48669417             | RACGAP1:miR-527        |
| rs34724560 | chr12:48670167             | RACGAP1:miR-584        |
| rs41291985 | chr12:48761973             | ACCN2:miR-650          |
| rs1051497  | chr12:48762753             | ACCN2:miR-552          |
| rs36125542 | chr12:48780354             | SMARCD1:miR-223        |
| rs34307147 | chr12:48780369             | SMARCD1:miR-650        |
| rs34307147 | chr12:48780369             | SMARCD1:miR-491        |
| rs57615143 | chr12:48809877             | LASS5:miR-495          |
| rs57615143 | chr12:48809877             | LASS5:miR-199a*        |
| rs57615143 | chr12:48809877             | LASS5:miR-633          |
| rs891      | chr12:49923625             | DAZAP2:miR-145         |
| rs1140398  | chr12:49923814             | DAZAP2:miR-607         |
| rs3741705  | chr12:50488291             | SCN8A:miR-508          |
| rs3741705  | chr12:50488291             | SCN8A:miR-186          |
| rs1042473  | chr12:50739505             | NR4A1:miR-383          |
| rs7961997  | chr12:51720311             | EIF4B:miR-185          |
| rs11542590 | chr12:51720551             | EIF4B:miR-23a          |
| rs11542590 | chr12:51720551             | EIF4B:miR-23b          |
| rs5798238  | chr12:51890815             | RARG:miR-326           |
| rs5798239  | chr12:51890837             | RARG:miR-331           |
| rs5798239  | chr12:51890837             | RARG:miR-518c*         |
| rs34603874 | chr12:51891024             | RARG:miR-339           |
| rs4790     | chr12:52159633             | PCBP2:miR-363*         |
| rs55730102 | chr12:52159734             | PCBP2:miR-610          |
| rs11362454 | chr12:52735799             | HOXC4:miR-150          |
| rs11554014 | chr12:52735990             | HOXC4:miR-376a*        |
| rs11554014 | chr12:52735990             | HOXC4:miR-26a          |
| rs11554014 | chr12:52735990             | HOXC4:miR-26b          |
| rs13514    | chr12:53049494             | ZNF385:miR-658         |
| rs4357739  | chr12:53049712             | ZNF385:miR-372         |
| rs4357739  | chr12:53049712             | ZNF385:miR-93          |
| rs10783631 | chr12:53259110             | PDE1B:miR-519a         |
| rs10783631 | chr12:53259110             | PDE1B:miR-519b         |
| rs10783631 | chr12:53259110             | PDE1B:miR-519c         |
| rs17118024 | chr12:54501188             | ORMDL2:miR-324-3p      |
| rs17118024 | chr12:54501188             | ORMDL2:miR-189         |
| rs3208548  | chr12:54633972             | DGKA:miR-608           |
| rs1050205  | chr12:54673091             | RAB5B:miR-18a          |
| rs1050205  | chr12:54673091             | RAB5B:miR-18b          |
| rs1050206  | chr12:54673093             | RAB5B:miR-18a          |

**Supplemental Table 4: SNPs in miRNA target sites based on PITA prediction**

| <b>SNP</b> | <b>SNP Position (hg18)</b> | <b>PITA Prediction</b> |
|------------|----------------------------|------------------------|
| rs1050206  | chr12:54673093             | RAB5B:miR-18b          |
| rs1050209  | chr12:54673166             | RAB5B:miR-448          |
| rs11673    | chr12:54674599             | RAB5B:miR-383          |
| rs11673    | chr12:54674599             | RAB5B:miR-548a         |
| rs35866089 | chr12:54716504             | IKZF4:miR-650          |
| rs4016501  | chr12:54797857             | RPL41:miR-503          |
| rs4016502  | chr12:54797861             | RPL41:miR-503          |
| rs4016502  | chr12:54797861             | RPL41:miR-570          |
| rs4847     | chr12:54841585             | MYL6:miR-598           |
| rs57290094 | chr12:54885549             | RNF41:miR-583          |
| rs12815735 | chr12:54919270             | ANKRD52:miR-296        |
| rs2935008  | chr12:55131237             | MIP:miR-328            |
| rs1135141  | chr12:55275994             | BAZ2A:miR-140          |
| rs35101794 | chr12:55275997             | BAZ2A:miR-140          |
| rs15258    | chr12:55343761             | PTGES3:miR-577         |
| rs35314745 | chr12:55934137             | R3HDM2:miR-583         |
| rs7309842  | chr12:55934213             | R3HDM2:miR-539         |
| rs1054519  | chr12:56196655             | DDIT3:miR-224          |
| rs1054519  | chr12:56196655             | MARS:miR-573           |
| rs35831868 | chr12:56306627             | B4GALNT1:miR-597       |
| rs1801928  | chr12:56500849             | CTDSP2:miR-198         |
| rs11555554 | chr12:56500897             | CTDSP2:miR-671         |
| rs12313937 | chr12:60389816             | FAM19A2:miR-643        |
| rs61921870 | chr12:61084764             | USP15:miR-338          |
| rs3825301  | chr12:61084824             | USP15:miR-219          |
| rs11174462 | chr12:61085668             | USP15:miR-655          |
| rs11174462 | chr12:61085668             | USP15:miR-369-3p       |
| rs11174462 | chr12:61085668             | USP15:miR-374          |
| rs12319634 | chr12:62239448             | DPY19L2:miR-429        |
| rs12319634 | chr12:62239448             | DPY19L2:miR-656        |
| rs41292029 | chr12:63181469             | TBK1:miR-578           |
| rs17100600 | chr12:63394798             | GNS:miR-620            |
| rs11175698 | chr12:63927528             | LEMD3:miR-517a         |
| rs11175698 | chr12:63927528             | LEMD3:miR-517c         |
| rs12304180 | chr12:63928007             | LEMD3:miR-7            |
| rs11175699 | chr12:63928323             | LEMD3:miR-542-3p       |
| rs11324467 | chr12:64143931             | MSRB3:miR-302c*        |
| rs17847167 | chr12:64644068             | HMGA2:miR-370          |
| rs56788643 | chr12:64644602             | HMGA2:let-7a           |
| rs56788643 | chr12:64644602             | HMGA2:let-7b           |
| rs56788643 | chr12:64644602             | HMGA2:let-7c           |
| rs56788643 | chr12:64644602             | HMGA2:let-7d           |
| rs56788643 | chr12:64644602             | HMGA2:let-7f           |
| rs56788643 | chr12:64644602             | HMGA2:let-7g           |
| rs56788643 | chr12:64644602             | HMGA2:let-7i           |
| rs56788643 | chr12:64644602             | HMGA2:miR-98           |
| rs34231266 | chr12:64644813             | HMGA2:miR-653          |
| rs17847170 | chr12:64645450             | HMGA2:miR-24           |
| rs1042741  | chr12:64645530             | HMGA2:miR-765          |
| rs1042742  | chr12:64645531             | HMGA2:miR-765          |
| rs3741645  | chr12:66339084             | DYRK2:miR-514          |
| rs2069734  | chr12:66835277             | IFNG:miR-382           |

**Supplemental Table 4: SNPs in miRNA target sites based on PITA prediction**

| <b>SNP</b> | <b>SNP Position (hg18)</b> | <b>PITA Prediction</b> |
|------------|----------------------------|------------------------|
| rs542403   | chr12:68257534             | FRS2:miR-202           |
| rs61759374 | chr12:68258319             | FRS2:miR-655           |
| rs61759449 | chr12:68258936             | FRS2:miR-591           |
| rs61759450 | chr12:68259051             | FRS2:miR-561           |
| rs61759451 | chr12:68259183             | FRS2:miR-96            |
| rs61759451 | chr12:68259183             | FRS2:miR-571           |
| rs503881   | chr12:68259471             | FRS2:miR-569           |
| rs10506567 | chr12:68281593             | CCT2:miR-153           |
| rs61929939 | chr12:69034608             | CNOT2:miR-34a          |
| rs61929939 | chr12:69034608             | CNOT2:miR-34c          |
| rs61929939 | chr12:69034608             | CNOT2:miR-449          |
| rs61929939 | chr12:69034608             | CNOT2:miR-449b         |
| rs61929939 | chr12:69034608             | CNOT2:miR-612          |
| rs12813359 | chr12:69034753             | CNOT2:miR-202          |
| rs11837486 | chr12:70289690             | PSRC2:miR-200b         |
| rs11837486 | chr12:70289690             | PSRC2:miR-200c         |
| rs11178944 | chr12:70465881             | RAB21:miR-96           |
| rs59148072 | chr12:70466427             | RAB21:miR-381          |
| rs56100239 | chr12:70466631             | RAB21:miR-218          |
| rs4457797  | chr12:70604096             | TBC1D15:miR-30a-5p     |
| rs4457797  | chr12:70604096             | TBC1D15:miR-30b        |
| rs4457797  | chr12:70604096             | TBC1D15:miR-30c        |
| rs4457797  | chr12:70604096             | TBC1D15:miR-30d        |
| rs4457797  | chr12:70604096             | TBC1D15:miR-30e-5p     |
| rs11541035 | chr12:74728035             | NAP1L1:miR-224         |
| rs11541036 | chr12:74728041             | NAP1L1:miR-224         |
| rs11541040 | chr12:74728087             | NAP1L1:miR-422a        |
| rs35860567 | chr12:75771499             | ZDHHC17:miR-425-5p     |
| rs3803038  | chr12:77129672             | NAV3:miR-592           |
| rs3803039  | chr12:77129759             | NAV3:miR-516-3p        |
| rs3803039  | chr12:77129759             | NAV3:miR-518a          |
| rs3803039  | chr12:77129759             | NAV3:miR-518e          |
| rs3803039  | chr12:77129759             | NAV3:miR-518f          |
| rs11114244 | chr12:78692998             | PPP1R12A:miR-589       |
| rs11114244 | chr12:78692998             | PPP1R12A:miR-369-3p    |
| rs11104904 | chr12:87411855             | KITLG:miR-335          |
| rs11104904 | chr12:87411855             | KITLG:miR-424          |
| rs41309409 | chr12:87412471             | KITLG:miR-203          |
| rs41300072 | chr12:87412826             | KITLG:miR-369-3p       |
| rs41300046 | chr12:87412847             | KITLG:miR-562          |
| rs41300046 | chr12:87412847             | KITLG:miR-646          |
| rs1059400  | chr12:88266499             | DUSP6:miR-501          |
| rs28399547 | chr12:91061069             | BTG1:miR-185           |
| rs13599    | chr12:91061508             | BTG1:miR-372           |
| rs13599    | chr12:91061508             | BTG1:miR-93            |
| rs28399546 | chr12:91061597             | BTG1:miR-802           |
| rs11404900 | chr12:91693621             | EEA1:miR-586           |
| rs11404900 | chr12:91693621             | EEA1:miR-33b           |
| rs34704075 | chr12:92327675             | UBE2N:miR-625          |
| rs1053642  | chr12:92494062             | SOCS2:miR-199a*        |
| rs1053642  | chr12:92494062             | SOCS2:miR-194          |
| rs34954531 | chr12:94218647             | VEZT:miR-30a-3p        |



**Supplemental Table 4: SNPs in miRNA target sites based on PITA prediction**

| <b>SNP</b> | <b>SNP Position (hg18)</b> | <b>PITA Prediction</b> |
|------------|----------------------------|------------------------|
| rs34954531 | chr12:94218647             | VEZT:miR-30e-3p        |
| rs11539581 | chr12:94576104             | NTN4:miR-33            |
| rs11539581 | chr12:94576104             | NTN4:miR-33b           |
| rs2302901  | chr12:95185145             | ELK3:miR-193b          |
| rs34658440 | chr12:95196536             | PCTK2:miR-520g         |
| rs34658440 | chr12:95196536             | PCTK2:miR-520h         |
| rs1802615  | chr12:97465882             | TMPO:miR-221           |
| rs34975028 | chr12:97662284             | ANKS1B:miR-569         |
| rs34439058 | chr12:97662675             | ANKS1B:miR-542-3p      |
| rs57332865 | chr12:97662899             | ANKS1B:miR-188         |
| rs57332865 | chr12:97662899             | ANKS1B:miR-623         |
| rs10985    | chr12:97663488             | ANKS1B:miR-186         |
| rs823561   | chr12:100045863            | TMEM16D:miR-33         |
| rs1043677  | chr12:100664328            | GNPTAB:miR-494         |
| rs1043677  | chr12:100664328            | GNPTAB:miR-641         |
| rs17032062 | chr12:100839635            | DRAM:miR-302a          |
| rs17032062 | chr12:100839635            | DRAM:miR-302b          |
| rs17032062 | chr12:100839635            | DRAM:miR-302c          |
| rs17032062 | chr12:100839635            | DRAM:miR-302d          |
| rs17032062 | chr12:100839635            | DRAM:miR-373           |
| rs17032062 | chr12:100839635            | DRAM:miR-520a          |
| rs17032062 | chr12:100839635            | DRAM:miR-520b          |
| rs17032062 | chr12:100839635            | DRAM:miR-520c          |
| rs17032062 | chr12:100839635            | DRAM:miR-520d          |
| rs17032062 | chr12:100839635            | DRAM:miR-520e          |
| rs17032062 | chr12:100839635            | DRAM:miR-526b*         |
| rs5742714  | chr12:101313982            | IGF1:miR-383           |
| rs5742710  | chr12:101315432            | IGF1:miR-32            |
| rs17847185 | chr12:101315843            | IGF1:miR-508           |
| rs17847185 | chr12:101315843            | IGF1:miR-302b*         |
| rs3730205  | chr12:101315879            | IGF1:miR-584           |
| rs3730188  | chr12:101315989            | IGF1:miR-568           |
| rs3730188  | chr12:101315989            | IGF1:miR-142-5p        |
| rs3730188  | chr12:101315989            | IGF1:miR-559           |
| rs17884961 | chr12:101316308            | IGF1:miR-136           |
| rs35234844 | chr12:101319091            | IGF1:miR-204           |
| rs35234844 | chr12:101319091            | IGF1:miR-211           |
| rs3730223  | chr12:101319491            | IGF1:miR-410           |
| rs3730210  | chr12:101319573            | IGF1:miR-190           |
| rs5031032  | chr12:101320262            | IGF1:miR-613           |
| rs61250514 | chr12:101320292            | IGF1:miR-574           |
| rs5742698  | chr12:101320388            | IGF1:miR-597           |
| rs61941089 | chr12:101878315            | ASCL1:miR-34b          |
| rs34660835 | chr12:101878317            | ASCL1:miR-34b          |
| rs61941090 | chr12:101878317            | ASCL1:miR-34b          |
| rs4135143  | chr12:102905248            | TDG:miR-203            |
| rs3928004  | chr12:102906517            | TDG:miR-199a*          |
| rs2468333  | chr12:103036530            | NFYB:miR-519a          |
| rs2468333  | chr12:103036530            | NFYB:miR-519b          |
| rs2468333  | chr12:103036530            | NFYB:miR-519c          |
| rs1044607  | chr12:104086842            | KIAA1033:miR-574       |
| rs1044607  | chr12:104086842            | KIAA1033:miR-105       |

**Supplemental Table 4: SNPs in miRNA target sites based on PITA prediction**

| <b>SNP</b> | <b>SNP Position (hg18)</b> | <b>PITA Prediction</b> |
|------------|----------------------------|------------------------|
| rs59421277 | chr12:104981605            | NUAK1:miR-648          |
| rs12828319 | chr12:105264818            | TCP11L2:miR-451        |
| rs12828319 | chr12:105264818            | TCP11L2:miR-548d       |
| rs3204848  | chr12:105891569            | C12orf23:miR-493-5p    |
| rs1056560  | chr12:105909740            | CRY1:miR-219           |
| rs703691   | chr12:107440807            | SART3:miR-563          |
| rs56104339 | chr12:107563154            | CORO1C:miR-577         |
| rs58019732 | chr12:107828807            | SVOP:miR-190           |
| rs2241203  | chr12:108475933            | MMAB:miR-381           |
| rs2241203  | chr12:108475933            | MMAB:miR-524*          |
| rs55975160 | chr12:108773186            | GLTP:miR-548c          |
| rs1044994  | chr12:108960978            | ANKRD13:miR-381        |
| rs1042649  | chr12:109268757            | ATP2A2:miR-567         |
| rs3182120  | chr12:109268863            | ATP2A2:miR-493-5p      |
| rs1803736  | chr12:109268904            | ATP2A2:miR-520d*       |
| rs58154880 | chr12:109269294            | ATP2A2:miR-548a        |
| rs1803735  | chr12:109269449            | ATP2A2:miR-34a         |
| rs1803735  | chr12:109269449            | ATP2A2:miR-34c         |
| rs1803735  | chr12:109269449            | ATP2A2:miR-449         |
| rs1803735  | chr12:109269449            | ATP2A2:miR-449b        |
| rs1803735  | chr12:109269449            | ATP2A2:miR-34b         |
| rs3415     | chr12:109273140            | ATP2A2:miR-651         |
| rs9540     | chr12:109273238            | ATP2A2:miR-574         |
| rs15467    | chr12:109642223            | PPP1CC:miR-568         |
| rs10661    | chr12:110374904            | ATXN2:miR-559          |
| rs35907313 | chr12:110815335            | MAPKAPK5:miR-584       |
| rs10431388 | chr12:110949014            | C12orf30:miR-802       |
| rs7295294  | chr12:110949276            | C12orf30:miR-769-3p    |
| rs1985752  | chr12:111431809            | PTPN11:miR-496         |
| rs1061657  | chr12:113592519            | TBX3:miR-186           |
| rs12580748 | chr12:113593055            | TBX3:miR-561           |
| rs11542225 | chr12:114880967            | THRAP2:miR-382         |
| rs34718133 | chr12:114881037            | THRAP2:miR-617         |
| rs34718133 | chr12:114881037            | THRAP2:miR-384         |
| rs34607586 | chr12:116375768            | KSR2:miR-194           |
| rs34607586 | chr12:116375768            | KSR2:miR-144           |
| rs11313003 | chr12:117072897            | TAOK3:miR-515-5p       |
| rs11313003 | chr12:117072897            | TAOK3:miR-519e*        |
| rs1045542  | chr12:117339815            | SUDS3:miR-569          |
| rs35654900 | chr12:118608701            | CIT:miR-602            |
| rs1803429  | chr12:119498993            | RNF10:miR-642          |
| rs7976497  | chr12:119619850            | KIAA0152:miR-607       |
| rs11556442 | chr12:119620984            | KIAA0152:miR-558       |
| rs1803508  | chr12:119623915            | KIAA0152:miR-575       |
| rs1803508  | chr12:119623915            | KIAA0152:miR-9*        |
| rs2071708  | chr12:119645660            | MGC5139:miR-630        |
| rs11555969 | chr12:119686149            | SPPL3:miR-374          |
| rs35124190 | chr12:119686387            | SPPL3:miR-381          |
| rs12296508 | chr12:119686577            | SPPL3:miR-556          |
| rs1653586  | chr12:120159958            | CAMKK2:miR-511         |
| rs61953427 | chr12:120162736            | CAMKK2:miR-653         |
| rs61953427 | chr12:120162736            | CAMKK2:miR-570         |

**Supplemental Table 4: SNPs in miRNA target sites based on PITA prediction**

| <b>SNP</b> | <b>SNP Position (hg18)</b> | <b>PITA Prediction</b> |
|------------|----------------------------|------------------------|
| rs8462     | chr12:120346454            | RNF34:miR-589          |
| rs1046800  | chr12:121322636            | RSN:miR-373*           |
| rs35066972 | chr12:122459038            | SETD8:miR-493-5p       |
| rs10744162 | chr12:122809660            | ATP6V0A2:miR-200b      |
| rs10744162 | chr12:122809660            | ATP6V0A2:miR-200c      |
| rs3768     | chr12:123065792            | ZNF664:miR-194         |
| rs34710272 | chr12:130850210            | SFRS8:miR-629          |
| rs34590303 | chr12:131812750            | KIAA0692:miR-524       |
| rs34590303 | chr12:131812750            | KIAA0692:miR-525*      |
| rs9889     | chr13:19558472             | ZNF198:miR-609         |
| rs34490345 | chr13:19558795             | ZNF198:miR-382         |
| rs34490345 | chr13:19558795             | ZNF198:miR-186         |
| rs1050345  | chr13:20445204             | LATS2:miR-599          |
| rs546782   | chr13:21173946             | FGF9:miR-511           |
| rs546782   | chr13:21173946             | FGF9:miR-187           |
| rs9509843  | chr13:21174070             | FGF9:miR-493-3p        |
| rs9507304  | chr13:23794237             | MGC48915:miR-494       |
| rs4300488  | chr13:24719450             | MTMR6:miR-573          |
| rs34222418 | chr13:27018579             | LNX2:miR-154*          |
| rs34222418 | chr13:27018579             | LNX2:miR-487a          |
| rs34222418 | chr13:27018579             | LNX2:miR-377           |
| rs3203071  | chr13:27138772             | MGC9850:miR-29a        |
| rs3203071  | chr13:27138772             | MGC9850:miR-29b        |
| rs3203071  | chr13:27138772             | MGC9850:miR-29c        |
| rs3203071  | chr13:27138772             | MGC9850:miR-506        |
| rs3203071  | chr13:27138772             | MGC9850:miR-124a       |
| rs9554309  | chr13:27765180             | PAN3:miR-448           |
| rs10507381 | chr13:27766293             | PAN3:miR-422a          |
| rs58778671 | chr13:27775158             | FLT1:miR-518b          |
| rs58778671 | chr13:27775158             | FLT1:miR-518c          |
| rs58778671 | chr13:27775158             | FLT1:miR-518d          |
| rs17073849 | chr13:29237348             | UBL3:miR-383           |
| rs35457480 | chr13:29238025             | UBL3:miR-1             |
| rs35457480 | chr13:29238025             | UBL3:miR-206           |
| rs1058650  | chr13:29238585             | UBL3:miR-544           |
| rs4385989  | chr13:29239030             | UBL3:miR-19a           |
| rs4385989  | chr13:29239030             | UBL3:miR-19b           |
| rs9551867  | chr13:29676032             | KATNAL1:miR-186        |
| rs9551867  | chr13:29676032             | KATNAL1:miR-561        |
| rs10655695 | chr13:29676034             | KATNAL1:miR-186        |
| rs10655695 | chr13:29676034             | KATNAL1:miR-561        |
| rs35934555 | chr13:29676035             | KATNAL1:miR-561        |
| rs3493     | chr13:32247368             | APRIN:miR-644          |
| rs486763   | chr13:32575373             | STARD13:miR-493-5p     |
| rs9568845  | chr13:32576715             | STARD13:miR-130a       |
| rs9568845  | chr13:32576715             | STARD13:miR-130b       |
| rs9568845  | chr13:32576715             | STARD13:miR-301        |
| rs9568845  | chr13:32576715             | STARD13:miR-454-3p     |
| rs11618488 | chr13:35143721             | NBEA:miR-635           |
| rs35204316 | chr13:35143727             | NBEA:miR-635           |
| rs58088510 | chr13:35144221             | NBEA:miR-580           |
| rs403904   | chr13:35144233             | NBEA:miR-532           |

**Supplemental Table 4: SNPs in miRNA target sites based on PITA prediction**

| <b>SNP</b> | <b>SNP Position (hg18)</b> | <b>PITA Prediction</b> |
|------------|----------------------------|------------------------|
| rs403904   | chr13:35144233             | NBEA:miR-515-3p        |
| rs403904   | chr13:35144233             | NBEA:miR-519e          |
| rs403904   | chr13:35144233             | NBEA:miR-203           |
| rs45502300 | chr13:35144512             | NBEA:miR-190           |
| rs11559100 | chr13:36481776             | FAM48A:miR-581         |
| rs9594185  | chr13:36481812             | FAM48A:miR-373*        |
| rs945632   | chr13:36575622             | CSNK1A1L:miR-609       |
| rs34413117 | chr13:36575752             | CSNK1A1L:miR-299-3p    |
| rs1336754  | chr13:36575995             | CSNK1A1L:miR-429       |
| rs1043348  | chr13:38482373             | C13orf23:miR-202*      |
| rs17226809 | chr13:38482916             | C13orf23:miR-29a       |
| rs17226809 | chr13:38482916             | C13orf23:miR-29b       |
| rs17226809 | chr13:38482916             | C13orf23:miR-29c       |
| rs34241243 | chr13:40027924             | FOXO1A:miR-584         |
| rs34241243 | chr13:40027924             | FOXO1A:miR-135a        |
| rs34241243 | chr13:40027924             | FOXO1A:miR-135b        |
| rs17090557 | chr13:40281861             | SLC25A15:miR-125a      |
| rs17090557 | chr13:40281861             | SLC25A15:miR-125b      |
| rs9562242  | chr13:40404230             | ELF1:miR-561           |
| rs57316488 | chr13:40404238             | ELF1:miR-561           |
| rs41286987 | chr13:40404281             | ELF1:miR-494           |
| rs41286987 | chr13:40404281             | ELF1:miR-641           |
| rs34635680 | chr13:40600747             | KBTBD6:miR-581         |
| rs11549103 | chr13:41794913             | AKAP11:miR-548d        |
| rs11692    | chr13:43905697             | TSC22D1:miR-130a       |
| rs11692    | chr13:43905697             | TSC22D1:miR-130b       |
| rs11692    | chr13:43905697             | TSC22D1:miR-301        |
| rs11692    | chr13:43905697             | TSC22D1:miR-454-3p     |
| rs3209354  | chr13:43905794             | TSC22D1:miR-370        |
| rs12044    | chr13:43905896             | TSC22D1:miR-646        |
| rs11552475 | chr13:44809388             | TPT1:miR-488           |
| rs9595340  | chr13:45008385             | COG3:miR-655           |
| rs9595340  | chr13:45008385             | COG3:miR-369-3p        |
| rs9595340  | chr13:45008385             | COG3:miR-374           |
| rs9595340  | chr13:45008385             | COG3:miR-380-3p        |
| rs17069218 | chr13:46306351             | HTR2A:miR-203          |
| rs9332306  | chr13:47733646             | ITM2B:miR-488          |
| rs1804276  | chr13:47953886             | RB1:miR-216            |
| rs3720     | chr13:49171604             | KPNA3:miR-141          |
| rs3720     | chr13:49171604             | KPNA3:miR-200a         |
| rs3720     | chr13:49171604             | KPNA3:miR-429          |
| rs1043729  | chr13:49171832             | KPNA3:miR-19a          |
| rs1043729  | chr13:49171832             | KPNA3:miR-19b          |
| rs17073314 | chr13:49171834             | KPNA3:miR-19a          |
| rs17073314 | chr13:49171834             | KPNA3:miR-19b          |
| rs34283770 | chr13:49173336             | KPNA3:let-7a           |
| rs34283770 | chr13:49173336             | KPNA3:let-7b           |
| rs34283770 | chr13:49173336             | KPNA3:let-7c           |
| rs34283770 | chr13:49173336             | KPNA3:let-7d           |
| rs34283770 | chr13:49173336             | KPNA3:let-7f           |
| rs34283770 | chr13:49173336             | KPNA3:let-7g           |
| rs34283770 | chr13:49173336             | KPNA3:let-7i           |

**Supplemental Table 4: SNPs in miRNA target sites based on PITA prediction**

| <b>SNP</b> | <b>SNP Position (hg18)</b> | <b>PITA Prediction</b> |
|------------|----------------------------|------------------------|
| rs34283770 | chr13:49173336             | KPNA3:miR-98           |
| rs34283770 | chr13:49173336             | KPNA3:miR-196a         |
| rs34283770 | chr13:49173336             | KPNA3:miR-196b         |
| rs34283770 | chr13:49173336             | KPNA3:miR-140          |
| rs58793413 | chr13:49173353             | KPNA3:miR-21           |
| rs7446     | chr13:49173516             | KPNA3:miR-217          |
| rs61959958 | chr13:49173576             | KPNA3:miR-148a         |
| rs35653957 | chr13:49386413             | C13orf1:miR-567        |
| rs1043208  | chr13:49490573             | RFP2:miR-410           |
| rs9805470  | chr13:50837391             | INTS6:miR-802          |
| rs1054779  | chr13:51501589             | LOC440138:miR-484      |
| rs41292810 | chr13:51885740             | VPS36:miR-186          |
| rs17541412 | chr13:52175673             | LECT1:miR-9            |
| rs60093151 | chr13:57197446             | PCDH17:miR-515-3p      |
| rs61961930 | chr13:57199853             | PCDH17:miR-410         |
| rs17059792 | chr13:60882975             | PCDH20:miR-22          |
| rs1536943  | chr13:69173286             | KLHL1:miR-576          |
| rs2307763  | chr13:70910731             | DACH1:miR-410          |
| rs2307763  | chr13:70910731             | DACH1:miR-495          |
| rs59415221 | chr13:70910735             | DACH1:miR-495          |
| rs59415221 | chr13:70910735             | DACH1:miR-552          |
| rs7931     | chr13:72182412             | LOC440145:miR-498      |
| rs7931     | chr13:72182412             | LOC440145:miR-607      |
| rs41286082 | chr13:72548365             | KLF5:miR-141           |
| rs41286082 | chr13:72548365             | KLF5:miR-200a          |
| rs41286082 | chr13:72548365             | KLF5:miR-429           |
| rs35492941 | chr13:72548758             | KLF5:miR-561           |
| rs34182652 | chr13:73162399             | KLF12:miR-580          |
| rs41286098 | chr13:73166801             | KLF12:miR-542-3p       |
| rs1058841  | chr13:74756895             | TBC1D4:miR-103         |
| rs1058841  | chr13:74756895             | TBC1D4:miR-107         |
| rs2274048  | chr13:75078043             | UCHL3:miR-569          |
| rs1043353  | chr13:75330427             | LMO7:miR-142-5p        |
| rs6835     | chr13:76352482             | KCTD12:miR-539         |
| rs56678589 | chr13:76355460             | KCTD12:miR-570         |
| rs1062733  | chr13:76477491             | FBXL3:miR-573          |
| rs1062733  | chr13:76477491             | FBXL3:miR-542-3p       |
| rs6562980  | chr13:76477997             | FBXL3:miR-338          |
| rs826432   | chr13:76478833             | FBXL3:miR-520g         |
| rs826432   | chr13:76478833             | FBXL3:miR-520h         |
| rs826432   | chr13:76478833             | FBXL3:miR-106a         |
| rs826432   | chr13:76478833             | FBXL3:miR-106b         |
| rs826432   | chr13:76478833             | FBXL3:miR-17-5p        |
| rs826432   | chr13:76478833             | FBXL3:miR-20a          |
| rs826432   | chr13:76478833             | FBXL3:miR-20b          |
| rs1057821  | chr13:76478924             | FBXL3:miR-519a         |
| rs1057821  | chr13:76478924             | FBXL3:miR-519b         |
| rs1057821  | chr13:76478924             | FBXL3:miR-519c         |
| rs55781153 | chr13:77235790             | FLJ30046:miR-559       |
| rs3027094  | chr13:77368790             | EDNRB:miR-25           |
| rs3027094  | chr13:77368790             | EDNRB:miR-367          |
| rs3027094  | chr13:77368790             | EDNRB:miR-92           |

**Supplemental Table 4: SNPs in miRNA target sites based on PITA prediction**

| <b>SNP</b> | <b>SNP Position (hg18)</b> | <b>PITA Prediction</b> |
|------------|----------------------------|------------------------|
| rs3027094  | chr13:77368790             | EDNRB:miR-92b          |
| rs3027094  | chr13:77368790             | EDNRB:miR-33           |
| rs9601092  | chr13:78072092             | POU4F1:miR-188         |
| rs34314729 | chr13:78792564             | C13orf10:miR-573       |
| rs4414367  | chr13:78792722             | C13orf10:miR-182*      |
| rs1212082  | chr13:79024769             | NDFIP2:miR-511         |
| rs59945183 | chr13:79024809             | NDFIP2:miR-522         |
| rs1054544  | chr13:85265010             | SLITRK6:miR-568        |
| rs7998922  | chr13:85265011             | SLITRK6:miR-568        |
| rs34421625 | chr13:87129243             | SLITRK5:miR-142-5p     |
| rs9584224  | chr13:93853727             | GPC6:miR-539           |
| rs61965610 | chr13:94077468             | GPR180:miR-25          |
| rs61965610 | chr13:94077468             | GPR180:miR-367         |
| rs61965610 | chr13:94077468             | GPR180:miR-92          |
| rs61965610 | chr13:94077468             | GPR180:miR-92b         |
| rs9556713  | chr13:96843159             | MBNL2:miR-181a         |
| rs9556713  | chr13:96843159             | MBNL2:miR-181c         |
| rs35709582 | chr13:96843404             | MBNL2:miR-101          |
| rs35709582 | chr13:96843404             | MBNL2:miR-374          |
| rs15004    | chr13:96844147             | MBNL2:miR-1            |
| rs15004    | chr13:96844147             | MBNL2:miR-206          |
| rs15004    | chr13:96844147             | MBNL2:miR-203          |
| rs59086037 | chr13:96915153             | RAP2A:miR-28           |
| rs57530477 | chr13:96915773             | RAP2A:miR-519d         |
| rs1054272  | chr13:97473200             | RANBP5:miR-539         |
| rs34294450 | chr13:99413941             | ZIC5:miR-591           |
| rs3825508  | chr13:99414155             | ZIC5:miR-609           |
| rs12869870 | chr13:99415306             | ZIC5:miR-34a           |
| rs12869870 | chr13:99415306             | ZIC5:miR-34c           |
| rs12869870 | chr13:99415306             | ZIC5:miR-449           |
| rs12869870 | chr13:99415306             | ZIC5:miR-449b          |
| rs5806318  | chr13:102129145            | TPP2:miR-186           |
| rs4743     | chr13:102291826            | BIVM:miR-802           |
| rs4743     | chr13:102291826            | BIVM:miR-573           |
| rs56077446 | chr13:105940500            | EFNB2:miR-548d         |
| rs5806589  | chr13:105941293            | EFNB2:miR-221          |
| rs15449    | chr13:105993755            | FLJ10154:miR-577       |
| rs1059417  | chr13:105993807            | FLJ10154:miR-571       |
| rs1059417  | chr13:105993807            | FLJ10154:miR-380-5p    |
| rs10555    | chr13:106619235            | LOC728215:miR-205      |
| rs61965355 | chr13:106619307            | LOC728215:miR-1        |
| rs61965355 | chr13:106619307            | LOC728215:miR-206      |
| rs9587306  | chr13:106619837            | LOC728215:miR-27a      |
| rs9587306  | chr13:106619837            | LOC728215:miR-27b      |
| rs9587306  | chr13:106619837            | LOC728215:miR-128a     |
| rs9587306  | chr13:106619837            | LOC728215:miR-128b     |
| rs34538955 | chr13:107684190            | ABHD13:miR-651         |
| rs35583153 | chr13:107684251            | ABHD13:miR-183         |
| rs2289046  | chr13:109205907            | IRS2:miR-582           |
| rs1063196  | chr13:110170986            | ING1:miR-410           |
| rs56018333 | chr13:110743058            | ARHGEF7:miR-96         |
| rs34561530 | chr13:111772721            | SOX1:miR-17-3p         |

**Supplemental Table 4: SNPs in miRNA target sites based on PITA prediction**

| <b>SNP</b> | <b>SNP Position (hg18)</b> | <b>PITA Prediction</b> |
|------------|----------------------------|------------------------|
| rs4907484  | chr13:112792371            | MCF2L:miR-185          |
| rs4907484  | chr13:112792371            | MCF2L:miR-765          |
| rs9603825  | chr13:113025561            | LAMP1:miR-577          |
| rs9603825  | chr13:113025561            | LAMP1:miR-559          |
| rs3945894  | chr13:113025567            | LAMP1:miR-577          |
| rs3833987  | chr13:113025570            | LAMP1:miR-577          |
| rs11545598 | chr13:113342887            | TFDP1:miR-545          |
| rs1760943  | chr14:19996539             | TMEM55B:miR-564        |
| rs3207462  | chr14:20628244             | ZNF219:miR-545         |
| rs1064879  | chr14:20748937             | HNRPC:miR-548d         |
| rs1064971  | chr14:20749127             | HNRPC:miR-620          |
| rs2295864  | chr14:20889690             | SUPT16H:miR-515-5p     |
| rs2295864  | chr14:20889690             | SUPT16H:miR-519e*      |
| rs36040169 | chr14:21036139             | C14orf92:miR-30a-5p    |
| rs36040169 | chr14:21036139             | C14orf92:miR-30b       |
| rs36040169 | chr14:21036139             | C14orf92:miR-30c       |
| rs36040169 | chr14:21036139             | C14orf92:miR-30d       |
| rs36040169 | chr14:21036139             | C14orf92:miR-30e-5p    |
| rs1124981  | chr14:21060377             | SALL2:miR-765          |
| rs35323339 | chr14:22312299             | SLC7A7:miR-338         |
| rs35323339 | chr14:22312299             | SLC7A7:miR-770-5p      |
| rs45452091 | chr14:22312324             | SLC7A7:miR-518f*       |
| rs45452091 | chr14:22312324             | SLC7A7:miR-526a        |
| rs45452091 | chr14:22312324             | SLC7A7:miR-526c        |
| rs1052922  | chr14:22597707             | ACIN1:miR-363*         |
| rs34164276 | chr14:22864523             | PABPN1:miR-515-5p      |
| rs34164276 | chr14:22864523             | PABPN1:miR-519e*       |
| rs14947    | chr14:22864823             | PABPN1:miR-765         |
| rs10131673 | chr14:23107290             | JPH4:miR-583           |
| rs2281681  | chr14:23107823             | JPH4:miR-552           |
| rs14930    | chr14:23677846             | PSME1:miR-204          |
| rs14930    | chr14:23677846             | PSME1:miR-211          |
| rs56815700 | chr14:23966458             | CBLN3:miR-484          |
| rs1043831  | chr14:23979202             | KIAA0323:miR-128a      |
| rs1043831  | chr14:23979202             | KIAA0323:miR-128b      |
| rs17844876 | chr14:23979203             | KIAA0323:miR-128a      |
| rs17844876 | chr14:23979203             | KIAA0323:miR-128b      |
| rs35580864 | chr14:23979298             | KIAA0323:miR-615       |
| rs1042761  | chr14:28308250             | FOXG1B:miR-519a        |
| rs1042761  | chr14:28308250             | FOXG1B:miR-519b        |
| rs1042761  | chr14:28308250             | FOXG1B:miR-519c        |
| rs1042762  | chr14:28308306             | FOXG1B:miR-142-3p      |
| rs1042762  | chr14:28308306             | FOXG1B:miR-34a         |
| rs1042762  | chr14:28308306             | FOXG1B:miR-34c         |
| rs1042762  | chr14:28308306             | FOXG1B:miR-449         |
| rs1042762  | chr14:28308306             | FOXG1B:miR-449b        |
| rs45569242 | chr14:29115767             | PRKD1:miR-375          |
| rs45569242 | chr14:29115767             | PRKD1:miR-376a         |
| rs45569242 | chr14:29115767             | PRKD1:miR-376b         |
| rs34255465 | chr14:30433865             | STRN3:miR-559          |
| rs11152    | chr14:30639168             | HECTD1:miR-381         |
| rs11152    | chr14:30639168             | HECTD1:miR-524*        |

**Supplemental Table 4: SNPs in miRNA target sites based on PITA prediction**

| <b>SNP</b> | <b>SNP Position (hg18)</b> | <b>PITA Prediction</b> |
|------------|----------------------------|------------------------|
| rs45441195 | chr14:31694667             | ARHGAP5:miR-517b       |
| rs36216228 | chr14:32369039             | AKAP6:miR-196a         |
| rs36216228 | chr14:32369039             | AKAP6:miR-196b         |
| rs11156819 | chr14:33464484             | EGLN3:miR-498          |
| rs11156819 | chr14:33464484             | EGLN3:miR-607          |
| rs1680709  | chr14:33464637             | EGLN3:miR-562          |
| rs9789     | chr14:34251537             | CFL2:miR-586           |
| rs9789     | chr14:34251537             | CFL2:miR-33            |
| rs45511494 | chr14:34291763             | BAZ1A:miR-320          |
| rs3062551  | chr14:34291902             | BAZ1A:miR-589          |
| rs34923805 | chr14:34292147             | BAZ1A:miR-802          |
| rs2296919  | chr14:35075410             | INSM2:miR-514          |
| rs56670738 | chr14:36055788             | TITF1:miR-548c         |
| rs11847165 | chr14:36216226             | PAX9:miR-601           |
| rs12436157 | chr14:36219034             | SLC25A21:miR-548d      |
| rs12436157 | chr14:36219034             | SLC25A21:miR-421       |
| rs1052944  | chr14:37129580             | FOXA1:miR-580          |
| rs1052944  | chr14:37129580             | FOXA1:miR-1            |
| rs1052944  | chr14:37129580             | FOXA1:miR-206          |
| rs911822   | chr14:37130178             | FOXA1:miR-210          |
| rs35689225 | chr14:37130201             | FOXA1:miR-522          |
| rs2699     | chr14:37130249             | FOXA1:miR-140          |
| rs3814860  | chr14:38938397             | FBXO33:miR-323         |
| rs58836600 | chr14:44466721             | BTBD5:miR-1            |
| rs58836600 | chr14:44466721             | BTBD5:miR-206          |
| rs1053667  | chr14:44612788             | KIAA0423:miR-19a       |
| rs1053667  | chr14:44612788             | KIAA0423:miR-19b       |
| rs11552723 | chr14:44613210             | KIAA0423:miR-561       |
| rs1235     | chr14:46379246             | MAMDC1:miR-223         |
| rs11844549 | chr14:46380733             | MAMDC1:miR-199a        |
| rs11844549 | chr14:46380733             | MAMDC1:miR-199b        |
| rs56294762 | chr14:49320706             | SDCCAG1:miR-659        |
| rs56294762 | chr14:49320706             | SDCCAG1:miR-579        |
| rs15382    | chr14:49431088             | ARF6:miR-577           |
| rs1045637  | chr14:49654664             | SOS2:miR-576           |
| rs45576933 | chr14:50263772             | NIN:miR-144            |
| rs1803417  | chr14:51541391             | NID2:miR-383           |
| rs2474658  | chr14:51541694             | NID2:miR-382           |
| rs6696     | chr14:52264169             | PSMC6:miR-126*         |
| rs61983162 | chr14:53486372             | BMP4:miR-577           |
| rs10220437 | chr14:53964046             | CNIH:let-7a            |
| rs10220437 | chr14:53964046             | CNIH:let-7b            |
| rs10220437 | chr14:53964046             | CNIH:let-7c            |
| rs10220437 | chr14:53964046             | CNIH:let-7d            |
| rs10220437 | chr14:53964046             | CNIH:let-7f            |
| rs10220437 | chr14:53964046             | CNIH:let-7g            |
| rs10220437 | chr14:53964046             | CNIH:let-7i            |
| rs10220437 | chr14:53964046             | CNIH:miR-98            |
| rs8016671  | chr14:53964131             | CNIH:miR-299-3p        |
| rs11552807 | chr14:53964236             | CNIH:miR-140           |
| rs1134761  | chr14:54011483             | GMFB:miR-199a          |
| rs1134761  | chr14:54011483             | GMFB:miR-199b          |



**Supplemental Table 4: SNPs in miRNA target sites based on PITA prediction**

| <b>SNP</b> | <b>SNP Position (hg18)</b> | <b>PITA Prediction</b> |
|------------|----------------------------|------------------------|
| rs10144957 | chr14:54583207             | SOCS4:miR-577          |
| rs10144957 | chr14:54583207             | SOCS4:miR-559          |
| rs45589533 | chr14:54605757             | C14orf32:miR-519a      |
| rs45589533 | chr14:54605757             | C14orf32:miR-519b      |
| rs45589533 | chr14:54605757             | C14orf32:miR-519c      |
| rs1045004  | chr14:54889544             | FBXO34:miR-513         |
| rs17128429 | chr14:54889553             | FBXO34:miR-30a-5p      |
| rs17128429 | chr14:54889553             | FBXO34:miR-30b         |
| rs17128429 | chr14:54889553             | FBXO34:miR-30c         |
| rs17128429 | chr14:54889553             | FBXO34:miR-30d         |
| rs17128429 | chr14:54889553             | FBXO34:miR-30e-5p      |
| rs11438404 | chr14:55834806             | PELI2:miR-181b         |
| rs11438404 | chr14:55834806             | PELI2:miR-181d         |
| rs11438404 | chr14:55834806             | PELI2:miR-574          |
| rs11438404 | chr14:55834806             | PELI2:miR-15a          |
| rs11438404 | chr14:55834806             | PELI2:miR-15b          |
| rs11438404 | chr14:55834806             | PELI2:miR-16           |
| rs11438404 | chr14:55834806             | PELI2:miR-195          |
| rs11438404 | chr14:55834806             | PELI2:miR-497          |
| rs33981994 | chr14:55834807             | PELI2:miR-181b         |
| rs33981994 | chr14:55834807             | PELI2:miR-181d         |
| rs33981994 | chr14:55834807             | PELI2:miR-574          |
| rs33981994 | chr14:55834807             | PELI2:miR-15a          |
| rs33981994 | chr14:55834807             | PELI2:miR-15b          |
| rs33981994 | chr14:55834807             | PELI2:miR-16           |
| rs33981994 | chr14:55834807             | PELI2:miR-195          |
| rs33981994 | chr14:55834807             | PELI2:miR-497          |
| rs3841299  | chr14:55834808             | PELI2:miR-181b         |
| rs3841299  | chr14:55834808             | PELI2:miR-181d         |
| rs3841299  | chr14:55834808             | PELI2:miR-574          |
| rs3841299  | chr14:55834808             | PELI2:miR-15a          |
| rs3841299  | chr14:55834808             | PELI2:miR-15b          |
| rs3841299  | chr14:55834808             | PELI2:miR-16           |
| rs3841299  | chr14:55834808             | PELI2:miR-195          |
| rs3841299  | chr14:55834808             | PELI2:miR-497          |
| rs33925820 | chr14:55834809             | PELI2:miR-15a          |
| rs33925820 | chr14:55834809             | PELI2:miR-15b          |
| rs33925820 | chr14:55834809             | PELI2:miR-16           |
| rs33925820 | chr14:55834809             | PELI2:miR-195          |
| rs33925820 | chr14:55834809             | PELI2:miR-497          |
| rs57390094 | chr14:56337240             | OTX2:miR-448           |
| rs56245644 | chr14:56337529             | OTX2:miR-548b          |
| rs45464393 | chr14:56740243             | EXOC5:miR-199a*        |
| rs36026244 | chr14:56946196             | NAT12:miR-186          |
| rs3825621  | chr14:56946595             | NAT12:miR-143          |
| rs3825621  | chr14:56946595             | NAT12:miR-548a         |
| rs3825621  | chr14:56946595             | NAT12:miR-9*           |
| rs8008483  | chr14:56946989             | NAT12:miR-491          |
| rs12882994 | chr14:60249167             | SIX4:miR-652           |
| rs12882994 | chr14:60249167             | SIX4:miR-566           |
| rs12884102 | chr14:60249169             | SIX4:miR-566           |
| rs12884102 | chr14:60249169             | SIX4:miR-185           |

**Supplemental Table 4: SNPs in miRNA target sites based on PITA prediction**

| <b>SNP</b> | <b>SNP Position (hg18)</b> | <b>PITA Prediction</b> |
|------------|----------------------------|------------------------|
| rs7145317  | chr14:60249190             | SIX4:miR-559           |
| rs7145317  | chr14:60249190             | SIX4:miR-577           |
| rs33930665 | chr14:61283683             | HIF1A:miR-383          |
| rs41398644 | chr14:61283686             | HIF1A:miR-383          |
| rs17099190 | chr14:61283927             | HIF1A:miR-433          |
| rs8019084  | chr14:61284203             | HIF1A:miR-135a         |
| rs8019084  | chr14:61284203             | HIF1A:miR-135b         |
| rs8019084  | chr14:61284203             | HIF1A:miR-522          |
| rs45487994 | chr14:63221119             | SGPP1:miR-25           |
| rs45487994 | chr14:63221119             | SGPP1:miR-367          |
| rs45487994 | chr14:63221119             | SGPP1:miR-92           |
| rs45487994 | chr14:63221119             | SGPP1:miR-92b          |
| rs17852278 | chr14:64613021             | MAX:miR-615            |
| rs17852278 | chr14:64613021             | MAX:miR-296            |
| rs1054218  | chr14:65278943             | FUT8:miR-522           |
| rs57228058 | chr14:65279208             | FUT8:miR-599           |
| rs11539273 | chr14:65279231             | FUT8:miR-767-5p        |
| rs11539356 | chr14:66874602             | ATP6V1D:miR-542-3p     |
| rs17104363 | chr14:67009236             | C14orf83:miR-769-5p    |
| rs11547223 | chr14:67125958             | PLEKHH1:miR-30a-3p     |
| rs11547223 | chr14:67125958             | PLEKHH1:miR-30e-3p     |
| rs11547223 | chr14:67125958             | PIGH:miR-429           |
| rs1802342  | chr14:67187915             | ARG2:miR-550           |
| rs12879105 | chr14:67284541             | ZFYVE26:miR-559        |
| rs35948063 | chr14:68014257             | RAD51L1:miR-424        |
| rs35948063 | chr14:68014257             | RAD51L1:miR-340        |
| rs1054993  | chr14:68410836             | ACTN1:miR-552          |
| rs11557771 | chr14:68410996             | ACTN1:miR-218          |
| rs3209273  | chr14:68411038             | ACTN1:miR-19a          |
| rs3209273  | chr14:68411038             | ACTN1:miR-19b          |
| rs1128941  | chr14:68587421             | WDR22:miR-448          |
| rs2604305  | chr14:68916706             | ERH:miR-409-3p         |
| rs17115408 | chr14:69307958             | SFRS5:miR-296          |
| rs3208848  | chr14:69308012             | SFRS5:miR-361          |
| rs3208849  | chr14:69308083             | SFRS5:miR-524*         |
| rs3208849  | chr14:69308083             | SFRS5:miR-520d*        |
| rs184477   | chr14:69580879             | SLC8A3:miR-599         |
| rs184477   | chr14:69580879             | SLC8A3:miR-592         |
| rs7148305  | chr14:69906349             | SYNJ2BP:miR-380-3p     |
| rs35633884 | chr14:70209070             | TTC9:miR-302a          |
| rs35633884 | chr14:70209070             | TTC9:miR-302b          |
| rs35633884 | chr14:70209070             | TTC9:miR-302c          |
| rs35633884 | chr14:70209070             | TTC9:miR-302d          |
| rs35633884 | chr14:70209070             | TTC9:miR-373           |
| rs35633884 | chr14:70209070             | TTC9:miR-520a          |
| rs35633884 | chr14:70209070             | TTC9:miR-520b          |
| rs35633884 | chr14:70209070             | TTC9:miR-520c          |
| rs35633884 | chr14:70209070             | TTC9:miR-520d          |
| rs35633884 | chr14:70209070             | TTC9:miR-520e          |
| rs35633884 | chr14:70209070             | TTC9:miR-526b*         |
| rs35633884 | chr14:70209070             | TTC9:miR-106a          |
| rs35633884 | chr14:70209070             | TTC9:miR-106b          |

**Supplemental Table 4: SNPs in miRNA target sites based on PITA prediction**

| <b>SNP</b> | <b>SNP Position (hg18)</b> | <b>PITA Prediction</b> |
|------------|----------------------------|------------------------|
| rs35633884 | chr14:70209070             | TTC9:miR-17-5p         |
| rs35633884 | chr14:70209070             | TTC9:miR-20a           |
| rs35633884 | chr14:70209070             | TTC9:miR-20b           |
| rs45479600 | chr14:70651801             | PCNX:miR-429           |
| rs1064612  | chr14:72656300             | RBM25:miR-583          |
| rs1801974  | chr14:73822503             | ABCD4:miR-522          |
| rs11541545 | chr14:74372406             | YLPM1:miR-539          |
| rs1046384  | chr14:74372500             | YLPM1:miR-625          |
| rs1046384  | chr14:74372500             | YLPM1:miR-765          |
| rs17493927 | chr14:74614202             | C14orf140:miR-431      |
| rs15157    | chr14:74668000             | TMED10:miR-568         |
| rs15157    | chr14:74668000             | TMED10:miR-605         |
| rs15156    | chr14:74668012             | TMED10:miR-455         |
| rs1804659  | chr14:74670876             | TMED10:miR-583         |
| rs12528    | chr14:74671038             | TMED10:miR-510         |
| rs12527    | chr14:74671041             | TMED10:miR-510         |
| rs45628236 | chr14:74818296             | FOS:miR-199a*          |
| rs4645858  | chr14:74818361             | FOS:miR-511            |
| rs4645858  | chr14:74818361             | FOS:miR-187            |
| rs10623682 | chr14:76560944             | C14orf4:miR-589        |
| rs10623682 | chr14:76560944             | C14orf4:miR-570        |
| rs35238200 | chr14:76560945             | C14orf4:miR-589        |
| rs35238200 | chr14:76560945             | C14orf4:miR-570        |
| rs35725244 | chr14:77012124             | THSD3:miR-612          |
| rs45542336 | chr14:79399000             | NRXN3:miR-363*         |
| rs35874905 | chr14:79399487             | NRXN3:miR-302b*        |
| rs35537321 | chr14:79399495             | NRXN3:miR-499          |
| rs12879016 | chr14:79399885             | NRXN3:miR-328          |
| rs56003521 | chr14:80033136             | C14orf145:miR-625      |
| rs56003521 | chr14:80033136             | C14orf145:miR-185      |
| rs33941291 | chr14:80033137             | C14orf145:miR-185      |
| rs2288495  | chr14:80681672             | TSHR:miR-517*          |
| rs58574729 | chr14:81012670             | SEL1L:miR-223          |
| rs45443995 | chr14:85161439             | FLRT2:miR-641          |
| rs45443995 | chr14:85161439             | FLRT2:miR-583          |
| rs17094456 | chr14:85163175             | FLRT2:miR-205          |
| rs11131    | chr14:85163937             | FLRT2:miR-595          |
| rs11548716 | chr14:88692401             | FOXN3:miR-182          |
| rs12889591 | chr14:88693073             | FOXN3:miR-299-5p       |
| rs12889771 | chr14:88693156             | FOXN3:miR-450          |
| rs12889348 | chr14:88693199             | FOXN3:miR-488          |
| rs15414    | chr14:89944277             | CALM1:miR-454-5p       |
| rs15414    | chr14:89944277             | CALM1:miR-133a         |
| rs15414    | chr14:89944277             | CALM1:miR-133b         |
| rs1053461  | chr14:90407080             | RPS6KA5:miR-561        |
| rs17127097 | chr14:90407216             | RPS6KA5:miR-204        |
| rs17127097 | chr14:90407216             | RPS6KA5:miR-211        |
| rs34712536 | chr14:90430253             | RPS6KA5:miR-142-5p     |
| rs4904783  | chr14:90994048             | KIAA2010:miR-146a      |
| rs4904783  | chr14:90994048             | KIAA2010:miR-146b      |
| rs35979920 | chr14:91505736             | TRIP11:miR-106a        |
| rs35979920 | chr14:91505736             | TRIP11:miR-106b        |

**Supplemental Table 4: SNPs in miRNA target sites based on PITA prediction**

| <b>SNP</b> | <b>SNP Position (hg18)</b> | <b>PITA Prediction</b> |
|------------|----------------------------|------------------------|
| rs35979920 | chr14:91505736             | TRIP11:miR-17-5p       |
| rs35979920 | chr14:91505736             | TRIP11:miR-20a         |
| rs35979920 | chr14:91505736             | TRIP11:miR-20b         |
| rs34148613 | chr14:91600139             | ATXN3:miR-190          |
| rs7156335  | chr14:92475985             | ITPK1:miR-620          |
| rs11621915 | chr14:92763584             | C14orf130:miR-767-5p   |
| rs34494032 | chr14:92776468             | BTBD7:miR-513          |
| rs61698538 | chr14:92777965             | BTBD7:miR-509          |
| rs11388740 | chr14:94625148             | DICER1:miR-186         |
| rs56033032 | chr14:96101306             | PAPOLA:miR-619         |
| rs56033032 | chr14:96101306             | PAPOLA:miR-490         |
| rs7492490  | chr14:96101752             | PAPOLA:miR-378         |
| rs56132905 | chr14:96103013             | PAPOLA:miR-224         |
| rs12147717 | chr14:96103097             | PAPOLA:miR-559         |
| rs3918125  | chr14:99046971             | CCNK:miR-33            |
| rs3918125  | chr14:99046971             | CCNK:miR-517a          |
| rs3918125  | chr14:99046971             | CCNK:miR-517c          |
| rs1044620  | chr14:99476524             | EML1:miR-758           |
| rs1044620  | chr14:99476524             | EML1:miR-630           |
| rs1065377  | chr14:99680149             | EVL:miR-185            |
| rs1065377  | chr14:99680149             | EVL:miR-625            |
| rs58262953 | chr14:99814408             | YY1:miR-34a            |
| rs58262953 | chr14:99814408             | YY1:miR-34c            |
| rs58262953 | chr14:99814408             | YY1:miR-449            |
| rs58262953 | chr14:99814408             | YY1:miR-449b           |
| rs35946432 | chr14:101463674            | PPP2R5C:miR-432        |
| rs35659612 | chr14:101759644            | WDR20:miR-369-3p       |
| rs35659612 | chr14:101759644            | WDR20:miR-374          |
| rs35659612 | chr14:101759644            | WDR20:miR-380-3p       |
| rs6478     | chr14:101759646            | WDR20:miR-369-3p       |
| rs6478     | chr14:101759646            | WDR20:miR-374          |
| rs6478     | chr14:101759646            | WDR20:miR-380-3p       |
| rs11704    | chr14:101878408            | C14orf131:miR-23a      |
| rs11704    | chr14:101878408            | C14orf131:miR-23b      |
| rs11303    | chr14:102879065            | EIF5:miR-671           |
| rs11303    | chr14:102879065            | EIF5:miR-518f*         |
| rs11303    | chr14:102879065            | EIF5:miR-526a          |
| rs11303    | chr14:102879065            | EIF5:miR-526c          |
| rs35965972 | chr14:103221895            | KNS2:miR-583           |
| rs1133050  | chr14:104297037            | SIVA1:miR-19a          |
| rs1133050  | chr14:104297037            | SIVA1:miR-19b          |
| rs34252654 | chr14:104548225            | CDCA4:miR-616          |
| rs35963377 | chr14:104932125            | PACS2:miR-613          |
| rs35963377 | chr14:104932125            | PACS2:miR-203          |
| rs12881576 | chr14:105007911            | MTA1:miR-421           |
| rs12881576 | chr14:105007911            | MTA1:miR-302b*         |
| rs1132457  | chr14:105007912            | MTA1:miR-421           |
| rs1132457  | chr14:105007912            | MTA1:miR-302b*         |
| rs548      | chr15:20425225             | TUBGCP5:miR-1          |
| rs548      | chr15:20425225             | TUBGCP5:miR-206        |
| rs35420735 | chr15:20556821             | NIPA2:miR-610          |
| rs1722807  | chr15:21482216             | NDN:miR-223            |

**Supplemental Table 4: SNPs in miRNA target sites based on PITA prediction**

| <b>SNP</b> | <b>SNP Position (hg18)</b> | <b>PITA Prediction</b> |
|------------|----------------------------|------------------------|
| rs34821249 | chr15:22478544             | C15orf2:miR-320        |
| rs34821249 | chr15:22478544             | C15orf2:miR-548a       |
| rs34821249 | chr15:22478544             | C15orf2:miR-146a       |
| rs34821249 | chr15:22478544             | C15orf2:miR-146b       |
| rs34310223 | chr15:22773209             | SNURF:miR-571          |
| rs2628634  | chr15:23475502             | ATP10A:miR-384         |
| rs1802413  | chr15:26029990             | HERC2:miR-501          |
| rs28733236 | chr15:29456394             | KLF13:miR-577          |
| rs3743103  | chr15:30812919             | GREM1:miR-569          |
| rs1137095  | chr15:32458584             | GOLGA8A:miR-33b        |
| rs1137094  | chr15:32458585             | GOLGA8A:miR-33b        |
| rs7727     | chr15:32458730             | GOLGA8A:miR-571        |
| rs1059886  | chr15:32459510             | GOLGA8A:miR-25         |
| rs1059886  | chr15:32459510             | GOLGA8A:miR-367        |
| rs1059886  | chr15:32459510             | GOLGA8A:miR-92         |
| rs1059886  | chr15:32459510             | GOLGA8A:miR-92b        |
| rs1059886  | chr15:32459510             | GOLGA8A:miR-139        |
| rs1059886  | chr15:32459510             | GOLGA8A:miR-27a        |
| rs1059886  | chr15:32459510             | GOLGA8A:miR-27b        |
| rs3538     | chr15:32604799             | GOLGA8B:miR-23a        |
| rs3538     | chr15:32604799             | GOLGA8B:miR-23b        |
| rs3538     | chr15:32604799             | GOLGA8B:miR-323        |
| rs57021600 | chr15:32605685             | GOLGA8B:miR-190        |
| rs36106641 | chr15:32605705             | GOLGA8B:miR-655        |
| rs4041349  | chr15:32605705             | GOLGA8B:miR-655        |
| rs36106641 | chr15:32605705             | GOLGA8B:miR-586        |
| rs4041349  | chr15:32605705             | GOLGA8B:miR-586        |
| rs4144689  | chr15:32606811             | GOLGA8B:miR-527        |
| rs34079057 | chr15:36432216             | SPRED1:miR-630         |
| rs57589132 | chr15:36432816             | SPRED1:miR-142-3p      |
| rs1129005  | chr15:37676797             | THBS1:miR-559          |
| rs1129005  | chr15:37676797             | THBS1:miR-335          |
| rs11282    | chr15:37676842             | THBS1:miR-384          |
| rs679882   | chr15:38546639             | BAHD1:miR-657          |
| rs34268812 | chr15:39018440             | DLL4:miR-520d*         |
| rs34658531 | chr15:39459733             | NUSAP1:miR-561         |
| rs11376196 | chr15:39459737             | NUSAP1:miR-561         |
| rs1942     | chr15:39561715             | RTF1:miR-223           |
| rs35778776 | chr15:39562024             | RTF1:miR-559           |
| rs1801449  | chr15:40468491             | CAPN3:miR-483          |
| rs28364543 | chr15:40490829             | CAPN3:miR-409-3p       |
| rs34368044 | chr15:41022788             | UBR1:miR-559           |
| rs34368044 | chr15:41022788             | UBR1:miR-573           |
| rs62020698 | chr15:41024706             | UBR1:miR-619           |
| rs12079    | chr15:41486749             | TP53BP1:miR-561        |
| rs12079    | chr15:41486749             | TP53BP1:miR-545        |
| rs11638719 | chr15:41719198             | CATSPER2:miR-769-5p    |
| rs3209488  | chr15:41850875             | PDIA3:miR-553          |
| rs11555369 | chr15:41873361             | SERF2:miR-769-3p       |
| rs3833007  | chr15:42641563             | EIF3S1:miR-140         |
| rs1145087  | chr15:43440752             | GATM:miR-557           |
| rs35410548 | chr15:43440864             | GATM:miR-384           |

**Supplemental Table 4: SNPs in miRNA target sites based on PITA prediction**

| <b>SNP</b> | <b>SNP Position (hg18)</b> | <b>PITA Prediction</b> |
|------------|----------------------------|------------------------|
| rs56259861 | chr15:43440865             | GATM:miR-384           |
| rs55986645 | chr15:43636051             | C15orf21:miR-579       |
| rs34884840 | chr15:45851098             | SEMA6D:miR-138         |
| rs58383159 | chr15:45852767             | SEMA6D:miR-613         |
| rs1045689  | chr15:45852821             | SEMA6D:miR-579         |
| rs1045689  | chr15:45852821             | SEMA6D:miR-769-5p      |
| rs11528    | chr15:45853550             | SEMA6D:miR-126         |
| rs55717426 | chr15:46489715             | FBN1:miR-629           |
| rs16960899 | chr15:46490256             | FBN1:miR-196a          |
| rs16960899 | chr15:46490256             | FBN1:miR-196b          |
| rs1054307  | chr15:47068916             | KIAA0256:miR-570       |
| rs35286319 | chr15:47207216             | COPS2:miR-144          |
| rs35286319 | chr15:47207216             | COPS2:miR-605          |
| rs35686890 | chr15:47564345             | FGF7:miR-613           |
| rs1057655  | chr15:47564934             | FGF7:miR-589           |
| rs1802662  | chr15:48356868             | GABPB2:miR-376a        |
| rs1802662  | chr15:48356868             | GABPB2:miR-376b        |
| rs1802662  | chr15:48356868             | GABPB2:miR-142-5p      |
| rs12923    | chr15:48357328             | GABPB2:miR-154         |
| rs3837683  | chr15:48640535             | TRPM7:miR-320          |
| rs3837683  | chr15:48640535             | TRPM7:miR-548a         |
| rs60298843 | chr15:48640535             | TRPM7:miR-320          |
| rs60298843 | chr15:48640535             | TRPM7:miR-548a         |
| rs3837683  | chr15:48640535             | TRPM7:miR-565          |
| rs60298843 | chr15:48640535             | TRPM7:miR-565          |
| rs7169746  | chr15:49083225             | AP4E1:miR-429          |
| rs3825799  | chr15:49083226             | AP4E1:miR-429          |
| rs56367619 | chr15:50145610             | MAPK6:miR-636          |
| rs61202723 | chr15:50386832             | MYO5A:miR-569          |
| rs61202723 | chr15:50386832             | MYO5A:miR-425-5p       |
| rs36078972 | chr15:50388325             | MYO5A:miR-328          |
| rs62015995 | chr15:50391825             | MYO5A:miR-630          |
| rs35681053 | chr15:50392445             | MYO5A:miR-640          |
| rs11857272 | chr15:50629983             | ARPP-19:miR-508        |
| rs1055747  | chr15:50630353             | ARPP-19:miR-561        |
| rs8026294  | chr15:51596134             | WDR72:miR-617          |
| rs1053864  | chr15:52706703             | UNC13C:miR-30a-5p      |
| rs1053864  | chr15:52706703             | UNC13C:miR-30b         |
| rs1053864  | chr15:52706703             | UNC13C:miR-30c         |
| rs1053864  | chr15:52706703             | UNC13C:miR-30d         |
| rs1053864  | chr15:52706703             | UNC13C:miR-30e-5p      |
| rs28704091 | chr15:52707477             | UNC13C:miR-559         |
| rs28497739 | chr15:52707524             | UNC13C:miR-144         |
| rs16976428 | chr15:53698960             | PRTG:miR-485-3p        |
| rs16976428 | chr15:53698960             | PRTG:miR-323           |
| rs16976428 | chr15:53698960             | PRTG:miR-363           |
| rs1042472  | chr15:53906486             | NEDD4:miR-595          |
| rs1042472  | chr15:53906486             | NEDD4:miR-648          |
| rs16976737 | chr15:54171090             | RFXDC2:miR-154*        |
| rs16976737 | chr15:54171090             | RFXDC2:miR-487a        |
| rs34672023 | chr15:54171917             | RFXDC2:miR-559         |
| rs9972586  | chr15:54171931             | RFXDC2:miR-216         |

**Supplemental Table 4: SNPs in miRNA target sites based on PITA prediction**

| <b>SNP</b> | <b>SNP Position (hg18)</b> | <b>PITA Prediction</b> |
|------------|----------------------------|------------------------|
| rs59479430 | chr15:54171943             | RFXDC2:miR-216         |
| rs12438324 | chr15:55366808             | TCF12:miR-801          |
| rs2431026  | chr15:55367701             | TCF12:miR-569          |
| rs7174233  | chr15:55764662             | Gcom1:miR-224          |
| rs1062707  | chr15:55788273             | GRINL1A:miR-17-3p      |
| rs3985735  | chr15:55795265             | GRINL1A:miR-505        |
| rs35897884 | chr15:56033013             | ALDH1A2:miR-198        |
| rs35897884 | chr15:56033013             | ALDH1A2:miR-520a*      |
| rs35897884 | chr15:56033013             | ALDH1A2:miR-525        |
| rs4646642  | chr15:56034208             | ALDH1A2:miR-539        |
| rs36008859 | chr15:56934673             | FAM63B:miR-203         |
| rs431414   | chr15:56935092             | FAM63B:miR-154         |
| rs3751539  | chr15:57175505             | RNF111:miR-27a         |
| rs3751539  | chr15:57175505             | RNF111:miR-27b         |
| rs6151584  | chr15:57743397             | BNIP2:miR-199a*        |
| rs58293779 | chr15:60920161             | TLN2:miR-374           |
| rs7178040  | chr15:61151151             | TPM1:miR-648           |
| rs7178040  | chr15:61151151             | TPM1:miR-139           |
| rs28406541 | chr15:61346051             | RAB8B:miR-649          |
| rs7181218  | chr15:61346913             | RAB8B:miR-571          |
| rs7181218  | chr15:61346913             | RAB8B:miR-569          |
| rs1131647  | chr15:61688166             | HERC1:miR-577          |
| rs11548866 | chr15:62152245             | FAM96A:miR-22          |
| rs1043082  | chr15:62235110             | SNX22:miR-505          |
| rs1043082  | chr15:62235110             | SNX22:miR-634          |
| rs1804427  | chr15:62235306             | SNX22:miR-491          |
| rs28720193 | chr15:62236013             | SNX22:miR-432*         |
| rs62024252 | chr15:62245458             | CSNK1G1:miR-338        |
| rs34883285 | chr15:62249653             | CSNK1G1:miR-613        |
| rs62024255 | chr15:62250178             | CSNK1G1:miR-143        |
| rs8034064  | chr15:62761196             | ZNF609:miR-199a*       |
| rs28675704 | chr15:62946052             | PLEKHQ1:miR-594        |
| rs62012486 | chr15:63196809             | PDCD7:miR-620          |
| rs62012486 | chr15:63196809             | PDCD7:miR-410          |
| rs1141278  | chr15:63275644             | CILP:miR-26a           |
| rs1141278  | chr15:63275644             | CILP:miR-26b           |
| rs5813350  | chr15:63460967             | NOPE:miR-185           |
| rs5813351  | chr15:63460976             | NOPE:miR-518b          |
| rs5813351  | chr15:63460976             | NOPE:miR-518c          |
| rs5813351  | chr15:63460976             | NOPE:miR-518d          |
| rs33998478 | chr15:63461854             | NOPE:miR-650           |
| rs14303    | chr15:64570315             | MAP2K1:miR-580         |
| rs14538    | chr15:64570803             | MAP2K1:miR-103         |
| rs14538    | chr15:64570803             | MAP2K1:miR-107         |
| rs45615538 | chr15:64861144             | SMAD6:miR-767-5p       |
| rs45615538 | chr15:64861144             | SMAD6:miR-25           |
| rs45615538 | chr15:64861144             | SMAD6:miR-367          |
| rs45615538 | chr15:64861144             | SMAD6:miR-92           |
| rs45615538 | chr15:64861144             | SMAD6:miR-92b          |
| rs1052488  | chr15:65273901             | SMAD3:miR-544          |
| rs2202380  | chr15:67484810             | PAQR5:miR-191          |
| rs34664771 | chr15:67527613             | KIF23:miR-539          |

**Supplemental Table 4: SNPs in miRNA target sites based on PITA prediction**

| <b>SNP</b> | <b>SNP Position (hg18)</b> | <b>PITA Prediction</b> |
|------------|----------------------------|------------------------|
| rs14636    | chr15:70662728             | ARIH1:miR-517*         |
| rs61628540 | chr15:70831616             | ADPGK:miR-1            |
| rs61628540 | chr15:70831616             | ADPGK:miR-206          |
| rs61628540 | chr15:70831616             | ADPGK:miR-455          |
| rs1043586  | chr15:71639506             | NPTN:miR-517b          |
| rs1043589  | chr15:71639527             | NPTN:miR-146a          |
| rs1043589  | chr15:71639527             | NPTN:miR-146b          |
| rs1043555  | chr15:71639661             | NPTN:miR-539           |
| rs3178164  | chr15:72256258             | ISLR:miR-372           |
| rs3178164  | chr15:72256258             | ISLR:miR-93            |
| rs3178164  | chr15:72256258             | ISLR:miR-361           |
| rs59860926 | chr15:72676198             | ARID3B:miR-577         |
| rs59860926 | chr15:72676198             | ARID3B:miR-559         |
| rs56663733 | chr15:72676199             | ARID3B:miR-577         |
| rs56663733 | chr15:72676199             | ARID3B:miR-559         |
| rs3184088  | chr15:72677407             | ARID3B:miR-645         |
| rs1130369  | chr15:72706786             | CLK3:miR-9             |
| rs17851757 | chr15:72709227             | CLK3:miR-621           |
| rs4886624  | chr15:72882206             | CSK:miR-583            |
| rs2071501  | chr15:72882210             | CSK:miR-583            |
| rs2071501  | chr15:72882210             | CSK:miR-216            |
| rs11551123 | chr15:73450494             | SIN3A:miR-101          |
| rs56757384 | chr15:73450800             | SIN3A:miR-31           |
| rs335687   | chr15:73979021             | UBE2Q2:miR-527         |
| rs11854453 | chr15:74421345             | ISL2:miR-802           |
| rs2469225  | chr15:74427713             | ZNF291:miR-335         |
| rs17381898 | chr15:75191697             | SGK269:miR-493-5p      |
| rs2139448  | chr15:76360642             | DNAJA4:miR-518a        |
| rs2139448  | chr15:76360642             | DNAJA4:miR-518e        |
| rs2139448  | chr15:76360642             | DNAJA4:miR-518f        |
| rs16970208 | chr15:76976930             | MORF4L1:miR-432*       |
| rs1062752  | chr15:76977041             | MORF4L1:miR-33         |
| rs1062752  | chr15:76977041             | MORF4L1:miR-33b        |
| rs1062752  | chr15:76977041             | MORF4L1:miR-586        |
| rs3211410  | chr15:76977048             | MORF4L1:miR-33         |
| rs3211410  | chr15:76977048             | MORF4L1:miR-33b        |
| rs3211410  | chr15:76977048             | MORF4L1:miR-586        |
| rs3211410  | chr15:76977048             | MORF4L1:miR-148b       |
| rs3211410  | chr15:76977048             | MORF4L1:miR-152        |
| rs3211410  | chr15:76977048             | MORF4L1:miR-768-3p     |
| rs3825793  | chr15:78834952             | FAM108C1:miR-182       |
| rs1045388  | chr15:82499378             | ADAMTSL3:miR-569       |
| rs61156636 | chr15:84093463             | AKAP13:miR-603         |
| rs28562651 | chr15:86323556             | NTRK3:miR-589          |
| rs1042499  | chr15:88129309             | ANPEP:miR-516-3p       |
| rs1042499  | chr15:88129309             | ANPEP:miR-125a         |
| rs1042499  | chr15:88129309             | ANPEP:miR-125b         |
| rs12148341 | chr15:88424595             | ZNF710:let-7e          |
| rs7024     | chr15:88573835             | SEMA4B:miR-568         |
| rs10307    | chr15:88845288             | IQGAP1:miR-33          |
| rs10307    | chr15:88845288             | IQGAP1:miR-586         |
| rs6228     | chr15:89226499             | FURIN:miR-661          |



**Supplemental Table 4: SNPs in miRNA target sites based on PITA prediction**

| <b>SNP</b> | <b>SNP Position (hg18)</b> | <b>PITA Prediction</b> |
|------------|----------------------------|------------------------|
| rs4702     | chr15:89227564             | FURIN:miR-338          |
| rs2290492  | chr15:90808978             | ST8SIA2:miR-556        |
| rs7167007  | chr15:96318041             | ARRDC4:miR-208         |
| rs1815009  | chr15:97322194             | IGF1R:miR-647          |
| rs2654980  | chr15:97322366             | IGF1R:miR-34a          |
| rs2654980  | chr15:97322366             | IGF1R:miR-34c          |
| rs2654980  | chr15:97322366             | IGF1R:miR-449          |
| rs2654980  | chr15:97322366             | IGF1R:miR-449b         |
| rs2654980  | chr15:97322366             | IGF1R:miR-34b          |
| rs11542591 | chr15:97323740             | IGF1R:miR-653          |
| rs57778807 | chr15:98329417             | ADAMTS17:miR-544       |
| rs57778807 | chr15:98329417             | ADAMTS17:miR-630       |
| rs2727199  | chr15:98331940             | ADAMTS17:miR-9*        |
| rs35133782 | chr15:98331940             | ADAMTS17:miR-9*        |
| rs2581343  | chr15:98331941             | ADAMTS17:miR-9*        |
| rs1802604  | chr15:99274190             | ALDH1A3:miR-656        |
| rs1802604  | chr15:99274190             | ALDH1A3:miR-144        |
| rs7189908  | chr16:179108               | LUC7L:miR-520d*        |
| rs7189908  | chr16:179108               | LUC7L:miR-524*         |
| rs17555255 | chr16:619242               | RAB40C:miR-524*        |
| rs17555255 | chr16:619242               | RAB40C:miR-568         |
| rs34375495 | chr16:672180               | LOC339123:miR-324-5p   |
| rs3204090  | chr16:672466               | LOC339123:miR-580      |
| rs11546345 | chr16:2509811              | ATP6V0C:miR-375        |
| rs11554591 | chr16:2593021              | PDPK1:miR-9*           |
| rs28595195 | chr16:3012092              | TNFRSF12A:miR-372      |
| rs28595195 | chr16:3012092              | TNFRSF12A:miR-93       |
| rs28595195 | chr16:3012092              | TNFRSF12A:miR-105      |
| rs34148810 | chr16:3716630              | CREBBP:miR-542-5p      |
| rs7187345  | chr16:3953930              | ADCY9:miR-7            |
| rs10852642 | chr16:4182029              | SRL:miR-556            |
| rs1042846  | chr16:4247235              | TFAP4:miR-564          |
| rs57083382 | chr16:4680915              | MGRN1:miR-594          |
| rs9936     | chr16:4793342              | N-PAC:miR-559          |
| rs9936     | chr16:4793342              | N-PAC:miR-577          |
| rs8062475  | chr16:7701112              | A2BP1:miR-562          |
| rs12934685 | chr16:7701424              | A2BP1:miR-200b         |
| rs12934685 | chr16:7701424              | A2BP1:miR-200c         |
| rs12934685 | chr16:7701424              | A2BP1:miR-429          |
| rs3803674  | chr16:7701454              | A2BP1:miR-384          |
| rs35663109 | chr16:8894349              | USP7:miR-577           |
| rs11551181 | chr16:8895225              | USP7:miR-142-5p        |
| rs11551181 | chr16:8895225              | USP7:miR-559           |
| rs11575877 | chr16:9763982              | GRIN2A:miR-610         |
| rs9937910  | chr16:9764017              | GRIN2A:miR-25          |
| rs9937910  | chr16:9764017              | GRIN2A:miR-367         |
| rs9937910  | chr16:9764017              | GRIN2A:miR-92          |
| rs9937910  | chr16:9764017              | GRIN2A:miR-92b         |
| rs34927167 | chr16:11255962             | SOCS1:miR-582          |
| rs35560842 | chr16:11678054             | SNN:miR-545            |
| rs36012200 | chr16:11680504             | SNN:miR-1              |
| rs36012200 | chr16:11680504             | SNN:miR-206            |

**Supplemental Table 4: SNPs in miRNA target sites based on PITA prediction**

| <b>SNP</b> | <b>SNP Position (hg18)</b> | <b>PITA Prediction</b> |
|------------|----------------------------|------------------------|
| rs7090     | chr16:11752156             | ZC3H7A:miR-365         |
| rs7090     | chr16:11752156             | ZC3H7A:miR-136         |
| rs970889   | chr16:11874141             | GSPT1:miR-455          |
| rs62622820 | chr16:11874417             | GSPT1:let-7e           |
| rs3803577  | chr16:15596591             | LKAP:miR-579           |
| rs35715530 | chr16:15597464             | LKAP:miR-124a          |
| rs12907    | chr16:15726154             | NDE1:miR-558           |
| rs1472428  | chr16:17103997             | XYLT1:miR-9            |
| rs11456584 | chr16:18727003             | SMG1:miR-203           |
| rs11456584 | chr16:18727003             | SMG1:miR-130a          |
| rs11456584 | chr16:18727003             | SMG1:miR-130b          |
| rs11456584 | chr16:18727003             | SMG1:miR-301           |
| rs11456584 | chr16:18727003             | SMG1:miR-454-3p        |
| rs11456584 | chr16:18727003             | SMG1:miR-155           |
| rs62046279 | chr16:18727769             | SMG1:miR-205           |
| rs2729     | chr16:19776188             | MGC35048:miR-591       |
| rs9924280  | chr16:20778402             | DCUN1D3:miR-548b       |
| rs9924280  | chr16:20778402             | DCUN1D3:miR-548c       |
| rs35251225 | chr16:20778439             | DCUN1D3:miR-516-5p     |
| rs35576202 | chr16:20778504             | DCUN1D3:miR-583        |
| rs16976044 | chr16:22985166             | USP31:miR-19a          |
| rs16976044 | chr16:22985166             | USP31:miR-19b          |
| rs3751846  | chr16:22986828             | USP31:miR-30a-5p       |
| rs3751846  | chr16:22986828             | USP31:miR-30b          |
| rs3751846  | chr16:22986828             | USP31:miR-30c          |
| rs3751846  | chr16:22986828             | USP31:miR-30d          |
| rs3751846  | chr16:22986828             | USP31:miR-30e-5p       |
| rs3380     | chr16:24133766             | PRKCB1:miR-141         |
| rs3380     | chr16:24133766             | PRKCB1:miR-200a        |
| rs3380     | chr16:24133766             | PRKCB1:miR-429         |
| rs3785379  | chr16:24134435             | PRKCB1:miR-605         |
| rs3837785  | chr16:24134462             | PRKCB1:miR-129         |
| rs1043774  | chr16:24281127             | CACNG3:miR-368         |
| rs1043624  | chr16:24742974             | TNRC6A:miR-185         |
| rs1043625  | chr16:24742976             | TNRC6A:miR-185         |
| rs35671423 | chr16:24743462             | TNRC6A:miR-136         |
| rs35671423 | chr16:24743462             | TNRC6A:miR-205         |
| rs58962255 | chr16:28756009             | ATXN2L:miR-380-3p      |
| rs1128259  | chr16:28792872             | SH2B:miR-383           |
| rs1062379  | chr16:29989207             | ALDOA:miR-34a          |
| rs1062379  | chr16:29989207             | ALDOA:miR-34c          |
| rs1062379  | chr16:29989207             | ALDOA:miR-449          |
| rs1062379  | chr16:29989207             | ALDOA:miR-449b         |
| rs1127447  | chr16:30275993             | TBC1D10B:miR-185       |
| rs1127447  | chr16:30275993             | TBC1D10B:miR-1         |
| rs1127447  | chr16:30275993             | TBC1D10B:miR-206       |
| rs3747485  | chr16:30588657             | FBRS:miR-629           |
| rs11538958 | chr16:30588788             | FBRS:miR-484           |
| rs11538958 | chr16:30588788             | FBRS:let-7e            |
| rs11538958 | chr16:30588788             | FBRS:miR-650           |
| rs34494127 | chr16:30588903             | FBRS:miR-493-5p        |
| rs11538957 | chr16:30589317             | FBRS:miR-637           |

**Supplemental Table 4: SNPs in miRNA target sites based on PITA prediction**

| <b>SNP</b> | <b>SNP Position (hg18)</b> | <b>PITA Prediction</b> |
|------------|----------------------------|------------------------|
| rs1047488  | chr16:31050027             | MYST1:miR-184          |
| rs370159   | chr16:45293764             | MLCK:miR-410           |
| rs16952122 | chr16:45673277             | NETO2:miR-539          |
| rs16952122 | chr16:45673277             | NETO2:miR-561          |
| rs41280917 | chr16:46674525             | ABCC12:miR-539         |
| rs34922460 | chr16:48627061             | C16orf69:miR-552       |
| rs62028293 | chr16:48821555             | PAPD5:miR-153          |
| rs62028293 | chr16:48821555             | PAPD5:miR-519a         |
| rs62028293 | chr16:48821555             | PAPD5:miR-519b         |
| rs62028293 | chr16:48821555             | PAPD5:miR-519c         |
| rs1054478  | chr16:49727522             | SALL1:miR-18a          |
| rs1054478  | chr16:49727522             | SALL1:miR-18b          |
| rs1054478  | chr16:49727522             | SALL1:miR-519a         |
| rs1054478  | chr16:49727522             | SALL1:miR-519b         |
| rs1054478  | chr16:49727522             | SALL1:miR-519c         |
| rs12920808 | chr16:49728243             | SALL1:miR-452          |
| rs57079965 | chr16:51029928             | TNRC9:miR-576          |
| rs28670961 | chr16:52082332             | RBL2:miR-657           |
| rs7192937  | chr16:52082967             | FTS:miR-142-3p         |
| rs7192937  | chr16:52082967             | RBL2:miR-141           |
| rs7192937  | chr16:52082967             | RBL2:miR-200a          |
| rs1946155  | chr16:52191796             | KIAA1005:miR-520a*     |
| rs1946155  | chr16:52191796             | KIAA1005:miR-525       |
| rs35669682 | chr16:52192998             | KIAA1005:miR-26a       |
| rs35669682 | chr16:52192998             | KIAA1005:miR-26b       |
| rs1799839  | chr16:54097153             | MMP2:miR-593           |
| rs1799839  | chr16:54097153             | MMP2:miR-624           |
| rs17860021 | chr16:54097255             | MMP2:miR-453           |
| rs35368178 | chr16:56705353             | GTL3:miR-129           |
| rs35368178 | chr16:56705353             | GTL3:miR-33            |
| rs11539297 | chr16:57104663             | NDRG4:miR-561          |
| rs3200465  | chr16:57112176             | CNOT1:miR-519a         |
| rs3200465  | chr16:57112176             | CNOT1:miR-519b         |
| rs3200465  | chr16:57112176             | CNOT1:miR-519c         |
| rs3840045  | chr16:60244865             | CDH8:miR-659           |
| rs7499268  | chr16:64996034             | CDH5:miR-490           |
| rs7499268  | chr16:64996034             | CDH5:miR-548b          |
| rs7499268  | chr16:64996034             | CDH5:miR-548c          |
| rs9927827  | chr16:65691603             | CBFB:miR-155           |
| rs35326373 | chr16:65692389             | CBFB:miR-335           |
| rs11700    | chr16:65790185             | E2F4:miR-517*          |
| rs11700    | chr16:65790185             | E2F4:miR-135a          |
| rs11700    | chr16:65790185             | E2F4:miR-135b          |
| rs11700    | chr16:65790185             | E2F4:miR-522           |
| rs1063258  | chr16:66229706             | CTCF:miR-335           |
| rs1063258  | chr16:66229706             | CTCF:miR-559           |
| rs1063259  | chr16:66229707             | CTCF:miR-335           |
| rs1063259  | chr16:66229707             | CTCF:miR-559           |
| rs58833596 | chr16:66229911             | CTCF:miR-106a          |
| rs58833596 | chr16:66229911             | CTCF:miR-106b          |
| rs58833596 | chr16:66229911             | CTCF:miR-17-5p         |
| rs58833596 | chr16:66229911             | CTCF:miR-20a           |

**Supplemental Table 4: SNPs in miRNA target sites based on PITA prediction**

| <b>SNP</b> | <b>SNP Position (hg18)</b> | <b>PITA Prediction</b> |
|------------|----------------------------|------------------------|
| rs58833596 | chr16:66229911             | CTCF:miR-20b           |
| rs11043    | chr16:66820459             | RBM35B:miR-581         |
| rs7203660  | chr16:66949983             | SMPD3:miR-633          |
| rs36087213 | chr16:66952264             | SMPD3:miR-548b         |
| rs36087213 | chr16:66952264             | SMPD3:miR-504          |
| rs3169307  | chr16:67709509             | CTF8:miR-128a          |
| rs3169307  | chr16:67709509             | CTF8:miR-128b          |
| rs35002387 | chr16:67710742             | CTF8:miR-331           |
| rs16958754 | chr16:67916015             | VPS4A:miR-103          |
| rs16958754 | chr16:67916015             | VPS4A:miR-107          |
| rs16958886 | chr16:68055550             | CYB5B:miR-496          |
| rs55945292 | chr16:68289632             | NFAT5:miR-640          |
| rs36095407 | chr16:68500686             | WWP2:miR-186           |
| rs36095407 | chr16:68500686             | WWP2:miR-185           |
| rs12927272 | chr16:70320539             | AP1G1:miR-499          |
| rs61081595 | chr16:70320855             | AP1G1:miR-548d         |
| rs61081595 | chr16:70320855             | AP1G1:miR-337          |
| rs62053140 | chr16:70320857             | AP1G1:miR-548d         |
| rs62053140 | chr16:70320857             | AP1G1:miR-337          |
| rs11539981 | chr16:70323755             | AP1G1:miR-216          |
| rs1053412  | chr16:71374408             | ATBF1:miR-542-3p       |
| rs3841241  | chr16:71376466             | ATBF1:miR-494          |
| rs34287921 | chr16:73701247             | ZNRF1:miR-515-3p       |
| rs383362   | chr16:77803321             | WWOX:miR-801           |
| rs57234047 | chr16:78188366             | MAF:miR-494            |
| rs57234047 | chr16:78188366             | MAF:miR-641            |
| rs35383470 | chr16:78189673             | MAF:miR-548c           |
| rs1128432  | chr16:80302598             | CMIP:miR-549           |
| rs1064208  | chr16:80739478             | MPHOSPH6:miR-30a-5p    |
| rs1064208  | chr16:80739478             | MPHOSPH6:miR-30b       |
| rs1064208  | chr16:80739478             | MPHOSPH6:miR-30c       |
| rs1064208  | chr16:80739478             | MPHOSPH6:miR-30d       |
| rs1064208  | chr16:80739478             | MPHOSPH6:miR-30e-5p    |
| rs16974598 | chr16:83370524             | USP10:miR-138          |
| rs16974880 | chr16:83500139             | CRISPLD2:miR-145       |
| rs60165147 | chr16:84263739             | KIAA0182:miR-498       |
| rs60165147 | chr16:84263739             | KIAA0182:miR-607       |
| rs11544837 | chr16:84264538             | KIAA0182:miR-495       |
| rs6539998  | chr16:84264567             | KIAA0182:miR-495       |
| rs6539998  | chr16:84264567             | KIAA0182:miR-570       |
| rs6539998  | chr16:84264567             | KIAA0182:miR-589       |
| rs45509493 | chr16:85104646             | FOXF1:miR-577          |
| rs45509493 | chr16:85104646             | FOXF1:miR-559          |
| rs62047998 | chr16:87225689             | NHN1:miR-425-3p        |
| rs1064245  | chr17:591736               | FAM57A:miR-450         |
| rs1064245  | chr17:591736               | FAM57A:miR-302a        |
| rs1064245  | chr17:591736               | FAM57A:miR-302b        |
| rs1064245  | chr17:591736               | FAM57A:miR-302c        |
| rs1064245  | chr17:591736               | FAM57A:miR-302d        |
| rs1064245  | chr17:591736               | FAM57A:miR-373         |
| rs1064245  | chr17:591736               | FAM57A:miR-520a        |
| rs1064245  | chr17:591736               | FAM57A:miR-520b        |

**Supplemental Table 4: SNPs in miRNA target sites based on PITA prediction**

| <b>SNP</b> | <b>SNP Position (hg18)</b> | <b>PITA Prediction</b> |
|------------|----------------------------|------------------------|
| rs1064245  | chr17:591736               | FAM57A:miR-520c        |
| rs1064245  | chr17:591736               | FAM57A:miR-520d        |
| rs1064245  | chr17:591736               | FAM57A:miR-520e        |
| rs1064245  | chr17:591736               | FAM57A:miR-526b*       |
| rs1064245  | chr17:591736               | FAM57A:miR-106a        |
| rs1064245  | chr17:591736               | FAM57A:miR-106b        |
| rs1064245  | chr17:591736               | FAM57A:miR-17-5p       |
| rs1064245  | chr17:591736               | FAM57A:miR-20a         |
| rs1064245  | chr17:591736               | FAM57A:miR-20b         |
| rs4025784  | chr17:855647               | ABR:miR-185            |
| rs35236437 | chr17:855650               | ABR:miR-185            |
| rs35236437 | chr17:855650               | ABR:miR-485-5p         |
| rs55973954 | chr17:855651               | ABR:miR-185            |
| rs55973954 | chr17:855651               | ABR:miR-485-5p         |
| rs1804636  | chr17:1194932              | YWHAE:miR-103          |
| rs1804636  | chr17:1194932              | YWHAE:miR-107          |
| rs191652   | chr17:1195215              | YWHAE:miR-128a         |
| rs191652   | chr17:1195215              | YWHAE:miR-128b         |
| rs191652   | chr17:1195215              | YWHAE:miR-199a*        |
| rs7266     | chr17:1195216              | YWHAE:miR-128a         |
| rs7266     | chr17:1195216              | YWHAE:miR-128b         |
| rs7266     | chr17:1195216              | YWHAE:miR-199a*        |
| rs9814     | chr17:1368097              | PITPNA:miR-577         |
| rs11544976 | chr17:1370162              | PITPNA:miR-493-3p      |
| rs10654009 | chr17:1561562              | MGC14376:miR-656       |
| rs5818826  | chr17:1561566              | MGC14376:miR-656       |
| rs35346331 | chr17:1561567              | MGC14376:miR-656       |
| rs17339340 | chr17:1747757              | RPA1:miR-18a*          |
| rs1804586  | chr17:1892981              | DPH1:miR-302a*         |
| rs35343613 | chr17:2174405              | SRR:miR-588            |
| rs2273983  | chr17:2174738              | SRR:miR-421            |
| rs2273983  | chr17:2174738              | SRR:miR-302b*          |
| rs35049209 | chr17:2234451              | MNT:miR-562            |
| rs35049209 | chr17:2234451              | MNT:miR-646            |
| rs2447096  | chr17:2234641              | MNT:miR-210            |
| rs1050061  | chr17:2532313              | PFAFH1B1:miR-600       |
| rs59721618 | chr17:2532639              | PFAFH1B1:miR-633       |
| rs12452806 | chr17:2535296              | PFAFH1B1:miR-646       |
| rs12452806 | chr17:2535296              | PFAFH1B1:miR-562       |
| rs58458769 | chr17:2535473              | PFAFH1B1:miR-132       |
| rs58458769 | chr17:2535473              | PFAFH1B1:miR-212       |
| rs35374496 | chr17:3712193              | CAMKK1:miR-654         |
| rs35121541 | chr17:4121912              | UBE2G1:miR-583         |
| rs2233658  | chr17:4789820              | PFN1:miR-140           |
| rs3026151  | chr17:5318396              | DERL2:miR-767-5p       |
| rs56388006 | chr17:7034005              | DLG4:miR-103           |
| rs56388006 | chr17:7034005              | DLG4:miR-107           |
| rs56388006 | chr17:7034005              | DLG4:miR-30a-3p        |
| rs56388006 | chr17:7034005              | DLG4:miR-30e-3p        |
| rs56388006 | chr17:7034005              | DLG4:miR-145           |
| rs7502202  | chr17:7034106              | DLG4:miR-515-5p        |
| rs7502202  | chr17:7034106              | DLG4:miR-519e*         |

**Supplemental Table 4: SNPs in miRNA target sites based on PITA prediction**

| <b>SNP</b> | <b>SNP Position (hg18)</b> | <b>PITA Prediction</b> |
|------------|----------------------------|------------------------|
| rs7502202  | chr17:7034106              | DLG4:miR-186           |
| rs5819149  | chr17:7034136              | DLG4:miR-221           |
| rs3177209  | chr17:7084472              | GABARAP:miR-140        |
| rs1802216  | chr17:7084618              | GABARAP:miR-589        |
| rs17849664 | chr17:7103684              | C17orf81:miR-154       |
| rs35778824 | chr17:7156369              | EIF5A:miR-642          |
| rs3222136  | chr17:7198573              | KCTD11:miR-329         |
| rs3214396  | chr17:7263553              | NLGN2:miR-510          |
| rs3214396  | chr17:7263553              | NLGN2:miR-637          |
| rs34779616 | chr17:7304175              | ZBTB4:miR-136          |
| rs1133249  | chr17:7415883              | SENP3:miR-568          |
| rs58537439 | chr17:7415883              | SENP3:miR-568          |
| rs58805209 | chr17:7415885              | SENP3:miR-568          |
| rs11553167 | chr17:7698538              | JMJD3:miR-571          |
| rs34543626 | chr17:7755892              | CHD3:miR-768-5p        |
| rs1048750  | chr17:7984600              | PER1:miR-580           |
| rs1048750  | chr17:7984600              | PER1:miR-614           |
| rs2735608  | chr17:7984604              | PER1:miR-580           |
| rs2735608  | chr17:7984604              | PER1:miR-614           |
| rs2735608  | chr17:7984604              | PER1:miR-661           |
| rs1051780  | chr17:8003781              | VAMP2:miR-34b          |
| rs12940891 | chr17:8017607              | TMEM107:miR-552        |
| rs17852347 | chr17:8311051              | NDEL1:miR-650          |
| rs8067822  | chr17:8311072              | NDEL1:miR-485-5p       |
| rs1042626  | chr17:8318829              | MYH10:miR-660          |
| rs961      | chr17:8319657              | MYH10:miR-568          |
| rs9889875  | chr17:9087984              | NTN1:miR-323           |
| rs9889875  | chr17:9087984              | NTN1:miR-662           |
| rs1804193  | chr17:15074731             | PMP22:miR-559          |
| rs8076239  | chr17:15432968             | CDRT1:miR-513          |
| rs1077790  | chr17:17338614             | RASD1:miR-18a          |
| rs1077790  | chr17:17338614             | RASD1:miR-18b          |
| rs9914083  | chr17:17687821             | TOM1L2:miR-19a         |
| rs9914083  | chr17:17687821             | TOM1L2:miR-19b         |
| rs10648639 | chr17:17910490             | C17orf39:miR-521       |
| rs1133710  | chr17:17912107             | C17orf39:miR-559       |
| rs11548435 | chr17:18775163             | PRPSAP2:miR-524*       |
| rs11548435 | chr17:18775163             | PRPSAP2:miR-520d*      |
| rs59574455 | chr17:19619243             | ULK2:miR-299-3p        |
| rs59574455 | chr17:19619243             | ULK2:miR-28            |
| rs59574455 | chr17:19619243             | ULK2:miR-618           |
| rs34676938 | chr17:23546076             | NLK:miR-659            |
| rs34739978 | chr17:23546104             | NLK:miR-494            |
| rs34739978 | chr17:23546104             | NLK:miR-641            |
| rs35187605 | chr17:23546136             | NLK:miR-132            |
| rs35187605 | chr17:23546136             | NLK:miR-212            |
| rs3179941  | chr17:23965606             | KIAA0100:miR-511       |
| rs3208128  | chr17:24065617             | RAB34:miR-637          |
| rs2288594  | chr17:24107285             | C17orf63:miR-122a      |
| rs1060351  | chr17:24230511             | FLOT2:miR-361          |
| rs1060247  | chr17:24231579             | FLOT2:miR-103          |
| rs1060247  | chr17:24231579             | FLOT2:miR-107          |

**Supplemental Table 4: SNPs in miRNA target sites based on PITA prediction**

| <b>SNP</b> | <b>SNP Position (hg18)</b> | <b>PITA Prediction</b> |
|------------|----------------------------|------------------------|
| rs4795478  | chr17:24306106             | SEZ6:miR-577           |
| rs1049878  | chr17:24424746             | MYO18A:miR-185         |
| rs1049877  | chr17:24424748             | MYO18A:miR-185         |
| rs8614     | chr17:24612932             | NUFIP2:miR-365         |
| rs35981445 | chr17:24613871             | NUFIP2:miR-382         |
| rs3211044  | chr17:24925184             | GIT1:miR-183           |
| rs1046243  | chr17:24977168             | SSH2:miR-553           |
| rs56295612 | chr17:24977271             | SSH2:miR-105           |
| rs56295612 | chr17:24977271             | SSH2:miR-519e          |
| rs56280221 | chr17:27721526             | ZNF207:miR-568         |
| rs59705321 | chr17:28364848             | ACCN1:miR-657          |
| rs28932    | chr17:28364860             | ACCN1:miR-635          |
| rs11543122 | chr17:30314127             | CCDC16:miR-191         |
| rs14617    | chr17:31077509             | AP2B1:miR-381          |
| rs10962    | chr17:33120564             | HNF1B:miR-382          |
| rs11545641 | chr17:33120564             | HNF1B:miR-382          |
| rs15083    | chr17:34139350             | MLLT6:miR-502          |
| rs35027897 | chr17:34814986             | MED1:miR-149           |
| rs34115897 | chr17:35014060             | NEUROD2:miR-210        |
| rs449430   | chr17:35015032             | NEUROD2:miR-331        |
| rs408262   | chr17:35015033             | NEUROD2:miR-331        |
| rs45540732 | chr17:35076283             | TCAP:miR-637           |
| rs1044675  | chr17:35330858             | ORMDL3:miR-429         |
| rs11543298 | chr17:35688284             | WIRE:miR-650           |
| rs1057988  | chr17:37100680             | EIF1:miR-649           |
| rs11550320 | chr17:37100703             | EIF1:miR-656           |
| rs5001709  | chr17:37134071             | HAP1:miR-339           |
| rs12451233 | chr17:37212653             | SC65:miR-522           |
| rs1802740  | chr17:37531149             | RAB5C:miR-18a          |
| rs1802740  | chr17:37531149             | RAB5C:miR-18b          |
| rs15456    | chr17:37604923             | STAT5B:miR-539         |
| rs34694406 | chr17:37605734             | STAT5B:miR-330         |
| rs1803126  | chr17:37721135             | STAT3:miR-137          |
| rs1051166  | chr17:37985114             | LOC162427:miR-27a      |
| rs1051166  | chr17:37985114             | LOC162427:miR-27b      |
| rs61754308 | chr17:38184656             | VPS25:miR-671          |
| rs1056730  | chr17:38248603             | PSME3:miR-516-5p       |
| rs11539629 | chr17:38421179             | VAT1:miR-422a          |
| rs11539629 | chr17:38421179             | VAT1:miR-600           |
| rs11539629 | chr17:38421179             | VAT1:miR-376a          |
| rs11539629 | chr17:38421179             | VAT1:miR-376b          |
| rs11539629 | chr17:38421179             | VAT1:miR-513           |
| rs56108540 | chr17:38450993             | BRCA1:miR-539          |
| rs1803040  | chr17:38833708             | ARL4D:miR-96           |
| rs11556733 | chr17:39073421             | MEOX1:miR-579          |
| rs11556733 | chr17:39073421             | MEOX1:miR-182          |
| rs36087185 | chr17:39441544             | NAGS:miR-135a          |
| rs36087185 | chr17:39441544             | NAGS:miR-135b          |
| rs35468252 | chr17:39469019             | LSM12:miR-642          |
| rs60649099 | chr17:40233373             | GJA7:miR-210           |
| rs11539537 | chr17:41463535             | KIAA1267:miR-605       |
| rs9908452  | chr17:42196955             | WNT3:miR-198           |

**Supplemental Table 4: SNPs in miRNA target sites based on PITA prediction**

| <b>SNP</b> | <b>SNP Position (hg18)</b> | <b>PITA Prediction</b> |
|------------|----------------------------|------------------------|
| rs41482350 | chr17:42743754             | ITGB3:miR-453          |
| rs1801416  | chr17:43054778             | NPEPPS:miR-586         |
| rs8065920  | chr17:43115112             | KPNB1:miR-96           |
| rs8070379  | chr17:43115348             | KPNB1:miR-580          |
| rs59388318 | chr17:43115355             | KPNB1:miR-432          |
| rs1136638  | chr17:43115445             | KPNB1:miR-581          |
| rs12938318 | chr17:43115653             | KPNB1:miR-544          |
| rs1140490  | chr17:43502447             | CBX1:miR-208           |
| rs1140490  | chr17:43502447             | CBX1:miR-577           |
| rs1140490  | chr17:43502447             | CBX1:miR-548a          |
| rs1063487  | chr17:43502490             | CBX1:miR-561           |
| rs1042822  | chr17:43975094             | HOXB2:miR-186          |
| rs41306359 | chr17:43975132             | HOXB2:miR-583          |
| rs35764080 | chr17:43981511             | HOXB3:miR-511          |
| rs3087996  | chr17:44024362             | HOXB5:miR-633          |
| rs8844     | chr17:44053709             | HOXB9:miR-181a*        |
| rs45453994 | chr17:44054428             | HOXB9:miR-765          |
| rs2280354  | chr17:44158832             | HOXB13:miR-517*        |
| rs11557620 | chr17:44361384             | UBE2Z:miR-583          |
| rs55849957 | chr17:44655990             | PHOSPHO1:miR-197       |
| rs59034311 | chr17:45031683             | SPOP:miR-186           |
| rs11334194 | chr17:45032316             | SPOP:miR-548c          |
| rs3803876  | chr17:45422438             | DLX3:miR-485-5p        |
| rs3744540  | chr17:45423820             | DLX3:miR-184           |
| rs12944834 | chr17:45616554             | COL1A1:miR-516-3p      |
| rs1802390  | chr17:46184962             | CROP:miR-520a*         |
| rs1802390  | chr17:46184962             | CROP:miR-525           |
| rs3182457  | chr17:46185001             | CROP:miR-542-3p        |
| rs56106159 | chr17:46295266             | TOB1:miR-186           |
| rs8125     | chr17:46398347             | SPAG9:miR-411          |
| rs13293    | chr17:47063538             | CA10:miR-524*          |
| rs13293    | chr17:47063538             | CA10:miR-527           |
| rs11871885 | chr17:47063620             | CA10:miR-499           |
| rs35218139 | chr17:50754775             | HLF:miR-302a*          |
| rs59212690 | chr17:50755318             | HLF:miR-203            |
| rs34087945 | chr17:50755920             | HLF:miR-769-5p         |
| rs34447290 | chr17:50825120             | MMD:miR-653            |
| rs34447290 | chr17:50825120             | MMD:miR-570            |
| rs34447290 | chr17:50825120             | MMD:miR-214            |
| rs1442829  | chr17:52027362             | NOG:miR-608            |
| rs1236187  | chr17:52027392             | NOG:miR-561            |
| rs2332862  | chr17:52371291             | COIL:let-7e            |
| rs12450649 | chr17:53111988             | MSI2:miR-601           |
| rs11538393 | chr17:53112128             | MSI2:miR-589           |
| rs4793924  | chr17:53405033             | ZNF161:miR-122a        |
| rs2333076  | chr17:53406273             | ZNF161:miR-587         |
| rs2233912  | chr17:53437722             | SFRS1:miR-7            |
| rs2233912  | chr17:53437722             | SFRS1:miR-146a         |
| rs2233912  | chr17:53437722             | SFRS1:miR-146b         |
| rs3087762  | chr17:53923679             | MTMR4:miR-455          |
| rs34197394 | chr17:53953172             | SEPT4:miR-491          |
| rs17741424 | chr17:53953990             | SEPT4:miR-106a         |



**Supplemental Table 4: SNPs in miRNA target sites based on PITA prediction**

| <b>SNP</b> | <b>SNP Position (hg18)</b> | <b>PITA Prediction</b> |
|------------|----------------------------|------------------------|
| rs17741424 | chr17:53953990             | SEPT4:miR-106b         |
| rs17741424 | chr17:53953990             | SEPT4:miR-17-5p        |
| rs17741424 | chr17:53953990             | SEPT4:miR-20a          |
| rs17741424 | chr17:53953990             | SEPT4:miR-20b          |
| rs7502088  | chr17:54415865             | PPM1E:miR-197          |
| rs58549129 | chr17:54829449             | YPEL2:miR-432*         |
| rs1804076  | chr17:55126445             | CLTC:miR-199a          |
| rs1804076  | chr17:55126445             | CLTC:miR-199b          |
| rs11542762 | chr17:55126456             | CLTC:miR-643           |
| rs11542762 | chr17:55126456             | CLTC:miR-431           |
| rs1051424  | chr17:55379106             | RPS6KB1:miR-507        |
| rs1051424  | chr17:55379106             | RPS6KB1:miR-129        |
| rs11549046 | chr17:55379504             | RPS6KB1:miR-609        |
| rs11555598 | chr17:55381570             | RPS6KB1:miR-518a       |
| rs11555598 | chr17:55381570             | RPS6KB1:miR-518e       |
| rs11555598 | chr17:55381570             | RPS6KB1:miR-518f       |
| rs11555598 | chr17:55381570             | RPS6KB1:miR-518b       |
| rs11555598 | chr17:55381570             | RPS6KB1:miR-518c       |
| rs11555598 | chr17:55381570             | RPS6KB1:miR-518d       |
| rs34061743 | chr17:55381788             | RPS6KB1:miR-548c       |
| rs34061743 | chr17:55381788             | RPS6KB1:miR-384        |
| rs8067625  | chr17:55611023             | USP32:miR-149          |
| rs9912117  | chr17:55875610             | APPBP2:miR-590         |
| rs61093408 | chr17:55875809             | APPBP2:miR-640         |
| rs62082109 | chr17:55879393             | APPBP2:miR-522         |
| rs729781   | chr17:56841581             | TBX2:miR-581           |
| rs729781   | chr17:56841581             | TBX2:miR-129           |
| rs729781   | chr17:56841581             | TBX2:miR-578           |
| rs59569849 | chr17:56916418             | TBX4:miR-542-3p        |
| rs35206655 | chr17:57297754             | INTS2:miR-640          |
| rs35206655 | chr17:57297754             | INTS2:miR-122a         |
| rs35753433 | chr17:57298106             | INTS2:miR-136          |
| rs35623549 | chr17:57377634             | THRAP1:miR-522         |
| rs35623549 | chr17:57377634             | THRAP1:miR-140         |
| rs1044520  | chr17:57378349             | THRAP1:miR-134         |
| rs1044519  | chr17:57378383             | THRAP1:miR-374         |
| rs9562     | chr17:58044189             | TLK2:miR-515-3p        |
| rs4058577  | chr17:58044351             | TLK2:miR-765           |
| rs4058577  | chr17:58044351             | TLK2:miR-184           |
| rs11268289 | chr17:58856192             | TANC2:miR-522          |
| rs8072447  | chr17:58856670             | TANC2:miR-489          |
| rs63638460 | chr17:58858504             | TANC2:miR-586          |
| rs1046232  | chr17:59126994             | LIMD2:miR-382          |
| rs1046232  | chr17:59126994             | MAP3K3:miR-424         |
| rs1046232  | chr17:59126994             | MAP3K3:miR-802         |
| rs35239390 | chr17:59263178             | SMARCD2:miR-577        |
| rs11558316 | chr17:59263450             | SMARCD2:miR-185        |
| rs17854931 | chr17:59326154             | CSH1:miR-767-5p        |
| rs1050485  | chr17:59926395             | DDX5:miR-33b           |
| rs9906078  | chr17:59971970             | SMURF2:miR-524*        |
| rs55927114 | chr17:60437638             | GNA13:miR-335          |
| rs57572316 | chr17:62504312             | HELZ:miR-320           |

**Supplemental Table 4: SNPs in miRNA target sites based on PITA prediction**

| <b>SNP</b> | <b>SNP Position (hg18)</b> | <b>PITA Prediction</b> |
|------------|----------------------------|------------------------|
| rs3205586  | chr17:63409662             | BPTF:miR-186           |
| rs1132844  | chr17:63409664             | BPTF:miR-524*          |
| rs11540571 | chr17:64038336             | PRKAR1A:miR-580        |
| rs17399600 | chr17:64038395             | PRKAR1A:miR-587        |
| rs57140103 | chr17:65684605             | KCNJ2:miR-193a         |
| rs11555394 | chr17:67633429             | SOX9:miR-633           |
| rs11555393 | chr17:67633432             | SOX9:miR-633           |
| rs35490076 | chr17:67633837             | SOX9:miR-577           |
| rs11555392 | chr17:67634027             | SOX9:miR-495           |
| rs34511924 | chr17:70643677             | HN1:miR-148b           |
| rs34511924 | chr17:70643677             | HN1:miR-152            |
| rs3178287  | chr17:70643683             | HN1:miR-106a           |
| rs3178287  | chr17:70643683             | HN1:miR-106b           |
| rs3178287  | chr17:70643683             | HN1:miR-17-5p          |
| rs3178287  | chr17:70643683             | HN1:miR-20a            |
| rs3178287  | chr17:70643683             | HN1:miR-20b            |
| rs3178287  | chr17:70643683             | HN1:miR-302a           |
| rs3178287  | chr17:70643683             | HN1:miR-302b           |
| rs3178287  | chr17:70643683             | HN1:miR-302c           |
| rs3178287  | chr17:70643683             | HN1:miR-302d           |
| rs3178287  | chr17:70643683             | HN1:miR-373            |
| rs3178287  | chr17:70643683             | HN1:miR-520a           |
| rs3178287  | chr17:70643683             | HN1:miR-520b           |
| rs3178287  | chr17:70643683             | HN1:miR-520c           |
| rs3178287  | chr17:70643683             | HN1:miR-520d           |
| rs3178287  | chr17:70643683             | HN1:miR-520e           |
| rs3178287  | chr17:70643683             | HN1:miR-526b*          |
| rs3178287  | chr17:70643683             | HN1:miR-520f           |
| rs3205678  | chr17:70675673             | SUMO2:miR-553          |
| rs3073415  | chr17:71285962             | H3F3B:miR-10a          |
| rs3073415  | chr17:71285962             | H3F3B:miR-10b          |
| rs2410861  | chr17:71286060             | H3F3B:miR-544          |
| rs2410863  | chr17:71286099             | H3F3B:miR-323          |
| rs3073438  | chr17:71286183             | H3F3B:miR-656          |
| rs35916120 | chr17:71286200             | H3F3B:miR-600          |
| rs58629675 | chr17:71333191             | ZC3H5:miR-612          |
| rs2305912  | chr17:71333225             | ZC3H5:miR-589          |
| rs13588    | chr17:72242181             | SFRS2:miR-33b          |
| rs5822151  | chr17:72458004             | MGAT5B:miR-185         |
| rs55928940 | chr17:74596047             | FLJ21865:miR-544       |
| rs59650175 | chr17:75421687             | CBX4:miR-129           |
| rs59650175 | chr17:75421687             | CBX4:miR-557           |
| rs1062935  | chr17:76554452             | KIAA1303:miR-495       |
| rs8071392  | chr17:76705698             | BAIAP2:miR-577         |
| rs8071392  | chr17:76705698             | BAIAP2:miR-208         |
| rs63611560 | chr17:77047805             | BAHCC1:miR-548c        |
| rs1140892  | chr17:77091951             | ACTG1:miR-10a          |
| rs1140892  | chr17:77091951             | ACTG1:miR-10b          |
| rs56201915 | chr17:77092121             | ACTG1:miR-381          |
| rs11549163 | chr17:77092126             | ACTG1:miR-381          |
| rs1804578  | chr17:77795564             | CSNK1D:miR-31          |
| rs55831128 | chr17:78153492             | FOXK2:miR-495          |

**Supplemental Table 4: SNPs in miRNA target sites based on PITA prediction**

| <b>SNP</b> | <b>SNP Position (hg18)</b> | <b>PITA Prediction</b> |
|------------|----------------------------|------------------------|
| rs11558343 | chr17:78153493             | FOXK2:miR-495          |
| rs35919262 | chr17:78208489             | RAB40B:miR-621         |
| rs10660    | chr18:309446               | COLEC12:miR-671        |
| rs62090090 | chr18:639878               | C18orf56:miR-511       |
| rs1058150  | chr18:639879               | C18orf56:miR-511       |
| rs1058149  | chr18:639881               | C18orf56:miR-511       |
| rs17881528 | chr18:2907151              | LPIN2:miR-590          |
| rs1164     | chr18:2907152              | LPIN2:miR-590          |
| rs14916    | chr18:2907276              | LPIN2:miR-516-5p       |
| rs1057096  | chr18:5280443              | ZFP161:miR-801         |
| rs2726349  | chr18:8629123              | RAB12:miR-383          |
| rs11665124 | chr18:8821615              | KIAA0802:let-7a        |
| rs11665124 | chr18:8821615              | KIAA0802:let-7b        |
| rs11665124 | chr18:8821615              | KIAA0802:let-7c        |
| rs11665124 | chr18:8821615              | KIAA0802:let-7d        |
| rs11665124 | chr18:8821615              | KIAA0802:let-7f        |
| rs11665124 | chr18:8821615              | KIAA0802:let-7g        |
| rs11665124 | chr18:8821615              | KIAA0802:let-7i        |
| rs11665124 | chr18:8821615              | KIAA0802:miR-98        |
| rs11665124 | chr18:8821615              | KIAA0802:miR-589       |
| rs60958789 | chr18:9271555              | ANKRD12:miR-592        |
| rs1046483  | chr18:9271567              | ANKRD12:miR-539        |
| rs3025554  | chr18:9944459              | VAPA:miR-368           |
| rs3025554  | chr18:9944459              | VAPA:miR-376a          |
| rs3025554  | chr18:9944459              | VAPA:miR-376b          |
| rs3025552  | chr18:9944725              | VAPA:miR-513           |
| rs3025537  | chr18:9946752              | VAPA:miR-559           |
| rs14376    | chr18:12436799             | SPIRE1:miR-577         |
| rs36120777 | chr18:12775582             | PTPN2:miR-544          |
| rs4797703  | chr18:12783717             | PTPN2:miR-542-3p       |
| rs11548616 | chr18:12975371             | SEH1L:miR-138          |
| rs3842394  | chr18:13640245             | C18orf1:miR-424        |
| rs35909670 | chr18:13640246             | C18orf1:miR-424        |
| rs1801481  | chr18:13642609             | C18orf1:miR-601        |
| rs16940945 | chr18:13655896             | C18orf19:miR-148b      |
| rs16940945 | chr18:13655896             | C18orf19:miR-152       |
| rs14462    | chr18:16784002             | ROCK1:miR-323          |
| rs55795401 | chr18:21850275             | SS18:miR-142-5p        |
| rs55795401 | chr18:21850275             | SS18:miR-520g          |
| rs55795401 | chr18:21850275             | SS18:miR-520h          |
| rs55652041 | chr18:21851649             | SS18:miR-373*          |
| rs55652041 | chr18:21851649             | SS18:miR-616           |
| rs607404   | chr18:21852158             | SS18:miR-520d*         |
| rs1129711  | chr18:22224907             | TAF4B:miR-589          |
| rs1129713  | chr18:22225438             | TAF4B:miR-653          |
| rs8085080  | chr18:22289253             | KCTD1:miR-609          |
| rs61327137 | chr18:22687516             | AQP4:miR-579           |
| rs11557239 | chr18:22687531             | AQP4:miR-145           |
| rs59062970 | chr18:22750094             | CHST9:miR-548c         |
| rs17467899 | chr18:23785225             | CDH2:miR-186           |
| rs17467906 | chr18:23785227             | CDH2:miR-186           |
| rs11564422 | chr18:23786078             | CDH2:miR-382           |

**Supplemental Table 4: SNPs in miRNA target sites based on PITA prediction**

| <b>SNP</b> | <b>SNP Position (hg18)</b> | <b>PITA Prediction</b> |
|------------|----------------------------|------------------------|
| rs985861   | chr18:26964617             | DSC1:miR-302a*         |
| rs9966608  | chr18:27458573             | B4GALT6:miR-587        |
| rs36074374 | chr18:27963444             | RNF138:miR-539         |
| rs676608   | chr18:28101494             | FAM59A:miR-145         |
| rs682224   | chr18:28101501             | FAM59A:miR-9           |
| rs35966049 | chr18:29581065             | ASXL3:miR-154*         |
| rs35966049 | chr18:29581065             | ASXL3:miR-487a         |
| rs1045954  | chr18:29685527             | NOL4:miR-9*            |
| rs1045954  | chr18:29685527             | NOL4:miR-610           |
| rs61439219 | chr18:29686095             | NOL4:let-7a            |
| rs61439219 | chr18:29686095             | NOL4:let-7b            |
| rs61439219 | chr18:29686095             | NOL4:let-7c            |
| rs61439219 | chr18:29686095             | NOL4:let-7d            |
| rs61439219 | chr18:29686095             | NOL4:let-7f            |
| rs61439219 | chr18:29686095             | NOL4:let-7g            |
| rs61439219 | chr18:29686095             | NOL4:let-7i            |
| rs61439219 | chr18:29686095             | NOL4:miR-98            |
| rs9950418  | chr18:30722110             | DTNA:miR-527           |
| rs674338   | chr18:30725206             | DTNA:miR-548c          |
| rs1131709  | chr18:31141912             | ZNF271:miR-140         |
| rs1804714  | chr18:31170343             | ZNF24:miR-581          |
| rs2974910  | chr18:31170367             | ZNF24:miR-302b*        |
| rs2974910  | chr18:31170367             | ZNF24:miR-505          |
| rs11659769 | chr18:31302399             | C18orf37:miR-625       |
| rs14735    | chr18:31942579             | SLC39A6:miR-568        |
| rs17721715 | chr18:39101906             | SYT4:miR-154*          |
| rs17721715 | chr18:39101906             | SYT4:miR-487a          |
| rs17721715 | chr18:39101906             | SYT4:miR-487b          |
| rs1056570  | chr18:40898133             | SETBP1:miR-548d        |
| rs1056570  | chr18:40898133             | SETBP1:miR-577         |
| rs1056571  | chr18:40898137             | SETBP1:miR-577         |
| rs2298817  | chr18:43621709             | SMAD2:miR-656          |
| rs10553700 | chr18:44643024             | KIAA0427:miR-383       |
| rs34553035 | chr18:44643032             | KIAA0427:miR-577       |
| rs16950113 | chr18:44700587             | SMAD7:miR-375          |
| rs16950113 | chr18:44700587             | SMAD7:miR-579          |
| rs57818618 | chr18:45604546             | MYO5B:miR-621          |
| rs1049875  | chr18:46858926             | SMAD4:miR-589          |
| rs28575857 | chr18:46955829             | RKHD2:miR-559          |
| rs28575857 | chr18:46955829             | RKHD2:miR-577          |
| rs56093302 | chr18:46956089             | RKHD2:miR-635          |
| rs7241067  | chr18:49935410             | MBD2:miR-25            |
| rs7241067  | chr18:49935410             | MBD2:miR-367           |
| rs7241067  | chr18:49935410             | MBD2:miR-92            |
| rs7241067  | chr18:49935410             | MBD2:miR-92b           |
| rs35250997 | chr18:50075050             | POLL:miR-522           |
| rs35309239 | chr18:51041911             | TCF4:miR-511           |
| rs11429    | chr18:51042527             | TCF4:miR-32            |
| rs9951787  | chr18:51043304             | TCF4:miR-221           |
| rs59885579 | chr18:51045490             | TCF4:miR-548c          |
| rs2510126  | chr18:51045896             | TCF4:miR-600           |
| rs1801947  | chr18:52421086             | TXNL1:miR-582          |

**Supplemental Table 4: SNPs in miRNA target sites based on PITA prediction**

| <b>SNP</b> | <b>SNP Position (hg18)</b> | <b>PITA Prediction</b> |
|------------|----------------------------|------------------------|
| rs3981373  | chr18:53179985             | ST8SIA3:miR-583        |
| rs5825222  | chr18:53295027             | ONECUT2:miR-511        |
| rs12963672 | chr18:53295932             | ONECUT2:miR-372        |
| rs12963672 | chr18:53295932             | ONECUT2:miR-93         |
| rs12963672 | chr18:53295932             | ONECUT2:miR-106a       |
| rs12963672 | chr18:53295932             | ONECUT2:miR-106b       |
| rs12963672 | chr18:53295932             | ONECUT2:miR-17-5p      |
| rs12963672 | chr18:53295932             | ONECUT2:miR-20a        |
| rs12963672 | chr18:53295932             | ONECUT2:miR-20b        |
| rs58495971 | chr18:53296493             | ONECUT2:miR-758        |
| rs648377   | chr18:53296573             | ONECUT2:miR-508        |
| rs3745065  | chr18:53304810             | ONECUT2:miR-553        |
| rs1129621  | chr18:53464781             | ATP8B1:miR-382         |
| rs11353228 | chr18:54214926             | NEDD4L:miR-106a        |
| rs11353228 | chr18:54214926             | NEDD4L:miR-106b        |
| rs11353228 | chr18:54214926             | NEDD4L:miR-17-5p       |
| rs11353228 | chr18:54214926             | NEDD4L:miR-20a         |
| rs11353228 | chr18:54214926             | NEDD4L:miR-20b         |
| rs1052814  | chr18:54803939             | ZNF532:miR-527         |
| rs1052814  | chr18:54803939             | ZNF532:miR-520g        |
| rs1052814  | chr18:54803939             | ZNF532:miR-520h        |
| rs1052816  | chr18:54803945             | ZNF532:miR-520g        |
| rs1052816  | chr18:54803945             | ZNF532:miR-520h        |
| rs1045941  | chr18:58123852             | KIAA1468:miR-335       |
| rs3833190  | chr18:58395741             | ZCCHC2:miR-141         |
| rs3833190  | chr18:58395741             | ZCCHC2:miR-200a        |
| rs3833190  | chr18:58395741             | ZCCHC2:miR-429         |
| rs10658978 | chr18:58798068             | PHLPP:miR-589          |
| rs10658978 | chr18:58798068             | PHLPP:miR-589          |
| rs5825501  | chr18:58798083             | PHLPP:miR-589          |
| rs5825501  | chr18:58798083             | PHLPP:miR-589          |
| rs34558028 | chr18:58798084             | PHLPP:miR-589          |
| rs34558028 | chr18:58798084             | PHLPP:miR-589          |
| rs3087164  | chr18:58798093             | PHLPP:miR-577          |
| rs58389009 | chr18:58798093             | PHLPP:miR-577          |
| rs34964253 | chr18:59721796             | SERPINB2:miR-802       |
| rs56128444 | chr18:63329100             | C18orf4:miR-603        |
| rs35365006 | chr18:65660358             | DOK6:miR-101           |
| rs41320044 | chr18:66145069             | SOCS6:miR-190          |
| rs1047668  | chr18:66145070             | SOCS6:miR-190          |
| rs7359801  | chr18:66148231             | SOCS6:miR-329          |
| rs17056648 | chr18:71039765             | ZADH2:miR-801          |
| rs632157   | chr18:71040536             | ZADH2:miR-644          |
| rs34141185 | chr18:71250927             | LOC284274:miR-627      |
| rs34141185 | chr18:71250927             | LOC284274:miR-502      |
| rs35079808 | chr18:72201678             | ZNF516:miR-451         |
| rs35079808 | chr18:72201678             | ZNF516:miR-26a         |
| rs35079808 | chr18:72201678             | ZNF516:miR-26b         |
| rs36173648 | chr18:72201759             | ZNF516:miR-633         |
| rs36173648 | chr18:72201759             | ZNF516:miR-633         |
| rs36173648 | chr18:72201759             | ZNF516:miR-633         |
| rs60337965 | chr18:72201765             | ZNF516:miR-633         |

**Supplemental Table 4: SNPs in miRNA target sites based on PITA prediction**

| <b>SNP</b> | <b>SNP Position (hg18)</b> | <b>PITA Prediction</b> |
|------------|----------------------------|------------------------|
| rs60337965 | chr18:72201765             | ZNF516:miR-380-3p      |
| rs60337965 | chr18:72201765             | ZNF516:miR-633         |
| rs34596157 | chr18:72201768             | ZNF516:miR-380-3p      |
| rs34596157 | chr18:72201768             | ZNF516:miR-633         |
| rs9199     | chr18:72821324             | MBP:miR-196a           |
| rs9199     | chr18:72821324             | MBP:miR-196b           |
| rs7964     | chr18:72855106             | MBP:miR-455            |
| rs34639588 | chr18:74858877             | SALL3:miR-154*         |
| rs34639588 | chr18:74858877             | SALL3:miR-487a         |
| rs10404848 | chr19:763013               | PTBP1:miR-507          |
| rs11549884 | chr19:763026               | PTBP1:miR-186          |
| rs14613    | chr19:763209               | PTBP1:miR-522          |
| rs1803282  | chr19:1224079              | CIRBP:miR-122a         |
| rs1061828  | chr19:1876970              | SCAMP4:miR-410         |
| rs1801938  | chr19:2052071              | AP3D1:miR-613          |
| rs1801938  | chr19:2052071              | AP3D1:miR-409-3p       |
| rs1801940  | chr19:2052165              | AP3D1:miR-573          |
| rs56065950 | chr19:2787196              | ZNF554:miR-100         |
| rs56065950 | chr19:2787196              | ZNF554:miR-99a         |
| rs56065950 | chr19:2787196              | ZNF554:miR-99b         |
| rs11556288 | chr19:3072334              | GNA11:miR-548d         |
| rs11556288 | chr19:3072334              | GNA11:miR-577          |
| rs3746065  | chr19:3160559              | NCLN:miR-135a          |
| rs3746065  | chr19:3160559              | NCLN:miR-135b          |
| rs3746065  | chr19:3160559              | NCLN:miR-584           |
| rs60115562 | chr19:3997447              | ZBTB7A:miR-511         |
| rs35852038 | chr19:4453200              | KIAA1881:miR-522       |
| rs35852038 | chr19:4453200              | KIAA1881:miR-140       |
| rs8887     | chr19:4453201              | KIAA1881:miR-522       |
| rs8887     | chr19:4453201              | KIAA1881:miR-140       |
| rs8887     | chr19:4453201              | HDGF2:miR-548d         |
| rs12840    | chr19:5156626              | PTPRS:miR-492          |
| rs60505727 | chr19:5156956              | PTPRS:miR-190          |
| rs10615177 | chr19:6364676              | KHSRP:miR-561          |
| rs1049232  | chr19:6702293              | TRIP10:miR-519a        |
| rs1049232  | chr19:6702293              | TRIP10:miR-519b        |
| rs1049232  | chr19:6702293              | TRIP10:miR-519c        |
| rs1049232  | chr19:6702293              | TRIP10:miR-18a         |
| rs1049232  | chr19:6702293              | TRIP10:miR-18b         |
| rs3209638  | chr19:7066883              | INSR:miR-135a          |
| rs3209638  | chr19:7066883              | INSR:miR-135b          |
| rs4804293  | chr19:7067706              | INSR:miR-593           |
| rs4804293  | chr19:7067706              | INSR:miR-545           |
| rs11465404 | chr19:7712483              | CD209:miR-624          |
| rs2307000  | chr19:7835531              | EVI5L:miR-96           |
| rs62123115 | chr19:7930161              | ELAVL1:miR-559         |
| rs59164681 | chr19:8233139              | LASS4:miR-650          |
| rs59164681 | chr19:8233139              | LASS4:miR-620          |
| rs12977468 | chr19:9624152              | ZNF562:miR-622         |
| rs45587445 | chr19:10439915             | PDE4A:miR-7            |
| rs1140864  | chr19:10524791             | ATG4D:miR-577          |
| rs3745257  | chr19:10525008             | ATG4D:miR-19a          |

**Supplemental Table 4: SNPs in miRNA target sites based on PITA prediction**

| <b>SNP</b> | <b>SNP Position (hg18)</b> | <b>PITA Prediction</b> |
|------------|----------------------------|------------------------|
| rs3745257  | chr19:10525008             | ATG4D:miR-19b          |
| rs11543972 | chr19:10893915             | CARM1:miR-563          |
| rs10418658 | chr19:11033783             | SMARCA4:miR-101        |
| rs892113   | chr19:11136934             | ANKRD25:miR-526b       |
| rs892113   | chr19:11136934             | ANKRD25:miR-432        |
| rs56214729 | chr19:11425661             | ELAVL3:miR-511         |
| rs1052589  | chr19:12702485             | MGC2803:miR-384        |
| rs1061500  | chr19:12764933             | JUNB:miR-663           |
| rs35777282 | chr19:13178346             | CACNA1A:miR-583        |
| rs3087661  | chr19:14091397             | ASF1B:miR-424          |
| rs3177148  | chr19:15086519             | SYDE1:miR-151          |
| rs10236    | chr19:15086619             | SYDE1:miR-125a         |
| rs10236    | chr19:15086619             | SYDE1:miR-125b         |
| rs3177151  | chr19:15086787             | SYDE1:miR-649          |
| rs7247906  | chr19:15132135             | NOTCH3:miR-559         |
| rs7247906  | chr19:15132135             | NOTCH3:miR-577         |
| rs11555160 | chr19:15218942             | BRD4:miR-568           |
| rs11555160 | chr19:15218942             | BRD4:miR-524*          |
| rs15308    | chr19:15394032             | WIZ:miR-559            |
| rs15308    | chr19:15394032             | WIZ:miR-577            |
| rs35085716 | chr19:17184410             | MYO9B:miR-524*         |
| rs1044693  | chr19:18840010             | UPF1:miR-542-3p        |
| rs1064393  | chr19:19221862             | CSPG3:miR-568          |
| rs60363472 | chr19:19864803             | ZNF253:miR-340         |
| rs7250542  | chr19:20595418             | ZNF626:miR-26a         |
| rs7250542  | chr19:20595418             | ZNF626:miR-26b         |
| rs7250542  | chr19:20595418             | ZNF626:miR-15a         |
| rs7250542  | chr19:20595418             | ZNF626:miR-15b         |
| rs7250542  | chr19:20595418             | ZNF626:miR-16          |
| rs7250542  | chr19:20595418             | ZNF626:miR-195         |
| rs7250542  | chr19:20595418             | ZNF626:miR-497         |
| rs12150926 | chr19:20598417             | ZNF626:miR-151         |
| rs34694861 | chr19:23715184             | ZNF681:miR-613         |
| rs3218074  | chr19:35007016             | CCNE1:miR-15a          |
| rs3218074  | chr19:35007016             | CCNE1:miR-15b          |
| rs3218074  | chr19:35007016             | CCNE1:miR-16           |
| rs3218074  | chr19:35007016             | CCNE1:miR-195          |
| rs3218074  | chr19:35007016             | CCNE1:miR-497          |
| rs3745796  | chr19:35740560             | ZNF536:miR-10a         |
| rs3745796  | chr19:35740560             | ZNF536:miR-10b         |
| rs8151     | chr19:36457892             | TSHZ3:miR-765          |
| rs1048011  | chr19:36457897             | TSHZ3:miR-765          |
| rs1048011  | chr19:36457897             | TSHZ3:miR-191          |
| rs36121535 | chr19:37567666             | ZNF507:miR-583         |
| rs36113389 | chr19:37779865             | ANKRD27:miR-493-5p     |
| rs58260322 | chr19:37779916             | ANKRD27:miR-513        |
| rs34017519 | chr19:38483051             | CEBPA:miR-548d         |
| rs34017519 | chr19:38483051             | CEBPA:miR-488          |
| rs34017519 | chr19:38483051             | CEBPA:miR-577          |
| rs41367646 | chr19:38483723             | CEBPA:miR-488          |
| rs1044041  | chr19:39410783             | LSM14A:miR-381         |
| rs1043070  | chr19:39652248             | UBA2:miR-609           |

**Supplemental Table 4: SNPs in miRNA target sites based on PITA prediction**

| <b>SNP</b> | <b>SNP Position (hg18)</b> | <b>PITA Prediction</b> |
|------------|----------------------------|------------------------|
| rs11538138 | chr19:39652449             | UBA2:miR-153           |
| rs1802473  | chr19:39652609             | UBA2:miR-659           |
| rs10561    | chr19:40462485             | USF2:miR-587           |
| rs2239915  | chr19:41198079             | CLIPR-59:miR-515-5p    |
| rs2239915  | chr19:41198079             | CLIPR-59:miR-519e*     |
| rs34359575 | chr19:43389905             | SIPA1L3:miR-511        |
| rs55808893 | chr19:43912057             | ACTN4:miR-766          |
| rs55808893 | chr19:43912057             | ACTN4:miR-18a*         |
| rs55808893 | chr19:43912057             | ACTN4:miR-346          |
| rs55808893 | chr19:43912057             | ACTN4:miR-596          |
| rs3208236  | chr19:43912847             | ACTN4:miR-518c*        |
| rs3208236  | chr19:43912847             | CAPN12:miR-518f*       |
| rs3208236  | chr19:43912847             | CAPN12:miR-520a*       |
| rs3208236  | chr19:43912847             | CAPN12:miR-525         |
| rs3208236  | chr19:43912847             | CAPN12:miR-526a        |
| rs3208236  | chr19:43912847             | CAPN12:miR-526c        |
| rs36122262 | chr19:44019103             | HNRPL:miR-583          |
| rs34202355 | chr19:44591692             | ZFP36:miR-651          |
| rs17879933 | chr19:44591762             | ZFP36:miR-583          |
| rs14860    | chr19:44591764             | ZFP36:miR-656          |
| rs1042905  | chr19:44591831             | ZFP36:miR-633          |
| rs1049717  | chr19:45576171             | PLD3:miR-654           |
| rs11555184 | chr19:45773895             | SPTBN4:miR-559         |
| rs34788614 | chr19:46006026             | EGLN2:miR-645          |
| rs35253707 | chr19:46214827             | CYP2B6:miR-612         |
| rs35253707 | chr19:46214827             | CYP2B6:miR-635         |
| rs35253707 | chr19:46214827             | CYP2B6:miR-661         |
| rs35584276 | chr19:46215360             | CYP2B6:miR-566         |
| rs62119601 | chr19:47285740             | POU2F2:miR-568         |
| rs1052054  | chr19:47491554             | CIC:miR-625            |
| rs1052064  | chr19:47491606             | CIC:miR-18a            |
| rs1052064  | chr19:47491606             | CIC:miR-18b            |
| rs1052064  | chr19:47491606             | CIC:miR-520g           |
| rs1052064  | chr19:47491606             | CIC:miR-520h           |
| rs1046880  | chr19:49954763             | BCL3:miR-513           |
| rs1046881  | chr19:49954765             | BCL3:miR-513           |
| rs28381258 | chr19:50669274             | FOSB:miR-571           |
| rs1801948  | chr19:50680446             | RTN2:miR-326           |
| rs1051898  | chr19:50721705             | VASP:miR-583           |
| rs10426889 | chr19:51585798             | PPP5C:miR-202*         |
| rs45474992 | chr19:52416404             | BBC3:miR-149           |
| rs7251936  | chr19:53833095             | CA11:miR-630           |
| rs11553314 | chr19:54161929             | FTL:miR-579            |
| rs1042336  | chr19:54163259             | GYS1:miR-483           |
| rs4802546  | chr19:54262498             | KCNA7:miR-26a          |
| rs4802546  | chr19:54262498             | KCNA7:miR-26b          |
| rs1043534  | chr19:54625311             | SLC17A7:miR-125a       |
| rs1043534  | chr19:54625311             | SLC17A7:miR-125b       |
| rs11047    | chr19:55055689             | PTOV1:miR-597          |
| rs41483344 | chr19:55578023             | NR1H2:miR-577          |
| rs3890434  | chr19:56524083             | LOC402665:miR-608      |
| rs60928654 | chr19:56524920             | LOC402665:miR-138      |



**Supplemental Table 4: SNPs in miRNA target sites based on PITA prediction**

| <b>SNP</b> | <b>SNP Position (hg18)</b> | <b>PITA Prediction</b> |
|------------|----------------------------|------------------------|
| rs11318311 | chr19:57708403             | ZNF578:miR-583         |
| rs1139938  | chr19:58034311             | ZNF468:miR-136         |
| rs1139938  | chr19:58034311             | ZNF468:miR-340         |
| rs35645066 | chr19:59664067             | LENG8:miR-491          |
| rs3745438  | chr19:59664730             | LENG8:miR-583          |
| rs1058511  | chr19:60551251             | SUV420H2:miR-498       |
| rs6050226  | chr20:256923               | SOX12:miR-485-5p       |
| rs1047548  | chr20:257075               | SOX12:miR-492          |
| rs1056976  | chr20:412502               | CSNK2A1:miR-564        |
| rs6116987  | chr20:590750               | SCRT2:miR-527          |
| rs45553532 | chr20:1298300              | FKBP1A:miR-424         |
| rs11550413 | chr20:1298481              | FKBP1A:miR-412         |
| rs55761341 | chr20:1868489              | SIRPA:miR-561          |
| rs56411057 | chr20:1868490              | SIRPA:miR-561          |
| rs3209499  | chr20:2077179              | STK35:miR-135a         |
| rs3209499  | chr20:2077179              | STK35:miR-135b         |
| rs11538787 | chr20:3178050              | C20orf194:miR-559      |
| rs11481874 | chr20:3575840              | ATRN:miR-582           |
| rs11481874 | chr20:3575840              | ATRN:miR-153           |
| rs11481874 | chr20:3575840              | ATRN:miR-557           |
| rs11481874 | chr20:3575840              | ATRN:miR-129           |
| rs34162845 | chr20:3575841              | ATRN:miR-153           |
| rs34162845 | chr20:3575841              | ATRN:miR-557           |
| rs34162845 | chr20:3575841              | ATRN:miR-129           |
| rs3830952  | chr20:3575846              | ATRN:miR-129           |
| rs10626102 | chr20:3575925              | ATRN:miR-579           |
| rs33918224 | chr20:3575926              | ATRN:miR-579           |
| rs1064833  | chr20:3576312              | ATRN:miR-576           |
| rs3215678  | chr20:3579520              | ATRN:miR-496           |
| rs34563953 | chr20:4782225              | SLC23A2:miR-642        |
| rs1131382  | chr20:4782338              | SLC23A2:miR-144        |
| rs1131382  | chr20:4782338              | SLC23A2:miR-142-5p     |
| rs2715     | chr20:5029049              | C20orf30:miR-137       |
| rs2821     | chr20:5853779              | CHGB:miR-363*          |
| rs6140085  | chr20:6708128              | BMP2:miR-568           |
| rs35995067 | chr20:6708561              | BMP2:miR-204           |
| rs35995067 | chr20:6708561              | BMP2:miR-211           |
| rs55856286 | chr20:7812081              | HAO1:miR-335           |
| rs6077451  | chr20:8811420              | PLCB1:miR-559          |
| rs41275596 | chr20:8811458              | PLCB1:miR-517*         |
| rs11906786 | chr20:8812492              | PLCB1:miR-527          |
| rs3746544  | chr20:10235084             | SNAP25:miR-769-5p      |
| rs1051312  | chr20:10235088             | SNAP25:miR-769-5p      |
| rs1051312  | chr20:10235088             | SNAP25:miR-510         |
| rs57008212 | chr20:10235730             | SNAP25:miR-424         |
| rs57008212 | chr20:10235730             | SNAP25:miR-335         |
| rs8636     | chr20:10235742             | SNAP25:miR-494         |
| rs8636     | chr20:10235742             | SNAP25:miR-641         |
| rs7828     | chr20:10567014             | JAG1:miR-142-5p        |
| rs3840074  | chr20:10567296             | JAG1:miR-186           |
| rs3842434  | chr20:10567667             | JAG1:miR-559           |
| rs3177118  | chr20:11853642             | BTBD3:miR-634          |

**Supplemental Table 4: SNPs in miRNA target sites based on PITA prediction**

| <b>SNP</b> | <b>SNP Position (hg18)</b> | <b>PITA Prediction</b> |
|------------|----------------------------|------------------------|
| rs3171277  | chr20:11855051             | BTBD3:miR-139          |
| rs3171277  | chr20:11855051             | BTBD3:miR-17-3p        |
| rs6660     | chr20:11855058             | BTBD3:miR-139          |
| rs6660     | chr20:11855058             | BTBD3:miR-17-3p        |
| rs6660     | chr20:11855058             | BTBD3:miR-647          |
| rs11907325 | chr20:17535933             | DSTN:miR-448           |
| rs13734    | chr20:17542729             | RRBP1:miR-661          |
| rs6046271  | chr20:19650171             | SLC24A3:miR-452*       |
| rs6046271  | chr20:19650171             | SLC24A3:miR-132        |
| rs6046271  | chr20:19650171             | SLC24A3:miR-212        |
| rs6136919  | chr20:19961935             | NAT5:miR-499           |
| rs7272722  | chr20:20298834             | INSM1:miR-509          |
| rs62202152 | chr20:22510125             | FOXA2:miR-617          |
| rs16435    | chr20:23303456             | NAPB:miR-200b          |
| rs16435    | chr20:23303456             | NAPB:miR-200c          |
| rs16435    | chr20:23303456             | NAPB:miR-429           |
| rs11467962 | chr20:23303457             | NAPB:miR-200b          |
| rs11467962 | chr20:23303457             | NAPB:miR-200c          |
| rs11467962 | chr20:23303457             | NAPB:miR-429           |
| rs2811     | chr20:29657909             | ID1:miR-30a-3p         |
| rs2811     | chr20:29657909             | ID1:miR-30e-3p         |
| rs3208684  | chr20:29716466             | BCL2L1:let-7e          |
| rs3208684  | chr20:29716466             | BCL2L1:miR-491         |
| rs45565933 | chr20:30082498             | C20orf160:miR-562      |
| rs1056776  | chr20:30246204             | PLAGL2:miR-618         |
| rs1056776  | chr20:30246204             | PLAGL2:miR-370         |
| rs34271817 | chr20:30489193             | ASXL1:miR-7            |
| rs34271817 | chr20:30489193             | ASXL1:miR-608          |
| rs2295762  | chr20:30489196             | ASXL1:miR-608          |
| rs1061992  | chr20:30900342             | MAPRE1:miR-203         |
| rs57756287 | chr20:30900396             | MAPRE1:miR-801         |
| rs57756287 | chr20:30900396             | MAPRE1:miR-200b        |
| rs57756287 | chr20:30900396             | MAPRE1:miR-200c        |
| rs57756287 | chr20:30900396             | MAPRE1:miR-429         |
| rs6119292  | chr20:30901144             | MAPRE1:miR-610         |
| rs14688    | chr20:30901743             | MAPRE1:miR-583         |
| rs11542525 | chr20:31905632             | CHMP4B:miR-607         |
| rs34285280 | chr20:32561286             | ITCH:miR-95            |
| rs1569928  | chr20:32561910             | ITCH:miR-186           |
| rs56079857 | chr20:32611604             | MAP1LC3A:miR-637       |
| rs7344208  | chr20:32764118             | TP53INP2:miR-548c      |
| rs16440    | chr20:32766463             | NCOA6:miR-369-3p       |
| rs16440    | chr20:32766463             | NCOA6:miR-655          |
| rs11546156 | chr20:32896676             | GGTL3:miR-324-5p       |
| rs3205397  | chr20:33328155             | MMP24:miR-203          |
| rs3205397  | chr20:33328155             | MMP24:miR-223          |
| rs6060538  | chr20:33702241             | RBM12:miR-613          |
| rs11554015 | chr20:33703498             | RBM12:miR-335          |
| rs11554016 | chr20:33703775             | RBM12:miR-657          |
| rs11554016 | chr20:33703775             | RBM12:miR-182*         |
| rs45605734 | chr20:34000015             | PHF20:miR-619          |
| rs6121097  | chr20:34000062             | PHF20:miR-527          |

**Supplemental Table 4: SNPs in miRNA target sites based on PITA prediction**

| <b>SNP</b> | <b>SNP Position (hg18)</b> | <b>PITA Prediction</b> |
|------------|----------------------------|------------------------|
| rs1802290  | chr20:35579491             | BLCAP:miR-505          |
| rs62206361 | chr20:35584875             | NNAT:miR-383           |
| rs2037     | chr20:36045078             | KIAA0406:miR-494       |
| rs3180629  | chr20:39185750             | TOP1:miR-382           |
| rs15476    | chr20:39186322             | TOP1:miR-524*          |
| rs57063009 | chr20:39245253             | ZHX3:miR-568           |
| rs2866943  | chr20:40141293             | PTPRT:miR-191*         |
| rs14957    | chr20:41525623             | SFRS6:miR-124a         |
| rs11470448 | chr20:42556602             | C20orf121:miR-126*     |
| rs10536269 | chr20:42556606             | C20orf121:miR-126*     |
| rs11468357 | chr20:42968560             | YWHAB:miR-32           |
| rs11468357 | chr20:42968560             | YWHAB:miR-487b         |
| rs2741487  | chr20:43387479             | SDC4:miR-512-5p        |
| rs2741487  | chr20:43387479             | SDC4:miR-575           |
| rs57543404 | chr20:43388458             | SDC4:miR-186           |
| rs35186241 | chr20:43388461             | SDC4:miR-186           |
| rs3204367  | chr20:43388463             | SDC4:miR-186           |
| rs3204368  | chr20:43388463             | SDC4:miR-186           |
| rs6032451  | chr20:43770465             | WFDC13:miR-554         |
| rs6032451  | chr20:43770465             | WFDC13:miR-182*        |
| rs11537646 | chr20:43878936             | UBE2C:miR-577          |
| rs2664528  | chr20:44122137             | SLC12A5:miR-128a       |
| rs2664528  | chr20:44122137             | SLC12A5:miR-128b       |
| rs11415091 | chr20:44123140             | NCOA5:miR-106a         |
| rs11415091 | chr20:44123140             | NCOA5:miR-106b         |
| rs11415091 | chr20:44123140             | NCOA5:miR-17-5p        |
| rs11415091 | chr20:44123140             | NCOA5:miR-20a          |
| rs11415091 | chr20:44123140             | NCOA5:miR-20b          |
| rs6074057  | chr20:44236150             | CDH22:miR-132          |
| rs6074057  | chr20:44236150             | CDH22:miR-212          |
| rs57501886 | chr20:45718293             | NCOA3:miR-545          |
| rs6095441  | chr20:47163677             | STAU1:miR-302a*        |
| rs59249001 | chr20:47163928             | STAU1:miR-561          |
| rs2664575  | chr20:47295885             | ZNFX1:miR-18a          |
| rs2664575  | chr20:47295885             | ZNFX1:miR-18b          |
| rs2664575  | chr20:47295885             | ZNFX1:miR-519a         |
| rs2664575  | chr20:47295885             | ZNFX1:miR-519b         |
| rs2664575  | chr20:47295885             | ZNFX1:miR-519c         |
| rs2664575  | chr20:47295885             | ZNFX1:miR-153          |
| rs59480777 | chr20:47295905             | ZNFX1:miR-583          |
| rs60668569 | chr20:47295907             | ZNFX1:miR-583          |
| rs60668569 | chr20:47295907             | ZNFX1:miR-519a         |
| rs60668569 | chr20:47295907             | ZNFX1:miR-519b         |
| rs60668569 | chr20:47295907             | ZNFX1:miR-519c         |
| rs1061510  | chr20:47296046             | ZNFX1:miR-558          |
| rs2664551  | chr20:47422132             | KCNB1:miR-511          |
| rs2664532  | chr20:48131188             | UBE2V1:miR-362         |
| rs59124899 | chr20:48131930             | UBE2V1:miR-135a        |
| rs59124899 | chr20:48131930             | UBE2V1:miR-135b        |
| rs6067490  | chr20:48633727             | PTPN1:miR-613          |
| rs45624032 | chr20:48802269             | PAR6B:miR-18a          |
| rs45624032 | chr20:48802269             | PAR6B:miR-18b          |

**Supplemental Table 4: SNPs in miRNA target sites based on PITA prediction**

| <b>SNP</b> | <b>SNP Position (hg18)</b> | <b>PITA Prediction</b> |
|------------|----------------------------|------------------------|
| rs11469346 | chr20:48803014             | PARD6B:let-7a          |
| rs11469346 | chr20:48803014             | PARD6B:let-7b          |
| rs11469346 | chr20:48803014             | PARD6B:let-7c          |
| rs11469346 | chr20:48803014             | PARD6B:let-7d          |
| rs11469346 | chr20:48803014             | PARD6B:let-7f          |
| rs11469346 | chr20:48803014             | PARD6B:let-7g          |
| rs11469346 | chr20:48803014             | PARD6B:let-7i          |
| rs11469346 | chr20:48803014             | PARD6B:miR-98          |
| rs1056949  | chr20:51617096             | ZNF217:miR-653         |
| rs11439533 | chr20:54006173             | CBLN4:miR-548b         |
| rs11439533 | chr20:54006173             | CBLN4:miR-548c         |
| rs58202615 | chr20:54006174             | CBLN4:miR-548b         |
| rs58202615 | chr20:54006174             | CBLN4:miR-548c         |
| rs1065289  | chr20:55416187             | RNPC1:miR-485-5p       |
| rs16980970 | chr20:55416264             | RNPC1:miR-363          |
| rs34804663 | chr20:55656864             | TMEPAI:miR-186         |
| rs11481842 | chr20:55660032             | TMEPAI:miR-570         |
| rs14856    | chr20:56375783             | RAB22A:miR-548c        |
| rs6128327  | chr20:56375963             | RAB22A:miR-30a-5p      |
| rs6128327  | chr20:56375963             | RAB22A:miR-30b         |
| rs6128327  | chr20:56375963             | RAB22A:miR-30c         |
| rs6128327  | chr20:56375963             | RAB22A:miR-30d         |
| rs6128327  | chr20:56375963             | RAB22A:miR-30e-5p      |
| rs6070466  | chr20:56453450             | VAPB:miR-578           |
| rs61713651 | chr20:56453967             | VAPB:miR-153           |
| rs14943    | chr20:56687833             | STX16:miR-381          |
| rs35295928 | chr20:56687929             | STX16:miR-568          |
| rs11554276 | chr20:56904074             | GNAS:miR-660           |
| rs11554276 | chr20:56904074             | GNAS:miR-302c*         |
| rs3730166  | chr20:56912193             | GNAS:miR-337           |
| rs11554274 | chr20:56913879             | GNAS:miR-521           |
| rs8620     | chr20:56917636             | GNAS:miR-622           |
| rs11554273 | chr20:56917815             | GNAS:miR-594           |
| rs62205367 | chr20:56918147             | GNAS:miR-526b          |
| rs1802357  | chr20:56918239             | GNAS:miR-526b          |
| rs3205253  | chr20:56918834             | GNAS:miR-326           |
| rs11554269 | chr20:56919147             | GNAS:miR-34a           |
| rs11554269 | chr20:56919147             | GNAS:miR-34c           |
| rs11554269 | chr20:56919147             | GNAS:miR-449           |
| rs11554269 | chr20:56919147             | GNAS:miR-449b          |
| rs151357   | chr20:57042450             | C20orf45:miR-767-5p    |
| rs6070699  | chr20:57042613             | C20orf45:miR-182       |
| rs59109611 | chr20:57267532             | C20orf174:miR-589      |
| rs1045844  | chr20:57856056             | PHACTR3:miR-369-3p     |
| rs1045844  | chr20:57856056             | PHACTR3:miR-374        |
| rs3833338  | chr20:60902061             | C20orf20:miR-33        |
| rs3833338  | chr20:60902061             | C20orf20:miR-586       |
| rs41279364 | chr20:60902154             | C20orf20:miR-410       |
| rs12625609 | chr20:60943383             | TCFL5:miR-585          |
| rs12625401 | chr20:60943384             | TCFL5:miR-585          |
| rs10712259 | chr20:61845822             | SLC2A4RG:miR-302c*     |
| rs60585835 | chr20:62059092             | GM632:let-7e           |

**Supplemental Table 4: SNPs in miRNA target sites based on PITA prediction**

| <b>SNP</b> | <b>SNP Position (hg18)</b> | <b>PITA Prediction</b> |
|------------|----------------------------|------------------------|
| rs6011356  | chr20:62343746             | MYT1:miR-653           |
| rs8133159  | chr21:10042765             | BAGE2:miR-22           |
| rs8133159  | chr21:10042765             | BAGE4:miR-22           |
| rs9712674  | chr21:10042996             | BAGE2:miR-422b         |
| rs9712674  | chr21:10042996             | BAGE4:miR-422b         |
| rs7278465  | chr21:10048608             | BAGE2:miR-410          |
| rs7278465  | chr21:10048608             | BAGE5:miR-410          |
| rs8175341  | chr21:10060663             | BAGE2:miR-223          |
| rs8175341  | chr21:10060663             | BAGE4:miR-223          |
| rs56253511 | chr21:10060673             | BAGE2:miR-134          |
| rs56253511 | chr21:10060673             | BAGE4:miR-134          |
| rs9941890  | chr21:10060691             | BAGE2:miR-382          |
| rs9941890  | chr21:10060691             | BAGE3:miR-382          |
| rs2698623  | chr21:10061265             | BAGE2:miR-452*         |
| rs2698623  | chr21:10061265             | BAGE5:miR-452*         |
| rs28571918 | chr21:10071467             | BAGE4:miR-32           |
| rs17002662 | chr21:14666401             | STCH:miR-142-5p        |
| rs60851456 | chr21:15256230             | NRIP1:miR-568          |
| rs58275735 | chr21:15256234             | NRIP1:miR-568          |
| rs58275735 | chr21:15256234             | NRIP1:miR-142-5p       |
| rs34337877 | chr21:15258146             | NRIP1:miR-576          |
| rs35548482 | chr21:16172921             | USP25:miR-335          |
| rs58652636 | chr21:17887948             | BTG3:miR-142-5p        |
| rs3833344  | chr21:17887954             | BTG3:miR-142-5p        |
| rs3833344  | chr21:17887954             | BTG3:miR-559           |
| rs3833344  | chr21:17887954             | BTG3:miR-376a*         |
| rs2824386  | chr21:17887960             | BTG3:miR-376a*         |
| rs15459    | chr21:17888007             | BTG3:miR-421           |
| rs2051357  | chr21:18560988             | CHODL:miR-126*         |
| rs11909235 | chr21:18561066             | CHODL:miR-584          |
| rs11909235 | chr21:18561066             | CHODL:miR-641          |
| rs2694     | chr21:26063609             | GABPA:miR-302c*        |
| rs229077   | chr21:27217210             | ADAMTS5:miR-519a       |
| rs229077   | chr21:27217210             | ADAMTS5:miR-519b       |
| rs229077   | chr21:27217210             | ADAMTS5:miR-519c       |
| rs58326035 | chr21:31413312             | TIAM1:miR-186          |
| rs17551019 | chr21:31413650             | TIAM1:miR-376a*        |
| rs41275634 | chr21:34131882             | ITSN1:miR-487b         |
| rs35280535 | chr21:34391597             | SLC5A3:miR-153         |
| rs4817620  | chr21:34392080             | SLC5A3:miR-383         |
| rs2850036  | chr21:34393355             | SLC5A3:miR-524         |
| rs2850036  | chr21:34393355             | SLC5A3:miR-525*        |
| rs2850036  | chr21:34393355             | SLC5A3:miR-124a        |
| rs1060272  | chr21:34810737             | DSCR1:miR-518b         |
| rs1060272  | chr21:34810737             | DSCR1:miR-518c         |
| rs1060272  | chr21:34810737             | DSCR1:miR-518d         |
| rs1060272  | chr21:34810737             | DSCR1:miR-518a         |
| rs1060272  | chr21:34810737             | DSCR1:miR-518e         |
| rs1060272  | chr21:34810737             | DSCR1:miR-518f         |
| rs14676    | chr21:34810825             | DSCR1:miR-580          |
| rs55761346 | chr21:35084618             | RUNX1:miR-592          |
| rs61311412 | chr21:35085371             | RUNX1:miR-23a          |

**Supplemental Table 4: SNPs in miRNA target sites based on PITA prediction**

| <b>SNP</b> | <b>SNP Position (hg18)</b> | <b>PITA Prediction</b> |
|------------|----------------------------|------------------------|
| rs61311412 | chr21:35085371             | RUNX1:miR-23b          |
| rs61311412 | chr21:35085371             | RUNX1:miR-323          |
| rs35658312 | chr21:36670327             | MORC3:miR-380-3p       |
| rs55720916 | chr21:37806447             | DYRK1A:miR-654         |
| rs1803439  | chr21:37807312             | DYRK1A:miR-218         |
| rs59406559 | chr21:37808515             | DYRK1A:miR-373*        |
| rs1801348  | chr21:38676026             | ERG:miR-625            |
| rs11540409 | chr21:39117877             | ETS2:miR-559           |
| rs11701857 | chr21:39591846             | BRWD1:miR-610          |
| rs3988444  | chr21:39636400             | HMGN1:miR-382          |
| rs35306807 | chr21:39636424             | HMGN1:miR-520d*        |
| rs60176667 | chr21:39636427             | HMGN1:miR-520d*        |
| rs3988446  | chr21:39636722             | HMGN1:miR-545          |
| rs3988446  | chr21:39636722             | HMGN1:miR-522          |
| rs16999177 | chr21:40306428             | DSCAM:miR-339          |
| rs36206482 | chr21:43323440             | PKNOX1:miR-521         |
| rs9325621  | chr21:43323440             | PKNOX1:miR-521         |
| rs62219526 | chr21:43323504             | PKNOX1:miR-186         |
| rs1065257  | chr21:43658914             | SNF1LK:miR-143         |
| rs1065257  | chr21:43658914             | SNF1LK:miR-577         |
| rs1065257  | chr21:43658914             | SNF1LK:miR-142-5p      |
| rs5746428  | chr22:16412975             | CECR2:miR-337          |
| rs55775531 | chr22:17499329             | DGCR14:miR-611         |
| rs56279111 | chr22:17499502             | DGCR14:miR-489         |
| rs35335239 | chr22:19634369             | CRKL:miR-145           |
| rs6005034  | chr22:19637397             | CRKL:miR-598           |
| rs5753562  | chr22:20133190             | HIC2:miR-372           |
| rs5753562  | chr22:20133190             | HIC2:miR-93            |
| rs9609460  | chr22:20134583             | HIC2:miR-644           |
| rs13058    | chr22:20447502             | MAPK1:miR-186          |
| rs41282607 | chr22:20448229             | MAPK1:miR-606          |
| rs41282607 | chr22:20448229             | MAPK1:miR-217          |
| rs1803546  | chr22:20448410             | MAPK1:miR-515-5p       |
| rs1803546  | chr22:20448410             | MAPK1:miR-519e*        |
| rs1048752  | chr22:20448433             | MAPK1:miR-555          |
| rs56132841 | chr22:21796386             | GNAZ:miR-589           |
| rs56032301 | chr22:21796388             | GNAZ:miR-589           |
| rs710189   | chr22:21988705             | BCR:miR-600            |
| rs3876093  | chr22:21988735             | BCR:miR-186            |
| rs35849189 | chr22:24077584             | LRP5L:miR-138          |
| rs11379447 | chr22:26476768             | MN1:miR-490            |
| rs14963    | chr22:27520643             | XBP1:miR-496           |
| rs14963    | chr22:27520643             | XBP1:miR-153           |
| rs1064181  | chr22:27521258             | XBP1:miR-491           |
| rs34605658 | chr22:27781172             | ZNRF3:miR-586          |
| rs61337029 | chr22:27781659             | ZNRF3:miR-143          |
| rs3178915  | chr22:27783027             | ZNRF3:miR-515-3p       |
| rs60214892 | chr22:27783409             | ZNRF3:miR-7            |
| rs60214892 | chr22:27783409             | ZNRF3:miR-368          |
| rs61737736 | chr22:28037748             | GAS2L1:miR-326         |
| rs9613860  | chr22:28037955             | GAS2L1:miR-147         |
| rs41282479 | chr22:29302680             | PES1:miR-125a          |

**Supplemental Table 4: SNPs in miRNA target sites based on PITA prediction**

| <b>SNP</b> | <b>SNP Position (hg18)</b> | <b>PITA Prediction</b> |
|------------|----------------------------|------------------------|
| rs41282479 | chr22:29302680             | PES1:miR-125b          |
| rs62238097 | chr22:29652614             | MORC2:miR-559          |
| rs28446182 | chr22:29932961             | RNF185:miR-224         |
| rs35349745 | chr22:30008402             | MGC17330:miR-613       |
| rs56801236 | chr22:30052874             | ZNF278:miR-646         |
| rs2240426  | chr22:30052953             | ZNF278:miR-132         |
| rs2240426  | chr22:30052953             | ZNF278:miR-212         |
| rs15086    | chr22:30344565             | PISD:miR-429           |
| rs34122600 | chr22:30683493             | YWHAH:miR-563          |
| rs1804710  | chr22:31585477             | TIMP3:miR-372          |
| rs1804710  | chr22:31585477             | TIMP3:miR-93           |
| rs11704223 | chr22:31586163             | TIMP3:miR-30a-3p       |
| rs11704223 | chr22:31586163             | TIMP3:miR-30e-3p       |
| rs1143552  | chr22:31586174             | TIMP3:miR-181b         |
| rs1143552  | chr22:31586174             | TIMP3:miR-181d         |
| rs1802676  | chr22:31586327             | TIMP3:miR-620          |
| rs1802680  | chr22:31588951             | TIMP3:miR-144          |
| rs3202694  | chr22:31588997             | TIMP3:miR-651          |
| rs1801820  | chr22:31999178             | LARGE:miR-30a-5p       |
| rs1801820  | chr22:31999178             | LARGE:miR-30b          |
| rs1801820  | chr22:31999178             | LARGE:miR-30c          |
| rs1801820  | chr22:31999178             | LARGE:miR-30d          |
| rs1801820  | chr22:31999178             | LARGE:miR-30e-5p       |
| rs60041812 | chr22:34021596             | HMG2L1:miR-568         |
| rs5755721  | chr22:34120168             | HMOX1:miR-377          |
| rs14870    | chr22:34464773             | RBM9:miR-527           |
| rs41283203 | chr22:34465560             | RBM9:miR-429           |
| rs28562663 | chr22:34469783             | RBM9:miR-593           |
| rs28562663 | chr22:34469783             | RBM9:miR-624           |
| rs8226     | chr22:35007360             | MYH9:miR-124a          |
| rs8226     | chr22:35007360             | MYH9:miR-524           |
| rs8226     | chr22:35007360             | MYH9:miR-525*          |
| rs5995275  | chr22:35007431             | MYH9:miR-769-3p        |
| rs139999   | chr22:35193321             | TXN2:miR-520d*         |
| rs8141371  | chr22:36698516             | SOX10:miR-596          |
| rs1063237  | chr22:36941975             | MAFF:miR-142-5p        |
| rs9607526  | chr22:37016780             | CSNK1E:miR-142-5p      |
| rs1054208  | chr22:37016876             | CSNK1E:miR-495         |
| rs11548925 | chr22:37016880             | CSNK1E:miR-495         |
| rs1054207  | chr22:37016886             | CSNK1E:miR-559         |
| rs1054207  | chr22:37016886             | CSNK1E:miR-577         |
| rs1054207  | chr22:37016886             | CSNK1E:miR-142-5p      |
| rs1054207  | chr22:37016886             | CSNK1E:miR-559         |
| rs16998989 | chr22:37209441             | DDX17:miR-361          |
| rs12297    | chr22:37209508             | DDX17:miR-154*         |
| rs12297    | chr22:37209508             | DDX17:miR-487a         |
| rs11570434 | chr22:37245932             | DMC1:miR-628           |
| rs1053222  | chr22:37590405             | CBX6:miR-765           |
| rs8136600  | chr22:37856989             | CBX7:miR-518a          |
| rs8136600  | chr22:37856989             | CBX7:miR-518e          |
| rs8136600  | chr22:37856989             | CBX7:miR-518f          |
| rs1804440  | chr22:37949706             | PDGFB:miR-559          |

**Supplemental Table 4: SNPs in miRNA target sites based on PITA prediction**

| <b>SNP</b> | <b>SNP Position (hg18)</b> | <b>PITA Prediction</b> |
|------------|----------------------------|------------------------|
| rs1804440  | chr22:37949706             | PDGFB:miR-577          |
| rs56031201 | chr22:37949760             | PDGFB:miR-650          |
| rs56111992 | chr22:38415556             | CACNA11:miR-220        |
| rs11912126 | chr22:39049973             | TNRC6B:miR-654         |
| rs41281265 | chr22:39050650             | TNRC6B:miR-432         |
| rs41281265 | chr22:39050650             | TNRC6B:miR-518a        |
| rs41281265 | chr22:39050650             | TNRC6B:miR-518e        |
| rs41281265 | chr22:39050650             | TNRC6B:miR-518f        |
| rs4821943  | chr22:39052691             | TNRC6B:miR-378         |
| rs10534254 | chr22:39057596             | TNRC6B:miR-548c        |
| rs28562917 | chr22:39061245             | TNRC6B:miR-596         |
| rs28562917 | chr22:39061245             | TNRC6B:miR-622         |
| rs9611309  | chr22:39061637             | TNRC6B:miR-577         |
| rs9611309  | chr22:39061637             | TNRC6B:miR-559         |
| rs9611309  | chr22:39061637             | TNRC6B:miR-142-5p      |
| rs9611309  | chr22:39061637             | TNRC6B:miR-577         |
| rs9611309  | chr22:39061637             | TNRC6B:miR-559         |
| rs12373980 | chr22:39552407             | ST13:miR-202           |
| rs11546402 | chr22:40124994             | TEF:miR-577            |
| rs11546402 | chr22:40124994             | TEF:miR-559            |
| rs4085936  | chr22:40160126             | TOB2:miR-519d          |
| rs4085936  | chr22:40160126             | TOB2:miR-519e          |
| rs61757465 | chr22:40252312             | POLR3H:miR-181a*       |
| rs3221808  | chr22:40720830             | SEPT3:miR-31           |
| rs17002787 | chr22:40720963             | SEPT3:miR-610          |
| rs35409916 | chr22:40723996             | SEPT3:miR-331          |
| rs5845526  | chr22:40886601             | TCF20:miR-548d         |
| rs2413683  | chr22:40887028             | TCF20:miR-642          |
| rs4988442  | chr22:41855444             | BIK:miR-146a           |
| rs4988442  | chr22:41855444             | BIK:miR-146b           |
| rs10523718 | chr22:41929310             | SCUBE1:miR-202         |
| rs34799074 | chr22:41929311             | SCUBE1:miR-202         |
| rs16999841 | chr22:47533271             | FAM19A5:miR-422a       |
| rs17001403 | chr22:48667191             | ZBED4:miR-493-5p       |
| rs1061331  | chr22:48667982             | ZBED4:miR-570          |
| rs1061331  | chr22:48667982             | ZBED4:miR-589          |
| rs41280551 | chr22:48668029             | ZBED4:miR-494          |
| rs41280551 | chr22:48668029             | ZBED4:miR-641          |
| rs1053764  | chr22:49232361             | SBF1:miR-30a-5p        |
| rs1053764  | chr22:49232361             | SBF1:miR-30b           |
| rs1053764  | chr22:49232361             | SBF1:miR-30c           |
| rs1053764  | chr22:49232361             | SBF1:miR-30d           |
| rs1053764  | chr22:49232361             | SBF1:miR-30e-5p        |
| rs1053764  | chr22:49232361             | SBF1:miR-302a*         |
| rs35630566 | chr22:49517983             | SHANK3:miR-296         |
| rs5916269  | chrX:5820299               | NLGN4X:miR-487b        |
| rs3175222  | chrX:8457049               | KAL1:miR-517*          |
| rs3175221  | chrX:8457059               | KAL1:miR-542-3p        |
| rs1062629  | chrX:12751216              | PRPS2:miR-516-5p       |
| rs13793    | chrX:13699270              | GPM6B:miR-559          |
| rs5926307  | chrX:23322606              | PTCHD1:miR-30a-3p      |
| rs5926307  | chrX:23322606              | PTCHD1:miR-30e-3p      |



**Supplemental Table 4: SNPs in miRNA target sites based on PITA prediction**

| <b>SNP</b> | <b>SNP Position (hg18)</b> | <b>PITA Prediction</b> |
|------------|----------------------------|------------------------|
| rs1042604  | chrX:24142016              | ZFX:miR-122a           |
| rs5927686  | chrX:31049752              | DMD:miR-139            |
| rs5927686  | chrX:31049752              | DMD:miR-144            |
| rs5927686  | chrX:31049752              | DMD:miR-374            |
| rs1127632  | chrX:34557296              | TMEM47:miR-635         |
| rs2295339  | chrX:40980547              | USP9X:miR-372          |
| rs2295339  | chrX:40980547              | USP9X:miR-93           |
| rs2295339  | chrX:40980547              | USP9X:miR-106a         |
| rs2295339  | chrX:40980547              | USP9X:miR-106b         |
| rs2295339  | chrX:40980547              | USP9X:miR-17-5p        |
| rs2295339  | chrX:40980547              | USP9X:miR-20a          |
| rs2295339  | chrX:40980547              | USP9X:miR-20b          |
| rs1056358  | chrX:41092629              | DDX3X:miR-553          |
| rs708452   | chrX:41094304              | DDX3X:miR-139          |
| rs708452   | chrX:41094304              | DDX3X:miR-17-3p        |
| rs3209046  | chrX:41094370              | DDX3X:miR-383          |
| rs10617    | chrX:46973590              | PCTK1:miR-495          |
| rs3174380  | chrX:47380404              | ELK1:miR-296           |
| rs3027484  | chrX:48703695              | KCND1:miR-30a-3p       |
| rs3027484  | chrX:48703695              | KCND1:miR-30e-3p       |
| rs4565600  | chrX:54114643              | FAM120C:miR-320        |
| rs4565600  | chrX:54114643              | FAM120C:miR-9*         |
| rs3810701  | chrX:63321797              | FAM123B:miR-34b        |
| rs3810701  | chrX:63321797              | FAM123B:miR-34a        |
| rs3810701  | chrX:63321797              | FAM123B:miR-34c        |
| rs3810701  | chrX:63321797              | FAM123B:miR-449        |
| rs3810701  | chrX:63321797              | FAM123B:miR-449b       |
| rs3810701  | chrX:63321797              | FAM123B:miR-148b       |
| rs3810701  | chrX:63321797              | FAM123B:miR-152        |
| rs1056069  | chrX:67978109              | EFNB1:miR-594          |
| rs11602    | chrX:69176003              | EDA:miR-451            |
| rs3183972  | chrX:70376322              | ZMYM3:miR-589          |
| rs1803004  | chrX:70376339              | ZMYM3:miR-553          |
| rs1803001  | chrX:70376478              | ZMYM3:miR-765          |
| rs1803001  | chrX:70376478              | ZMYM3:miR-185          |
| rs3208713  | chrX:70437594              | NONO:miR-558           |
| rs1047458  | chrX:71438263              | CITED1:miR-140         |
| rs3735     | chrX:72823589              | CHIC1:miR-542-3p       |
| rs20385    | chrX:96743056              | DIAPH2:miR-154         |
| rs3211226  | chrX:99434376              | PCDH19:miR-489         |
| rs761844   | chrX:100236846             | TMEM35:miR-493-5p      |
| rs1045299  | chrX:102451048             | BEX2:miR-485-5p        |
| rs1058986  | chrX:102817160             | MORF4L2:miR-647        |
| rs1064553  | chrX:102817323             | MORF4L2:miR-29a        |
| rs1064553  | chrX:102817323             | MORF4L2:miR-29b        |
| rs1064553  | chrX:102817323             | MORF4L2:miR-29c        |
| rs1064553  | chrX:102817323             | MORF4L2:miR-767-5p     |
| rs839377   | chrX:108753958             | KCNE1L:miR-625         |
| rs3027755  | chrX:110905697             | TRPC5:miR-640          |
| rs1801412  | chrX:114048960             | HTR2C:miR-141          |
| rs1801412  | chrX:114048960             | HTR2C:miR-200a         |
| rs1801412  | chrX:114048960             | HTR2C:miR-429          |

**Supplemental Table 4: SNPs in miRNA target sites based on PITA prediction**

| <b>SNP</b> | <b>SNP Position (hg18)</b> | <b>PITA Prediction</b> |
|------------|----------------------------|------------------------|
| rs1804954  | chrX:117809964             | IL13RA1:miR-626        |
| rs1804954  | chrX:117809964             | IL13RA1:miR-558        |
| rs1803722  | chrX:118602287             | UBE2A:miR-577          |
| rs14982    | chrX:118602293             | UBE2A:miR-577          |
| rs5911725  | chrX:122875134             | BIRC4:miR-569          |
| rs3810727  | chrX:130050818             | FLJ30058:miR-594       |
| rs9670     | chrX:135575439             | ARHGEF6:miR-559        |
| rs9670     | chrX:135575439             | ARHGEF6:miR-577        |
| rs10147    | chrX:135783336             | RBMX:miR-521           |
| rs2886083  | chrX:135783343             | RBMX:miR-522           |
| rs850      | chrX:135783662             | RBMX:miR-579           |
| rs2230685  | chrX:135783817             | RBMX:miR-335           |
| rs1062712  | chrX:137541512             | FGF13:miR-493-5p       |
| rs3833400  | chrX:142795674             | UBE2NL:miR-559         |
| rs25722    | chrX:146839569             | FMR1:miR-182           |
| rs29292    | chrX:146840279             | FMR1:miR-132           |
| rs29292    | chrX:146840279             | FMR1:miR-212           |
| rs4636363  | chrX:147880614             | AFF2:let-7e            |
| rs1049521  | chrX:149592032             | MTM1:miR-379           |
| rs3180717  | chrX:149684056             | MTMR1:miR-30a-5p       |
| rs3180717  | chrX:149684056             | MTMR1:miR-30b          |
| rs3180717  | chrX:149684056             | MTMR1:miR-30c          |
| rs3180717  | chrX:149684056             | MTMR1:miR-30d          |
| rs3180717  | chrX:149684056             | MTMR1:miR-30e-5p       |
| rs8230     | chrX:151746562             | CETN2:miR-589          |
| rs2734643  | chrX:152944381             | MECP2:miR-375          |
| rs1063371  | chrX:153324628             | GDI1:miR-651           |
| rs3105275  | chrX:154141626             | RAB39B:miR-433         |
| rs11538310 | chrY:2794961               | RPS4Y1:miR-527         |
| rs2020857  | chrY:13540146              | DDX3Y:miR-28           |
| rs13447375 | chrY:13540272              | DDX3Y:miR-548a         |
| rs2072126  | chrY:13541140              | DDX3Y:miR-424          |

Supplemental Table 5: Consensus SNPs in miRNA target sites

Supplemental Table 5: Consensus SNPs in miRNA target sites

| SNP ID     | SNP Position (hg18) | TargetScanS Prediction      | PITA Prediction    |
|------------|---------------------|-----------------------------|--------------------|
| rs34335657 | chr1:7750490        | CAMTA1:miR-450              | CAMTA1:miR-129     |
| rs11807940 | chr1:12190929       | TNFRSF1B:let-7/98           | TNFRSF1B:let-7e    |
| rs1045038  | chr1:20943854       | HP1BP3:miR-433-3p           | HP1BP3:miR-433     |
| rs897468   | chr1:22022274       | HSPG2:miR-15/16/195/424/497 | HSPG2:miR-424      |
| rs897468   | chr1:22022274       | HSPG2:miR-503               | HSPG2:miR-424      |
| rs41266043 | chr1:22802104       | EPHA8:miR-129-5p            | EPHA8:miR-129      |
| rs41266043 | chr1:22802104       | EPHA8:miR-129-5p            | EPHA8:miR-33       |
| rs41266043 | chr1:22802104       | EPHA8:miR-33                | EPHA8:miR-129      |
| rs41266043 | chr1:22802104       | EPHA8:miR-33                | EPHA8:miR-33       |
| rs41266043 | chr1:22802104       | EPHA8:miR-450               | EPHA8:miR-129      |
| rs41266043 | chr1:22802104       | EPHA8:miR-450               | EPHA8:miR-33       |
| rs11583293 | chr1:25767240       | LDLRAP1:miR-124.2/506       | LDLRAP1:miR-506    |
| rs11583293 | chr1:25767240       | LDLRAP1:miR-124.2/506       | LDLRAP1:miR-593    |
| rs61005297 | chr1:26628494       | LIN28:miR-30-5p:2           | LIN28:miR-302a*    |
| rs61005297 | chr1:26628494       | LIN28:miR-30-5p:2           | LIN28:miR-30a-5p   |
| rs61005297 | chr1:26628494       | LIN28:miR-30-5p:2           | LIN28:miR-30b      |
| rs61005297 | chr1:26628494       | LIN28:miR-30-5p:2           | LIN28:miR-30c      |
| rs61005297 | chr1:26628494       | LIN28:miR-30-5p:2           | LIN28:miR-30d      |
| rs61005297 | chr1:26628494       | LIN28:miR-30-5p:2           | LIN28:miR-30e-5p   |
| rs34672418 | chr1:27594606       | GPR3:miR-135                | GPR3:miR-135a      |
| rs34672418 | chr1:27594606       | GPR3:miR-135                | GPR3:miR-135b      |
| rs1043163  | chr1:31965554       | BAI2:miR-122                | BAI2:miR-122a      |
| rs12405056 | chr1:32281989       | KHDRBS1:miR-34b             | KHDRBS1:miR-379    |
| rs35572238 | chr1:35103759       | DLGAP3:miR-133              | DLGAP3:miR-659     |
| rs11538676 | chr1:40478910       | RLF:miR-495:1               | RLF:miR-495        |
| rs35817790 | chr1:42984662       | LEPRE1:miR-9                | LEPRE1:miR-9       |
| rs55946822 | chr1:43164540       | SLC2A1:miR-410              | SLC2A1:miR-568     |
| rs1859726  | chr1:44168802       | ST3GAL3:miR-369-3p          | ST3GAL3:miR-369-3p |
| rs1859726  | chr1:44168802       | ST3GAL3:miR-369-3p          | ST3GAL3:miR-655    |
| rs41292517 | chr1:51593176       | EPS15:miR-130/301           | EPS15:miR-527      |
| rs41292517 | chr1:51593176       | EPS15:miR-148/152           | EPS15:miR-527      |
| rs41292517 | chr1:51593176       | EPS15:miR-19                | EPS15:miR-527      |
| rs4628     | chr1:56734344       | PPAP2B:miR-224              | PPAP2B:miR-610     |
| rs1052426  | chr1:62401675       | INADL:miR-18                | INADL:miR-18a      |
| rs1052426  | chr1:62401675       | INADL:miR-18                | INADL:miR-18b      |

Supplemental Table 5: Consensus SNPs in miRNA target sites

| SNP ID     | SNP Position (hg18) | TargetScanS Prediction         | PITA Prediction  |
|------------|---------------------|--------------------------------|------------------|
| rs62620019 | chr1:62689369       | USP1:miR-410                   | USP1:miR-568     |
| rs1050619  | chr1:91921599       | TGFBR3:miR-23                  | TGFBR3:miR-23a   |
| rs1050619  | chr1:91921599       | TGFBR3:miR-23                  | TGFBR3:miR-23b   |
| rs1050619  | chr1:91921599       | TGFBR3:miR-323                 | TGFBR3:miR-23a   |
| rs1050619  | chr1:91921599       | TGFBR3:miR-323                 | TGFBR3:miR-23b   |
| rs3789699  | chr1:95135589       | CNN3:miR-153                   | CNN3:miR-519a    |
| rs3789699  | chr1:95135589       | CNN3:miR-153                   | CNN3:miR-519b    |
| rs3789699  | chr1:95135589       | CNN3:miR-153                   | CNN3:miR-519c    |
| rs41285716 | chr1:99545479       | LPPR4:miR-96:1                 | LPPR4:miR-571    |
| rs34327534 | chr1:99546976       | LPPR4:miR-491                  | LPPR4:miR-491    |
| rs5876     | chr1:100320582      | HIAT1:miR-31                   | HIAT1:miR-539    |
| rs1056840  | chr1:101479198      | EDG1:miR-17-5p/20/93/106/519.d | EDG1:miR-106a    |
| rs1056840  | chr1:101479198      | EDG1:miR-17-5p/20/93/106/519.d | EDG1:miR-106b    |
| rs1056840  | chr1:101479198      | EDG1:miR-17-5p/20/93/106/519.d | EDG1:miR-17-5p   |
| rs1056840  | chr1:101479198      | EDG1:miR-17-5p/20/93/106/519.d | EDG1:miR-20a     |
| rs1056840  | chr1:101479198      | EDG1:miR-17-5p/20/93/106/519.d | EDG1:miR-20b     |
| rs1056840  | chr1:101479198      | EDG1:miR-17-5p/20/93/106/519.d | EDG1:miR-519d    |
| rs17019191 | chr1:107825738      | NTNG1:miR-182                  | NTNG1:miR-182    |
| rs17019191 | chr1:107825738      | NTNG1:miR-182                  | NTNG1:miR-369-3p |
| rs56714545 | chr1:112864937      | WNT2B:miR-130/301              | WNT2B:miR-130a   |
| rs56714545 | chr1:112864937      | WNT2B:miR-130/301              | WNT2B:miR-130b   |
| rs56714545 | chr1:112864937      | WNT2B:miR-130/301              | WNT2B:miR-301    |
| rs56714545 | chr1:112864937      | WNT2B:miR-130/301              | WNT2B:miR-454-3p |
| rs1059479  | chr1:113045415      | RHOC:miR-138                   | RHOC:miR-106a    |
| rs1059479  | chr1:113045415      | RHOC:miR-138                   | RHOC:miR-106b    |
| rs1059479  | chr1:113045415      | RHOC:miR-138                   | RHOC:miR-138     |
| rs1059479  | chr1:113045415      | RHOC:miR-138                   | RHOC:miR-17-5p   |
| rs1059479  | chr1:113045415      | RHOC:miR-138                   | RHOC:miR-20a     |
| rs1059479  | chr1:113045415      | RHOC:miR-138                   | RHOC:miR-20b     |
| rs1059479  | chr1:113045415      | RHOC:miR-138                   | RHOC:miR-372     |
| rs1059479  | chr1:113045415      | RHOC:miR-138                   | RHOC:miR-93      |
| rs1059479  | chr1:113045415      | RHOC:miR-142-5p                | RHOC:miR-106a    |
| rs1059479  | chr1:113045415      | RHOC:miR-142-5p                | RHOC:miR-106b    |
| rs1059479  | chr1:113045415      | RHOC:miR-142-5p                | RHOC:miR-138     |
| rs1059479  | chr1:113045415      | RHOC:miR-142-5p                | RHOC:miR-17-5p   |
| rs1059479  | chr1:113045415      | RHOC:miR-142-5p                | RHOC:miR-20a     |
| rs1059479  | chr1:113045415      | RHOC:miR-142-5p                | RHOC:miR-20b     |

Supplemental Table 5: Consensus SNPs in miRNA target sites

| SNP ID     | SNP Position (hg18) | TargetScanS Prediction                     | PITA Prediction |
|------------|---------------------|--------------------------------------------|-----------------|
| rs1059479  | chr1:113045415      | RHOC:miR-142-5p                            | RHOC:miR-372    |
| rs1059479  | chr1:113045415      | RHOC:miR-142-5p                            | RHOC:miR-93     |
| rs1059479  | chr1:113045415      | RHOC:miR-17-5p/20/93/106/519.d             | RHOC:miR-106a   |
| rs1059479  | chr1:113045415      | RHOC:miR-17-5p/20/93/106/519.d             | RHOC:miR-106b   |
| rs1059479  | chr1:113045415      | RHOC:miR-17-5p/20/93/106/519.d             | RHOC:miR-138    |
| rs1059479  | chr1:113045415      | RHOC:miR-17-5p/20/93/106/519.d             | RHOC:miR-17-5p  |
| rs1059479  | chr1:113045415      | RHOC:miR-17-5p/20/93/106/519.d             | RHOC:miR-20a    |
| rs1059479  | chr1:113045415      | RHOC:miR-17-5p/20/93/106/519.d             | RHOC:miR-20b    |
| rs1059479  | chr1:113045415      | RHOC:miR-17-5p/20/93/106/519.d             | RHOC:miR-372    |
| rs1059479  | chr1:113045415      | RHOC:miR-17-5p/20/93/106/519.d             | RHOC:miR-93     |
| rs1059479  | chr1:113045415      | RHOC:miR-93/291-3p/294/295/302/372/373/520 | RHOC:miR-106a   |
| rs1059479  | chr1:113045415      | RHOC:miR-93/291-3p/294/295/302/372/373/520 | RHOC:miR-106b   |
| rs1059479  | chr1:113045415      | RHOC:miR-93/291-3p/294/295/302/372/373/520 | RHOC:miR-138    |
| rs1059479  | chr1:113045415      | RHOC:miR-93/291-3p/294/295/302/372/373/520 | RHOC:miR-17-5p  |
| rs1059479  | chr1:113045415      | RHOC:miR-93/291-3p/294/295/302/372/373/520 | RHOC:miR-20a    |
| rs1059479  | chr1:113045415      | RHOC:miR-93/291-3p/294/295/302/372/373/520 | RHOC:miR-20b    |
| rs1059479  | chr1:113045415      | RHOC:miR-93/291-3p/294/295/302/372/373/520 | RHOC:miR-372    |
| rs1059479  | chr1:113045415      | RHOC:miR-93/291-3p/294/295/302/372/373/520 | RHOC:miR-93     |
| rs34764866 | chr1:114319284      | HIPK1:miR-124.1:1                          | HIPK1:miR-124a  |
| rs34764866 | chr1:114319284      | HIPK1:miR-124.1:1                          | HIPK1:miR-524   |
| rs34764866 | chr1:114319284      | HIPK1:miR-124.1:1                          | HIPK1:miR-525*  |
| rs34764866 | chr1:114319284      | HIPK1:miR-124.2/506:1                      | HIPK1:miR-124a  |
| rs34764866 | chr1:114319284      | HIPK1:miR-124.2/506:1                      | HIPK1:miR-524   |
| rs34764866 | chr1:114319284      | HIPK1:miR-124.2/506:1                      | HIPK1:miR-525*  |
| rs1802719  | chr1:149306711      | MLLT11:miR-29                              | MLLT11:miR-29a  |
| rs1802719  | chr1:149306711      | MLLT11:miR-29                              | MLLT11:miR-29b  |
| rs1802719  | chr1:149306711      | MLLT11:miR-29                              | MLLT11:miR-29c  |
| rs12904    | chr1:153373321      | EFNA1:miR-200bc/429                        | EFNA1:miR-193b  |
| rs11556953 | chr1:158154993      | TAGLN2:miR-133:1                           | TAGLN2:miR-659  |
| rs36076633 | chr1:158155137      | TAGLN2:miR-1/206                           | TAGLN2:miR-613  |
| rs2854245  | chr1:158379963      | ATP1A2:miR-26                              | ATP1A2:miR-519a |
| rs2854245  | chr1:158379963      | ATP1A2:miR-26                              | ATP1A2:miR-519b |
| rs2854245  | chr1:158379963      | ATP1A2:miR-26                              | ATP1A2:miR-519c |
| rs5778164  | chr1:158661910      | VANGL2:miR-26                              | VANGL2:miR-26a  |
| rs5778164  | chr1:158661910      | VANGL2:miR-26                              | VANGL2:miR-26b  |
| rs12091844 | chr1:167699897      | SLC19A2:miR-101                            | SLC19A2:miR-144 |
| rs1053045  | chr1:174180638      | RFWD2:miR-186                              | RFWD2:miR-186   |

Supplemental Table 5: Consensus SNPs in miRNA target sites

| SNP ID     | SNP Position (hg18) | TargetScanS Prediction                         | PITA Prediction  |
|------------|---------------------|------------------------------------------------|------------------|
| rs41268464 | chr1:179326516      | IER5:miR-200bc/429                             | IER5:miR-429     |
| rs41268464 | chr1:179326516      | IER5:miR-200bc/429                             | IER5:miR-568     |
| rs41272542 | chr1:181788123      | SMG7:miR-181                                   | SMG7:miR-221     |
| rs56736495 | chr1:184425750      | HMCN1:miR-29                                   | HMCN1:miR-29a    |
| rs56736495 | chr1:184425750      | HMCN1:miR-29                                   | HMCN1:miR-29b    |
| rs56736495 | chr1:184425750      | HMCN1:miR-29                                   | HMCN1:miR-29c    |
| rs34333849 | chr1:191047947      | RGS2:miR-182                                   | RGS2:miR-96      |
| rs34333849 | chr1:191047947      | RGS2:miR-96                                    | RGS2:miR-96      |
| rs11313660 | chr1:195393671      | ZBTB41:miR-17-5p/20/93/106/519.d               | ZBTB41:miR-106a  |
| rs11313660 | chr1:195393671      | ZBTB41:miR-17-5p/20/93/106/519.d               | ZBTB41:miR-106b  |
| rs11313660 | chr1:195393671      | ZBTB41:miR-17-5p/20/93/106/519.d               | ZBTB41:miR-17-5p |
| rs11313660 | chr1:195393671      | ZBTB41:miR-17-5p/20/93/106/519.d               | ZBTB41:miR-20a   |
| rs11313660 | chr1:195393671      | ZBTB41:miR-17-5p/20/93/106/519.d               | ZBTB41:miR-20b   |
| rs11313660 | chr1:195393671      | ZBTB41:miR-17-5p/20/93/106/519.d               | ZBTB41:miR-302a  |
| rs11313660 | chr1:195393671      | ZBTB41:miR-17-5p/20/93/106/519.d               | ZBTB41:miR-302b  |
| rs11313660 | chr1:195393671      | ZBTB41:miR-17-5p/20/93/106/519.d               | ZBTB41:miR-302c  |
| rs11313660 | chr1:195393671      | ZBTB41:miR-17-5p/20/93/106/519.d               | ZBTB41:miR-302d  |
| rs11313660 | chr1:195393671      | ZBTB41:miR-17-5p/20/93/106/519.d               | ZBTB41:miR-373   |
| rs11313660 | chr1:195393671      | ZBTB41:miR-17-5p/20/93/106/519.d               | ZBTB41:miR-520a  |
| rs11313660 | chr1:195393671      | ZBTB41:miR-17-5p/20/93/106/519.d               | ZBTB41:miR-520b  |
| rs11313660 | chr1:195393671      | ZBTB41:miR-17-5p/20/93/106/519.d               | ZBTB41:miR-520c  |
| rs11313660 | chr1:195393671      | ZBTB41:miR-17-5p/20/93/106/519.d               | ZBTB41:miR-520d  |
| rs11313660 | chr1:195393671      | ZBTB41:miR-17-5p/20/93/106/519.d               | ZBTB41:miR-520e  |
| rs11313660 | chr1:195393671      | ZBTB41:miR-17-5p/20/93/106/519.d               | ZBTB41:miR-526b* |
| rs11313660 | chr1:195393671      | ZBTB41:miR-93/291-3p/294/295/302/372/373/520:1 | ZBTB41:miR-106a  |
| rs11313660 | chr1:195393671      | ZBTB41:miR-93/291-3p/294/295/302/372/373/520:1 | ZBTB41:miR-106b  |
| rs11313660 | chr1:195393671      | ZBTB41:miR-93/291-3p/294/295/302/372/373/520:1 | ZBTB41:miR-17-5p |
| rs11313660 | chr1:195393671      | ZBTB41:miR-93/291-3p/294/295/302/372/373/520:1 | ZBTB41:miR-20a   |
| rs11313660 | chr1:195393671      | ZBTB41:miR-93/291-3p/294/295/302/372/373/520:1 | ZBTB41:miR-20b   |
| rs11313660 | chr1:195393671      | ZBTB41:miR-93/291-3p/294/295/302/372/373/520:1 | ZBTB41:miR-302a  |
| rs11313660 | chr1:195393671      | ZBTB41:miR-93/291-3p/294/295/302/372/373/520:1 | ZBTB41:miR-302b  |
| rs11313660 | chr1:195393671      | ZBTB41:miR-93/291-3p/294/295/302/372/373/520:1 | ZBTB41:miR-302c  |
| rs11313660 | chr1:195393671      | ZBTB41:miR-93/291-3p/294/295/302/372/373/520:1 | ZBTB41:miR-302d  |
| rs11313660 | chr1:195393671      | ZBTB41:miR-93/291-3p/294/295/302/372/373/520:1 | ZBTB41:miR-373   |
| rs11313660 | chr1:195393671      | ZBTB41:miR-93/291-3p/294/295/302/372/373/520:1 | ZBTB41:miR-520a  |
| rs11313660 | chr1:195393671      | ZBTB41:miR-93/291-3p/294/295/302/372/373/520:1 | ZBTB41:miR-520b  |
| rs11313660 | chr1:195393671      | ZBTB41:miR-93/291-3p/294/295/302/372/373/520:1 | ZBTB41:miR-520c  |

**Supplemental Table 5: Consensus SNPs in miRNA target sites**

| <b>SNP ID</b> | <b>SNP Position (hg18)</b> | <b>TargetScanS Prediction</b>                  | <b>PITA Prediction</b> |
|---------------|----------------------------|------------------------------------------------|------------------------|
| rs11313660    | chr1:195393671             | ZBTB41:miR-93/291-3p/294/295/302/372/373/520:1 | ZBTB41:miR-520d        |
| rs11313660    | chr1:195393671             | ZBTB41:miR-93/291-3p/294/295/302/372/373/520:1 | ZBTB41:miR-520e        |
| rs11313660    | chr1:195393671             | ZBTB41:miR-93/291-3p/294/295/302/372/373/520:1 | ZBTB41:miR-526b*       |
| rs11542634    | chr1:200118729             | IPO9:miR-503                                   | IPO9:miR-503           |
| rs1804734     | chr1:201545229             | BTG2:miR-21                                    | BTG2:miR-600           |
| rs35434297    | chr1:201578020             | FMOD:miR-338                                   | FMOD:miR-545           |
| rs36012144    | chr1:202363486             | SOX13:miR-203.1                                | SOX13:miR-573          |
| rs11588647    | chr1:213475956             | KCNK2:miR-200bc/429                            | KCNK2:miR-105          |
| rs11588647    | chr1:213475956             | KCNK2:miR-200bc/429                            | KCNK2:miR-200b         |
| rs11588647    | chr1:213475956             | KCNK2:miR-200bc/429                            | KCNK2:miR-200c         |
| rs11588647    | chr1:213475956             | KCNK2:miR-200bc/429                            | KCNK2:miR-429          |
| rs1141262     | chr1:214746054             | ESRRG:miR-7                                    | ESRRG:miR-7            |
| rs34140107    | chr1:219941461             | DUSP10:miR-129-5p                              | DUSP10:miR-129         |
| rs34140107    | chr1:219941461             | DUSP10:miR-129-5p                              | DUSP10:miR-450         |
| rs34140107    | chr1:219941461             | DUSP10:miR-450                                 | DUSP10:miR-129         |
| rs34140107    | chr1:219941461             | DUSP10:miR-450                                 | DUSP10:miR-450         |
| rs13404748    | chr2:16597634              | FAM49A:miR-30-5p                               | FAM49A:miR-30a-5p      |
| rs13404748    | chr2:16597634              | FAM49A:miR-30-5p                               | FAM49A:miR-30b         |
| rs13404748    | chr2:16597634              | FAM49A:miR-30-5p                               | FAM49A:miR-30c         |
| rs13404748    | chr2:16597634              | FAM49A:miR-30-5p                               | FAM49A:miR-30d         |
| rs13404748    | chr2:16597634              | FAM49A:miR-30-5p                               | FAM49A:miR-30e-5p      |
| rs17737058    | chr2:24845073              | NCOA1:miR-488                                  | NCOA1:miR-488          |
| rs35163679    | chr2:25309938              | DNMT3A:miR-200bc/429                           | DNMT3A:miR-429         |
| rs62128674    | chr2:26465969              | SELI:miR-182                                   | SELI:miR-182           |
| rs3087895     | chr2:30235457              | YPEL5:miR-30-5p                                | YPEL5:miR-30a-5p       |
| rs3087895     | chr2:30235457              | YPEL5:miR-30-5p                                | YPEL5:miR-30b          |
| rs3087895     | chr2:30235457              | YPEL5:miR-30-5p                                | YPEL5:miR-30c          |
| rs3087895     | chr2:30235457              | YPEL5:miR-30-5p                                | YPEL5:miR-30d          |
| rs3087895     | chr2:30235457              | YPEL5:miR-30-5p                                | YPEL5:miR-30e-5p       |
| rs11550290    | chr2:36630373              | CRIM1:miR-18                                   | CRIM1:miR-421          |
| rs11550290    | chr2:36630373              | CRIM1:miR-18                                   | CRIM1:miR-545          |
| rs34098574    | chr2:46664267              | RHOQ:miR-9                                     | RHOQ:miR-9             |
| rs1803209     | chr2:47241073              | CALM2:miR-505                                  | CALM2:miR-302b*        |
| rs7573286     | chr2:55053268              | RTN4:miR-182                                   | RTN4:miR-182           |
| rs2287086     | chr2:60539999              | BCL11A:miR-363:1                               | BCL11A:miR-32          |
| rs2287086     | chr2:60539999              | BCL11A:miR-363:1                               | BCL11A:miR-323         |
| rs2287086     | chr2:60539999              | BCL11A:miR-363:1                               | BCL11A:miR-557         |

Supplemental Table 5: Consensus SNPs in miRNA target sites

| SNP ID     | SNP Position (hg18) | TargetScanS Prediction            | PITA Prediction     |
|------------|---------------------|-----------------------------------|---------------------|
| rs1050608  | chr2:61558609       | XPO1:miR-142-3p                   | XPO1:miR-142-3p     |
| rs12613621 | chr2:63137026       | OTX1:miR-103/107                  | OTX1:miR-503        |
| rs12613621 | chr2:63137026       | OTX1:miR-15/16/195/424/497:2      | OTX1:miR-503        |
| rs35261794 | chr2:69554435       | AAK1:miR-205:1                    | AAK1:miR-205        |
| rs61296228 | chr2:70528078       | TGFA:miR-23                       | TGFA:miR-23a        |
| rs61296228 | chr2:70528078       | TGFA:miR-23                       | TGFA:miR-23b        |
| rs61296228 | chr2:70528078       | TGFA:miR-23                       | TGFA:miR-655        |
| rs61296228 | chr2:70528078       | TGFA:miR-323                      | TGFA:miR-23a        |
| rs61296228 | chr2:70528078       | TGFA:miR-323                      | TGFA:miR-23b        |
| rs61296228 | chr2:70528078       | TGFA:miR-323                      | TGFA:miR-655        |
| rs1046157  | chr2:73154050       | RAB11FIP5:miR-142-5p              | RAB11FIP5:miR-106a  |
| rs1046157  | chr2:73154050       | RAB11FIP5:miR-142-5p              | RAB11FIP5:miR-106b  |
| rs1046157  | chr2:73154050       | RAB11FIP5:miR-142-5p              | RAB11FIP5:miR-17-5p |
| rs1046157  | chr2:73154050       | RAB11FIP5:miR-142-5p              | RAB11FIP5:miR-20a   |
| rs1046157  | chr2:73154050       | RAB11FIP5:miR-142-5p              | RAB11FIP5:miR-20b   |
| rs1046157  | chr2:73154050       | RAB11FIP5:miR-142-5p              | RAB11FIP5:miR-302a  |
| rs1046157  | chr2:73154050       | RAB11FIP5:miR-142-5p              | RAB11FIP5:miR-302b  |
| rs1046157  | chr2:73154050       | RAB11FIP5:miR-142-5p              | RAB11FIP5:miR-302c  |
| rs1046157  | chr2:73154050       | RAB11FIP5:miR-142-5p              | RAB11FIP5:miR-302d  |
| rs1046157  | chr2:73154050       | RAB11FIP5:miR-142-5p              | RAB11FIP5:miR-373   |
| rs1046157  | chr2:73154050       | RAB11FIP5:miR-142-5p              | RAB11FIP5:miR-520a  |
| rs1046157  | chr2:73154050       | RAB11FIP5:miR-142-5p              | RAB11FIP5:miR-520b  |
| rs1046157  | chr2:73154050       | RAB11FIP5:miR-142-5p              | RAB11FIP5:miR-520c  |
| rs1046157  | chr2:73154050       | RAB11FIP5:miR-142-5p              | RAB11FIP5:miR-520d  |
| rs1046157  | chr2:73154050       | RAB11FIP5:miR-142-5p              | RAB11FIP5:miR-520e  |
| rs1046157  | chr2:73154050       | RAB11FIP5:miR-142-5p              | RAB11FIP5:miR-526b* |
| rs3739008  | chr2:100979000      | NPAS2:miR-17-5p/20/93/106/519.d:1 | NPAS2:miR-106a      |
| rs3739008  | chr2:100979000      | NPAS2:miR-17-5p/20/93/106/519.d:1 | NPAS2:miR-106b      |
| rs3739008  | chr2:100979000      | NPAS2:miR-17-5p/20/93/106/519.d:1 | NPAS2:miR-17-5p     |
| rs3739008  | chr2:100979000      | NPAS2:miR-17-5p/20/93/106/519.d:1 | NPAS2:miR-20a       |
| rs3739008  | chr2:100979000      | NPAS2:miR-17-5p/20/93/106/519.d:1 | NPAS2:miR-20b       |
| rs3739008  | chr2:100979000      | NPAS2:miR-17-5p/20/93/106/519.d:1 | NPAS2:miR-302a      |
| rs3739008  | chr2:100979000      | NPAS2:miR-17-5p/20/93/106/519.d:1 | NPAS2:miR-302b      |
| rs3739008  | chr2:100979000      | NPAS2:miR-17-5p/20/93/106/519.d:1 | NPAS2:miR-302c      |
| rs3739008  | chr2:100979000      | NPAS2:miR-17-5p/20/93/106/519.d:1 | NPAS2:miR-302d      |
| rs3739008  | chr2:100979000      | NPAS2:miR-17-5p/20/93/106/519.d:1 | NPAS2:miR-373       |
| rs3739008  | chr2:100979000      | NPAS2:miR-17-5p/20/93/106/519.d:1 | NPAS2:miR-519d      |



Supplemental Table 5: Consensus SNPs in miRNA target sites

| SNP ID     | SNP Position (hg18) | TargetScanS Prediction            | PITA Prediction    |
|------------|---------------------|-----------------------------------|--------------------|
| rs3739008  | chr2:100979000      | NPAS2:miR-17-5p/20/93/106/519.d:1 | NPAS2:miR-519e     |
| rs3739008  | chr2:100979000      | NPAS2:miR-17-5p/20/93/106/519.d:1 | NPAS2:miR-520a     |
| rs3739008  | chr2:100979000      | NPAS2:miR-17-5p/20/93/106/519.d:1 | NPAS2:miR-520b     |
| rs3739008  | chr2:100979000      | NPAS2:miR-17-5p/20/93/106/519.d:1 | NPAS2:miR-520c     |
| rs3739008  | chr2:100979000      | NPAS2:miR-17-5p/20/93/106/519.d:1 | NPAS2:miR-520d     |
| rs3739008  | chr2:100979000      | NPAS2:miR-17-5p/20/93/106/519.d:1 | NPAS2:miR-520e     |
| rs3739008  | chr2:100979000      | NPAS2:miR-17-5p/20/93/106/519.d:1 | NPAS2:miR-526b*    |
| rs11553853 | chr2:105877068      | NCK2:miR-1/206                    | NCK2:miR-122a      |
| rs11553853 | chr2:105877068      | NCK2:miR-1/206                    | NCK2:miR-340       |
| rs11553853 | chr2:105877068      | NCK2:miR-455                      | NCK2:miR-122a      |
| rs11553853 | chr2:105877068      | NCK2:miR-455                      | NCK2:miR-340       |
| rs1801602  | chr2:106076797      | UXS1:miR-145                      | UXS1:miR-145       |
| rs34871350 | chr2:113137493      | SLC20A1:miR-339                   | SLC20A1:miR-210    |
| rs1053679  | chr2:139043384      | LOC339745:miR-124.2/506:1         | LOC339745:miR-124a |
| rs62169203 | chr2:144862630      | ZEB2:miR-25/32/92/363/367         | ZFHX1B:miR-32      |
| rs62169203 | chr2:144862630      | ZEB2:miR-25/32/92/363/367         | ZFHX1B:miR-363     |
| rs11291336 | chr2:152403264      | CACNB4:miR-129-5p                 | CACNB4:miR-96      |
| rs11291336 | chr2:152403264      | CACNB4:miR-182                    | CACNB4:miR-96      |
| rs11291336 | chr2:152403264      | CACNB4:miR-96                     | CACNB4:miR-96      |
| rs5024424  | chr2:165956317      | SCN2A:miR-101                     | SCN2A2:miR-101     |
| rs35272219 | chr2:173625469      | RAPGEF4:miR-203.1                 | RAPGEF4:miR-203    |
| rs35272219 | chr2:173625469      | RAPGEF4:miR-203.1                 | RAPGEF4:miR-613    |
| rs2304340  | chr2:178968628      | OSBPL6:miR-30-3p                  | OSBPL6:miR-380-5p  |
| rs2304340  | chr2:178968628      | OSBPL6:miR-30-3p                  | OSBPL6:miR-640     |
| rs12392    | chr2:198059774      | HSPD1:miR-1/206                   | HSPD1:miR-1        |
| rs12392    | chr2:198059774      | HSPD1:miR-1/206                   | HSPD1:miR-206      |
| rs12392    | chr2:198059774      | HSPD1:miR-1/206                   | HSPD1:miR-425-3p   |
| rs55884229 | chr2:201396295      | BZW1:miR-24                       | BZW1:miR-659       |
| rs17387557 | chr2:206369947      | NRP2:miR-141/200a                 | NRP2:miR-141       |
| rs17387557 | chr2:206369947      | NRP2:miR-141/200a                 | NRP2:miR-200a      |
| rs17387557 | chr2:206369947      | NRP2:miR-141/200a                 | NRP2:miR-429       |
| rs35564745 | chr2:208336085      | FZD5:miR-24                       | FZD5:miR-24        |
| rs35564745 | chr2:208336085      | FZD5:miR-24                       | FZD5:miR-579       |
| rs35564745 | chr2:208336085      | FZD5:miR-24                       | FZD5:miR-659       |
| rs55977831 | chr2:217249624      | IGFBP5:miR-143                    | IGFBP5:miR-143     |
| rs3204750  | chr2:218919561      | PNKD:let-7/98                     | PNKD:let-7a        |
| rs3204750  | chr2:218919561      | PNKD:let-7/98                     | PNKD:let-7b        |

Supplemental Table 5: Consensus SNPs in miRNA target sites

| SNP ID     | SNP Position (hg18) | TargetScanS Prediction         | PITA Prediction  |
|------------|---------------------|--------------------------------|------------------|
| rs3204750  | chr2:218919561      | PNKD:let-7/98                  | PNKD:let-7c      |
| rs3204750  | chr2:218919561      | PNKD:let-7/98                  | PNKD:let-7d      |
| rs3204750  | chr2:218919561      | PNKD:let-7/98                  | PNKD:let-7f      |
| rs3204750  | chr2:218919561      | PNKD:let-7/98                  | PNKD:let-7g      |
| rs3204750  | chr2:218919561      | PNKD:let-7/98                  | PNKD:let-7i      |
| rs3204750  | chr2:218919561      | PNKD:let-7/98                  | PNKD:miR-98      |
| rs13385757 | chr2:221993236      | EPHA4:miR-138                  | EPHA4:miR-138    |
| rs60365791 | chr2:232381635      | COPS7B:miR-486                 | COPS7B:miR-568   |
| rs2230360  | chr2:241817653      | HDLBP:miR-214                  | HDLBP:miR-214    |
| rs34717483 | chr3:3863718        | LRRN1:miR-369-3p               | LRRN1:miR-802    |
| rs34717483 | chr3:3863718        | LRRN1:miR-374                  | LRRN1:miR-802    |
| rs35018130 | chr3:4863676        | ITPR1:miR-204/211              | ITPR1:miR-204    |
| rs35018130 | chr3:4863676        | ITPR1:miR-204/211              | ITPR1:miR-211    |
| rs3840229  | chr3:7757488        | GRM7:miR-19                    | GRM7:miR-527     |
| rs56173829 | chr3:7757494        | GRM7:miR-130/301               | GRM7:miR-18a     |
| rs56173829 | chr3:7757494        | GRM7:miR-130/301               | GRM7:miR-18b     |
| rs56173829 | chr3:7757494        | GRM7:miR-130/301               | GRM7:miR-520g    |
| rs56173829 | chr3:7757494        | GRM7:miR-130/301               | GRM7:miR-520h    |
| rs56173829 | chr3:7757494        | GRM7:miR-130/301               | GRM7:miR-527     |
| rs56173829 | chr3:7757494        | GRM7:miR-17-5p/20/93/106/519.d | GRM7:miR-18a     |
| rs56173829 | chr3:7757494        | GRM7:miR-17-5p/20/93/106/519.d | GRM7:miR-18b     |
| rs56173829 | chr3:7757494        | GRM7:miR-17-5p/20/93/106/519.d | GRM7:miR-520g    |
| rs56173829 | chr3:7757494        | GRM7:miR-17-5p/20/93/106/519.d | GRM7:miR-520h    |
| rs56173829 | chr3:7757494        | GRM7:miR-17-5p/20/93/106/519.d | GRM7:miR-527     |
| rs56173829 | chr3:7757494        | GRM7:miR-19                    | GRM7:miR-18a     |
| rs56173829 | chr3:7757494        | GRM7:miR-19                    | GRM7:miR-18b     |
| rs56173829 | chr3:7757494        | GRM7:miR-19                    | GRM7:miR-520g    |
| rs56173829 | chr3:7757494        | GRM7:miR-19                    | GRM7:miR-520h    |
| rs56173829 | chr3:7757494        | GRM7:miR-19                    | GRM7:miR-527     |
| rs13085756 | chr3:9494746        | SETD5:miR-30-5p:2              | SETD5:miR-136    |
| rs13085756 | chr3:9494746        | SETD5:miR-30-5p:2              | SETD5:miR-30a-5p |
| rs13085756 | chr3:9494746        | SETD5:miR-30-5p:2              | SETD5:miR-30b    |
| rs13085756 | chr3:9494746        | SETD5:miR-30-5p:2              | SETD5:miR-30c    |
| rs13085756 | chr3:9494746        | SETD5:miR-30-5p:2              | SETD5:miR-30d    |
| rs13085756 | chr3:9494746        | SETD5:miR-30-5p:2              | SETD5:miR-30e-5p |
| rs13085758 | chr3:9494749        | SETD5:miR-30-5p:2              | SETD5:miR-30a-5p |
| rs13085758 | chr3:9494749        | SETD5:miR-30-5p:2              | SETD5:miR-30b    |

**Supplemental Table 5: Consensus SNPs in miRNA target sites**

| <b>SNP ID</b> | <b>SNP Position (hg18)</b> | <b>TargetScanS Prediction</b> | <b>PITA Prediction</b> |
|---------------|----------------------------|-------------------------------|------------------------|
| rs13085758    | chr3:9494749               | SETD5:miR-30-5p:2             | SETD5:miR-30c          |
| rs13085758    | chr3:9494749               | SETD5:miR-30-5p:2             | SETD5:miR-30d          |
| rs13085758    | chr3:9494749               | SETD5:miR-30-5p:2             | SETD5:miR-30e-5p       |
| rs35674       | chr3:10343577              | ATP2B2:miR-326                | ATP2B2:miR-326         |
| rs930541      | chr3:12200597              | SYN2:miR-335                  | SYN2:miR-28            |
| rs3202499     | chr3:13654776              | FBLN2:miR-128                 | FBLN2:miR-27a          |
| rs3202499     | chr3:13654776              | FBLN2:miR-128                 | FBLN2:miR-27b          |
| rs2731310     | chr3:14159096              | TMEM43:miR-194                | TMEM43:miR-132         |
| rs2731310     | chr3:14159096              | TMEM43:miR-194                | TMEM43:miR-212         |
| rs2731309     | chr3:14159097              | TMEM43:miR-194                | TMEM43:miR-132         |
| rs2731309     | chr3:14159097              | TMEM43:miR-194                | TMEM43:miR-212         |
| rs28509419    | chr3:25613194              | RARB:miR-15/16/195/424/497    | RARB:miR-503           |
| rs11305471    | chr3:30021347              | RBMS3:miR-320                 | RBMS3:miR-320          |
| rs10696791    | chr3:30021426              | RBMS3:miR-129-5p:1            | RBMS3:miR-129          |
| rs10696791    | chr3:30021426              | RBMS3:miR-363                 | RBMS3:miR-129          |
| rs10696791    | chr3:30021426              | RBMS3:miR-450                 | RBMS3:miR-129          |
| rs11322142    | chr3:30021431              | RBMS3:miR-129-5p:1            | RBMS3:miR-129          |
| rs11322142    | chr3:30021431              | RBMS3:miR-363                 | RBMS3:miR-129          |
| rs11322142    | chr3:30021431              | RBMS3:miR-450                 | RBMS3:miR-129          |
| rs17026326    | chr3:30708360              | TGFBR2:miR-130/301            | TGFBR2:miR-19a         |
| rs17026326    | chr3:30708360              | TGFBR2:miR-130/301            | TGFBR2:miR-19b         |
| rs17026326    | chr3:30708360              | TGFBR2:miR-19                 | TGFBR2:miR-19a         |
| rs17026326    | chr3:30708360              | TGFBR2:miR-19                 | TGFBR2:miR-19b         |
| rs35934901    | chr3:30708406              | TGFBR2:miR-410                | TGFBR2:miR-494         |
| rs35934901    | chr3:30708406              | TGFBR2:miR-410                | TGFBR2:miR-568         |
| rs35934901    | chr3:30708406              | TGFBR2:miR-410                | TGFBR2:miR-641         |
| rs45512996    | chr3:38565195              | SCN5A:let-7/98                | SCN5A:let-7e           |
| rs45589543    | chr3:38565380              | SCN5A:miR-153                 | SCN5A:miR-448          |
| rs45589543    | chr3:38565380              | SCN5A:miR-448                 | SCN5A:miR-448          |
| rs3731562     | chr3:48174881              | CDC25A:let-7/98               | CDC25A:let-7a          |
| rs3731562     | chr3:48174881              | CDC25A:let-7/98               | CDC25A:let-7b          |
| rs3731562     | chr3:48174881              | CDC25A:let-7/98               | CDC25A:let-7c          |
| rs3731562     | chr3:48174881              | CDC25A:let-7/98               | CDC25A:let-7d          |
| rs3731562     | chr3:48174881              | CDC25A:let-7/98               | CDC25A:let-7f          |
| rs3731562     | chr3:48174881              | CDC25A:let-7/98               | CDC25A:let-7g          |
| rs3731562     | chr3:48174881              | CDC25A:let-7/98               | CDC25A:let-7i          |
| rs3731562     | chr3:48174881              | CDC25A:let-7/98               | CDC25A:miR-196a        |

**Supplemental Table 5: Consensus SNPs in miRNA target sites**

| <b>SNP ID</b> | <b>SNP Position (hg18)</b> | <b>TargetScanS Prediction</b>              | <b>PITA Prediction</b> |
|---------------|----------------------------|--------------------------------------------|------------------------|
| rs3731562     | chr3:48174881              | CDC25A:let-7/98                            | CDC25A:miR-196b        |
| rs3731562     | chr3:48174881              | CDC25A:let-7/98                            | CDC25A:miR-98          |
| rs35841879    | chr3:49548014              | DAG1:miR-190                               | DAG1:miR-190           |
| rs11706794    | chr3:51396292              | DOCK3:miR-486                              | DOCK3:miR-19a          |
| rs11706794    | chr3:51396292              | DOCK3:miR-486                              | DOCK3:miR-19b          |
| rs11706794    | chr3:51396292              | DOCK3:miR-486                              | DOCK3:miR-568          |
| rs35336193    | chr3:53296462              | DCP1A:miR-128                              | DCP1A:miR-128a         |
| rs35336193    | chr3:53296462              | DCP1A:miR-128                              | DCP1A:miR-128b         |
| rs35336193    | chr3:53296462              | DCP1A:miR-128                              | DCP1A:miR-27a          |
| rs35336193    | chr3:53296462              | DCP1A:miR-128                              | DCP1A:miR-27b          |
| rs35336193    | chr3:53296462              | DCP1A:miR-128                              | DCP1A:miR-769-5p       |
| rs358077      | chr3:55083398              | CACNA2D3:miR-143                           | CACNA2D3:miR-433       |
| rs34585452    | chr3:64057869              | PRICKLE2:miR-33                            | PRICKLE2:miR-33        |
| rs34585452    | chr3:64057869              | PRICKLE2:miR-33                            | PRICKLE2:miR-33b       |
| rs36084453    | chr3:70099937              | MITF:miR-148/152:2                         | MITF:miR-148b          |
| rs36084453    | chr3:70099937              | MITF:miR-148/152:2                         | MITF:miR-152           |
| rs6551275     | chr3:88275113              | ZNF654:miR-153                             | ZNF654:miR-153         |
| rs1058732     | chr3:99998659              | DCBLD2:miR-24                              | DCBLD2:miR-24          |
| rs1058732     | chr3:99998659              | DCBLD2:miR-24                              | DCBLD2:miR-484         |
| rs1027704     | chr3:101951120             | ABI3BP:miR-181                             | ABI3BP:miR-181b        |
| rs1027704     | chr3:101951120             | ABI3BP:miR-181                             | ABI3BP:miR-181d        |
| rs4061093     | chr3:101951120             | ABI3BP:miR-181                             | ABI3BP:miR-181b        |
| rs4061093     | chr3:101951120             | ABI3BP:miR-181                             | ABI3BP:miR-181d        |
| rs7648784     | chr3:114921497             | NAT13:miR-21                               | MAK3:miR-590           |
| rs28399411    | chr3:116922800             | GAP43:miR-25/32/92/363/367                 | GAP43:miR-32           |
| rs28399411    | chr3:116922800             | GAP43:miR-25/32/92/363/367                 | GAP43:miR-363          |
| rs34709307    | chr3:124814466             | MYLK:miR-93/291-3p/294/295/302/372/373/520 | MYLK:miR-561           |
| rs35145256    | chr3:126433474             | ZNF148:miR-370                             | ZNF148:miR-370         |
| rs35145256    | chr3:126433474             | ZNF148:miR-370                             | ZNF148:miR-502         |
| rs11434122    | chr3:132203059             | ATP2C1:miR-153                             | ATP2C1:miR-153         |
| rs11434122    | chr3:132203059             | ATP2C1:miR-448                             | ATP2C1:miR-153         |
| rs3193182     | chr3:134597640             | TMEM108:miR-320                            | TMEM108:miR-320        |
| rs1131974     | chr3:135557624             | AMOTL2:miR-382                             | AMOTL2:miR-382         |
| rs1061262     | chr3:147269980             | PLOD2:miR-182                              | PLOD2:miR-96           |
| rs1061262     | chr3:147269980             | PLOD2:miR-96                               | PLOD2:miR-96           |
| rs35579941    | chr3:151744480             | SERP1:miR-122                              | SERP1:miR-122a         |
| rs13087746    | chr3:178224806             | TBL1XR1:miR-34/449                         | TBL1XR1:miR-142-3p     |

Supplemental Table 5: Consensus SNPs in miRNA target sites

| SNP ID     | SNP Position (hg18) | TargetScanS Prediction          | PITA Prediction    |
|------------|---------------------|---------------------------------|--------------------|
| rs13087746 | chr3:178224806      | TBL1XR1:miR-34/449              | TBL1XR1:miR-34a    |
| rs13087746 | chr3:178224806      | TBL1XR1:miR-34/449              | TBL1XR1:miR-34c    |
| rs13087746 | chr3:178224806      | TBL1XR1:miR-34/449              | TBL1XR1:miR-449    |
| rs13087746 | chr3:178224806      | TBL1XR1:miR-34/449              | TBL1XR1:miR-449b   |
| rs6769752  | chr3:180788540      | ACTL6A:miR-320                  | ACTL6A:miR-203     |
| rs1801035  | chr3:185384366      | AP2M1:miR-9                     | AP2M1:miR-9        |
| rs11546693 | chr3:185460132      | CAMK2N2:miR-485-5p:2            | CAMK2N2:miR-485-5p |
| rs63665263 | chr3:185590044      | CHRD:let-7/98                   | CHRD:let-7a        |
| rs63665263 | chr3:185590044      | CHRD:let-7/98                   | CHRD:let-7b        |
| rs63665263 | chr3:185590044      | CHRD:let-7/98                   | CHRD:let-7c        |
| rs63665263 | chr3:185590044      | CHRD:let-7/98                   | CHRD:let-7d        |
| rs63665263 | chr3:185590044      | CHRD:let-7/98                   | CHRD:let-7f        |
| rs63665263 | chr3:185590044      | CHRD:let-7/98                   | CHRD:let-7g        |
| rs63665263 | chr3:185590044      | CHRD:let-7/98                   | CHRD:let-7i        |
| rs63665263 | chr3:185590044      | CHRD:let-7/98                   | CHRD:miR-98        |
| rs63665263 | chr3:185590044      | CHRD:miR-196                    | CHRD:let-7a        |
| rs63665263 | chr3:185590044      | CHRD:miR-196                    | CHRD:let-7b        |
| rs63665263 | chr3:185590044      | CHRD:miR-196                    | CHRD:let-7c        |
| rs63665263 | chr3:185590044      | CHRD:miR-196                    | CHRD:let-7d        |
| rs63665263 | chr3:185590044      | CHRD:miR-196                    | CHRD:let-7f        |
| rs63665263 | chr3:185590044      | CHRD:miR-196                    | CHRD:let-7g        |
| rs63665263 | chr3:185590044      | CHRD:miR-196                    | CHRD:let-7i        |
| rs63665263 | chr3:185590044      | CHRD:miR-196                    | CHRD:miR-98        |
| rs7355810  | chr3:186845006      | IGF2BP2:miR-485-5p              | IGF2BP2:miR-485-5p |
| rs56220221 | chr3:187349460      | DGKG:miR-410                    | DGKG:miR-568       |
| rs28480687 | chr3:187349461      | DGKG:miR-410                    | DGKG:miR-568       |
| rs3206822  | chr3:187990259      | EIF4A2:miR-145                  | EIF4A2:miR-145     |
| rs11549294 | chr4:6935828        | KIAA0232:miR-128                | KIAA0232:miR-139   |
| rs11549294 | chr4:6935828        | KIAA0232:miR-128                | KIAA0232:miR-27a   |
| rs11549294 | chr4:6935828        | KIAA0232:miR-128                | KIAA0232:miR-27b   |
| rs11549294 | chr4:6935828        | KIAA0232:miR-485-3p             | KIAA0232:miR-139   |
| rs11549294 | chr4:6935828        | KIAA0232:miR-485-3p             | KIAA0232:miR-27a   |
| rs11549294 | chr4:6935828        | KIAA0232:miR-485-3p             | KIAA0232:miR-27b   |
| rs1802032  | chr4:9685225        | WDR1:miR-544                    | WDR1:miR-544       |
| rs58334461 | chr4:37289130       | RELL1:miR-17-5p/20/93/106/519.d | RELL1:miR-106a     |
| rs58334461 | chr4:37289130       | RELL1:miR-17-5p/20/93/106/519.d | RELL1:miR-106b     |
| rs58334461 | chr4:37289130       | RELL1:miR-17-5p/20/93/106/519.d | RELL1:miR-17-5p    |

Landes Bioscience.  
not distribute.

Supplemental Table 5: Consensus SNPs in miRNA target sites

| SNP ID     | SNP Position (hg18) | TargetScanS Prediction                      | PITA Prediction   |
|------------|---------------------|---------------------------------------------|-------------------|
| rs58334461 | chr4:37289130       | RELL1:miR-17-5p/20/93/106/519.d             | RELL1:miR-20a     |
| rs58334461 | chr4:37289130       | RELL1:miR-17-5p/20/93/106/519.d             | RELL1:miR-20b     |
| rs58334461 | chr4:37289130       | RELL1:miR-17-5p/20/93/106/519.d             | RELL1:miR-302a    |
| rs58334461 | chr4:37289130       | RELL1:miR-17-5p/20/93/106/519.d             | RELL1:miR-302b    |
| rs58334461 | chr4:37289130       | RELL1:miR-17-5p/20/93/106/519.d             | RELL1:miR-302c    |
| rs58334461 | chr4:37289130       | RELL1:miR-17-5p/20/93/106/519.d             | RELL1:miR-302d    |
| rs58334461 | chr4:37289130       | RELL1:miR-17-5p/20/93/106/519.d             | RELL1:miR-373     |
| rs58334461 | chr4:37289130       | RELL1:miR-17-5p/20/93/106/519.d             | RELL1:miR-520a    |
| rs58334461 | chr4:37289130       | RELL1:miR-17-5p/20/93/106/519.d             | RELL1:miR-520b    |
| rs58334461 | chr4:37289130       | RELL1:miR-17-5p/20/93/106/519.d             | RELL1:miR-520c    |
| rs58334461 | chr4:37289130       | RELL1:miR-17-5p/20/93/106/519.d             | RELL1:miR-520d    |
| rs58334461 | chr4:37289130       | RELL1:miR-17-5p/20/93/106/519.d             | RELL1:miR-520e    |
| rs58334461 | chr4:37289130       | RELL1:miR-17-5p/20/93/106/519.d             | RELL1:miR-526b*   |
| rs58334461 | chr4:37289130       | RELL1:miR-93/291-3p/294/295/302/372/373/520 | RELL1:miR-106a    |
| rs58334461 | chr4:37289130       | RELL1:miR-93/291-3p/294/295/302/372/373/520 | RELL1:miR-106b    |
| rs58334461 | chr4:37289130       | RELL1:miR-93/291-3p/294/295/302/372/373/520 | RELL1:miR-17-5p   |
| rs58334461 | chr4:37289130       | RELL1:miR-93/291-3p/294/295/302/372/373/520 | RELL1:miR-20a     |
| rs58334461 | chr4:37289130       | RELL1:miR-93/291-3p/294/295/302/372/373/520 | RELL1:miR-20b     |
| rs58334461 | chr4:37289130       | RELL1:miR-93/291-3p/294/295/302/372/373/520 | RELL1:miR-302a    |
| rs58334461 | chr4:37289130       | RELL1:miR-93/291-3p/294/295/302/372/373/520 | RELL1:miR-302b    |
| rs58334461 | chr4:37289130       | RELL1:miR-93/291-3p/294/295/302/372/373/520 | RELL1:miR-302c    |
| rs58334461 | chr4:37289130       | RELL1:miR-93/291-3p/294/295/302/372/373/520 | RELL1:miR-302d    |
| rs58334461 | chr4:37289130       | RELL1:miR-93/291-3p/294/295/302/372/373/520 | RELL1:miR-373     |
| rs58334461 | chr4:37289130       | RELL1:miR-93/291-3p/294/295/302/372/373/520 | RELL1:miR-520a    |
| rs58334461 | chr4:37289130       | RELL1:miR-93/291-3p/294/295/302/372/373/520 | RELL1:miR-520b    |
| rs58334461 | chr4:37289130       | RELL1:miR-93/291-3p/294/295/302/372/373/520 | RELL1:miR-520c    |
| rs58334461 | chr4:37289130       | RELL1:miR-93/291-3p/294/295/302/372/373/520 | RELL1:miR-520d    |
| rs58334461 | chr4:37289130       | RELL1:miR-93/291-3p/294/295/302/372/373/520 | RELL1:miR-520e    |
| rs58334461 | chr4:37289130       | RELL1:miR-93/291-3p/294/295/302/372/373/520 | RELL1:miR-526b*   |
| rs62307873 | chr4:39501052       | SCC-112:miR-329                             | PDS5A:miR-521     |
| rs7680422  | chr4:54856274       | PDGFRA:miR-33:1                             | PDGFRA:miR-33     |
| rs7680422  | chr4:54856274       | PDGFRA:miR-33:1                             | PDGFRA:miR-33b    |
| rs7680422  | chr4:54856274       | PDGFRA:miR-33:1                             | PDGFRA:miR-544    |
| rs35250360 | chr4:68862243       | YTHDC1:miR-145                              | YTHDC1:miR-145    |
| rs4403013  | chr4:72653320       | SLC4A4:miR-381                              | SLC4A4:miR-369-3p |
| rs4403013  | chr4:72653320       | SLC4A4:miR-381                              | SLC4A4:miR-374    |
| rs34921070 | chr4:72653321       | SLC4A4:miR-381                              | SLC4A4:miR-369-3p |

Supplemental Table 5: Consensus SNPs in miRNA target sites

| SNP ID     | SNP Position (hg18) | TargetScanS Prediction            | PITA Prediction   |
|------------|---------------------|-----------------------------------|-------------------|
| rs34921070 | chr4:72653321       | SLC4A4:miR-381                    | SLC4A4:miR-374    |
| rs4403014  | chr4:72653325       | SLC4A4:miR-381                    | SLC4A4:miR-369-3p |
| rs4403014  | chr4:72653325       | SLC4A4:miR-381                    | SLC4A4:miR-374    |
| rs41265675 | chr4:72653335       | SLC4A4:miR-23                     | SLC4A4:miR-23a    |
| rs41265675 | chr4:72653335       | SLC4A4:miR-23                     | SLC4A4:miR-23b    |
| rs41265675 | chr4:72653335       | SLC4A4:miR-323                    | SLC4A4:miR-23a    |
| rs41265675 | chr4:72653335       | SLC4A4:miR-323                    | SLC4A4:miR-23b    |
| rs34636402 | chr4:88280653       | AFF1:miR-369-3p:1                 | AFF1:miR-380-3p   |
| rs34636402 | chr4:88280653       | AFF1:miR-374:1                    | AFF1:miR-380-3p   |
| rs35907994 | chr4:88280669       | AFF1:miR-369-3p:4                 | AFF1:miR-380-3p   |
| rs35907994 | chr4:88280669       | AFF1:miR-374:4                    | AFF1:miR-380-3p   |
| rs35907994 | chr4:88280669       | AFF1:miR-410:2                    | AFF1:miR-380-3p   |
| rs56202513 | chr4:88280669       | AFF1:miR-369-3p:4                 | AFF1:miR-380-3p   |
| rs56202513 | chr4:88280669       | AFF1:miR-374:4                    | AFF1:miR-380-3p   |
| rs56202513 | chr4:88280669       | AFF1:miR-410:2                    | AFF1:miR-380-3p   |
| rs36011297 | chr4:100020327      | EIF4E:miR-330                     | EIF4E:miR-559     |
| rs4365796  | chr4:109189332      | LEF1:miR-363                      | LEF1:miR-557      |
| rs41300351 | chr4:129410761      | PGRMC2:miR-493-5p                 | PGRMC2:miR-493-5p |
| rs10970    | chr4:134331061      | PCDH10:miR-24                     | PCDH10:miR-24     |
| rs1058267  | chr4:134332052      | PCDH10:miR-23                     | PCDH10:miR-496    |
| rs17017380 | chr4:144362051      | USP38:miR-495                     | USP38:miR-802     |
| rs35984115 | chr4:146268771      | ABCE1:miR-29                      | ABCE1:miR-506     |
| rs36227325 | chr4:146276336      | OTUD4:miR-17-5p/20/93/106/519.d:3 | OTUD4:miR-106a    |
| rs36227325 | chr4:146276336      | OTUD4:miR-17-5p/20/93/106/519.d:3 | OTUD4:miR-106b    |
| rs36227325 | chr4:146276336      | OTUD4:miR-17-5p/20/93/106/519.d:3 | OTUD4:miR-17-5p   |
| rs36227325 | chr4:146276336      | OTUD4:miR-17-5p/20/93/106/519.d:3 | OTUD4:miR-20a     |
| rs36227325 | chr4:146276336      | OTUD4:miR-17-5p/20/93/106/519.d:3 | OTUD4:miR-20b     |
| rs36227325 | chr4:146276336      | OTUD4:miR-17-5p/20/93/106/519.d:3 | OTUD4:miR-302a    |
| rs36227325 | chr4:146276336      | OTUD4:miR-17-5p/20/93/106/519.d:3 | OTUD4:miR-302b    |
| rs36227325 | chr4:146276336      | OTUD4:miR-17-5p/20/93/106/519.d:3 | OTUD4:miR-302c    |
| rs36227325 | chr4:146276336      | OTUD4:miR-17-5p/20/93/106/519.d:3 | OTUD4:miR-302d    |
| rs36227325 | chr4:146276336      | OTUD4:miR-17-5p/20/93/106/519.d:3 | OTUD4:miR-373     |
| rs36227325 | chr4:146276336      | OTUD4:miR-17-5p/20/93/106/519.d:3 | OTUD4:miR-520a    |
| rs36227325 | chr4:146276336      | OTUD4:miR-17-5p/20/93/106/519.d:3 | OTUD4:miR-520b    |
| rs36227325 | chr4:146276336      | OTUD4:miR-17-5p/20/93/106/519.d:3 | OTUD4:miR-520c    |
| rs36227325 | chr4:146276336      | OTUD4:miR-17-5p/20/93/106/519.d:3 | OTUD4:miR-520d    |
| rs36227325 | chr4:146276336      | OTUD4:miR-17-5p/20/93/106/519.d:3 | OTUD4:miR-520e    |

**Supplemental Table 5: Consensus SNPs in miRNA target sites**

| <b>SNP ID</b> | <b>SNP Position (hg18)</b> | <b>TargetScanS Prediction</b>               | <b>PITA Prediction</b> |
|---------------|----------------------------|---------------------------------------------|------------------------|
| rs36227325    | chr4:146276336             | OTUD4:miR-17-5p/20/93/106/519.d:3           | OTUD4:miR-520g         |
| rs36227325    | chr4:146276336             | OTUD4:miR-17-5p/20/93/106/519.d:3           | OTUD4:miR-520h         |
| rs36227325    | chr4:146276336             | OTUD4:miR-17-5p/20/93/106/519.d:3           | OTUD4:miR-526b*        |
| rs36227325    | chr4:146276336             | OTUD4:miR-93/291-3p/294/295/302/372/373/520 | OTUD4:miR-106a         |
| rs36227325    | chr4:146276336             | OTUD4:miR-93/291-3p/294/295/302/372/373/520 | OTUD4:miR-106b         |
| rs36227325    | chr4:146276336             | OTUD4:miR-93/291-3p/294/295/302/372/373/520 | OTUD4:miR-17-5p        |
| rs36227325    | chr4:146276336             | OTUD4:miR-93/291-3p/294/295/302/372/373/520 | OTUD4:miR-20a          |
| rs36227325    | chr4:146276336             | OTUD4:miR-93/291-3p/294/295/302/372/373/520 | OTUD4:miR-20b          |
| rs36227325    | chr4:146276336             | OTUD4:miR-93/291-3p/294/295/302/372/373/520 | OTUD4:miR-302a         |
| rs36227325    | chr4:146276336             | OTUD4:miR-93/291-3p/294/295/302/372/373/520 | OTUD4:miR-302b         |
| rs36227325    | chr4:146276336             | OTUD4:miR-93/291-3p/294/295/302/372/373/520 | OTUD4:miR-302c         |
| rs36227325    | chr4:146276336             | OTUD4:miR-93/291-3p/294/295/302/372/373/520 | OTUD4:miR-302d         |
| rs36227325    | chr4:146276336             | OTUD4:miR-93/291-3p/294/295/302/372/373/520 | OTUD4:miR-373          |
| rs36227325    | chr4:146276336             | OTUD4:miR-93/291-3p/294/295/302/372/373/520 | OTUD4:miR-520a         |
| rs36227325    | chr4:146276336             | OTUD4:miR-93/291-3p/294/295/302/372/373/520 | OTUD4:miR-520b         |
| rs36227325    | chr4:146276336             | OTUD4:miR-93/291-3p/294/295/302/372/373/520 | OTUD4:miR-520c         |
| rs36227325    | chr4:146276336             | OTUD4:miR-93/291-3p/294/295/302/372/373/520 | OTUD4:miR-520d         |
| rs36227325    | chr4:146276336             | OTUD4:miR-93/291-3p/294/295/302/372/373/520 | OTUD4:miR-520e         |
| rs36227325    | chr4:146276336             | OTUD4:miR-93/291-3p/294/295/302/372/373/520 | OTUD4:miR-520g         |
| rs36227325    | chr4:146276336             | OTUD4:miR-93/291-3p/294/295/302/372/373/520 | OTUD4:miR-520h         |
| rs36227325    | chr4:146276336             | OTUD4:miR-93/291-3p/294/295/302/372/373/520 | OTUD4:miR-526b*        |
| rs1063615     | chr4:146276389             | OTUD4:miR-214                               | OTUD4:miR-607          |
| rs60709046    | chr4:149221545             | NR3C2:miR-19                                | NR3C2:miR-19a          |
| rs60709046    | chr4:149221545             | NR3C2:miR-19                                | NR3C2:miR-19b          |
| rs4399968     | chr4:153462774             | FBXW7:miR-338                               | FBXW7:miR-338          |
| rs4399968     | chr4:153462774             | FBXW7:miR-338                               | FBXW7:miR-593          |
| rs4399968     | chr4:153462774             | FBXW7:miR-338                               | FBXW7:miR-624          |
| rs17061725    | chr4:176791216             | GPM6A:miR-330                               | GPM6A:miR-330          |
| rs17061725    | chr4:176791216             | GPM6A:miR-330                               | GPM6A:miR-518b         |
| rs17061725    | chr4:176791216             | GPM6A:miR-330                               | GPM6A:miR-518c         |
| rs17061725    | chr4:176791216             | GPM6A:miR-330                               | GPM6A:miR-518d         |
| rs17061725    | chr4:176791216             | GPM6A:miR-330                               | GPM6A:miR-520d*        |
| rs11371540    | chr4:183960771             | ODZ3:miR-29                                 | ODZ3:miR-593           |
| rs11371540    | chr4:183960771             | ODZ3:miR-29                                 | ODZ3:miR-624           |
| rs11542347    | chr4:183960774             | ODZ3:miR-29                                 | ODZ3:miR-593           |
| rs11542347    | chr4:183960774             | ODZ3:miR-29                                 | ODZ3:miR-624           |
| rs2292899     | chr4:185915104             | ACSL1:miR-124.1:1                           | ACSL1:miR-142-3p       |



Supplemental Table 5: Consensus SNPs in miRNA target sites

| SNP ID     | SNP Position (hg18) | TargetScanS Prediction         | PITA Prediction  |
|------------|---------------------|--------------------------------|------------------|
| rs2292899  | chr4:185915104      | ACSL1:miR-124.1:1              | ACSL1:miR-34a    |
| rs2292899  | chr4:185915104      | ACSL1:miR-124.1:1              | ACSL1:miR-34b    |
| rs2292899  | chr4:185915104      | ACSL1:miR-124.1:1              | ACSL1:miR-34c    |
| rs2292899  | chr4:185915104      | ACSL1:miR-124.1:1              | ACSL1:miR-449    |
| rs2292899  | chr4:185915104      | ACSL1:miR-124.1:1              | ACSL1:miR-449b   |
| rs2292899  | chr4:185915104      | ACSL1:miR-124.2/506:1          | ACSL1:miR-142-3p |
| rs2292899  | chr4:185915104      | ACSL1:miR-124.2/506:1          | ACSL1:miR-34a    |
| rs2292899  | chr4:185915104      | ACSL1:miR-124.2/506:1          | ACSL1:miR-34b    |
| rs2292899  | chr4:185915104      | ACSL1:miR-124.2/506:1          | ACSL1:miR-34c    |
| rs2292899  | chr4:185915104      | ACSL1:miR-124.2/506:1          | ACSL1:miR-449    |
| rs2292899  | chr4:185915104      | ACSL1:miR-124.2/506:1          | ACSL1:miR-449b   |
| rs2292899  | chr4:185915104      | ACSL1:miR-34/449               | ACSL1:miR-142-3p |
| rs2292899  | chr4:185915104      | ACSL1:miR-34/449               | ACSL1:miR-34a    |
| rs2292899  | chr4:185915104      | ACSL1:miR-34/449               | ACSL1:miR-34b    |
| rs2292899  | chr4:185915104      | ACSL1:miR-34/449               | ACSL1:miR-34c    |
| rs2292899  | chr4:185915104      | ACSL1:miR-34/449               | ACSL1:miR-449    |
| rs2292899  | chr4:185915104      | ACSL1:miR-34/449               | ACSL1:miR-449b   |
| rs2292899  | chr4:185915104      | ACSL1:miR-34b                  | ACSL1:miR-142-3p |
| rs2292899  | chr4:185915104      | ACSL1:miR-34b                  | ACSL1:miR-34a    |
| rs2292899  | chr4:185915104      | ACSL1:miR-34b                  | ACSL1:miR-34b    |
| rs2292899  | chr4:185915104      | ACSL1:miR-34b                  | ACSL1:miR-34c    |
| rs2292899  | chr4:185915104      | ACSL1:miR-34b                  | ACSL1:miR-449    |
| rs2292899  | chr4:185915104      | ACSL1:miR-34b                  | ACSL1:miR-449b   |
| rs9332     | chr5:7953712        | MTRR:miR-361                   | MTRR:miR-361     |
| rs1044405  | chr5:16526310       | FLJ20152:miR-124.2/506         | FLJ20152:miR-484 |
| rs1393229  | chr5:17329645       | BASP1:miR-409-3p               | BASP1:miR-613    |
| rs1393227  | chr5:17329674       | BASP1:miR-539                  | BASP1:miR-539    |
| rs34031034 | chr5:37100871       | NIPBL:miR-324-5p               | NIPBL:miR-544    |
| rs36033427 | chr5:38974719       | RICTOR:miR-203.1               | RICTOR:miR-203   |
| rs36033427 | chr5:38974719       | RICTOR:miR-203.1               | RICTOR:miR-613   |
| rs45622440 | chr5:38974721       | RICTOR:miR-203.1               | RICTOR:miR-203   |
| rs45622440 | chr5:38974721       | RICTOR:miR-203.1               | RICTOR:miR-613   |
| rs16867891 | chr5:38976307       | RICTOR:miR-326                 | RICTOR:miR-518c* |
| rs10033    | chr5:54756680       | PPAP2A:miR-15/16/195/424/497:1 | PPAP2A:miR-503   |
| rs10045390 | chr5:56253098       | MIER3:miR-30-5p:3              | MIER3:miR-30a-5p |
| rs10045390 | chr5:56253098       | MIER3:miR-30-5p:3              | MIER3:miR-30b    |
| rs10045390 | chr5:56253098       | MIER3:miR-30-5p:3              | MIER3:miR-30c    |

**Supplemental Table 5: Consensus SNPs in miRNA target sites**

| <b>SNP ID</b> | <b>SNP Position (hg18)</b> | <b>TargetScanS Prediction</b> | <b>PITA Prediction</b> |
|---------------|----------------------------|-------------------------------|------------------------|
| rs10045390    | chr5:56253098              | MIER3:miR-30-5p:3             | MIER3:miR-30d          |
| rs10045390    | chr5:56253098              | MIER3:miR-30-5p:3             | MIER3:miR-30e-5p       |
| rs34018584    | chr5:61717685              | KIF2A:miR-1/206               | KIF2A:miR-1            |
| rs34018584    | chr5:61717685              | KIF2A:miR-1/206               | KIF2A:miR-206          |
| rs5868531     | chr5:67629989              | PIK3R1:miR-153                | PIK3R1:miR-153         |
| rs5868531     | chr5:67629989              | PIK3R1:miR-153                | PIK3R1:miR-512-3p      |
| rs5868531     | chr5:67629989              | PIK3R1:miR-448                | PIK3R1:miR-153         |
| rs5868531     | chr5:67629989              | PIK3R1:miR-448                | PIK3R1:miR-512-3p      |
| rs5868532     | chr5:67632926              | PIK3R1:miR-103/107            | PIK3R1:miR-103         |
| rs5868532     | chr5:67632926              | PIK3R1:miR-103/107            | PIK3R1:miR-107         |
| rs5868532     | chr5:67632926              | PIK3R1:miR-15/16/195/424/497  | PIK3R1:miR-103         |
| rs5868532     | chr5:67632926              | PIK3R1:miR-15/16/195/424/497  | PIK3R1:miR-107         |
| rs5868532     | chr5:67632926              | PIK3R1:miR-503                | PIK3R1:miR-103         |
| rs5868532     | chr5:67632926              | PIK3R1:miR-503                | PIK3R1:miR-107         |
| rs34873643    | chr5:67632927              | PIK3R1:miR-15/16/195/424/497  | PIK3R1:miR-103         |
| rs34873643    | chr5:67632927              | PIK3R1:miR-15/16/195/424/497  | PIK3R1:miR-107         |
| rs34873643    | chr5:67632927              | PIK3R1:miR-503                | PIK3R1:miR-103         |
| rs34873643    | chr5:67632927              | PIK3R1:miR-503                | PIK3R1:miR-107         |
| rs12518829    | chr5:72420018              | FCHO2:miR-218                 | FCHO2:miR-218          |
| rs12518829    | chr5:72420018              | FCHO2:miR-218                 | FCHO2:miR-636          |
| rs11558670    | chr5:77816981              | LHFPL2:miR-24                 | LHFPL2:miR-659         |
| rs17206014    | chr5:82912040              | VCAN:miR-203.1                | CSPG2:miR-573          |
| rs8488        | chr5:102566651             | HISPPD1:miR-181:1             | HISPPD1:miR-181b       |
| rs8488        | chr5:102566651             | HISPPD1:miR-181:1             | HISPPD1:miR-181d       |
| rs17297682    | chr5:102566693             | HISPPD1:miR-181:2             | HISPPD1:miR-181a       |
| rs17297682    | chr5:102566693             | HISPPD1:miR-181:2             | HISPPD1:miR-181c       |
| rs56059589    | chr5:109230778             | MAN2A1:miR-135                | MAN2A1:miR-135a        |
| rs56059589    | chr5:109230778             | MAN2A1:miR-135                | MAN2A1:miR-135b        |
| rs11432316    | chr5:112208127             | APC:miR-129-5p                | APC:miR-129            |
| rs11432316    | chr5:112208127             | APC:miR-129-5p                | APC:miR-568            |
| rs11432316    | chr5:112208127             | APC:miR-153:1                 | APC:miR-129            |
| rs11432316    | chr5:112208127             | APC:miR-153:1                 | APC:miR-568            |
| rs11432316    | chr5:112208127             | APC:miR-448                   | APC:miR-129            |
| rs11432316    | chr5:112208127             | APC:miR-448                   | APC:miR-568            |
| rs11432316    | chr5:112208127             | APC:miR-450                   | APC:miR-129            |
| rs11432316    | chr5:112208127             | APC:miR-450                   | APC:miR-568            |
| rs34829795    | chr5:112208128             | APC:miR-129-5p                | APC:miR-129            |

Supplemental Table 5: Consensus SNPs in miRNA target sites

| SNP ID     | SNP Position (hg18) | TargetScanS Prediction           | PITA Prediction  |
|------------|---------------------|----------------------------------|------------------|
| rs34829795 | chr5:112208128      | APC:miR-129-5p                   | APC:miR-568      |
| rs34829795 | chr5:112208128      | APC:miR-153:1                    | APC:miR-129      |
| rs34829795 | chr5:112208128      | APC:miR-153:1                    | APC:miR-568      |
| rs34829795 | chr5:112208128      | APC:miR-448                      | APC:miR-129      |
| rs34829795 | chr5:112208128      | APC:miR-448                      | APC:miR-568      |
| rs34829795 | chr5:112208128      | APC:miR-450                      | APC:miR-129      |
| rs34829795 | chr5:112208128      | APC:miR-450                      | APC:miR-568      |
| rs10558436 | chr5:122193370      | SNX2:miR-410                     | SNX2:miR-568     |
| rs1801867  | chr5:138693761      | MATR3:miR-329                    | MATR3:miR-521    |
| rs3828609  | chr5:149413056      | CSF1R:miR-155                    | CSF1R:miR-512-3p |
| rs62379673 | chr5:150864488      | FAT2:miR-17-5p/20/93/106/519.d:1 | FAT2:miR-106a    |
| rs62379673 | chr5:150864488      | FAT2:miR-17-5p/20/93/106/519.d:1 | FAT2:miR-106b    |
| rs62379673 | chr5:150864488      | FAT2:miR-17-5p/20/93/106/519.d:1 | FAT2:miR-17-5p   |
| rs62379673 | chr5:150864488      | FAT2:miR-17-5p/20/93/106/519.d:1 | FAT2:miR-20a     |
| rs62379673 | chr5:150864488      | FAT2:miR-17-5p/20/93/106/519.d:1 | FAT2:miR-20b     |
| rs62379673 | chr5:150864488      | FAT2:miR-17-5p/20/93/106/519.d:1 | FAT2:miR-302a    |
| rs62379673 | chr5:150864488      | FAT2:miR-17-5p/20/93/106/519.d:1 | FAT2:miR-302b    |
| rs62379673 | chr5:150864488      | FAT2:miR-17-5p/20/93/106/519.d:1 | FAT2:miR-302c    |
| rs62379673 | chr5:150864488      | FAT2:miR-17-5p/20/93/106/519.d:1 | FAT2:miR-302d    |
| rs62379673 | chr5:150864488      | FAT2:miR-17-5p/20/93/106/519.d:1 | FAT2:miR-373     |
| rs62379673 | chr5:150864488      | FAT2:miR-17-5p/20/93/106/519.d:1 | FAT2:miR-519d    |
| rs62379673 | chr5:150864488      | FAT2:miR-17-5p/20/93/106/519.d:1 | FAT2:miR-519e    |
| rs62379673 | chr5:150864488      | FAT2:miR-17-5p/20/93/106/519.d:1 | FAT2:miR-520a    |
| rs62379673 | chr5:150864488      | FAT2:miR-17-5p/20/93/106/519.d:1 | FAT2:miR-520b    |
| rs62379673 | chr5:150864488      | FAT2:miR-17-5p/20/93/106/519.d:1 | FAT2:miR-520c    |
| rs62379673 | chr5:150864488      | FAT2:miR-17-5p/20/93/106/519.d:1 | FAT2:miR-520d    |
| rs62379673 | chr5:150864488      | FAT2:miR-17-5p/20/93/106/519.d:1 | FAT2:miR-520e    |
| rs62379673 | chr5:150864488      | FAT2:miR-17-5p/20/93/106/519.d:1 | FAT2:miR-526b*   |
| rs998754   | chr5:161258512      | GABRA1:miR-376c                  | GABRA1:miR-153   |
| rs998754   | chr5:161258512      | GABRA1:miR-376c                  | GABRA1:miR-496   |
| rs7443935  | chr5:167622845      | ODZ2:let-7/98                    | ODZ2:let-7a      |
| rs7443935  | chr5:167622845      | ODZ2:let-7/98                    | ODZ2:let-7b      |
| rs7443935  | chr5:167622845      | ODZ2:let-7/98                    | ODZ2:let-7c      |
| rs7443935  | chr5:167622845      | ODZ2:let-7/98                    | ODZ2:let-7d      |
| rs7443935  | chr5:167622845      | ODZ2:let-7/98                    | ODZ2:let-7f      |
| rs7443935  | chr5:167622845      | ODZ2:let-7/98                    | ODZ2:let-7g      |
| rs7443935  | chr5:167622845      | ODZ2:let-7/98                    | ODZ2:let-7i      |

Supplemental Table 5: Consensus SNPs in miRNA target sites

| SNP ID     | SNP Position (hg18) | TargetScanS Prediction           | PITA Prediction    |
|------------|---------------------|----------------------------------|--------------------|
| rs7443935  | chr5:167622845      | ODZ2:let-7/98                    | ODZ2:miR-196a      |
| rs7443935  | chr5:167622845      | ODZ2:let-7/98                    | ODZ2:miR-196b      |
| rs7443935  | chr5:167622845      | ODZ2:let-7/98                    | ODZ2:miR-98        |
| rs2305737  | chr5:167878839      | RARS:miR-219                     | RARS:miR-508       |
| rs34486870 | chr5:171221591      | FBXW11:miR-331                   | FBXW11:miR-623     |
| rs35661076 | chr5:171696199      | SH3PXD2B:miR-96                  | SH3PXD2B:miR-96    |
| rs1049880  | chr5:176955648      | TMED9:miR-499                    | TMED9:miR-499      |
| rs14801    | chr5:179196851      | SQSTM1:miR-17-5p/20/93/106/519.d | SQSTM1:miR-106a    |
| rs14801    | chr5:179196851      | SQSTM1:miR-17-5p/20/93/106/519.d | SQSTM1:miR-106b    |
| rs14801    | chr5:179196851      | SQSTM1:miR-17-5p/20/93/106/519.d | SQSTM1:miR-17-5p   |
| rs14801    | chr5:179196851      | SQSTM1:miR-17-5p/20/93/106/519.d | SQSTM1:miR-20a     |
| rs14801    | chr5:179196851      | SQSTM1:miR-17-5p/20/93/106/519.d | SQSTM1:miR-20b     |
| rs14801    | chr5:179196851      | SQSTM1:miR-17-5p/20/93/106/519.d | SQSTM1:miR-372     |
| rs14801    | chr5:179196851      | SQSTM1:miR-17-5p/20/93/106/519.d | SQSTM1:miR-93      |
| rs1803841  | chr5:179595622      | MAPK9:miR-17-5p/20/93/106/519.d  | MAPK9:miR-106a     |
| rs1803841  | chr5:179595622      | MAPK9:miR-17-5p/20/93/106/519.d  | MAPK9:miR-106b     |
| rs1803841  | chr5:179595622      | MAPK9:miR-17-5p/20/93/106/519.d  | MAPK9:miR-17-5p    |
| rs1803841  | chr5:179595622      | MAPK9:miR-17-5p/20/93/106/519.d  | MAPK9:miR-20a      |
| rs1803841  | chr5:179595622      | MAPK9:miR-17-5p/20/93/106/519.d  | MAPK9:miR-20b      |
| rs1803841  | chr5:179595622      | MAPK9:miR-17-5p/20/93/106/519.d  | MAPK9:miR-520g     |
| rs1803841  | chr5:179595622      | MAPK9:miR-17-5p/20/93/106/519.d  | MAPK9:miR-520h     |
| rs1045385  | chr6:10506102       | TFAP2A:miR-200bc/429:1           | TFAP2A:miR-101     |
| rs1045385  | chr6:10506102       | TFAP2A:miR-200bc/429:1           | TFAP2A:miR-768-3p  |
| rs35188801 | chr6:12272937       | HIVEP1:miR-410                   | HIVEP1:miR-380-3p  |
| rs2205794  | chr6:16256155       | MYLIP:miR-500                    | MYLIP:miR-500      |
| rs1051950  | chr6:35573788       | TULP1:miR-134                    | TULP1:miR-134      |
| rs57137575 | chr6:37407402       | TBC1D22B:miR-149                 | TBC1D22B:miR-565   |
| rs57137575 | chr6:37407402       | TBC1D22B:miR-24                  | TBC1D22B:miR-565   |
| rs36041587 | chr6:47702213       | CD2AP:miR-181                    | CD2AP:miR-181b     |
| rs36041587 | chr6:47702213       | CD2AP:miR-181                    | CD2AP:miR-181d     |
| rs60499238 | chr6:80681363       | ELOVL4:miR-329                   | ELOVL4:miR-32      |
| rs60499238 | chr6:80681363       | ELOVL4:miR-329                   | ELOVL4:miR-603     |
| rs1046001  | chr6:89931074       | ACY1L2:miR-384                   | ACY1L2:miR-384     |
| rs1052258  | chr6:118134939      | NUS1:miR-30-5p                   | C6orf68:miR-30a-5p |
| rs1052258  | chr6:118134939      | NUS1:miR-30-5p                   | C6orf68:miR-30b    |
| rs1052258  | chr6:118134939      | NUS1:miR-30-5p                   | C6orf68:miR-30c    |
| rs1052258  | chr6:118134939      | NUS1:miR-30-5p                   | C6orf68:miR-30d    |

Supplemental Table 5: Consensus SNPs in miRNA target sites

| SNP ID     | SNP Position (hg18) | TargetScanS Prediction           | PITA Prediction    |
|------------|---------------------|----------------------------------|--------------------|
| rs1052258  | chr6:118134939      | NUS1:miR-30-5p                   | C6orf68:miR-30e-5p |
| rs36028195 | chr6:134349945      | TBPL1:miR-145                    | TBPL1:miR-145      |
| rs10608076 | chr6:136555172      | PDE7B:miR-369-3p:1               | PDE7B:miR-633      |
| rs10608076 | chr6:136555172      | PDE7B:miR-374                    | PDE7B:miR-633      |
| rs11558463 | chr6:152484616      | SYNE1:miR-181                    | SYNE1:miR-181a     |
| rs11558463 | chr6:152484616      | SYNE1:miR-181                    | SYNE1:miR-181c     |
| rs11558463 | chr6:152484616      | SYNE1:miR-543                    | SYNE1:miR-181a     |
| rs11558463 | chr6:152484616      | SYNE1:miR-543                    | SYNE1:miR-181c     |
| rs14556    | chr7:16712557       | BZW2:miR-101                     | BZW2:miR-101       |
| rs35259071 | chr7:19122056       | TWIST1:miR-361                   | TWIST1:miR-361     |
| rs1045957  | chr7:20421339       | ITGB8:miR-19:2                   | ITGB8:miR-19a      |
| rs1045957  | chr7:20421339       | ITGB8:miR-19:2                   | ITGB8:miR-19b      |
| rs11557711 | chr7:26198127       | HNRPA2B1:miR-539                 | HNRNPA2B1:miR-548c |
| rs9807     | chr7:26198130       | HNRPA2B1:miR-539                 | HNRNPA2B1:miR-548c |
| rs7786554  | chr7:27099494       | HOXA1:miR-99/100                 | HOXA1:miR-100      |
| rs7786554  | chr7:27099494       | HOXA1:miR-99/100                 | HOXA1:miR-99a      |
| rs7786554  | chr7:27099494       | HOXA1:miR-99/100                 | HOXA1:miR-99b      |
| rs17449017 | chr7:27099672       | HOXA1:miR-181                    | HOXA1:miR-181b     |
| rs17449017 | chr7:27099672       | HOXA1:miR-181                    | HOXA1:miR-181d     |
| rs41305921 | chr7:27100130       | HOXA1:miR-30-5p                  | HOXA1:miR-30a-5p   |
| rs41305921 | chr7:27100130       | HOXA1:miR-30-5p                  | HOXA1:miR-30b      |
| rs41305921 | chr7:27100130       | HOXA1:miR-30-5p                  | HOXA1:miR-30c      |
| rs41305921 | chr7:27100130       | HOXA1:miR-30-5p                  | HOXA1:miR-30d      |
| rs41305921 | chr7:27100130       | HOXA1:miR-30-5p                  | HOXA1:miR-30e-5p   |
| rs3834868  | chr7:29519322       | CHN2:miR-543                     | CHN2:miR-578       |
| rs1139448  | chr7:41695599       | INHBA:miR-205                    | INHBA:miR-205      |
| rs1139448  | chr7:41695599       | INHBA:miR-205                    | INHBA:miR-579      |
| rs56252693 | chr7:44840507       | H2AFV:miR-139                    | H2AFV:miR-139      |
| rs56252693 | chr7:44840507       | H2AFV:miR-139                    | H2AFV:miR-199a*    |
| rs15555    | chr7:44885974       | PURB:miR-17-5p/20/93/106/519.d:1 | PURB:miR-106a      |
| rs15555    | chr7:44885974       | PURB:miR-17-5p/20/93/106/519.d:1 | PURB:miR-106b      |
| rs15555    | chr7:44885974       | PURB:miR-17-5p/20/93/106/519.d:1 | PURB:miR-17-5p     |
| rs15555    | chr7:44885974       | PURB:miR-17-5p/20/93/106/519.d:1 | PURB:miR-20a       |
| rs15555    | chr7:44885974       | PURB:miR-17-5p/20/93/106/519.d:1 | PURB:miR-20b       |
| rs15555    | chr7:44885974       | PURB:miR-17-5p/20/93/106/519.d:1 | PURB:miR-302a      |
| rs15555    | chr7:44885974       | PURB:miR-17-5p/20/93/106/519.d:1 | PURB:miR-302b      |
| rs15555    | chr7:44885974       | PURB:miR-17-5p/20/93/106/519.d:1 | PURB:miR-302c      |

Supplemental Table 5: Consensus SNPs in miRNA target sites

| SNP ID     | SNP Position (hg18) | TargetScanS Prediction                     | PITA Prediction   |
|------------|---------------------|--------------------------------------------|-------------------|
| rs15555    | chr7:44885974       | PURB:miR-17-5p/20/93/106/519.d:1           | PURB:miR-302d     |
| rs15555    | chr7:44885974       | PURB:miR-17-5p/20/93/106/519.d:1           | PURB:miR-373      |
| rs15555    | chr7:44885974       | PURB:miR-17-5p/20/93/106/519.d:1           | PURB:miR-383      |
| rs15555    | chr7:44885974       | PURB:miR-17-5p/20/93/106/519.d:1           | PURB:miR-520a     |
| rs15555    | chr7:44885974       | PURB:miR-17-5p/20/93/106/519.d:1           | PURB:miR-520b     |
| rs15555    | chr7:44885974       | PURB:miR-17-5p/20/93/106/519.d:1           | PURB:miR-520c     |
| rs15555    | chr7:44885974       | PURB:miR-17-5p/20/93/106/519.d:1           | PURB:miR-520d     |
| rs15555    | chr7:44885974       | PURB:miR-17-5p/20/93/106/519.d:1           | PURB:miR-520e     |
| rs15555    | chr7:44885974       | PURB:miR-17-5p/20/93/106/519.d:1           | PURB:miR-526b*    |
| rs15555    | chr7:44885974       | PURB:miR-93/291-3p/294/295/302/372/373/520 | PURB:miR-106a     |
| rs15555    | chr7:44885974       | PURB:miR-93/291-3p/294/295/302/372/373/520 | PURB:miR-106b     |
| rs15555    | chr7:44885974       | PURB:miR-93/291-3p/294/295/302/372/373/520 | PURB:miR-17-5p    |
| rs15555    | chr7:44885974       | PURB:miR-93/291-3p/294/295/302/372/373/520 | PURB:miR-20a      |
| rs15555    | chr7:44885974       | PURB:miR-93/291-3p/294/295/302/372/373/520 | PURB:miR-20b      |
| rs15555    | chr7:44885974       | PURB:miR-93/291-3p/294/295/302/372/373/520 | PURB:miR-302a     |
| rs15555    | chr7:44885974       | PURB:miR-93/291-3p/294/295/302/372/373/520 | PURB:miR-302b     |
| rs15555    | chr7:44885974       | PURB:miR-93/291-3p/294/295/302/372/373/520 | PURB:miR-302c     |
| rs15555    | chr7:44885974       | PURB:miR-93/291-3p/294/295/302/372/373/520 | PURB:miR-302d     |
| rs15555    | chr7:44885974       | PURB:miR-93/291-3p/294/295/302/372/373/520 | PURB:miR-373      |
| rs15555    | chr7:44885974       | PURB:miR-93/291-3p/294/295/302/372/373/520 | PURB:miR-383      |
| rs15555    | chr7:44885974       | PURB:miR-93/291-3p/294/295/302/372/373/520 | PURB:miR-520a     |
| rs15555    | chr7:44885974       | PURB:miR-93/291-3p/294/295/302/372/373/520 | PURB:miR-520b     |
| rs15555    | chr7:44885974       | PURB:miR-93/291-3p/294/295/302/372/373/520 | PURB:miR-520c     |
| rs15555    | chr7:44885974       | PURB:miR-93/291-3p/294/295/302/372/373/520 | PURB:miR-520d     |
| rs15555    | chr7:44885974       | PURB:miR-93/291-3p/294/295/302/372/373/520 | PURB:miR-520e     |
| rs15555    | chr7:44885974       | PURB:miR-93/291-3p/294/295/302/372/373/520 | PURB:miR-526b*    |
| rs3832522  | chr7:44887769       | PURB:miR-129-5p                            | PURB:miR-768-5p   |
| rs2272282  | chr7:96478213       | DLX6:miR-505                               | DLX6:miR-144      |
| rs35095297 | chr7:100116401      | PERQ1:miR-181:1                            | PERQ1:miR-181b    |
| rs35095297 | chr7:100116401      | PERQ1:miR-181:1                            | PERQ1:miR-181d    |
| rs11762601 | chr7:100987767      | EMID2:miR-340                              | EMID2:miR-766     |
| rs59573982 | chr7:112193225      | TMEM168:miR-135                            | FLJ13576:miR-135a |
| rs59573982 | chr7:112193225      | TMEM168:miR-135                            | FLJ13576:miR-135b |
| rs59573982 | chr7:112193225      | TMEM168:miR-135                            | FLJ13576:miR-522  |
| rs13225586 | chr7:120175764      | KCND2:miR-363                              | KCND2:miR-557     |
| rs41274233 | chr7:128198200      | CALU:miR-7                                 | CALU:miR-7        |
| rs17168525 | chr7:135263802      | MTPN:let-7/98                              | MTPN:miR-202      |

Supplemental Table 5: Consensus SNPs in miRNA target sites

| SNP ID     | SNP Position (hg18) | TargetScanS Prediction            | PITA Prediction     |
|------------|---------------------|-----------------------------------|---------------------|
| rs17168525 | chr7:135263802      | MTPN:miR-181                      | MTPN:miR-202        |
| rs13233916 | chr7:138524956      | TTC26:miR-124.2/506               | TTC26:miR-506       |
| rs17620927 | chr7:139799780      | MKRN1:miR-17-5p/20/93/106/519.d:1 | MKRN1:miR-106a      |
| rs17620927 | chr7:139799780      | MKRN1:miR-17-5p/20/93/106/519.d:1 | MKRN1:miR-106b      |
| rs17620927 | chr7:139799780      | MKRN1:miR-17-5p/20/93/106/519.d:1 | MKRN1:miR-17-5p     |
| rs17620927 | chr7:139799780      | MKRN1:miR-17-5p/20/93/106/519.d:1 | MKRN1:miR-20a       |
| rs17620927 | chr7:139799780      | MKRN1:miR-17-5p/20/93/106/519.d:1 | MKRN1:miR-20b       |
| rs17620927 | chr7:139799780      | MKRN1:miR-17-5p/20/93/106/519.d:1 | MKRN1:miR-302a      |
| rs17620927 | chr7:139799780      | MKRN1:miR-17-5p/20/93/106/519.d:1 | MKRN1:miR-302b      |
| rs17620927 | chr7:139799780      | MKRN1:miR-17-5p/20/93/106/519.d:1 | MKRN1:miR-302c      |
| rs17620927 | chr7:139799780      | MKRN1:miR-17-5p/20/93/106/519.d:1 | MKRN1:miR-302d      |
| rs17620927 | chr7:139799780      | MKRN1:miR-17-5p/20/93/106/519.d:1 | MKRN1:miR-373       |
| rs17620927 | chr7:139799780      | MKRN1:miR-17-5p/20/93/106/519.d:1 | MKRN1:miR-519d      |
| rs17620927 | chr7:139799780      | MKRN1:miR-17-5p/20/93/106/519.d:1 | MKRN1:miR-519e      |
| rs17620927 | chr7:139799780      | MKRN1:miR-17-5p/20/93/106/519.d:1 | MKRN1:miR-520a      |
| rs17620927 | chr7:139799780      | MKRN1:miR-17-5p/20/93/106/519.d:1 | MKRN1:miR-520b      |
| rs17620927 | chr7:139799780      | MKRN1:miR-17-5p/20/93/106/519.d:1 | MKRN1:miR-520c      |
| rs17620927 | chr7:139799780      | MKRN1:miR-17-5p/20/93/106/519.d:1 | MKRN1:miR-520d      |
| rs17620927 | chr7:139799780      | MKRN1:miR-17-5p/20/93/106/519.d:1 | MKRN1:miR-520e      |
| rs17620927 | chr7:139799780      | MKRN1:miR-17-5p/20/93/106/519.d:1 | MKRN1:miR-526*      |
| rs8829     | chr7:148135551      | EZH2:miR-101:2                    | EZH2:miR-101        |
| rs8829     | chr7:148135551      | EZH2:miR-144                      | EZH2:miR-101        |
| rs62481481 | chr7:151463368      | MLL3:miR-490                      | MLL3:miR-659        |
| rs34664602 | chr8:1638873        | DLGAP2:miR-129-5p:2               | DLGAP2:miR-129      |
| rs34664602 | chr8:1638873        | DLGAP2:miR-33                     | DLGAP2:miR-129      |
| rs34664602 | chr8:1638873        | DLGAP2:miR-450:2                  | DLGAP2:miR-129      |
| rs34341867 | chr8:22334511       | SLC39A14:miR-490                  | SLC39A14:miR-490    |
| rs34341867 | chr8:22334511       | SLC39A14:miR-490                  | SLC39A14:miR-516-5p |
| rs34341867 | chr8:22334511       | SLC39A14:miR-490                  | SLC39A14:miR-765    |
| rs60163317 | chr8:23758153       | STC1:miR-101:1                    | STC1:miR-144        |
| rs60163317 | chr8:23758153       | STC1:miR-101:1                    | STC1:miR-148a       |
| rs60163317 | chr8:23758153       | STC1:miR-101:1                    | STC1:miR-564        |
| rs4056572  | chr8:25341643       | KCTD9:miR-203.1                   | KCTD9:miR-522       |
| rs4056572  | chr8:25341643       | KCTD9:miR-203.1                   | KCTD9:miR-573       |
| rs1058457  | chr8:26571493       | DPYSL2:miR-409-5p                 | DPYSL2:miR-34b      |
| rs11548610 | chr8:38389779       | FGFR1:miR-330                     | FGFR1:miR-545       |
| rs11548610 | chr8:38389779       | FGFR1:miR-330                     | FGFR1:miR-559       |

Supplemental Table 5: Consensus SNPs in miRNA target sites

| SNP ID     | SNP Position (hg18) | TargetScanS Prediction | PITA Prediction   |
|------------|---------------------|------------------------|-------------------|
| rs11558227 | chr8:42382254       | VDAC3:miR-7            | VDAC3:miR-768-5p  |
| rs11558227 | chr8:42382254       | VDAC3:miR-9            | VDAC3:miR-768-5p  |
| rs11782817 | chr8:57236787       | PLAG1:miR-128          | PLAG1:miR-144     |
| rs11782817 | chr8:57236787       | PLAG1:miR-128          | PLAG1:miR-27a     |
| rs11782817 | chr8:57236787       | PLAG1:miR-128          | PLAG1:miR-27b     |
| rs11782817 | chr8:57236787       | PLAG1:miR-144          | PLAG1:miR-144     |
| rs11782817 | chr8:57236787       | PLAG1:miR-144          | PLAG1:miR-27a     |
| rs11782817 | chr8:57236787       | PLAG1:miR-144          | PLAG1:miR-27b     |
| rs11782817 | chr8:57236787       | PLAG1:miR-224          | PLAG1:miR-144     |
| rs11782817 | chr8:57236787       | PLAG1:miR-224          | PLAG1:miR-27a     |
| rs11782817 | chr8:57236787       | PLAG1:miR-224          | PLAG1:miR-27b     |
| rs11782817 | chr8:57236787       | PLAG1:miR-27           | PLAG1:miR-144     |
| rs11782817 | chr8:57236787       | PLAG1:miR-27           | PLAG1:miR-27a     |
| rs11782817 | chr8:57236787       | PLAG1:miR-27           | PLAG1:miR-27b     |
| rs60220895 | chr8:71186929       | NCOA2:miR-448          | NCOA2:miR-647     |
| rs60220895 | chr8:71186929       | NCOA2:miR-448          | NCOA2:miR-656     |
| rs62526888 | chr8:91706943       | TMEM64:miR-19          | TMEM64:miR-186    |
| rs3830308  | chr8:92040248       | EFCBP1:miR-186         | EFCBP1:miR-186    |
| rs34984375 | chr8:92040255       | EFCBP1:miR-142-5p      | EFCBP1:miR-186    |
| rs34984375 | chr8:92040255       | EFCBP1:miR-186         | EFCBP1:miR-186    |
| rs61058951 | chr8:102769800      | NCALD:miR-19           | NCALD:miR-527     |
| rs2809     | chr8:103908539      | AZIN1:miR-96           | AZIN1:miR-593     |
| rs2809     | chr8:103908539      | AZIN1:miR-96           | AZIN1:miR-96      |
| rs1053039  | chr8:106885662      | ZFPM2:miR-142-5p:3     | ZFPM2:miR-142-5p  |
| rs12542906 | chr8:107833970      | OXR1:miR-7             | OXR1:miR-7        |
| rs1045664  | chr8:113304383      | CSMD3:miR-496:1        | CSMD3:miR-561     |
| rs3134037  | chr8:120005452      | TNFRSF11B:miR-216      | TNFRSF11B:miR-216 |
| rs3134038  | chr8:120005457      | TNFRSF11B:miR-216      | TNFRSF11B:miR-216 |
| rs4736611  | chr8:133927894      | PHF20L1:miR-181        | PHF20L1:miR-181b  |
| rs4736611  | chr8:133927894      | PHF20L1:miR-181        | PHF20L1:miR-181d  |
| rs5895799  | chr8:145062072      | PLEC1:miR-124.2/506:1  | PLEC1:miR-124a    |
| rs5895799  | chr8:145062072      | PLEC1:miR-124.2/506:1  | PLEC1:miR-506     |
| rs5895799  | chr8:145062072      | PLEC1:miR-124.2/506:1  | PLEC1:miR-566     |
| rs35275364 | chr9:5764270        | KIAA1432:miR-200bc/429 | KIAA1432:miR-200b |
| rs35275364 | chr9:5764270        | KIAA1432:miR-200bc/429 | KIAA1432:miR-200c |
| rs35275364 | chr9:5764270        | KIAA1432:miR-200bc/429 | KIAA1432:miR-429  |
| rs62536166 | chr9:8304850        | PTPRD:miR-148/152      | PTPRD:miR-148b    |



Supplemental Table 5: Consensus SNPs in miRNA target sites

| SNP ID     | SNP Position (hg18) | TargetScanS Prediction      | PITA Prediction   |
|------------|---------------------|-----------------------------|-------------------|
| rs62536166 | chr9:8304850        | PTPRD:miR-148/152           | PTPRD:miR-152     |
| rs62536166 | chr9:8304850        | PTPRD:miR-148/152           | PTPRD:miR-153     |
| rs62536166 | chr9:8304850        | PTPRD:miR-148/152           | PTPRD:miR-34a     |
| rs62536166 | chr9:8304850        | PTPRD:miR-148/152           | PTPRD:miR-34c     |
| rs62536166 | chr9:8304850        | PTPRD:miR-148/152           | PTPRD:miR-449     |
| rs62536166 | chr9:8304850        | PTPRD:miR-148/152           | PTPRD:miR-449b    |
| rs62536166 | chr9:8304850        | PTPRD:miR-153               | PTPRD:miR-148b    |
| rs62536166 | chr9:8304850        | PTPRD:miR-153               | PTPRD:miR-152     |
| rs62536166 | chr9:8304850        | PTPRD:miR-153               | PTPRD:miR-153     |
| rs62536166 | chr9:8304850        | PTPRD:miR-153               | PTPRD:miR-34a     |
| rs62536166 | chr9:8304850        | PTPRD:miR-153               | PTPRD:miR-34c     |
| rs62536166 | chr9:8304850        | PTPRD:miR-153               | PTPRD:miR-449     |
| rs62536166 | chr9:8304850        | PTPRD:miR-153               | PTPRD:miR-449b    |
| rs3209160  | chr9:14608316       | ZDHHC21:miR-196             | ZDHHC21:miR-196a  |
| rs3209160  | chr9:14608316       | ZDHHC21:miR-196             | ZDHHC21:miR-196b  |
| rs3179845  | chr9:16406403       | BNC2:miR-452                | BNC2:miR-452      |
| rs13297394 | chr9:32530842       | TOPORS:miR-488              | TOPORS:miR-488    |
| rs1053447  | chr9:35046679       | VCP:miR-410                 | VCP:miR-568       |
| rs1053318  | chr9:35046961       | VCP:miR-339                 | VCP:miR-339       |
| rs41278297 | chr9:37428158       | ZBTB5:miR-29:2              | ZBTB5:miR-29a     |
| rs41278297 | chr9:37428158       | ZBTB5:miR-29:2              | ZBTB5:miR-29b     |
| rs41278297 | chr9:37428158       | ZBTB5:miR-29:2              | ZBTB5:miR-29c     |
| rs41286035 | chr9:72031225       | MAMDC2:miR-217              | MAMDC2:miR-7      |
| rs3182600  | chr9:74159224       | ZFAND5:miR-369-3p           | ZFAND5:miR-369-3p |
| rs3182600  | chr9:74159224       | ZFAND5:miR-369-3p           | ZFAND5:miR-374    |
| rs3182600  | chr9:74159224       | ZFAND5:miR-496              | ZFAND5:miR-369-3p |
| rs3182600  | chr9:74159224       | ZFAND5:miR-496              | ZFAND5:miR-374    |
| rs41283642 | chr9:100955708      | TGFBR1:miR-142-3p           | TGFBR1:miR-142-3p |
| rs11550076 | chr9:109287173      | KLF4:miR-25/32/92/363/367:2 | KLF4:miR-32       |
| rs11550076 | chr9:109287173      | KLF4:miR-25/32/92/363/367:2 | KLF4:miR-363      |
| rs41274378 | chr9:126324569      | NR6A1:miR-377               | NR6A1:miR-377     |
| rs1110026  | chr9:126324572      | NR6A1:miR-377               | NR6A1:miR-335     |
| rs1110026  | chr9:126324572      | NR6A1:miR-377               | NR6A1:miR-377     |
| rs56802879 | chr9:129534766      | TOR2A:miR-380-5p            | TOR2A:miR-594     |
| rs3780189  | chr9:138238037      | QSCN6L1:miR-323             | QSOX2:miR-656     |
| rs17293531 | chr10:848207        | LARP5:miR-409-5p:1          | LARP5:miR-485-5p  |
| rs3839918  | chr10:8156247       | GATA3:miR-27                | GATA3:miR-101     |

Supplemental Table 5: Consensus SNPs in miRNA target sites

| SNP ID     | SNP Position (hg18) | TargetScanS Prediction                         | PITA Prediction   |
|------------|---------------------|------------------------------------------------|-------------------|
| rs61048750 | chr10:11542657      | USP6NL:miR-410                                 | USP6NL:miR-568    |
| rs3057294  | chr10:11542660      | USP6NL:miR-410                                 | USP6NL:miR-548c   |
| rs3057294  | chr10:11542660      | USP6NL:miR-410                                 | USP6NL:miR-568    |
| rs5783611  | chr10:18869987      | CACNB2:miR-30-5p                               | CACNB2:miR-30a-5p |
| rs5783611  | chr10:18869987      | CACNB2:miR-30-5p                               | CACNB2:miR-30b    |
| rs5783611  | chr10:18869987      | CACNB2:miR-30-5p                               | CACNB2:miR-30c    |
| rs5783611  | chr10:18869987      | CACNB2:miR-30-5p                               | CACNB2:miR-30d    |
| rs5783611  | chr10:18869987      | CACNB2:miR-30-5p                               | CACNB2:miR-30e-5p |
| rs33980121 | chr10:18869988      | CACNB2:miR-30-5p                               | CACNB2:miR-30a-5p |
| rs33980121 | chr10:18869988      | CACNB2:miR-30-5p                               | CACNB2:miR-30b    |
| rs33980121 | chr10:18869988      | CACNB2:miR-30-5p                               | CACNB2:miR-30c    |
| rs33980121 | chr10:18869988      | CACNB2:miR-30-5p                               | CACNB2:miR-30d    |
| rs33980121 | chr10:18869988      | CACNB2:miR-30-5p                               | CACNB2:miR-30e-5p |
| rs16921055 | chr10:21110991      | NEBL:miR-410                                   | NEBL:miR-568      |
| rs12360168 | chr10:21842580      | FLJ45187:miR-130/301:3                         | FLJ45187:miR-19a  |
| rs12360168 | chr10:21842580      | FLJ45187:miR-130/301:3                         | FLJ45187:miR-19b  |
| rs12360168 | chr10:21842580      | FLJ45187:miR-19:1                              | FLJ45187:miR-19a  |
| rs12360168 | chr10:21842580      | FLJ45187:miR-19:1                              | FLJ45187:miR-19b  |
| rs12360168 | chr10:21842580      | FLJ45187:miR-93/291-3p/294/295/302/372/373/520 | FLJ45187:miR-19a  |
| rs12360168 | chr10:21842580      | FLJ45187:miR-93/291-3p/294/295/302/372/373/520 | FLJ45187:miR-19b  |
| rs1127941  | chr10:24912575      | ARHGAP21:miR-145                               | ARHGAP21:miR-199a |
| rs1127941  | chr10:24912575      | ARHGAP21:miR-145                               | ARHGAP21:miR-199b |
| rs1127941  | chr10:24912575      | ARHGAP21:miR-199                               | ARHGAP21:miR-199a |
| rs1127941  | chr10:24912575      | ARHGAP21:miR-199                               | ARHGAP21:miR-199b |
| rs3184313  | chr10:24912974      | ARHGAP21:miR-183                               | ARHGAP21:miR-183  |
| rs3184313  | chr10:24912974      | ARHGAP21:miR-183                               | ARHGAP21:miR-652  |
| rs59203025 | chr10:31856614      | ZEB1:miR-150                                   | ZEB1:miR-629      |
| rs2435355  | chr10:42944839      | RET:miR-377                                    | RET:miR-602       |
| rs59457804 | chr10:69346428      | SIRT1:miR-30-5p                                | SIRT1:miR-30a-5p  |
| rs59457804 | chr10:69346428      | SIRT1:miR-30-5p                                | SIRT1:miR-30b     |
| rs59457804 | chr10:69346428      | SIRT1:miR-30-5p                                | SIRT1:miR-30c     |
| rs59457804 | chr10:69346428      | SIRT1:miR-30-5p                                | SIRT1:miR-30d     |
| rs59457804 | chr10:69346428      | SIRT1:miR-30-5p                                | SIRT1:miR-30e-5p  |
| rs3832648  | chr10:92491648      | HTR7:miR-504                                   | HTR7:miR-10a      |
| rs3832648  | chr10:92491648      | HTR7:miR-504                                   | HTR7:miR-10b      |
| rs1135170  | chr10:102578873     | PAX2:miR-153                                   | PAX2:miR-368      |
| rs1135170  | chr10:102578873     | PAX2:miR-448                                   | PAX2:miR-368      |

Supplemental Table 5: Consensus SNPs in miRNA target sites

| SNP ID     | SNP Position (hg18) | TargetScanS Prediction          | PITA Prediction    |
|------------|---------------------|---------------------------------|--------------------|
| rs34928771 | chr10:102712639     | C10orf6:miR-130/301:1           | C10orf6:miR-130a   |
| rs34928771 | chr10:102712639     | C10orf6:miR-130/301:1           | C10orf6:miR-130b   |
| rs34928771 | chr10:102712639     | C10orf6:miR-130/301:1           | C10orf6:miR-301    |
| rs34928771 | chr10:102712639     | C10orf6:miR-130/301:1           | C10orf6:miR-454-3p |
| rs3184159  | chr10:104565974     | C10orf26:miR-128                | C10orf26:miR-27a   |
| rs3184159  | chr10:104565974     | C10orf26:miR-128                | C10orf26:miR-27b   |
| rs3184159  | chr10:104565974     | C10orf26:miR-27:2               | C10orf26:miR-27a   |
| rs3184159  | chr10:104565974     | C10orf26:miR-27:2               | C10orf26:miR-27b   |
| rs57707166 | chr10:105138640     | TAF5:miR-26                     | TAF5:miR-595       |
| rs59729564 | chr10:108324167     | SORCS1:miR-363                  | SORCS1:miR-500     |
| rs59729564 | chr10:108324167     | SORCS1:miR-363                  | SORCS1:miR-507     |
| rs59729564 | chr10:108324167     | SORCS1:miR-452                  | SORCS1:miR-500     |
| rs59729564 | chr10:108324167     | SORCS1:miR-452                  | SORCS1:miR-507     |
| rs59729564 | chr10:108324167     | SORCS1:miR-500                  | SORCS1:miR-500     |
| rs59729564 | chr10:108324167     | SORCS1:miR-500                  | SORCS1:miR-507     |
| rs34154255 | chr10:108326704     | SORCS1:miR-383                  | SORCS1:miR-383     |
| rs2233938  | chr10:112043876     | SMNDC1:miR-143                  | SMNDC1:miR-143     |
| rs238739   | chr10:115795379     | ADRB1:miR-30-5p                 | ADRB1:miR-30a-5p   |
| rs238739   | chr10:115795379     | ADRB1:miR-30-5p                 | ADRB1:miR-30b      |
| rs238739   | chr10:115795379     | ADRB1:miR-30-5p                 | ADRB1:miR-30c      |
| rs238739   | chr10:115795379     | ADRB1:miR-30-5p                 | ADRB1:miR-30d      |
| rs238739   | chr10:115795379     | ADRB1:miR-30-5p                 | ADRB1:miR-30e-5p   |
| rs41284400 | chr10:119755562     | RAB11FIP2:miR-15/16/195/424/497 | RAB11FIP2:miR-424  |
| rs41294349 | chr10:123228976     | FGFR2:miR-338                   | FGFR2:miR-338      |
| rs41294349 | chr10:123228976     | FGFR2:miR-338                   | FGFR2:miR-770-5p   |
| rs3763763  | chr10:124003594     | TACC2:miR-25/32/92/363/367      | TACC2:miR-363      |
| rs1058510  | chr10:126667068     | CTBP2:miR-381                   | CTBP2:miR-455      |
| rs34107887 | chr10:131525672     | EBF3:miR-145:1                  | EBF3:miR-145       |
| rs34107887 | chr10:131525672     | EBF3:miR-145:1                  | EBF3:miR-30a-3p    |
| rs34107887 | chr10:131525672     | EBF3:miR-145:1                  | EBF3:miR-30e-3p    |
| rs1052593  | chr11:2861449       | CDKN1C:miR-363                  | CDKN1C:miR-129     |
| rs4698     | chr11:10285343      | ADM:miR-181                     | ADM:miR-181b       |
| rs4698     | chr11:10285343      | ADM:miR-181                     | ADM:miR-181d       |
| rs10551096 | chr11:35598852      | FJX1:miR-17-5p/20/93/106/519.d  | FJX1:miR-18a       |
| rs10551096 | chr11:35598852      | FJX1:miR-17-5p/20/93/106/519.d  | FJX1:miR-18b       |
| rs10551096 | chr11:35598852      | FJX1:miR-17-5p/20/93/106/519.d  | FJX1:miR-559       |
| rs708228   | chr11:57342238      | CTNND1:miR-29                   | CTNND1:miR-593     |

Supplemental Table 5: Consensus SNPs in miRNA target sites

| SNP ID     | SNP Position (hg18) | TargetScanS Prediction          | PITA Prediction   |
|------------|---------------------|---------------------------------|-------------------|
| rs708228   | chr11:57342238      | CTNND1:miR-29                   | CTNND1:miR-624    |
| rs633713   | chr11:58141817      | ZFP91:miR-129-5p                | ZFP91:miR-511     |
| rs1058021  | chr11:60926820      | FLJ12529:miR-361                | FLJ12529:miR-361  |
| rs1050059  | chr11:62040026      | AHNAK:miR-17-5p/20/93/106/519.d | AHNAK:miR-106a    |
| rs1050059  | chr11:62040026      | AHNAK:miR-17-5p/20/93/106/519.d | AHNAK:miR-106b    |
| rs1050059  | chr11:62040026      | AHNAK:miR-17-5p/20/93/106/519.d | AHNAK:miR-17-5p   |
| rs1050059  | chr11:62040026      | AHNAK:miR-17-5p/20/93/106/519.d | AHNAK:miR-20a     |
| rs1050059  | chr11:62040026      | AHNAK:miR-17-5p/20/93/106/519.d | AHNAK:miR-20b     |
| rs1050059  | chr11:62040026      | AHNAK:miR-17-5p/20/93/106/519.d | AHNAK:miR-372     |
| rs1050059  | chr11:62040026      | AHNAK:miR-17-5p/20/93/106/519.d | AHNAK:miR-93      |
| rs34502085 | chr11:63728474      | STIP1:miR-324-3p                | STIP1:miR-18a*    |
| rs34488116 | chr11:85347206      | PICALM:miR-1/206                | PICALM:miR-613    |
| rs36094205 | chr11:85347218      | PICALM:miR-217                  | PICALM:miR-632    |
| rs15135    | chr11:86334451      | FZD4:miR-101:2                  | FZD4:miR-144      |
| rs15135    | chr11:86334451      | FZD4:miR-144:2                  | FZD4:miR-144      |
| rs11574857 | chr11:93919323      | FUT4:miR-23                     | FUT4:miR-23a      |
| rs11574857 | chr11:93919323      | FUT4:miR-23                     | FUT4:miR-23b      |
| rs11574857 | chr11:93919323      | FUT4:miR-323                    | FUT4:miR-23a      |
| rs11574857 | chr11:93919323      | FUT4:miR-323                    | FUT4:miR-23b      |
| rs1048876  | chr11:114552104     | CADM1:miR-124.2/506             | CADM1:miR-124a    |
| rs608176   | chr11:117538999     | SCN2B:miR-141/200a              | SCN2B:miR-330     |
| rs9332868  | chr11:117898633     | MLL:miR-150                     | MLL:miR-150       |
| rs35180728 | chr11:117978797     | ARCN1:miR-1/206                 | ARCN1:miR-409-3p  |
| rs35180728 | chr11:117978797     | ARCN1:miR-1/206                 | ARCN1:miR-613     |
| rs35180728 | chr11:117978797     | ARCN1:miR-409-3p                | ARCN1:miR-409-3p  |
| rs35180728 | chr11:117978797     | ARCN1:miR-409-3p                | ARCN1:miR-613     |
| rs61900003 | chr11:118712580     | RNF26:miR-153                   | RNF26:miR-153     |
| rs61900003 | chr11:118712580     | RNF26:miR-448                   | RNF26:miR-153     |
| rs3737336  | chr11:125335907     | CDON:miR-181                    | CDON:miR-181b     |
| rs3737336  | chr11:125335907     | CDON:miR-181                    | CDON:miR-181d     |
| rs1049496  | chr11:125789619     | ST3GAL4:miR-326                 | ST3GAL4:miR-518c* |
| rs1049496  | chr11:125789619     | ST3GAL4:miR-326                 | ST3GAL4:miR-642   |
| rs41302401 | chr11:128186433     | FLI1:miR-9                      | FLI1:miR-9        |
| rs11555857 | chr11:131711301     | HNT:miR-495:2                   | HNT:miR-302b*     |
| rs34429881 | chr12:263637        | JARID1A:miR-132/212:2           | JARID1A:miR-633   |
| rs34429881 | chr12:263637        | JARID1A:miR-194                 | JARID1A:miR-633   |
| rs61635955 | chr12:4792800       | KCNA6:miR-153                   | KCNA6:miR-153     |

Supplemental Table 5: Consensus SNPs in miRNA target sites

| SNP ID     | SNP Position (hg18) | TargetScanS Prediction                     | PITA Prediction  |
|------------|---------------------|--------------------------------------------|------------------|
| rs61635955 | chr12:4792800       | KCNA6:miR-448                              | KCNA6:miR-153    |
| rs1049342  | chr12:6549558       | CHD4:miR-140                               | CHD4:miR-140     |
| rs11539540 | chr12:6549558       | CHD4:miR-140                               | CHD4:miR-140     |
| rs16932921 | chr12:6798830       | CD4:miR-181                                | CD4:miR-181b     |
| rs16932921 | chr12:6798830       | CD4:miR-181                                | CD4:miR-181d     |
| rs16932921 | chr12:6798830       | CD4:miR-181                                | CD4:miR-579      |
| rs34166149 | chr12:11935661      | ETV6:miR-369-3p                            | ETV6:miR-380-3p  |
| rs34166149 | chr12:11935661      | ETV6:miR-374                               | ETV6:miR-380-3p  |
| rs34166149 | chr12:11935661      | ETV6:miR-410                               | ETV6:miR-380-3p  |
| rs12227395 | chr12:41128411      | PPHLN1:miR-141/200a                        | PPHLN1:miR-514   |
| rs59990555 | chr12:48012593      | C1QL4:miR-27                               | C1QL4:miR-513    |
| rs36125542 | chr12:48780354      | SMARCD1:miR-223                            | SMARCD1:miR-223  |
| rs34307147 | chr12:48780369      | SMARCD1:miR-491                            | SMARCD1:miR-491  |
| rs34307147 | chr12:48780369      | SMARCD1:miR-491                            | SMARCD1:miR-650  |
| rs5798239  | chr12:51890837      | RARG:miR-331                               | RARG:miR-331     |
| rs5798239  | chr12:51890837      | RARG:miR-331                               | RARG:miR-518c*   |
| rs11554014 | chr12:52735990      | HOXC4:miR-26                               | HOXC4:miR-26a    |
| rs11554014 | chr12:52735990      | HOXC4:miR-26                               | HOXC4:miR-26b    |
| rs11554014 | chr12:52735990      | HOXC4:miR-26                               | HOXC4:miR-376a*  |
| rs11174462 | chr12:61085668      | USP15:miR-181:2                            | USP15:miR-369-3p |
| rs11174462 | chr12:61085668      | USP15:miR-181:2                            | USP15:miR-374    |
| rs11174462 | chr12:61085668      | USP15:miR-181:2                            | USP15:miR-655    |
| rs1042741  | chr12:64645530      | HMGA2:miR-7                                | HMGA2:miR-765    |
| rs1042742  | chr12:64645531      | HMGA2:miR-7                                | HMGA2:miR-765    |
| rs503881   | chr12:68259471      | FRS2:miR-145                               | FRS2:miR-569     |
| rs12813359 | chr12:69034753      | CNOT2:let-7/98                             | CNOT2:miR-202    |
| rs13599    | chr12:91061508      | BTG1:miR-93/291-3p/294/295/302/372/373/520 | BTG1:miR-372     |
| rs13599    | chr12:91061508      | BTG1:miR-93/291-3p/294/295/302/372/373/520 | BTG1:miR-93      |
| rs1053642  | chr12:92494062      | SOCS2:miR-194                              | SOCS2:miR-194    |
| rs1053642  | chr12:92494062      | SOCS2:miR-194                              | SOCS2:miR-199a*  |
| rs3730188  | chr12:101315989     | IGF1:miR-142-5p                            | IGF1:miR-142-5p  |
| rs3730188  | chr12:101315989     | IGF1:miR-142-5p                            | IGF1:miR-559     |
| rs3730188  | chr12:101315989     | IGF1:miR-142-5p                            | IGF1:miR-568     |
| rs3730223  | chr12:101319491     | IGF1:miR-495                               | IGF1:miR-410     |
| rs5031032  | chr12:101320262     | IGF1:miR-1/206                             | IGF1:miR-613     |
| rs5031032  | chr12:101320262     | IGF1:miR-409-3p                            | IGF1:miR-613     |
| rs1985752  | chr12:111431809     | PTPN11:miR-496                             | PTPN11:miR-496   |

Landes Bioscience.  
not distribute.

**Supplemental Table 5: Consensus SNPs in miRNA target sites**

| <b>SNP ID</b> | <b>SNP Position (hg18)</b> | <b>TargetScanS Prediction</b>   | <b>PITA Prediction</b> |
|---------------|----------------------------|---------------------------------|------------------------|
| rs9568845     | chr13:32576715             | STARD13:miR-130/301             | STARD13:miR-130a       |
| rs9568845     | chr13:32576715             | STARD13:miR-130/301             | STARD13:miR-130b       |
| rs9568845     | chr13:32576715             | STARD13:miR-130/301             | STARD13:miR-301        |
| rs9568845     | chr13:32576715             | STARD13:miR-130/301             | STARD13:miR-454-3p     |
| rs9568845     | chr13:32576715             | STARD13:miR-148/152             | STARD13:miR-130a       |
| rs9568845     | chr13:32576715             | STARD13:miR-148/152             | STARD13:miR-130b       |
| rs9568845     | chr13:32576715             | STARD13:miR-148/152             | STARD13:miR-301        |
| rs9568845     | chr13:32576715             | STARD13:miR-148/152             | STARD13:miR-454-3p     |
| rs45502300    | chr13:35144512             | NBEA:miR-190                    | NBEA:miR-190           |
| rs17226809    | chr13:38482916             | C13orf23:miR-29                 | C13orf23:miR-29a       |
| rs17226809    | chr13:38482916             | C13orf23:miR-29                 | C13orf23:miR-29b       |
| rs17226809    | chr13:38482916             | C13orf23:miR-29                 | C13orf23:miR-29c       |
| rs34241243    | chr13:40027924             | FOXO1A:miR-135                  | FOXO1A:miR-135a        |
| rs34241243    | chr13:40027924             | FOXO1A:miR-135                  | FOXO1A:miR-135b        |
| rs34241243    | chr13:40027924             | FOXO1A:miR-135                  | FOXO1A:miR-584         |
| rs17090557    | chr13:40281861             | SLC25A15:miR-125/351            | SLC25A15:miR-125a      |
| rs17090557    | chr13:40281861             | SLC25A15:miR-125/351            | SLC25A15:miR-125b      |
| rs17069218    | chr13:46306351             | HTR2A:miR-103/107               | HTR2A:miR-203          |
| rs3720        | chr13:49171604             | KPNA3:miR-141/200a              | KPNA3:miR-141          |
| rs3720        | chr13:49171604             | KPNA3:miR-141/200a              | KPNA3:miR-200a         |
| rs3720        | chr13:49171604             | KPNA3:miR-141/200a              | KPNA3:miR-429          |
| rs1043729     | chr13:49171832             | KPNA3:miR-19                    | KPNA3:miR-19a          |
| rs1043729     | chr13:49171832             | KPNA3:miR-19                    | KPNA3:miR-19b          |
| rs17073314    | chr13:49171834             | KPNA3:miR-19                    | KPNA3:miR-19a          |
| rs17073314    | chr13:49171834             | KPNA3:miR-19                    | KPNA3:miR-19b          |
| rs7446        | chr13:49173516             | KPNA3:miR-500                   | KPNA3:miR-217          |
| rs9805470     | chr13:50837391             | INTS6:miR-495:1                 | INTS6:miR-802          |
| rs41286098    | chr13:73166801             | KLF12:miR-542-3p                | KLF12:miR-542-3p       |
| rs1062733     | chr13:76477491             | FBXL3:miR-142-5p                | FBXL3:miR-542-3p       |
| rs1062733     | chr13:76477491             | FBXL3:miR-142-5p                | FBXL3:miR-573          |
| rs1062733     | chr13:76477491             | FBXL3:miR-17-5p/20/93/106/519.d | FBXL3:miR-542-3p       |
| rs1062733     | chr13:76477491             | FBXL3:miR-17-5p/20/93/106/519.d | FBXL3:miR-573          |
| rs59945183    | chr13:79024809             | NDFIP2:miR-135                  | NDFIP2:miR-522         |
| rs34421625    | chr13:87129243             | SLITRK5:miR-221/222             | SLITRK5:miR-142-5p     |
| rs61965610    | chr13:94077468             | GPR180:miR-25/32/92/363/367     | GPR180:miR-25          |
| rs61965610    | chr13:94077468             | GPR180:miR-25/32/92/363/367     | GPR180:miR-367         |
| rs61965610    | chr13:94077468             | GPR180:miR-25/32/92/363/367     | GPR180:miR-92          |

Supplemental Table 5: Consensus SNPs in miRNA target sites

| SNP ID     | SNP Position (hg18) | TargetScanS Prediction      | PITA Prediction   |
|------------|---------------------|-----------------------------|-------------------|
| rs61965610 | chr13:94077468      | GPR180:miR-25/32/92/363/367 | GPR180:miR-92b    |
| rs9556713  | chr13:96843159      | MBNL2:miR-181               | MBNL2:miR-181a    |
| rs9556713  | chr13:96843159      | MBNL2:miR-181               | MBNL2:miR-181c    |
| rs9556713  | chr13:96843159      | MBNL2:miR-496:2             | MBNL2:miR-181a    |
| rs9556713  | chr13:96843159      | MBNL2:miR-496:2             | MBNL2:miR-181c    |
| rs15004    | chr13:96844147      | MBNL2:miR-203.1:1           | MBNL2:miR-1       |
| rs15004    | chr13:96844147      | MBNL2:miR-203.1:1           | MBNL2:miR-203     |
| rs15004    | chr13:96844147      | MBNL2:miR-203.1:1           | MBNL2:miR-206     |
| rs12869870 | chr13:99415306      | ZIC5:miR-34/449             | ZIC5:miR-34a      |
| rs12869870 | chr13:99415306      | ZIC5:miR-34/449             | ZIC5:miR-34c      |
| rs12869870 | chr13:99415306      | ZIC5:miR-34/449             | ZIC5:miR-449      |
| rs12869870 | chr13:99415306      | ZIC5:miR-34/449             | ZIC5:miR-449b     |
| rs10555    | chr13:106619235     | LOC728215:miR-205           | LOC728215:miR-205 |
| rs1042762  | chr14:28308306      | FOXG1B:miR-34/449           | FOXG1B:miR-142-3p |
| rs1042762  | chr14:28308306      | FOXG1B:miR-34/449           | FOXG1B:miR-34a    |
| rs1042762  | chr14:28308306      | FOXG1B:miR-34/449           | FOXG1B:miR-34c    |
| rs1042762  | chr14:28308306      | FOXG1B:miR-34/449           | FOXG1B:miR-449    |
| rs1042762  | chr14:28308306      | FOXG1B:miR-34/449           | FOXG1B:miR-449b   |
| rs11152    | chr14:30639168      | HECTD1:miR-381              | HECTD1:miR-381    |
| rs11152    | chr14:30639168      | HECTD1:miR-381              | HECTD1:miR-524*   |
| rs1053667  | chr14:44612788      | KIAA0423:miR-130/301        | KIAA0423:miR-19a  |
| rs1053667  | chr14:44612788      | KIAA0423:miR-130/301        | KIAA0423:miR-19b  |
| rs1053667  | chr14:44612788      | KIAA0423:miR-19             | KIAA0423:miR-19a  |
| rs1053667  | chr14:44612788      | KIAA0423:miR-19             | KIAA0423:miR-19b  |
| rs1134761  | chr14:54011483      | GMFB:miR-145:2              | GMFB:miR-199a     |
| rs1134761  | chr14:54011483      | GMFB:miR-145:2              | GMFB:miR-199b     |
| rs45589533 | chr14:54605757      | C14orf32:miR-153            | C14orf32:miR-519a |
| rs45589533 | chr14:54605757      | C14orf32:miR-153            | C14orf32:miR-519b |
| rs45589533 | chr14:54605757      | C14orf32:miR-153            | C14orf32:miR-519c |
| rs17128429 | chr14:54889553      | FBXO34:miR-30-5p            | FBXO34:miR-30a-5p |
| rs17128429 | chr14:54889553      | FBXO34:miR-30-5p            | FBXO34:miR-30b    |
| rs17128429 | chr14:54889553      | FBXO34:miR-30-5p            | FBXO34:miR-30c    |
| rs17128429 | chr14:54889553      | FBXO34:miR-30-5p            | FBXO34:miR-30d    |
| rs17128429 | chr14:54889553      | FBXO34:miR-30-5p            | FBXO34:miR-30e-5p |
| rs57390094 | chr14:56337240      | OTX2:miR-448:2              | OTX2:miR-448      |
| rs17099190 | chr14:61283927      | HIF1A:miR-433-3p            | HIF1A:miR-433     |
| rs8019084  | chr14:61284203      | HIF1A:miR-135               | HIF1A:miR-135a    |

Supplemental Table 5: Consensus SNPs in miRNA target sites

| SNP ID     | SNP Position (hg18) | TargetScanS Prediction           | PITA Prediction  |
|------------|---------------------|----------------------------------|------------------|
| rs8019084  | chr14:61284203      | HIF1A:miR-135                    | HIF1A:miR-135b   |
| rs8019084  | chr14:61284203      | HIF1A:miR-135                    | HIF1A:miR-522    |
| rs45487994 | chr14:63221119      | SGPP1:miR-25/32/92/363/367       | SGPP1:miR-25     |
| rs45487994 | chr14:63221119      | SGPP1:miR-25/32/92/363/367       | SGPP1:miR-367    |
| rs45487994 | chr14:63221119      | SGPP1:miR-25/32/92/363/367       | SGPP1:miR-92     |
| rs45487994 | chr14:63221119      | SGPP1:miR-25/32/92/363/367       | SGPP1:miR-92b    |
| rs11557771 | chr14:68410996      | ACTN1:miR-218                    | ACTN1:miR-218    |
| rs3209273  | chr14:68411038      | ACTN1:miR-19                     | ACTN1:miR-19a    |
| rs3209273  | chr14:68411038      | ACTN1:miR-19                     | ACTN1:miR-19b    |
| rs45479600 | chr14:70651801      | PCNX:miR-200bc/429               | PCNX:miR-429     |
| rs11548716 | chr14:88692401      | FOXN3:miR-182                    | FOXN3:miR-182    |
| rs11548716 | chr14:88692401      | FOXN3:miR-96                     | FOXN3:miR-182    |
| rs15414    | chr14:89944277      | CALM1:miR-133                    | CALM1:miR-133a   |
| rs15414    | chr14:89944277      | CALM1:miR-133                    | CALM1:miR-133b   |
| rs15414    | chr14:89944277      | CALM1:miR-133                    | CALM1:miR-454-5p |
| rs17127097 | chr14:90407216      | RPS6KA5:miR-204/211              | RPS6KA5:miR-204  |
| rs17127097 | chr14:90407216      | RPS6KA5:miR-204/211              | RPS6KA5:miR-211  |
| rs35979920 | chr14:91505736      | TRIP11:miR-17-5p/20/93/106/519.d | TRIP11:miR-106a  |
| rs35979920 | chr14:91505736      | TRIP11:miR-17-5p/20/93/106/519.d | TRIP11:miR-106b  |
| rs35979920 | chr14:91505736      | TRIP11:miR-17-5p/20/93/106/519.d | TRIP11:miR-17-5p |
| rs35979920 | chr14:91505736      | TRIP11:miR-17-5p/20/93/106/519.d | TRIP11:miR-20a   |
| rs35979920 | chr14:91505736      | TRIP11:miR-17-5p/20/93/106/519.d | TRIP11:miR-20b   |
| rs61698538 | chr14:92777965      | BTBD7:miR-379                    | BTBD7:miR-509    |
| rs56033032 | chr14:96101306      | PAPOLA:miR-490                   | PAPOLA:miR-490   |
| rs56033032 | chr14:96101306      | PAPOLA:miR-490                   | PAPOLA:miR-619   |
| rs12147717 | chr14:96103097      | PAPOLA:miR-330                   | PAPOLA:miR-559   |
| rs35659612 | chr14:101759644     | WDR20:miR-369-3p                 | WDR20:miR-369-3p |
| rs35659612 | chr14:101759644     | WDR20:miR-369-3p                 | WDR20:miR-374    |
| rs35659612 | chr14:101759644     | WDR20:miR-369-3p                 | WDR20:miR-380-3p |
| rs35659612 | chr14:101759644     | WDR20:miR-374                    | WDR20:miR-369-3p |
| rs35659612 | chr14:101759644     | WDR20:miR-374                    | WDR20:miR-374    |
| rs35659612 | chr14:101759644     | WDR20:miR-374                    | WDR20:miR-380-3p |
| rs6478     | chr14:101759646     | WDR20:miR-369-3p                 | WDR20:miR-369-3p |
| rs6478     | chr14:101759646     | WDR20:miR-369-3p                 | WDR20:miR-374    |
| rs6478     | chr14:101759646     | WDR20:miR-369-3p                 | WDR20:miR-380-3p |
| rs6478     | chr14:101759646     | WDR20:miR-374                    | WDR20:miR-369-3p |
| rs6478     | chr14:101759646     | WDR20:miR-374                    | WDR20:miR-374    |



Supplemental Table 5: Consensus SNPs in miRNA target sites

| SNP ID     | SNP Position (hg18) | TargetScanS Prediction         | PITA Prediction   |
|------------|---------------------|--------------------------------|-------------------|
| rs6478     | chr14:101759646     | WDR20:miR-374                  | WDR20:miR-380-3p  |
| rs11704    | chr14:101878408     | C14orf131:miR-23               | C14orf131:miR-23a |
| rs11704    | chr14:101878408     | C14orf131:miR-23               | C14orf131:miR-23b |
| rs1059886  | chr15:32459510      | GOLGA8A:miR-25/32/92/363/367:1 | GOLGA8A:miR-139   |
| rs1059886  | chr15:32459510      | GOLGA8A:miR-25/32/92/363/367:1 | GOLGA8A:miR-25    |
| rs1059886  | chr15:32459510      | GOLGA8A:miR-25/32/92/363/367:1 | GOLGA8A:miR-27a   |
| rs1059886  | chr15:32459510      | GOLGA8A:miR-25/32/92/363/367:1 | GOLGA8A:miR-27b   |
| rs1059886  | chr15:32459510      | GOLGA8A:miR-25/32/92/363/367:1 | GOLGA8A:miR-367   |
| rs1059886  | chr15:32459510      | GOLGA8A:miR-25/32/92/363/367:1 | GOLGA8A:miR-92    |
| rs1059886  | chr15:32459510      | GOLGA8A:miR-25/32/92/363/367:1 | GOLGA8A:miR-92b   |
| rs4144689  | chr15:32606811      | GOLGA8B:miR-19                 | GOLGA8B:miR-527   |
| rs34368044 | chr15:41022788      | UBR1:miR-142-5p                | UBR1:miR-559      |
| rs34368044 | chr15:41022788      | UBR1:miR-142-5p                | UBR1:miR-573      |
| rs34368044 | chr15:41022788      | UBR1:miR-17-5p/20/93/106/519.d | UBR1:miR-559      |
| rs34368044 | chr15:41022788      | UBR1:miR-17-5p/20/93/106/519.d | UBR1:miR-573      |
| rs3209488  | chr15:41850875      | PDIA3:miR-148/152              | PDIA3:miR-553     |
| rs58383159 | chr15:45852767      | SEMA6D:miR-1/206               | SEMA6D:miR-613    |
| rs58383159 | chr15:45852767      | SEMA6D:miR-409-3p              | SEMA6D:miR-613    |
| rs16976737 | chr15:54171090      | RFXDC2:miR-377                 | RFXDC2:miR-154*   |
| rs16976737 | chr15:54171090      | RFXDC2:miR-377                 | RFXDC2:miR-487a   |
| rs3751539  | chr15:57175505      | RNF111:miR-128                 | RNF111:miR-27a    |
| rs3751539  | chr15:57175505      | RNF111:miR-128                 | RNF111:miR-27b    |
| rs3751539  | chr15:57175505      | RNF111:miR-144:2               | RNF111:miR-27a    |
| rs3751539  | chr15:57175505      | RNF111:miR-144:2               | RNF111:miR-27b    |
| rs3751539  | chr15:57175505      | RNF111:miR-27:2                | RNF111:miR-27a    |
| rs3751539  | chr15:57175505      | RNF111:miR-27:2                | RNF111:miR-27b    |
| rs58293779 | chr15:60920161      | TLN2:miR-200bc/429             | TLN2:miR-374      |
| rs62012486 | chr15:63196809      | PDCD7:miR-410                  | PDCD7:miR-410     |
| rs62012486 | chr15:63196809      | PDCD7:miR-410                  | PDCD7:miR-620     |
| rs45615538 | chr15:64861144      | SMAD6:miR-25/32/92/363/367     | SMAD6:miR-25      |
| rs45615538 | chr15:64861144      | SMAD6:miR-25/32/92/363/367     | SMAD6:miR-367     |
| rs45615538 | chr15:64861144      | SMAD6:miR-25/32/92/363/367     | SMAD6:miR-767-5p  |
| rs45615538 | chr15:64861144      | SMAD6:miR-25/32/92/363/367     | SMAD6:miR-92      |
| rs45615538 | chr15:64861144      | SMAD6:miR-25/32/92/363/367     | SMAD6:miR-92b     |
| rs61628540 | chr15:70831616      | ADPGK:miR-1/206                | ADPGK:miR-1       |
| rs61628540 | chr15:70831616      | ADPGK:miR-1/206                | ADPGK:miR-206     |
| rs61628540 | chr15:70831616      | ADPGK:miR-1/206                | ADPGK:miR-455     |

Supplemental Table 5: Consensus SNPs in miRNA target sites

| SNP ID     | SNP Position (hg18) | TargetScanS Prediction          | PITA Prediction  |
|------------|---------------------|---------------------------------|------------------|
| rs1043589  | chr15:71639527      | NPTN:miR-146                    | NPTN:miR-146a    |
| rs1043589  | chr15:71639527      | NPTN:miR-146                    | NPTN:miR-146b    |
| rs2071501  | chr15:72882210      | CSK:miR-216                     | CSK:miR-216      |
| rs2071501  | chr15:72882210      | CSK:miR-216                     | CSK:miR-583      |
| rs1062752  | chr15:76977041      | MORF4L1:miR-33                  | MORF4L1:miR-33   |
| rs1062752  | chr15:76977041      | MORF4L1:miR-33                  | MORF4L1:miR-33b  |
| rs1062752  | chr15:76977041      | MORF4L1:miR-33                  | MORF4L1:miR-586  |
| rs1042499  | chr15:88129309      | ANPEP:miR-125/351               | ANPEP:miR-125a   |
| rs1042499  | chr15:88129309      | ANPEP:miR-125/351               | ANPEP:miR-125b   |
| rs1042499  | chr15:88129309      | ANPEP:miR-125/351               | ANPEP:miR-516-3p |
| rs12148341 | chr15:88424595      | ZNF710:let-7/98                 | ZNF710:let-7e    |
| rs1802604  | chr15:99274190      | ALDH1A3:miR-101                 | ALDH1A3:miR-144  |
| rs1802604  | chr15:99274190      | ALDH1A3:miR-101                 | ALDH1A3:miR-656  |
| rs1802604  | chr15:99274190      | ALDH1A3:miR-144                 | ALDH1A3:miR-144  |
| rs1802604  | chr15:99274190      | ALDH1A3:miR-144                 | ALDH1A3:miR-656  |
| rs7187345  | chr16:3953930       | ADCY9:miR-7                     | ADCY9:miR-7      |
| rs35715530 | chr16:15597464      | KIAA0430:miR-124.2/506          | LKAP:miR-124a    |
| rs12907    | chr16:15726154      | NDE1:miR-28                     | NDE1:miR-558     |
| rs3380     | chr16:24133766      | PRKCB1:miR-494                  | PRKCB1:miR-141   |
| rs3380     | chr16:24133766      | PRKCB1:miR-494                  | PRKCB1:miR-200a  |
| rs3380     | chr16:24133766      | PRKCB1:miR-494                  | PRKCB1:miR-429   |
| rs3837785  | chr16:24134462      | PRKCB1:miR-129-5p               | PRKCB1:miR-129   |
| rs3837785  | chr16:24134462      | PRKCB1:miR-450                  | PRKCB1:miR-129   |
| rs1062379  | chr16:29989207      | ALDOA:miR-34/449                | ALDOA:miR-34a    |
| rs1062379  | chr16:29989207      | ALDOA:miR-34/449                | ALDOA:miR-34c    |
| rs1062379  | chr16:29989207      | ALDOA:miR-34/449                | ALDOA:miR-449    |
| rs1062379  | chr16:29989207      | ALDOA:miR-34/449                | ALDOA:miR-449b   |
| rs34494127 | chr16:30588903      | FBS1:miR-493-5p                 | FBRS:miR-493-5p  |
| rs1054478  | chr16:49727522      | SALL1:miR-17-5p/20/93/106/519.d | SALL1:miR-18a    |
| rs1054478  | chr16:49727522      | SALL1:miR-17-5p/20/93/106/519.d | SALL1:miR-18b    |
| rs1054478  | chr16:49727522      | SALL1:miR-17-5p/20/93/106/519.d | SALL1:miR-519a   |
| rs1054478  | chr16:49727522      | SALL1:miR-17-5p/20/93/106/519.d | SALL1:miR-519b   |
| rs1054478  | chr16:49727522      | SALL1:miR-17-5p/20/93/106/519.d | SALL1:miR-519c   |
| rs1799839  | chr16:54097153      | MMP2:miR-29                     | MMP2:miR-593     |
| rs1799839  | chr16:54097153      | MMP2:miR-29                     | MMP2:miR-624     |
| rs9927827  | chr16:65691603      | CBFB:miR-365                    | CBFB:miR-155     |
| rs7203660  | chr16:66949983      | SMPD3:miR-144                   | SMPD3:miR-633    |

**Supplemental Table 5: Consensus SNPs in miRNA target sites**

| <b>SNP ID</b> | <b>SNP Position (hg18)</b> | <b>TargetScanS Prediction</b>                | <b>PITA Prediction</b> |
|---------------|----------------------------|----------------------------------------------|------------------------|
| rs3169307     | chr16:67709509             | CTF8:miR-128                                 | CTF8:miR-128a          |
| rs3169307     | chr16:67709509             | CTF8:miR-128                                 | CTF8:miR-128b          |
| rs1053412     | chr16:71374408             | ATBF1:miR-542-3p                             | ATBF1:miR-542-3p       |
| rs3841241     | chr16:71376466             | ATBF1:miR-494:1                              | ATBF1:miR-494          |
| rs16974598    | chr16:83370524             | USP10:miR-138                                | USP10:miR-138          |
| rs11544837    | chr16:84264538             | KIAA0182:miR-495                             | KIAA0182:miR-495       |
| rs1064245     | chr17:591736               | FAM57A:miR-17-5p/20/93/106/519.d             | FAM57A:miR-106a        |
| rs1064245     | chr17:591736               | FAM57A:miR-17-5p/20/93/106/519.d             | FAM57A:miR-106b        |
| rs1064245     | chr17:591736               | FAM57A:miR-17-5p/20/93/106/519.d             | FAM57A:miR-17-5p       |
| rs1064245     | chr17:591736               | FAM57A:miR-17-5p/20/93/106/519.d             | FAM57A:miR-20a         |
| rs1064245     | chr17:591736               | FAM57A:miR-17-5p/20/93/106/519.d             | FAM57A:miR-20b         |
| rs1064245     | chr17:591736               | FAM57A:miR-17-5p/20/93/106/519.d             | FAM57A:miR-302a        |
| rs1064245     | chr17:591736               | FAM57A:miR-17-5p/20/93/106/519.d             | FAM57A:miR-302b        |
| rs1064245     | chr17:591736               | FAM57A:miR-17-5p/20/93/106/519.d             | FAM57A:miR-302c        |
| rs1064245     | chr17:591736               | FAM57A:miR-17-5p/20/93/106/519.d             | FAM57A:miR-302d        |
| rs1064245     | chr17:591736               | FAM57A:miR-17-5p/20/93/106/519.d             | FAM57A:miR-373         |
| rs1064245     | chr17:591736               | FAM57A:miR-17-5p/20/93/106/519.d             | FAM57A:miR-450         |
| rs1064245     | chr17:591736               | FAM57A:miR-17-5p/20/93/106/519.d             | FAM57A:miR-520a        |
| rs1064245     | chr17:591736               | FAM57A:miR-17-5p/20/93/106/519.d             | FAM57A:miR-520b        |
| rs1064245     | chr17:591736               | FAM57A:miR-17-5p/20/93/106/519.d             | FAM57A:miR-520c        |
| rs1064245     | chr17:591736               | FAM57A:miR-17-5p/20/93/106/519.d             | FAM57A:miR-520d        |
| rs1064245     | chr17:591736               | FAM57A:miR-17-5p/20/93/106/519.d             | FAM57A:miR-520e        |
| rs1064245     | chr17:591736               | FAM57A:miR-17-5p/20/93/106/519.d             | FAM57A:miR-526b*       |
| rs1064245     | chr17:591736               | FAM57A:miR-93/291-3p/294/295/302/372/373/520 | FAM57A:miR-106a        |
| rs1064245     | chr17:591736               | FAM57A:miR-93/291-3p/294/295/302/372/373/520 | FAM57A:miR-106b        |
| rs1064245     | chr17:591736               | FAM57A:miR-93/291-3p/294/295/302/372/373/520 | FAM57A:miR-17-5p       |
| rs1064245     | chr17:591736               | FAM57A:miR-93/291-3p/294/295/302/372/373/520 | FAM57A:miR-20a         |
| rs1064245     | chr17:591736               | FAM57A:miR-93/291-3p/294/295/302/372/373/520 | FAM57A:miR-20b         |
| rs1064245     | chr17:591736               | FAM57A:miR-93/291-3p/294/295/302/372/373/520 | FAM57A:miR-302a        |
| rs1064245     | chr17:591736               | FAM57A:miR-93/291-3p/294/295/302/372/373/520 | FAM57A:miR-302b        |
| rs1064245     | chr17:591736               | FAM57A:miR-93/291-3p/294/295/302/372/373/520 | FAM57A:miR-302c        |
| rs1064245     | chr17:591736               | FAM57A:miR-93/291-3p/294/295/302/372/373/520 | FAM57A:miR-302d        |
| rs1064245     | chr17:591736               | FAM57A:miR-93/291-3p/294/295/302/372/373/520 | FAM57A:miR-373         |
| rs1064245     | chr17:591736               | FAM57A:miR-93/291-3p/294/295/302/372/373/520 | FAM57A:miR-450         |
| rs1064245     | chr17:591736               | FAM57A:miR-93/291-3p/294/295/302/372/373/520 | FAM57A:miR-520a        |
| rs1064245     | chr17:591736               | FAM57A:miR-93/291-3p/294/295/302/372/373/520 | FAM57A:miR-520b        |
| rs1064245     | chr17:591736               | FAM57A:miR-93/291-3p/294/295/302/372/373/520 | FAM57A:miR-520c        |

Supplemental Table 5: Consensus SNPs in miRNA target sites

| SNP ID     | SNP Position (hg18) | TargetScanS Prediction                       | PITA Prediction   |
|------------|---------------------|----------------------------------------------|-------------------|
| rs1064245  | chr17:591736        | FAM57A:miR-93/291-3p/294/295/302/372/373/520 | FAM57A:miR-520d   |
| rs1064245  | chr17:591736        | FAM57A:miR-93/291-3p/294/295/302/372/373/520 | FAM57A:miR-520e   |
| rs1064245  | chr17:591736        | FAM57A:miR-93/291-3p/294/295/302/372/373/520 | FAM57A:miR-526b*  |
| rs2233658  | chr17:4789820       | PFN1:miR-140                                 | PFN1:miR-140      |
| rs3177209  | chr17:7084472       | GABARAP:miR-140                              | GABARAP:miR-140   |
| rs1133249  | chr17:7415883       | SENP3:miR-410                                | SENP3:miR-568     |
| rs58537439 | chr17:7415883       | SENP3:miR-410                                | SENP3:miR-568     |
| rs58805209 | chr17:7415885       | SENP3:miR-410                                | SENP3:miR-568     |
| rs1048750  | chr17:7984600       | PER1:miR-146                                 | PER1:miR-580      |
| rs1048750  | chr17:7984600       | PER1:miR-146                                 | PER1:miR-614      |
| rs1051780  | chr17:8003781       | VAMP2:miR-34/449:1                           | VAMP2:miR-34b     |
| rs1051780  | chr17:8003781       | VAMP2:miR-34b                                | VAMP2:miR-34b     |
| rs1077790  | chr17:17338614      | RASD1:miR-130/301                            | RASD1:miR-18a     |
| rs1077790  | chr17:17338614      | RASD1:miR-130/301                            | RASD1:miR-18b     |
| rs1077790  | chr17:17338614      | RASD1:miR-17-5p/20/93/106/519.d              | RASD1:miR-18a     |
| rs1077790  | chr17:17338614      | RASD1:miR-17-5p/20/93/106/519.d              | RASD1:miR-18b     |
| rs9914083  | chr17:17687821      | TOM1L2:miR-19                                | TOM1L2:miR-19a    |
| rs9914083  | chr17:17687821      | TOM1L2:miR-19                                | TOM1L2:miR-19b    |
| rs10648639 | chr17:17910490      | C17orf39:miR-182                             | C17orf39:miR-521  |
| rs10648639 | chr17:17910490      | C17orf39:miR-96                              | C17orf39:miR-521  |
| rs56295612 | chr17:24977271      | SSH2:miR-421                                 | SSH2:miR-105      |
| rs56295612 | chr17:24977271      | SSH2:miR-421                                 | SSH2:miR-519e     |
| rs1044675  | chr17:35330858      | ORMDL3:miR-200bc/429                         | ORMDL3:miR-429    |
| rs11550320 | chr17:37100703      | EIF1:miR-381                                 | EIF1:miR-656      |
| rs5001709  | chr17:37134071      | HAP1:miR-328                                 | HAP1:miR-339      |
| rs5001709  | chr17:37134071      | HAP1:miR-339                                 | HAP1:miR-339      |
| rs1802740  | chr17:37531149      | RAB5C:miR-18                                 | RAB5C:miR-18a     |
| rs1802740  | chr17:37531149      | RAB5C:miR-18                                 | RAB5C:miR-18b     |
| rs34694406 | chr17:37605734      | STAT5B:miR-141/200a:2                        | STAT5B:miR-330    |
| rs1051166  | chr17:37985114      | LOC162427:miR-128:2                          | LOC162427:miR-27a |
| rs1051166  | chr17:37985114      | LOC162427:miR-128:2                          | LOC162427:miR-27b |
| rs1051166  | chr17:37985114      | LOC162427:miR-27                             | LOC162427:miR-27a |
| rs1051166  | chr17:37985114      | LOC162427:miR-27                             | LOC162427:miR-27b |
| rs36087185 | chr17:39441544      | NAGS:miR-135                                 | NAGS:miR-135a     |
| rs36087185 | chr17:39441544      | NAGS:miR-135                                 | NAGS:miR-135b     |
| rs35468252 | chr17:39469019      | LSM12:miR-188                                | LSM12:miR-642     |
| rs1136638  | chr17:43115445      | KPNB1:miR-218                                | KPNB1:miR-581     |

Supplemental Table 5: Consensus SNPs in miRNA target sites

| SNP ID     | SNP Position (hg18) | TargetScanS Prediction        | PITA Prediction |
|------------|---------------------|-------------------------------|-----------------|
| rs4793924  | chr17:53405033      | VEZF1:miR-1/206               | ZNF161:miR-122a |
| rs1051424  | chr17:55379106      | RPS6KB1:miR-129-5p            | RPS6KB1:miR-129 |
| rs1051424  | chr17:55379106      | RPS6KB1:miR-129-5p            | RPS6KB1:miR-507 |
| rs1051424  | chr17:55379106      | RPS6KB1:miR-363:1             | RPS6KB1:miR-129 |
| rs1051424  | chr17:55379106      | RPS6KB1:miR-363:1             | RPS6KB1:miR-507 |
| rs1051424  | chr17:55379106      | RPS6KB1:miR-450               | RPS6KB1:miR-129 |
| rs1051424  | chr17:55379106      | RPS6KB1:miR-450               | RPS6KB1:miR-507 |
| rs1051424  | chr17:55379106      | RPS6KB1:miR-500               | RPS6KB1:miR-129 |
| rs1051424  | chr17:55379106      | RPS6KB1:miR-500               | RPS6KB1:miR-507 |
| rs1044519  | chr17:57378383      | THRAP1:miR-369-3p:1           | THRAP1:miR-374  |
| rs1044519  | chr17:57378383      | THRAP1:miR-374                | THRAP1:miR-374  |
| rs57140103 | chr17:65684605      | KCNJ2:miR-193                 | KCNJ2:miR-193a  |
| rs11555392 | chr17:67634027      | SOX9:miR-495                  | SOX9:miR-495    |
| rs34511924 | chr17:70643677      | HN1:miR-142-5p                | HN1:miR-148b    |
| rs34511924 | chr17:70643677      | HN1:miR-142-5p                | HN1:miR-152     |
| rs34511924 | chr17:70643677      | HN1:miR-17-5p/20/93/106/519.d | HN1:miR-148b    |
| rs34511924 | chr17:70643677      | HN1:miR-17-5p/20/93/106/519.d | HN1:miR-152     |
| rs3178287  | chr17:70643683      | HN1:miR-142-5p                | HN1:miR-106a    |
| rs3178287  | chr17:70643683      | HN1:miR-142-5p                | HN1:miR-106b    |
| rs3178287  | chr17:70643683      | HN1:miR-142-5p                | HN1:miR-17-5p   |
| rs3178287  | chr17:70643683      | HN1:miR-142-5p                | HN1:miR-20a     |
| rs3178287  | chr17:70643683      | HN1:miR-142-5p                | HN1:miR-20b     |
| rs3178287  | chr17:70643683      | HN1:miR-142-5p                | HN1:miR-302a    |
| rs3178287  | chr17:70643683      | HN1:miR-142-5p                | HN1:miR-302b    |
| rs3178287  | chr17:70643683      | HN1:miR-142-5p                | HN1:miR-302c    |
| rs3178287  | chr17:70643683      | HN1:miR-142-5p                | HN1:miR-302d    |
| rs3178287  | chr17:70643683      | HN1:miR-142-5p                | HN1:miR-373     |
| rs3178287  | chr17:70643683      | HN1:miR-142-5p                | HN1:miR-520a    |
| rs3178287  | chr17:70643683      | HN1:miR-142-5p                | HN1:miR-520b    |
| rs3178287  | chr17:70643683      | HN1:miR-142-5p                | HN1:miR-520c    |
| rs3178287  | chr17:70643683      | HN1:miR-142-5p                | HN1:miR-520d    |
| rs3178287  | chr17:70643683      | HN1:miR-142-5p                | HN1:miR-520e    |
| rs3178287  | chr17:70643683      | HN1:miR-142-5p                | HN1:miR-520f    |
| rs3178287  | chr17:70643683      | HN1:miR-142-5p                | HN1:miR-526b*   |
| rs3178287  | chr17:70643683      | HN1:miR-17-5p/20/93/106/519.d | HN1:miR-106a    |
| rs3178287  | chr17:70643683      | HN1:miR-17-5p/20/93/106/519.d | HN1:miR-106b    |
| rs3178287  | chr17:70643683      | HN1:miR-17-5p/20/93/106/519.d | HN1:miR-17-5p   |

**Supplemental Table 5: Consensus SNPs in miRNA target sites**

| <b>SNP ID</b> | <b>SNP Position (hg18)</b> | <b>TargetScanS Prediction</b>             | <b>PITA Prediction</b> |
|---------------|----------------------------|-------------------------------------------|------------------------|
| rs3178287     | chr17:70643683             | HN1:miR-17-5p/20/93/106/519.d             | HN1:miR-20a            |
| rs3178287     | chr17:70643683             | HN1:miR-17-5p/20/93/106/519.d             | HN1:miR-20b            |
| rs3178287     | chr17:70643683             | HN1:miR-17-5p/20/93/106/519.d             | HN1:miR-302a           |
| rs3178287     | chr17:70643683             | HN1:miR-17-5p/20/93/106/519.d             | HN1:miR-302b           |
| rs3178287     | chr17:70643683             | HN1:miR-17-5p/20/93/106/519.d             | HN1:miR-302c           |
| rs3178287     | chr17:70643683             | HN1:miR-17-5p/20/93/106/519.d             | HN1:miR-302d           |
| rs3178287     | chr17:70643683             | HN1:miR-17-5p/20/93/106/519.d             | HN1:miR-373            |
| rs3178287     | chr17:70643683             | HN1:miR-17-5p/20/93/106/519.d             | HN1:miR-520a           |
| rs3178287     | chr17:70643683             | HN1:miR-17-5p/20/93/106/519.d             | HN1:miR-520b           |
| rs3178287     | chr17:70643683             | HN1:miR-17-5p/20/93/106/519.d             | HN1:miR-520c           |
| rs3178287     | chr17:70643683             | HN1:miR-17-5p/20/93/106/519.d             | HN1:miR-520d           |
| rs3178287     | chr17:70643683             | HN1:miR-17-5p/20/93/106/519.d             | HN1:miR-520e           |
| rs3178287     | chr17:70643683             | HN1:miR-17-5p/20/93/106/519.d             | HN1:miR-520f           |
| rs3178287     | chr17:70643683             | HN1:miR-17-5p/20/93/106/519.d             | HN1:miR-526b*          |
| rs3178287     | chr17:70643683             | HN1:miR-93/291-3p/294/295/302/372/373/520 | HN1:miR-106a           |
| rs3178287     | chr17:70643683             | HN1:miR-93/291-3p/294/295/302/372/373/520 | HN1:miR-106b           |
| rs3178287     | chr17:70643683             | HN1:miR-93/291-3p/294/295/302/372/373/520 | HN1:miR-17-5p          |
| rs3178287     | chr17:70643683             | HN1:miR-93/291-3p/294/295/302/372/373/520 | HN1:miR-20a            |
| rs3178287     | chr17:70643683             | HN1:miR-93/291-3p/294/295/302/372/373/520 | HN1:miR-20b            |
| rs3178287     | chr17:70643683             | HN1:miR-93/291-3p/294/295/302/372/373/520 | HN1:miR-302a           |
| rs3178287     | chr17:70643683             | HN1:miR-93/291-3p/294/295/302/372/373/520 | HN1:miR-302b           |
| rs3178287     | chr17:70643683             | HN1:miR-93/291-3p/294/295/302/372/373/520 | HN1:miR-302c           |
| rs3178287     | chr17:70643683             | HN1:miR-93/291-3p/294/295/302/372/373/520 | HN1:miR-302d           |
| rs3178287     | chr17:70643683             | HN1:miR-93/291-3p/294/295/302/372/373/520 | HN1:miR-373            |
| rs3178287     | chr17:70643683             | HN1:miR-93/291-3p/294/295/302/372/373/520 | HN1:miR-520a           |
| rs3178287     | chr17:70643683             | HN1:miR-93/291-3p/294/295/302/372/373/520 | HN1:miR-520b           |
| rs3178287     | chr17:70643683             | HN1:miR-93/291-3p/294/295/302/372/373/520 | HN1:miR-520c           |
| rs3178287     | chr17:70643683             | HN1:miR-93/291-3p/294/295/302/372/373/520 | HN1:miR-520d           |
| rs3178287     | chr17:70643683             | HN1:miR-93/291-3p/294/295/302/372/373/520 | HN1:miR-520e           |
| rs3178287     | chr17:70643683             | HN1:miR-93/291-3p/294/295/302/372/373/520 | HN1:miR-520f           |
| rs3178287     | chr17:70643683             | HN1:miR-93/291-3p/294/295/302/372/373/520 | HN1:miR-526b*          |
| rs3073415     | chr17:71285962             | H3F3B:miR-10                              | H3F3B:miR-10a          |
| rs3073415     | chr17:71285962             | H3F3B:miR-10                              | H3F3B:miR-10b          |
| rs3073415     | chr17:71285962             | H3F3B:miR-486                             | H3F3B:miR-10a          |
| rs3073415     | chr17:71285962             | H3F3B:miR-486                             | H3F3B:miR-10b          |
| rs59650175    | chr17:75421687             | CBX4:miR-129-5p                           | CBX4:miR-129           |
| rs59650175    | chr17:75421687             | CBX4:miR-129-5p                           | CBX4:miR-557           |

Supplemental Table 5: Consensus SNPs in miRNA target sites

| SNP ID     | SNP Position (hg18) | TargetScanS Prediction           | PITA Prediction  |
|------------|---------------------|----------------------------------|------------------|
| rs59650175 | chr17:75421687      | CBX4:miR-363                     | CBX4:miR-129     |
| rs59650175 | chr17:75421687      | CBX4:miR-363                     | CBX4:miR-557     |
| rs59650175 | chr17:75421687      | CBX4:miR-450                     | CBX4:miR-129     |
| rs59650175 | chr17:75421687      | CBX4:miR-450                     | CBX4:miR-557     |
| rs1140892  | chr17:77091951      | ACTG1:miR-10                     | ACTG1:miR-10a    |
| rs1140892  | chr17:77091951      | ACTG1:miR-10                     | ACTG1:miR-10b    |
| rs56201915 | chr17:77092121      | ACTG1:miR-381:2                  | ACTG1:miR-381    |
| rs11549163 | chr17:77092126      | ACTG1:miR-381:2                  | ACTG1:miR-381    |
| rs14462    | chr18:16784002      | ROCK1:miR-323                    | ROCK1:miR-323    |
| rs9950418  | chr18:30722110      | DTNA:miR-19:1                    | DTNA:miR-527     |
| rs1801938  | chr19:2052071       | AP3D1:miR-1/206                  | AP3D1:miR-409-3p |
| rs1801938  | chr19:2052071       | AP3D1:miR-1/206                  | AP3D1:miR-613    |
| rs1801940  | chr19:2052165       | AP3D1:miR-17-5p/20/93/106/519.d  | AP3D1:miR-573    |
| rs1801940  | chr19:2052165       | AP3D1:miR-542-3p                 | AP3D1:miR-573    |
| rs1049232  | chr19:6702293       | TRIP10:miR-17-5p/20/93/106/519.d | TRIP10:miR-18a   |
| rs1049232  | chr19:6702293       | TRIP10:miR-17-5p/20/93/106/519.d | TRIP10:miR-18b   |
| rs1049232  | chr19:6702293       | TRIP10:miR-17-5p/20/93/106/519.d | TRIP10:miR-519a  |
| rs1049232  | chr19:6702293       | TRIP10:miR-17-5p/20/93/106/519.d | TRIP10:miR-519b  |
| rs1049232  | chr19:6702293       | TRIP10:miR-17-5p/20/93/106/519.d | TRIP10:miR-519c  |
| rs2307000  | chr19:7835531       | EVI5L:miR-182                    | EVI5L:miR-96     |
| rs2307000  | chr19:7835531       | EVI5L:miR-96                     | EVI5L:miR-96     |
| rs45587445 | chr19:10439915      | PDE4A:miR-7                      | PDE4A:miR-7      |
| rs56214729 | chr19:11425661      | ELAVL3:miR-129-5p:2              | ELAVL3:miR-511   |
| rs11555160 | chr19:15218942      | BRD4:miR-493-5p                  | BRD4:miR-524*    |
| rs11555160 | chr19:15218942      | BRD4:miR-493-5p                  | BRD4:miR-568     |
| rs3218074  | chr19:35007016      | CCNE1:miR-15/16/195/424/497:2    | CCNE1:miR-15a    |
| rs3218074  | chr19:35007016      | CCNE1:miR-15/16/195/424/497:2    | CCNE1:miR-15b    |
| rs3218074  | chr19:35007016      | CCNE1:miR-15/16/195/424/497:2    | CCNE1:miR-16     |
| rs3218074  | chr19:35007016      | CCNE1:miR-15/16/195/424/497:2    | CCNE1:miR-195    |
| rs3218074  | chr19:35007016      | CCNE1:miR-15/16/195/424/497:2    | CCNE1:miR-497    |
| rs3218074  | chr19:35007016      | CCNE1:miR-503:2                  | CCNE1:miR-15a    |
| rs3218074  | chr19:35007016      | CCNE1:miR-503:2                  | CCNE1:miR-15b    |
| rs3218074  | chr19:35007016      | CCNE1:miR-503:2                  | CCNE1:miR-16     |
| rs3218074  | chr19:35007016      | CCNE1:miR-503:2                  | CCNE1:miR-195    |
| rs3218074  | chr19:35007016      | CCNE1:miR-503:2                  | CCNE1:miR-497    |
| rs1044041  | chr19:39410783      | LSM14A:miR-381:1                 | LSM14A:miR-381   |
| rs1802473  | chr19:39652609      | SAE2:miR-133                     | UBA2:miR-659     |

Supplemental Table 5: Consensus SNPs in miRNA target sites

| SNP ID     | SNP Position (hg18) | TargetScanS Prediction            | PITA Prediction   |
|------------|---------------------|-----------------------------------|-------------------|
| rs10561    | chr19:40462485      | USF2:miR-186                      | USF2:miR-587      |
| rs1056976  | chr20:412502        | CSNK2A1:miR-411                   | CSNK2A1:miR-564   |
| rs3209499  | chr20:2077179       | STK35:miR-135                     | STK35:miR-135a    |
| rs3209499  | chr20:2077179       | STK35:miR-135                     | STK35:miR-135b    |
| rs16435    | chr20:23303456      | NAPB:miR-200bc/429                | NAPB:miR-200b     |
| rs16435    | chr20:23303456      | NAPB:miR-200bc/429                | NAPB:miR-200c     |
| rs16435    | chr20:23303456      | NAPB:miR-200bc/429                | NAPB:miR-429      |
| rs11467962 | chr20:23303457      | NAPB:miR-200bc/429                | NAPB:miR-200b     |
| rs11467962 | chr20:23303457      | NAPB:miR-200bc/429                | NAPB:miR-200c     |
| rs11467962 | chr20:23303457      | NAPB:miR-200bc/429                | NAPB:miR-429      |
| rs3208684  | chr20:29716466      | BCL2L1:let-7/98                   | BCL2L1:let-7e     |
| rs3208684  | chr20:29716466      | BCL2L1:let-7/98                   | BCL2L1:miR-491    |
| rs34271817 | chr20:30489193      | ASXL1:miR-7                       | ASXL1:miR-608     |
| rs34271817 | chr20:30489193      | ASXL1:miR-7                       | ASXL1:miR-7       |
| rs62206361 | chr20:35584875      | NNAT:miR-488                      | NNAT:miR-383      |
| rs2664575  | chr20:47295885      | ZNFX1:miR-153                     | ZNFX1:miR-153     |
| rs2664575  | chr20:47295885      | ZNFX1:miR-153                     | ZNFX1:miR-18a     |
| rs2664575  | chr20:47295885      | ZNFX1:miR-153                     | ZNFX1:miR-18b     |
| rs2664575  | chr20:47295885      | ZNFX1:miR-153                     | ZNFX1:miR-519a    |
| rs2664575  | chr20:47295885      | ZNFX1:miR-153                     | ZNFX1:miR-519b    |
| rs2664575  | chr20:47295885      | ZNFX1:miR-153                     | ZNFX1:miR-519c    |
| rs2664575  | chr20:47295885      | ZNFX1:miR-17-5p/20/93/106/519.d:2 | ZNFX1:miR-153     |
| rs2664575  | chr20:47295885      | ZNFX1:miR-17-5p/20/93/106/519.d:2 | ZNFX1:miR-18a     |
| rs2664575  | chr20:47295885      | ZNFX1:miR-17-5p/20/93/106/519.d:2 | ZNFX1:miR-18b     |
| rs2664575  | chr20:47295885      | ZNFX1:miR-17-5p/20/93/106/519.d:2 | ZNFX1:miR-519a    |
| rs2664575  | chr20:47295885      | ZNFX1:miR-17-5p/20/93/106/519.d:2 | ZNFX1:miR-519b    |
| rs2664575  | chr20:47295885      | ZNFX1:miR-17-5p/20/93/106/519.d:2 | ZNFX1:miR-519c    |
| rs6067490  | chr20:48633727      | PTPN1:miR-1/206                   | PTPN1:miR-613     |
| rs11469346 | chr20:48803014      | PARD6B:let-7/98                   | PARD6B:let-7a     |
| rs11469346 | chr20:48803014      | PARD6B:let-7/98                   | PARD6B:let-7b     |
| rs11469346 | chr20:48803014      | PARD6B:let-7/98                   | PARD6B:let-7c     |
| rs11469346 | chr20:48803014      | PARD6B:let-7/98                   | PARD6B:let-7d     |
| rs11469346 | chr20:48803014      | PARD6B:let-7/98                   | PARD6B:let-7f     |
| rs11469346 | chr20:48803014      | PARD6B:let-7/98                   | PARD6B:let-7g     |
| rs11469346 | chr20:48803014      | PARD6B:let-7/98                   | PARD6B:let-7i     |
| rs11469346 | chr20:48803014      | PARD6B:let-7/98                   | PARD6B:miR-98     |
| rs6128327  | chr20:56375963      | RAB22A:miR-30-5p                  | RAB22A:miR-30a-5p |

Landes Bioscience.  
not distribute.



Supplemental Table 5: Consensus SNPs in miRNA target sites

| SNP ID     | SNP Position (hg18) | TargetScanS Prediction                     | PITA Prediction   |
|------------|---------------------|--------------------------------------------|-------------------|
| rs6128327  | chr20:56375963      | RAB22A:miR-30-5p                           | RAB22A:miR-30b    |
| rs6128327  | chr20:56375963      | RAB22A:miR-30-5p                           | RAB22A:miR-30c    |
| rs6128327  | chr20:56375963      | RAB22A:miR-30-5p                           | RAB22A:miR-30d    |
| rs6128327  | chr20:56375963      | RAB22A:miR-30-5p                           | RAB22A:miR-30e-5p |
| rs61713651 | chr20:56453967      | VAPB:miR-221/222                           | VAPB:miR-153      |
| rs61713651 | chr20:56453967      | VAPB:miR-376c                              | VAPB:miR-153      |
| rs35295928 | chr20:56687929      | STX16:miR-493-5p                           | STX16:miR-568     |
| rs60585835 | chr20:62059092      | ZNF512B:let-7/98:3                         | GM632:let-7e      |
| rs56253511 | chr21:10060673      | BAGE2:miR-122                              | BAGE2:miR-134     |
| rs56253511 | chr21:10060673      | BAGE2:miR-122                              | BAGE4:miR-134     |
| rs56253511 | chr21:10060673      | BAGE3:miR-122                              | BAGE2:miR-134     |
| rs56253511 | chr21:10060673      | BAGE3:miR-122                              | BAGE4:miR-134     |
| rs56253511 | chr21:10060673      | BAGE4:miR-122                              | BAGE2:miR-134     |
| rs56253511 | chr21:10060673      | BAGE4:miR-122                              | BAGE4:miR-134     |
| rs56253511 | chr21:10060673      | BAGE5:miR-122                              | BAGE2:miR-134     |
| rs56253511 | chr21:10060673      | BAGE5:miR-122                              | BAGE4:miR-134     |
| rs58652636 | chr21:17887948      | BTG3:miR-142-5p                            | BTG3:miR-142-5p   |
| rs3833344  | chr21:17887954      | BTG3:miR-142-5p                            | BTG3:miR-142-5p   |
| rs3833344  | chr21:17887954      | BTG3:miR-142-5p                            | BTG3:miR-376a*    |
| rs3833344  | chr21:17887954      | BTG3:miR-142-5p                            | BTG3:miR-559      |
| rs2850036  | chr21:34393355      | SLC5A3:miR-124.2/506:1                     | SLC5A3:miR-124a   |
| rs2850036  | chr21:34393355      | SLC5A3:miR-124.2/506:1                     | SLC5A3:miR-524    |
| rs2850036  | chr21:34393355      | SLC5A3:miR-124.2/506:1                     | SLC5A3:miR-525*   |
| rs6005034  | chr22:19637397      | CRKL:miR-188                               | CRKL:miR-598      |
| rs6005034  | chr22:19637397      | CRKL:miR-204/211                           | CRKL:miR-598      |
| rs5753562  | chr22:20133190      | HIC2:miR-93/291-3p/294/295/302/372/373/520 | HIC2:miR-372      |
| rs5753562  | chr22:20133190      | HIC2:miR-93/291-3p/294/295/302/372/373/520 | HIC2:miR-93       |
| rs9609460  | chr22:20134583      | HIC2:miR-135                               | HIC2:miR-644      |
| rs41282607 | chr22:20448229      | MAPK1:miR-217                              | MAPK1:miR-217     |
| rs41282607 | chr22:20448229      | MAPK1:miR-217                              | MAPK1:miR-606     |
| rs1801820  | chr22:31999178      | LARGE:miR-30-5p                            | LARGE:miR-30a-5p  |
| rs1801820  | chr22:31999178      | LARGE:miR-30-5p                            | LARGE:miR-30b     |
| rs1801820  | chr22:31999178      | LARGE:miR-30-5p                            | LARGE:miR-30c     |
| rs1801820  | chr22:31999178      | LARGE:miR-30-5p                            | LARGE:miR-30d     |
| rs1801820  | chr22:31999178      | LARGE:miR-30-5p                            | LARGE:miR-30e-5p  |
| rs5755721  | chr22:34120168      | HMOX1:miR-377                              | HMOX1:miR-377     |
| rs8226     | chr22:35007360      | MYH9:miR-124.1                             | MYH9:miR-124a     |

Supplemental Table 5: Consensus SNPs in miRNA target sites

| SNP ID     | SNP Position (hg18) | TargetScanS Prediction | PITA Prediction  |
|------------|---------------------|------------------------|------------------|
| rs8226     | chr22:35007360      | MYH9:miR-124.1         | MYH9:miR-524     |
| rs8226     | chr22:35007360      | MYH9:miR-124.1         | MYH9:miR-525*    |
| rs8226     | chr22:35007360      | MYH9:miR-124.2/506     | MYH9:miR-124a    |
| rs8226     | chr22:35007360      | MYH9:miR-124.2/506     | MYH9:miR-524     |
| rs8226     | chr22:35007360      | MYH9:miR-124.2/506     | MYH9:miR-525*    |
| rs1054208  | chr22:37016876      | CSNK1E:miR-495         | CSNK1E:miR-495   |
| rs11548925 | chr22:37016880      | CSNK1E:miR-495         | CSNK1E:miR-495   |
| rs56111992 | chr22:38415556      | CACNA1I:miR-377        | CACNA1I:miR-220  |
| rs4821943  | chr22:39052691      | TNRC6B:miR-384:2       | TNRC6B:miR-378   |
| rs1053764  | chr22:49232361      | SBF1:miR-30-5p         | SBF1:miR-302a*   |
| rs1053764  | chr22:49232361      | SBF1:miR-30-5p         | SBF1:miR-30a-5p  |
| rs1053764  | chr22:49232361      | SBF1:miR-30-5p         | SBF1:miR-30b     |
| rs1053764  | chr22:49232361      | SBF1:miR-30-5p         | SBF1:miR-30c     |
| rs1053764  | chr22:49232361      | SBF1:miR-30-5p         | SBF1:miR-30d     |
| rs1053764  | chr22:49232361      | SBF1:miR-30-5p         | SBF1:miR-30e-5p  |
| rs5927686  | chrX:31049752       | DMD:miR-101            | DMD:miR-139      |
| rs5927686  | chrX:31049752       | DMD:miR-101            | DMD:miR-144      |
| rs5927686  | chrX:31049752       | DMD:miR-101            | DMD:miR-374      |
| rs5927686  | chrX:31049752       | DMD:miR-139            | DMD:miR-139      |
| rs5927686  | chrX:31049752       | DMD:miR-139            | DMD:miR-144      |
| rs5927686  | chrX:31049752       | DMD:miR-139            | DMD:miR-374      |
| rs5927686  | chrX:31049752       | DMD:miR-144            | DMD:miR-139      |
| rs5927686  | chrX:31049752       | DMD:miR-144            | DMD:miR-144      |
| rs5927686  | chrX:31049752       | DMD:miR-144            | DMD:miR-374      |
| rs708452   | chrX:41094304       | DDX3X:miR-139          | DDX3X:miR-139    |
| rs708452   | chrX:41094304       | DDX3X:miR-139          | DDX3X:miR-17-3p  |
| rs3810701  | chrX:63321797       | FAM123B:miR-34/449     | FAM123B:miR-148b |
| rs3810701  | chrX:63321797       | FAM123B:miR-34/449     | FAM123B:miR-152  |
| rs3810701  | chrX:63321797       | FAM123B:miR-34/449     | FAM123B:miR-34a  |
| rs3810701  | chrX:63321797       | FAM123B:miR-34/449     | FAM123B:miR-34b  |
| rs3810701  | chrX:63321797       | FAM123B:miR-34/449     | FAM123B:miR-34c  |
| rs3810701  | chrX:63321797       | FAM123B:miR-34/449     | FAM123B:miR-449  |
| rs3810701  | chrX:63321797       | FAM123B:miR-34/449     | FAM123B:miR-449b |
| rs3810701  | chrX:63321797       | FAM123B:miR-34b        | FAM123B:miR-148b |
| rs3810701  | chrX:63321797       | FAM123B:miR-34b        | FAM123B:miR-152  |
| rs3810701  | chrX:63321797       | FAM123B:miR-34b        | FAM123B:miR-34a  |
| rs3810701  | chrX:63321797       | FAM123B:miR-34b        | FAM123B:miR-34b  |

**Supplemental Table 5: Consensus SNPs in miRNA target sites**

| <b>SNP ID</b> | <b>SNP Position (hg18)</b> | <b>TargetScanS Prediction</b> | <b>PITA Prediction</b> |
|---------------|----------------------------|-------------------------------|------------------------|
| rs3810701     | chrX:63321797              | FAM123B:miR-34b               | FAM123B:miR-34c        |
| rs3810701     | chrX:63321797              | FAM123B:miR-34b               | FAM123B:miR-449        |
| rs3810701     | chrX:63321797              | FAM123B:miR-34b               | FAM123B:miR-449b       |
| rs20385       | chrX:96743056              | DIAPH2:miR-410                | DIAPH2:miR-154         |
| rs1064553     | chrX:102817323             | MORF4L2:miR-29                | MORF4L2:miR-29a        |
| rs1064553     | chrX:102817323             | MORF4L2:miR-29                | MORF4L2:miR-29b        |
| rs1064553     | chrX:102817323             | MORF4L2:miR-29                | MORF4L2:miR-29c        |
| rs1064553     | chrX:102817323             | MORF4L2:miR-29                | MORF4L2:miR-767-5p     |
| rs1804954     | chrX:117809964             | IL13RA1:miR-22                | IL13RA1:miR-558        |
| rs1804954     | chrX:117809964             | IL13RA1:miR-22                | IL13RA1:miR-626        |
| rs25722       | chrX:146839569             | FMR1:miR-182                  | FMR1:miR-182           |
| rs25722       | chrX:146839569             | FMR1:miR-96                   | FMR1:miR-182           |
| rs2072126     | chrY:13541140              | DDX3Y:miR-15/16/195/424/497   | DDX3Y:miR-424          |
| rs2072126     | chrY:13541140              | DDX3Y:miR-503                 | DDX3Y:miR-424          |

©2009 Landes Bioscience.  
Do not distribute.

Supplemental Table 6: Coding SNPs with amino acid changes in the miRNA-processing genes

Supplemental Table 6: Coding SNPs with amino acid changes in the miRNA-processing genes

| SNP        | allele | Het <sup>a</sup> | se(Het) <sup>a</sup> | chr | position  | SNP information (gene, entrez id, class, amino acid changes) |
|------------|--------|------------------|----------------------|-----|-----------|--------------------------------------------------------------|
| rs12746607 | C/G    | N.A.             | N.A.                 | 1   | 36126617  | EIF2C1,26523,missense,P10A                                   |
| rs17855789 | A/G    | 0.00             | 0.00                 | 1   | 36132299  | EIF2C1,26523,missense,N242D                                  |
| rs34232554 | -/C    | N.A.             | N.A.                 | 1   | 36132505  | EIF2C1,26523,frameshift,-263L                                |
| rs12739932 | C/T    | N.A.             | N.A.                 | 1   | 36145149  | EIF2C1,26523,missense,T475I                                  |
| rs12735796 | A/T    | N.A.             | N.A.                 | 1   | 36145206  | EIF2C1,26523,missense,L494Q                                  |
| rs35257283 | -/C    | N.A.             | N.A.                 | 1   | 36152428  | EIF2C1,26523,frameshift,-,600                                |
| rs12564106 | C/T    | 0.00             | 0.00                 | 1   | 36153711  | EIF2C1,26523,missense,L670P                                  |
| rs57392277 | C/G    | N.A.             | N.A.                 | 1   | 37778702  | SNIP1,79753,missense,P190R                                   |
| rs41267307 | C/T    | N.A.             | N.A.                 | 1   | 37778939  | SNIP1,79753,missense,H111R                                   |
| rs17857029 | A/G    | N.A.             | N.A.                 | 1   | 112107095 | DDX20,11218,missense,K419E                                   |
| rs41310098 | A/G    | N.A.             | N.A.                 | 1   | 112110245 | DDX20,11218,missense,S559N                                   |
| rs6660448  | A/C    | 0.03             | 0.11                 | 1   | 112110344 | DDX20,11218,missense,D592A                                   |
| rs197412   | C/T    | 0.50             | 0.02                 | 1   | 112110476 | DDX20,11218,missense,T636I                                   |
| rs197414   | A/C    | 0.30             | 0.24                 | 1   | 112110646 | DDX20,11218,missense,S693R                                   |
| rs35755074 | A/G    | 0.03             | 0.11                 | 1   | 112110707 | DDX20,11218,missense,G713E                                   |
| rs17852892 | A/G    | N.A.             | N.A.                 | 1   | 112110815 | DDX20,11218,missense,G749E                                   |
| rs85276    | C/T    | 0.38             | 0.26                 | 1   | 112110854 | DDX20,11218,missense,T762I                                   |
| rs35745393 | -/C    | N.A.             | N.A.                 | 5   | 31442800  | RNASEN,29102,frameshift,Q1288-/Q1251-                        |
| rs1559205  | C/T    | 0.00             | 0.00                 | 5   | 31500113  | RNASEN,29102,missense,F854S/F817S                            |
| rs12517177 | C/G    | 0.00             | 0.00                 | 5   | 31503900  | RNASEN,29102,missense,V757L/V720L                            |
| rs55656741 | A/G    | N.A.             | N.A.                 | 5   | 31551414  | RNASEN,29102,missense,L321S/intron                           |
| rs35342496 | G/T    | 0.02             | 0.09                 | 5   | 31562598  | RNASEN,29102,missense,T67P                                   |
| rs11544382 | A/G    | N.A.             | N.A.                 | 6   | 43600320  | XPO5,57510,missense,T1115M;                                  |
| rs35794454 | A/G    | 0.03             | 0.11                 | 6   | 43609642  | POLR1C,9533,intron                                           |
| rs12173786 | C/G    | 0.00             | 0.00                 | 6   | 43625234  | XPO5,57510,missense,V808A                                    |
| rs11544379 | G/T    | 0.00             | 0.00                 | 6   | 43627087  | XPO5,57510,missense,N610K                                    |
| rs34324334 | C/T    | 0.09             | 0.19                 | 6   | 43642996  | XPO5,57510,missense,F552V                                    |
| rs1137903  | C/T    | N.A.             | N.A.                 | 6   | 43642996  | XPO5,57510,missense,N241S                                    |
| rs1137903  | C/T    | N.A.             | N.A.                 | 8   | 141618729 | EIF2C2,27161,missense,Y681H                                  |
| rs34807748 | -/G    | N.A.             | N.A.                 | 8   | 141626823 | EIF2C2,27161,frameshift,H558-                                |
| rs35649761 | -/G    | N.A.             | N.A.                 | 8   | 141626826 | EIF2C2,27161,frameshift,P557-                                |
| rs35369360 | C/G    | N.A.             | N.A.                 | 8   | 141626890 | EIF2C2,27161,missense,A536G                                  |
| rs3203547  | A/C    | 0.00             | 0.00                 | 12  | 52184816  | TARBP2,6895,missense,P167H/P188H                             |
| rs1126500  | C/T    | 0.00             | 0.00                 | 12  | 52185710  | TARBP2,6895,missense,F230S/F251S;                            |
| rs1496856  | C/T    | 0.00             | 0.00                 | 12  | 129396982 | NPFF,8620,near-gene-3                                        |
| rs35540071 | C/T    | 0.03             | 0.11                 | 12  | 129405469 | PIWIL1,9271,missense,K144R                                   |
| rs17856812 | G/T    | N.A.             | N.A.                 | 12  | 129407484 | PIWIL1,9271,missense,C419R                                   |
| rs1106042  | A/G    | 0.15             | 0.23                 | 12  | 129407591 | PIWIL1,9271,missense,N491K                                   |
| rs17852568 | C/T    | N.A.             | N.A.                 | 12  | 129411736 | PIWIL1,9271,missense,K527R                                   |
| rs11546494 | C/T    | N.A.             | N.A.                 | 12  | 129411736 | PIWIL1,9271,missense,P575L                                   |
| rs11546488 | G/T    | 0.00             | 0.05                 | 12  | 129923593 | RAN,5901,missense,L72F                                       |
| rs11546493 | A/G    | 0.00             | 0.00                 | 12  | 129925080 | RAN,5901,missense,I95R                                       |
| rs34678453 | -/G    | N.A.             | N.A.                 | 12  | 129925108 | RAN,5901,nonsense,*104W                                      |
| rs35252236 | -/A    | N.A.             | N.A.                 | 14  | 94635945  | DICER1,23405,frameshift,P1377-                               |
| rs34141151 | -/A    | N.A.             | N.A.                 | 14  | 94639518  | DICER1,23405,frameshift,-1323L                               |
| rs4566088  | C/G    | 0.00             | 0.00                 | 14  | 94639994  | DICER1,23405,frameshift,L1164-                               |
| rs12432511 | A/T    | 0.00             | 0.00                 | 14  | 94653725  | DICER1,23405,missense,T499R                                  |
| rs4788428  | A/C    | N.A.             | N.A.                 | 14  | 94662802  | DICER1,23405,missense,*257C                                  |
|            |        |                  |                      | 16  | 24695890  | TNRC6A,27327,missense,P100Q                                  |

**Supplemental Table 6: Coding SNPs with amino acid changes in the miRNA-processing genes**

| SNP        | allele | Het <sup>a</sup> | se(Het) <sup>a</sup> | chr | position | SNP information (gene, entrez id, class, amino acid changes) |
|------------|--------|------------------|----------------------|-----|----------|--------------------------------------------------------------|
| rs4788429  | A/C    | N.A.             | N.A.                 | 16  | 24695896 | TNRC6A,27327,missense,P102Q                                  |
| rs11644562 | A/C    | N.A.             | N.A.                 | 16  | 24695935 | TNRC6A,27327,missense,Q115P                                  |
| rs34861477 | -/C    | N.A.             | N.A.                 | 16  | 24695975 | TNRC6A,27327,frameshift,P128-                                |
| rs11639856 | A/T    | 0.22             | 0.25                 | 16  | 24696146 | TNRC6A,27327,missense,K185N                                  |
| rs11863919 | A/G    | 0.00             | 0.00                 | 16  | 24708943 | TNRC6A,27327,missense,I493M                                  |
| rs35333980 | -/T    | N.A.             | N.A.                 | 16  | 24709153 | TNRC6A,27327,frameshift,-,563                                |
| rs34192933 | -/G    | N.A.             | N.A.                 | 16  | 24709224 | TNRC6A,27327,frameshift,G587-                                |
| rs6497759  | A/G    | 0.21             | 0.25                 | 16  | 24709238 | TNRC6A,27327,missense,T592A                                  |
| rs3803716  | A/G    | 0.22             | 0.25                 | 16  | 24709826 | TNRC6A,27327,missense,S788P                                  |
| rs35474263 | G/T    | 0.06             | 0.17                 | 16  | 24709848 | TNRC6A,27327,missense,Y795S                                  |
| rs34732932 | A/T    | N.A.             | N.A.                 | 16  | 24710080 | TNRC6A,27327,missense,N872K                                  |
| rs2112782  | C/T    | 0.00             | 0.05                 | 16  | 24723106 | TNRC6A,27327,missense,K1268E                                 |
| rs35122306 | A/G    | 0.03             | 0.11                 | 16  | 24737439 | TNRC6A,27327,missense,M1666T                                 |
| rs7813     | C/T    | 0.45             | 0.15                 | 17  | 594936   | GEMIN4,50628,missense,C1033R                                 |
| rs17851764 | A/C    | N.A.             | N.A.                 | 17  | 595015   | GEMIN4,50628,missense,F1006L                                 |
| rs2740349  | A/G    | 0.29             | 0.25                 | 17  | 595248   | GEMIN4,50628,missense,N929D                                  |
| rs34610323 | A/G    | 0.11             | 0.21                 | 17  | 595296   | GEMIN4,50628,missense,I913V                                  |
| rs34936176 | G/T    | 0.49             | 0.06                 | 17  | 595563   | GEMIN4,50628,missense,F824V                                  |
| rs34549090 | -/T    | N.A.             | N.A.                 | 17  | 595578   | GEMIN4,50628,frameshift,N819-                                |
| rs34452716 | C/G    | 0.49             | 0.06                 | 17  | 595687   | GEMIN4,50628,missense,L782F                                  |
| rs8078660  | A/G    | 0.06             | 0.17                 | 17  | 595787   | GEMIN4,50628,missense,L749P                                  |
| rs1062923  | C/T    | 0.10             | 0.20                 | 17  | 595817   | GEMIN4,50628,missense,T739I                                  |
| rs34519093 | C/T    | 0.03             | 0.11                 | 17  | 595914   | GEMIN4,50628,missense,C707R                                  |
| rs3744741  | C/T    | 0.35             | 0.23                 | 17  | 595982   | GEMIN4,50628,missense,Q684R                                  |
| rs4968104  | A/T    | 0.30             | 0.25                 | 17  | 596255   | GEMIN4,50628,missense,V593E                                  |
| rs910925   | C/G    | 0.47             | 0.12                 | 17  | 596297   | GEMIN4,50628,missense,G579A                                  |
| rs35172207 | A/T    | N.A.             | N.A.                 | 17  | 596448   | GEMIN4,50628,missense,S529T                                  |
| rs34616851 | A/G    | 0.05             | 0.16                 | 17  | 596529   | GEMIN4,50628,missense,V502I                                  |
| rs2740348  | C/G    | 0.21             | 0.25                 | 17  | 596685   | GEMIN4,50628,missense,E450Q                                  |
| rs34604548 | C/T    | 0.02             | 0.09                 | 17  | 597489   | GEMIN4,50628,missense,L182F                                  |
| rs2106143  | G/T    | 0.00             | 0.00                 | 22  | 18453499 | DGCR8,54487,nonsense,*5E                                     |
| rs5748529  | C/T    | 0.00             | 0.00                 | 22  | 18453674 | DGCR8,54487,missense,V63A                                    |
| rs35987994 | C/T    | 0.49             | 0.07                 | 22  | 18454006 | DGCR8,54487,missense,V174I                                   |
| rs35569747 | C/T    | 0.03             | 0.11                 | 22  | 18462293 | DGCR8,54487,missense,R588K                                   |
| rs9606253  | G/T    | 0.00             | 0.00                 | 22  | 18476427 | DGCR8,54487,missense,N713K                                   |
| rs11546015 | A/G    | 0.00             | 0.05                 | 22  | 18476461 | DGCR8,54487,missense,D725N                                   |

a: N.A. stands for not available; Het stands for heterozygosity; se(Het) stands for standard error of heterozygosity estimation
